# Supplementary material
Source: PubMed Central journal article supplement (PMC2891347)

## Introduction of the (-)-Berkelic Acid Side Chain and Assignment of the C-22 Stereochemistry

Xiaoxing Wu, Jingye Zhou, and Barry B. Snider\*

Department of Chemistry MS 015, Brandeis University, Waltham, Massachusetts 02454-9110

### Supporting Information

|                                                                                                                                                              |          |
|--------------------------------------------------------------------------------------------------------------------------------------------------------------|----------|
| <b>Experimental Procedures</b> .....                                                                                                                         | S2-S20   |
| <b>Table S1.</b> Comparison of the $^{13}\text{C}$ and $^1\text{H}$ NMR Spectral Data Reported for Citronellal-derived Hydroxy Esters <b>42-45</b> .....     | S21      |
| <b>Table S2.</b> Comparison of the $^{13}\text{C}$ and $^1\text{H}$ NMR Spectral Data Reported for Berkelic Acid Intermediates <b>33</b> and <b>34</b> ..... | S22      |
| Data for Tetracyclic Model Acid prepared from <b>8a</b> in the NCI 60 Cell Screen.....                                                                       | S23      |
| Data for Synthetic Berkelic Acid ( <b>35</b> ) in the NCI 60 Cell Screen.....                                                                                | S24      |
| Data for Synthetic 22- <i>epi</i> -Berkelic Acid ( <b>36</b> ) in the NCI 60 Cell Screen.....                                                                | S25      |
| Copies of $^1\text{H}$ and $^{13}\text{C}$ NMR Spectra.....                                                                                                  | S26-S121 |

**General procedures.** NMR spectra were recorded at 400 MHz in CDCl<sub>3</sub> with TMS as an internal standard unless otherwise indicated. Chemical shifts are reported in  $\delta$ , coupling constants in Hz, and IR spectra in cm<sup>-1</sup>. Spectra in CDCl<sub>3</sub> are referenced to the residual solvent peaks at  $\delta$  7.27 (<sup>1</sup>H) and 77.00 (<sup>13</sup>C). Spectra in CD<sub>3</sub>OD are referenced to the residual solvent peaks at  $\delta$  3.30 (<sup>1</sup>H) and  $\delta$  49.00 (<sup>13</sup>C) to be consistent with the data for the natural product.<sup>1</sup> Spectra in acetone-*d*<sub>6</sub> are referenced to the residual solvent peaks at  $\delta$  2.05 (<sup>1</sup>H). Spectra in benzene-*d*<sub>6</sub> are referenced to the residual solvent peaks at  $\delta$  7.16 (<sup>1</sup>H) and  $\delta$  128.39 (<sup>13</sup>C). COSY spectra were recorded for all compounds and used to assign <sup>1</sup>H NMR spectra. The atom numbering used in the spectral tabulation of all tetracyclic compounds is that used in the isolation of berkelic acid<sup>1</sup> rather than that of the systematic name given in the procedure heading.

**Methyl (2*S*,3*S*,3'*aS*,4*S*,5'*R*)-4-[2-[(1,1-Dimethylethyl)diphenylsilyloxy]ethyl]-3',3'*a*,4,5,5',6'-hexahydro-8'-hydroxy-3-methyl-5'-pentyl-spiro[furan-2(3*H*),2'-[2*H*]pyrano[2,3,4-*de*][1]benzopyran]-9'-carboxylate (11) and Methyl (2*S*,3*S*,3'*aS*,4*S*,5'*R*)-3',3'*a*,4,5,5',6'-Hexahydro-8'-hydroxy-4-[2-hydroxyethyl]-3-methyl-5'-pentyl-spiro[furan-2(3*H*),2'-[2*H*]pyrano[2,3,4-*de*][1]benzopyran]-9'-carboxylate (12).** A solution of freshly prepared acid (*R*)-(-)-**5** (37.8 mg, 141  $\mu$ mol) and freshly prepared ketal aldehyde *ent*-**4b** (48.0 mg, 109  $\mu$ mol) was treated with Dowex 50WX8-400-H<sup>+</sup> ion exchange resin (25 mg) at 25 °C and stirred at 25 °C for 60 h. The reaction mixture was filtered through Celite to remove the catalyst and the filtrate was concentrated to give 79.1 mg of crude product.

An ether solution (2 mL) of diazomethane (0.67 mmol) was added dropwise to an ether solution (2 mL) of the 79 mg of crude product at 25 °C. The resulting solution was stirred at 25 °C for 20 min and carefully concentrated to give crude ester. Flash chromatography on silica gel (50:1 to 2:1 hexanes/EtOAc) gave 22.1 mg (30%) of **11** followed by 10.6 mg (22%) of **12**.

Data for **11**:  $[\alpha]_D^{22}$  -64.6 (*c* 1.11, CHCl<sub>3</sub>); <sup>1</sup>H NMR 11.4 (s, 1, OH), 7.66 (d, 4, *J* = 7.8), 7.48-7.33 (m, 6), 6.31 (s, 1, H-4), 4.76 (dd, 1, *J* = 12.2, 5.4, H-15), 4.25 (dd, 1, *J* = 8.5, 8.5, H-26), 3.83-3.76 (m, 1, H-9), 3.82 (s, 3, OMe), 3.73-3.64 (m, 2, 2 H-21), 3.55 (dd, 1, *J* = 8.5, 8.5, H-26), 2.76 (dd, 1, *J* = 17.6, 3.9, H-8), 2.60 (dd, 1, *J* = 17.6, 10.7, H-8), 2.45-2.33 (m, 1, H-19),

2.16 (dd, 1,  $J = 12.2, 5.4$ , H-16), 1.95 (dd, 1,  $J = 12.2, 12.2$ , H-16), 1.95-1.87 (m, 1, H-20), 1.73 (dq, 1,  $J = 10.5, 6.7$ , H-18), 1.68-1.60 (m, 1, H-10), 1.58-1.46 (m, 3), 1.44-1.24 (m, 5), 1.06 (d, 3,  $J = 6.7$ , H-25), 1.055 (s, 9), 0.90 (t, 3,  $J = 6.6$ );  $^{13}\text{C}$  NMR 171.6, 162.1, 152.1, 141.3, 135.5 (4 C), 133.5 (2 C), 129.71, 129.69, 127.7 (4 C), 112.7, 108.9, 108.3, 99.9, 75.1, 73.5, 68.2, 63.2, 52.0, 49.0, 41.6, 36.3, 35.5, 34.5, 34.0, 31.8, 26.8 (3 C), 25.1, 22.6, 19.1, 14.0, 11.7; IR (neat) 3398, 2957, 2932, 2859, 1660; HRMS (EI) calcd for  $\text{C}_{40}\text{H}_{52}\text{O}_7\text{Si}$  ( $\text{M}^+$ ) 672.3482, found 672.3480.

Data for **12**:  $[\alpha]_{\text{D}}^{22} - 98.7$  ( $c$  0.53,  $\text{CHCl}_3$ );  $^1\text{H}$  NMR 11.4 (s, 1, OH), 6.31 (s, 1, H-4), 4.76 (dd, 1,  $J = 12.2, 5.4$ , H-15), 4.25 (dd, 1,  $J = 8.5, 8.5$ , H-26), 3.91 (s, 3, OMe), 3.85-3.77 (m, 1, H-9), 3.72 (t, 2,  $J = 6.1$ , 2 H-21), 3.63 (dd, 1,  $J = 8.5, 8.5$ , H-26), 2.76 (dd, 1,  $J = 17.6, 3.9$ , H-8), 2.60 (dd, 1,  $J = 17.6, 10.7$ , H-8), 2.49-2.34 (m, 1, H-19), 2.18 (dd, 1,  $J = 12.2, 5.4$ , H-16), 1.96 (dd, 1,  $J = 12.2, 12.2$ , H-16), 1.99-1.90 (m, 1, H-20), 1.76 (dq, 1,  $J = 10.7, 6.3$ , H-18), 1.68-1.60 (m, 1, H-10), 1.60-1.46 (m, 3), 1.45-1.24 (m, 5), 1.09 (d, 3,  $J = 6.8$ , H-25), 0.90 (t, 3,  $J = 6.6$ );  $^{13}\text{C}$  NMR 171.6, 162.1, 152.0, 141.3, 112.7, 109.1, 108.3, 99.9, 75.1, 73.1, 68.1, 61.9, 52.0, 48.9, 40.8, 36.3, 35.3, 34.5, 33.9, 31.8, 25.1, 22.6, 14.0, 11.7; IR (neat) 3406, 2953, 2933, 2860, 1660; HRMS (EI) calcd for  $\text{C}_{24}\text{H}_{34}\text{O}_7$  ( $\text{M}^+$ ) 434.2305, found 434.2305.

**Deprotection of 11 to Give 12.** To a solution of **11** (47.4 mg, 70.4  $\mu\text{mol}$ ) in THF (3 mL) was added TBAF (282  $\mu\text{L}$ , 1 M in THF, 282  $\mu\text{mol}$ ) and AcOH (16.2  $\mu\text{L}$ , 282  $\mu\text{mol}$ ). The solution was stirred at 25 °C for 12 h. The mixture was concentrated under reduced pressure at 25 °C. The residue was treated with brine (3 mL) and 40 drops of saturated  $\text{NaHCO}_3$  to adjust the pH to 7 and the aqueous layer was extracted with ether ( $6 \times 10$  mL). The combined extracts were dried ( $\text{Na}_2\text{SO}_4$ ) and concentrated to yield 54.6 mg of crude **12**. Flash chromatography on silica gel (2:1 Hexanes/EtOAc) gave 27.8 mg (91%) of pure **12**.

**Methyl (2*S*,3*S*,3'*aS*,4*S*,5'*R*)-8'-Acetoxy-4-[2-[(1,1-dimethylethyl)diphenylsilyloxy]-ethyl]-3',3'*a*,4,5,5',6'-hexahydro-3-methyl-5'-pentyl-spiro[furan-2(3*H*),2'-[2*H*]pyrano[2,3,4-*de*][1]benzopyran]-9'-carboxylate (13).** Acetic anhydride (0.2 mL) and pyridine (0.5 mL) were added to **11** (19 mg, 28  $\mu\text{mol}$ ) under  $\text{N}_2$ . The reaction mixture was stirred at 25 °C for 12 h. The solvent was removed under reduced pressure to give 22.8 mg of **13**:  $^1\text{H}$  NMR 7.66 (d, 4,  $J =$

7.3), 7.46-7.35 (m, 6), 6.43 (s, 1, H-4), 4.83 (dd, 1,  $J = 12.2, 5.5$ , H-15), 4.20 (dd, 1,  $J = 8.5, 8.5$ , H-26), 3.87-3.78 (m, 1, H-9), 3.78 (s, 3, OMe), 3.67 (t, 2,  $J = 5.8$ , 2 H-21), 3.61 (dd, 1,  $J = 8.5, 8.5$ , H-26), 2.79 (dd, 1,  $J = 17.1, 3.7$ , H-8), 2.63 (dd, 1,  $J = 17.1, 10.7$ , H-8), 2.33-2.24 (m, 1, H-19), 2.25 (s, 3, OAc), 2.17 (dd, 1,  $J = 12.2, 5.5$ , H-16), 1.99 (dd, 1,  $J = 12.2, 12.2$ , H-16), 1.92-1.83 (m, 1, H-20), 1.76-1.57 (m, 2,  $J = 10.5, 6.7$ , H-18), 1.59-1.44 (m, 3), 1.44-1.20 (m, 5), 1.05 (s, 9), 1.04 (d, 3,  $J = 6.7$ , H-25), 0.90 (t, 3,  $J = 6.4$ ); HRMS (EI) calcd for  $C_{42}H_{54}O_8Si$  ( $M^+$ ) 714.3588, found 714.3581.

**Methyl (2*S*,3*S*,3'*aS*,4*S*,5'*R*)-8'-Acetoxy-3',3'*a*,4,5,5',6'-hexahydro-4-[2-hydroxyethyl]-3-methyl-5'-pentyl-spiro[furan-2(3*H*),2'-[2*H*]pyrano[2,3,4-*de*][1]benzopyran]-9'-carboxylate (14).** To a solution of **13** in THF (3 mL) was added TBAF (113  $\mu$ L, 1 M in THF, 113  $\mu$ mol) and AcOH (6.5  $\mu$ L, 113  $\mu$ mol). The solution was stirred at 25 °C for 8 h. The mixture was concentrated under reduced pressure at 25 °C. The residue was treated with brine (3 mL) and 20 drops of saturated  $NaHCO_3$  to adjust the pH to 7 and the aqueous layer was extracted with ether (5  $\times$  10 mL). The combined extracts were dried ( $Na_2SO_4$ ) and concentrated to yield 24.1 mg of crude **14**. Flash chromatography on silica gel (2:3 hexanes/EtOAc) gave 10.0 mg (74%) of pure **14**:  $^1H$  NMR 6.43 (s, 1, H-4), 4.85 (dd, 1,  $J = 12.2, 5.5$ , H-15), 4.23 (dd, 1,  $J = 8.5, 8.5$ , H-26), 3.87-3.89 (m, 1, H-9), 3.84 (s, 3, OMe), 3.73-3.64 (m, 2, 2 H-21), 3.61 (dd, 1,  $J = 8.5, 8.5$ , H-26), 2.79 (dd, 1,  $J = 17.1, 3.1$ , H-8), 2.63 (dd, 1,  $J = 17.1, 11.0$ , H-8), 2.34-2.23 (m, 1, H-19), 2.25 (s, 3, OAc), 2.18 (dd, 1,  $J = 12.2, 5.5$ , H-16), 2.00 (dd, 1,  $J = 12.2, 12.2$ , H-16), 1.96-1.87 (m, 1, H-20), 1.74 (dq, 1,  $J = 10.5, 6.7$ , H-18), 1.69-1.60 (m, 1, H-10), 1.59-1.46 (m, 3), 1.45-1.23 (m, 5), 1.07 (d, 3,  $J = 6.7$ , H-25), 0.90 (t, 3,  $J = 6.6$ );  $^{13}C$  NMR 169.4, 164.9, 150.1, 148.3, 137.2, 119.7, 114.1, 111.9, 109.1, 75.2, 73.0, 68.2, 61.9, 51.9, 48.9, 40.8, 36.2, 35.6, 34.1, 33.9, 31.8, 25.1, 22.6, 20.8, 14.0, 11.7; HRMS (EI) calcd for  $C_{26}H_{36}O_8$  ( $M^+$ ) 476.2410, found 476.2413.

**Methyl (2*S*,3*S*,3'*aS*,4*S*,5'*R*)-8'-Acetoxy-3',3'*a*,4,5,5',6'-hexahydro-4-[2-oxoethyl]-3-methyl-5'-pentyl-spiro[furan-2(3*H*),2'-[2*H*]pyrano[2,3,4-*de*][1]benzopyran]-9'-carboxylate (15).** Dess–Martin periodinane (17.8 mg, 42  $\mu$ mol) was added to a solution of alcohol **14**

(10 mg, 21  $\mu\text{mol}$ ) in  $\text{CH}_2\text{Cl}_2$  (2 mL) at 0 °C. The suspension was warmed to 25 °C and stirred for 1 h. The reaction mixture was quenched with saturated  $\text{Na}_2\text{S}_2\text{O}_3$  (3 mL) and stirred vigorously for another 30 min. The two layers were separated and the aqueous layer was extracted with ether ( $3 \times 4$  mL). The combined organic layers were washed with saturated  $\text{NaHCO}_3$  ( $3 \times 5$  mL), dried ( $\text{Na}_2\text{SO}_4$ ), and concentrated to yield 10.1 mg of crude aldehyde. Flash chromatography on MeOH-deactivated silica gel (4:1 hexanes/EtOAc) gave 8.7 mg (87%) of **15**:  $^1\text{H}$  NMR 9.83 (s, 1), 6.44 (s, 1, H-4), 4.83 (dd, 1,  $J = 12.2, 5.5$ , H-15), 4.37 (dd, 1,  $J = 8.5, 8.5$ , H-26), 3.85 (s, 3, OMe), 3.87-3.78 (m, 1, H-9), 3.73-3.64 (m, 2, 2 H-21), 3.52 (dd, 1,  $J = 8.5, 8.5$ , H-26), 2.83 (dd, 1,  $J = 17.7, 3.7$ , H-20), 2.79 (dd, 1,  $J = 17.1, 3.3$ , H-8), 2.70-2.60 (m, 1, H-19), 2.64 (dd, 1,  $J = 17.1, 10.7$ , H-8), 2.46 (dd, 1,  $J = 17.7, 9.8$ , H-20), 2.26 (s, 3, OAc), 2.18 (dd, 1,  $J = 12.2, 5.5$ , H-16), 2.00 (dd, 1,  $J = 12.2, 12.2$ , H-16), 1.76 (dq, 1,  $J = 10.4, 6.1$ , H-18), 1.70-1.58 (m, 1, H-10), 1.62-1.46 (m, 2), 1.44-1.20 (m, 5), 1.06 (d, 3,  $J = 6.1$ , H-25), 0.90 (t, 3,  $J = 6.7$ ).

**Methyl (2*S*,3*S*,3'*a**S*,4*S*,5'*R*)-8'-[(1,1-Dimethylethyl)dimethylsilyl]oxy-4-[2-[[[(1,1-dimethylethyl)dimethylsilyl]oxy]ethyl]-3',3'*a*,4,5,5',6'-hexahydro-3-methyl-5'-pentyl-spiro[furan-2(3*H*),2'-[2*H*]pyrano[2,3,4-*de*][1]benzopyran]-9'-carboxylate (16)**. To a solution of alcohol **12** (46.5 mg, 107  $\mu\text{mol}$ ) in  $\text{CH}_2\text{Cl}_2$  (3.5 mL) was added 2,6-lutidine (70  $\mu\text{L}$ , 589  $\mu\text{mol}$ ) and TBSOTf (123  $\mu\text{L}$ , 535  $\mu\text{mol}$ ) under  $\text{N}_2$  at 0 °C. The resulting solution was warmed to 25 °C and stirred for 12 h. The solvent was removed under reduced pressure. Flash chromatography on silica gel (40:1 hexanes/EtOAc) gave 58.6 mg (83%) of pure **16**:  $[\alpha]_{\text{D}}^{22} -75.5$  ( $c$  2.93,  $\text{CHCl}_3$ );  $^1\text{H}$  NMR 6.14 (s, 1, H-4), 4.79 (dd, 1,  $J = 12.2, 5.5$ , H-15), 4.22 (dd, 1,  $J = 8.5, 8.5$ , H-26), 3.86-3.77 (m, 1, H-9), 3.81 (s, 3, OMe), 3.70-3.56 (m, 2, 2 H-21), 3.62 (dd, 1,  $J = 8.5, 8.5$ , H-26), 2.72 (dd, 1,  $J = 17.1, 3.7$ , H-8), 2.57 (dd, 1,  $J = 17.1, 11.0$ , H-8), 2.26-2.16 (m, 1, H-19), 2.14 (dd, 1,  $J = 12.2, 5.5$ , H-16), 1.96 (dd, 1,  $J = 12.2, 12.2$ , H-16), 1.88-1.79 (m, 1, H-20), 1.73-1.60 (m, 2, H-18), 1.58-1.23 (m, 8), 1.02 (d, 3,  $J = 6.7$ , H-25), 0.95 (s, 9), 0.90 (t, 3,  $J = 6.7$ ), 0.89 (s, 9), 0.20 (s, 3), 0.18 (s, 3), 0.05 (s, 6);  $^{13}\text{C}$  NMR 166.4, 152.4, 149.0, 135.5, 114.5, 112.1, 110.5, 108.6, 75.3, 73.3, 68.2, 62.2, 51.7, 48.9, 41.4, 36.3, 35.9, 34.6, 34.2,

31.8, 25.9 (3 C), 25.5 (3 C), 25.1, 22.6, 18.2, 18.0, 14.0, 11.6, -4.4, -4.5, -5.4, -5.5; IR (neat) 2954, 2931, 2858, 1738; HRMS (EI) calcd for C<sub>36</sub>H<sub>62</sub>O<sub>7</sub>Si<sub>2</sub> (M<sup>+</sup>) 662.4034, found 662.4038.

**Methyl (2*S*,3*S*,3'*aS*,4*S*,5'*R*)-8'-[(1,1-Dimethylethyl)dimethylsilyl]oxy-3',3'*a*,4,5,5',6'-hexahydro-4-[2-hydroxyethyl]-3-methyl-5'-pentyl-spiro[furan-2(3*H*),2'-[2*H*]pyrano[2,3,4-*de*][1]benzopyran]-9'-carboxylate (17)**. Ce(OTf)<sub>n</sub>·xH<sub>2</sub>O (15.1 mg, 19-23% Ce basis) was added to a solution **16** (57.1 mg, 86 μmol) in THF/H<sub>2</sub>O (5 mL, 4:1) at 25 °C. The solution was stirred vigorously at 25 °C for 55 h. Brine (3 mL) was added and the mixture was extracted with EtOAc (4 × 4 mL). The combined extracts were dried (Na<sub>2</sub>SO<sub>4</sub>) and concentrated to yield 53.3 mg of crude **17**. Flash chromatography on silica gel (3:1 Hexanes/EtOAc) gave 38.4 mg (81%) of pure **17**: [α]<sub>D</sub><sup>22</sup> –98.0 (*c* 1.92, CHCl<sub>3</sub>); <sup>1</sup>H NMR 6.14 (s, 1, H-4), 4.79 (dd, 1, *J* = 12.2, 5.5, H-15), 4.22 (dd, 1, *J* = 8.5, 8.5, H-26), 3.86-3.78 (m, 1, H-9), 3.81 (s, 3, OMe), 3.72-3.62 (m, 2, 2 H-21), 3.59 (dd, 1, *J* = 8.5, 8.5, H-26), 2.73 (dd, 1, *J* = 17.1, 3.7, H-8), 2.58 (dd, 1, *J* = 17.1, 11.0, H-8), 2.28-2.18 (m, 1, H-19), 2.15 (dd, 1, *J* = 12.2, 5.5, H-16), 1.96 (dd, 1, *J* = 12.2, 12.2, H-16), 1.94-1.85 (m, 1, H-20), 1.76-1.58 (m, 2, H-18), 1.58-1.46 (m, 3), 1.45-1.24 (m, 5), 1.03 (d, 3, *J* = 6.7, H-25), 0.94 (s, 9), 0.90 (t, 3, *J* = 6.4), 0.20 (s, 3), 0.18 (s, 3); <sup>13</sup>C NMR 166.5, 152.4, 149.0, 135.5, 114.5, 112.0, 110.6, 108.7, 75.3, 72.9, 68.1, 61.8, 51.8, 48.9, 40.8, 36.3, 35.7, 34.5, 34.1, 31.8, 25.5 (3 C), 25.1, 22.6, 18.0, 14.0, 11.7, -4.4, -4.5; IR (neat) 3348, 2953, 2932, 2859, 1738, 1731; HRMS (EI) calcd for C<sub>30</sub>H<sub>48</sub>O<sub>7</sub>Si (M<sup>+</sup>) 548.3169, found 548.3175.

**Methyl (2*S*,3*S*,3'*aS*,4*S*,5'*R*)-8'-[(1,1-Dimethylethyl)dimethylsilyl]oxy-3',3'*a*,4,5,5',6'-hexahydro-4-[2-oxoethyl]-3-methyl-5'-pentyl-spiro[furan-2(3*H*),2'-[2*H*]pyrano[2,3,4-*de*][1]benzopyran]-9'-carboxylate (18)**. Dess–Martin periodinane (57 mg, 134.5 μmol) was added to a solution of alcohol **17** (36.9 mg, 67.2 μmol) in CH<sub>2</sub>Cl<sub>2</sub> (4 mL) at 0 °C. The suspension was allowed to warm to 25 °C and stirred for 1 h. The reaction mixture was quenched with saturated Na<sub>2</sub>S<sub>2</sub>O<sub>3</sub> (4 mL) and stirred vigorously for another 30 min. The two layers were separated and the aqueous layer was extracted with ether (3 × 4 mL). The combined organic layers were washed with saturated NaHCO<sub>3</sub> (3 × 5 mL), dried (Na<sub>2</sub>SO<sub>4</sub>), and concentrated to yield 39.5 mg of crude aldehyde **18**. Flash chromatography on silica gel (5:1 Hexanes/EtOAc)

gave 27.6 mg (85%) of pure **18**:  $[\alpha]_D^{22} -100.1$  ( $c$  1.38,  $\text{CHCl}_3$ );  $^1\text{H NMR}$  9.81 (s, 1), 6.15 (s, 1, H-4), 4.79 (dd, 1,  $J = 12.2, 5.5$ , H-15), 4.36 (dd, 1,  $J = 8.5, 8.5$ , H-26), 3.83 (s, 3, OMe), 3.85-3.77 (m, 1, H-9), 3.51 (dd, 1,  $J = 8.5, 8.5$ , H-26), 2.81 (dd, 1,  $J = 17.7, 3.1$ , H-20), 2.73 (dd, 1,  $J = 17.1, 3.1$ , H-8), 2.58 (dd, 1,  $J = 17.1, 10.5$ , H-8), 2.65-2.57 (m, 1, H-19), 2.44 (dd, 1,  $J = 17.7, 9.8$ , H-20), 2.15 (dd, 1,  $J = 12.2, 5.5$ , H-16), 1.96 (dd, 1,  $J = 12.2, 12.2$ , H-16), 1.73 (dq, 1,  $J = 10.4, 6.7$ , H-18), 1.68-1.59 (m, 1), 1.58-1.45 (m, 2), 1.45-1.24 (m, 5), 1.03 (d, 3,  $J = 6.7$ , H-25), 0.95 (s, 9), 0.90 (t, 3,  $J = 6.7$ ), 0.20 (s, 3), 0.18 (s, 3);  $^{13}\text{C NMR}$  200.6, 166.4, 152.5, 148.8, 135.6, 114.4, 112.1, 110.7, 108.3, 75.3, 72.2, 68.0, 51.8, 48.5, 47.2, 37.7, 36.3, 34.3, 34.1, 31.8, 25.5 (3 C), 25.1, 22.6, 18.0, 14.0, 11.5, -4.4, -4.5; IR (neat) 2957, 2933, 2860, 1739, 1732; HRMS (EI) calcd for  $\text{C}_{30}\text{H}_{46}\text{O}_7\text{Si}$  ( $\text{M}^+$ ) 546.3013, found 546.3016.

**1-Methoxy-1-trimethylsiloxy-2-methyl-1-butene (19)** was prepared by the literature procedure.<sup>24</sup>  $n\text{-BuLi}$  (12.6 mL, 1.6 M in hexane, 20 mmol) was added dropwise to a solution of diisopropylamine (2.82 mL, 20 mmol) in THF (15 mL) under  $\text{N}_2$  at 0 °C. The resulting solution was stirred at 0 °C for 30 min and cooled to –78 °C. A solution of methyl 2-methylbutanoate (2.64 mL, 20 mmol) in THF (6 mL) was added dropwise to the reaction mixture and the reaction was stirred at –78 °C for 1 h.  $\text{TMSCl}$  (3 mL, 24 mmol) was added dropwise to the reaction mixture and the reaction was slowly warmed up to 25 °C over 3 h. The reaction was quenched with ice water (20 mL). The two layers were separated and the aqueous layer was extracted with hexanes (3 × 20 mL). The combined organic extracts were dried ( $\text{Na}_2\text{SO}_4$ ) and concentrated at 25 °C. The crude oil was purified by distillation (bp 95-97 °C/35 torr) to give 2.78 g (74%, 7:3 mixture of isomers) of **19** as a colorless oil:  $^1\text{H NMR}$  3.50 (s, 3), 1.99 (q,  $0.3 \times 2$ ,  $J = 7.6$ ), 1.94 (q,  $0.7 \times 2$ ,  $J = 7.6$ ), 1.55 (s,  $0.7 \times 3$ ), 1.51 (s,  $0.3 \times 3$ ), 0.94 (q,  $0.3 \times 2$ ,  $J = 7.6$ ), 0.93 (q,  $0.7 \times 2$ ,  $J = 7.6$ ), 0.208 (s,  $0.3 \times 3$ ), 0.203 (s,  $0.7 \times 3$ ). The  $^1\text{H NMR}$  spectral data are identical to the literature data.<sup>12</sup>

**Methyl (2*S*,3*S*,3'*aS*,4*S*,5'*R*)- $\alpha$ ,3-Dimethyl-8'-[(1,1-dimethylethyl)dimethylsilyloxy- $\alpha$ -ethyl-3',3'*a*,4,5,5',6'-hexahydro-9'-(methoxycarbonyl)-3-methyl- $\beta$ -oxo-5'-pentyl-spiro[furan-2(3*H*),2'-[2*H*]pyrano[2,3,4-*de*][1]benzopyran]-4-butanoate (20)**. To a solution of

aldehyde **18** (6.0 mg, 11.0  $\mu\text{mol}$ ), LiCl (1.5 mg, 35.5  $\mu\text{mol}$ ) and 4 Å molecular sieves (50 mg) in DMF (0.5 mL) was added silyl ketene acetal (**19**, 17.5 mg, 110  $\mu\text{mol}$ ) and *N*-methylimidazole (2  $\mu\text{L}$ , 25  $\mu\text{mol}$ ) under  $\text{N}_2$  at 25 °C. The reaction mixture was stirred at 25 °C for 25 h. The mixture was quenched with 1 M HCl (3 mL) and extracted with EtOAc (4  $\times$  4 mL). The combined organic layers were dried ( $\text{MgSO}_4$ ) and concentrated to yield 8.5 mg of crude aldol products that was used without further purification.

The above aldol products in  $\text{CH}_2\text{Cl}_2$  (1 mL) were treated with Dess–Martin periodinane (9.3 mg, 22  $\mu\text{mol}$ ) at 0 °C. The suspension was allowed to warm to 25 °C and continued to stir for 12 h. The reaction mixture was quenched with saturated  $\text{Na}_2\text{S}_2\text{O}_3$  (3 mL) and continued to stir vigorously for 30 min. The mixture was extracted with ether (4  $\times$  3 mL). The combined organic layers were washed with saturated  $\text{NaHCO}_3$  (3  $\times$  5 mL), dried ( $\text{Na}_2\text{SO}_4$ ), and concentrated to yield 7.9 mg of keto esters. Flash chromatography on silica gel (10:1 hexanes/EtOAc) gave 3.2 mg (44%) of **20** as a 1:1 inseparable mixture:  $^1\text{H}$  NMR 6.14 (s, 1, H-4), 4.78 (dd, 1,  $J = 12.2, 5.2$ , H-15), 4.35 (dd, 1,  $J = 8.2, 8.2$ , H-26), 3.83 (s, 3, OMe), 3.85-3.76 (m, 1, H-9), 3.74 (s, 3, OMe), 3.44 (dd, 1,  $J = 8.2, 8.2$ , H-26), 2.84-2.68 (m, 2, H-20, H-8), 2.62-2.50 (m, 2, H-19, H-8), 2.44-2.31 (m, 1, H-20), 2.13 (dd, 1,  $J = 12.2, 5.2$ , H-16), 2.02-1.90 (m, 1, H-23), 1.95 (dd, 1,  $J = 12.2, 12.2$ , H-16), 1.88-1.76 (m, 1, H-23), 1.73-1.45 (m, 4, H-18), 1.45-1.19 (m, 5), 1.34 (s, 0.5  $\times$  3), 1.32 (s, 0.5  $\times$  3), 1.00 (d, 3,  $J = 6.7$ , H-25), 0.94 (s, 9), 0.93-0.76 (m, 6), 0.19 (s, 3), 0.18 (s, 3); HRMS (EI) calcd for  $\text{C}_{36}\text{H}_{56}\text{O}_9\text{Si}$  ( $\text{M}^+$ ) 660.3694, found 660.3688.

**Methyl (2*S*,3*S*,3'*aS*,4*S*,5'*R*)- $\alpha$ ,3-Dimethyl- $\alpha$ -ethyl-3',3'*a*,4,5,5',6'-hexahydro-8'-hydroxy-9'-(methoxycarbonyl)-3-methyl- $\beta$ -oxo-5'-pentyl-spiro[furan-2(3*H*),2'-[2*H*]pyrano[2,3,4-*de*][1]benzopyran]-4-butanoate (21).** To a solution of **20** (2.9 mg, 4.4  $\mu\text{mol}$ ) in MeOH (1 mL) was treated with KF (10 mg, 65.8  $\mu\text{mol}$ ) at 25 °C. The suspension was stirred at 25 °C for 40 min. The solid was filtered off and the solvent was removed under reduced pressure. Flash chromatography on silica gel (7:1 Hexanes/EtOAc) gave 2.1 mg (88%) of **21** as an inseparable mixture of berkeley acid methyl ester and its 22-epimer:  $[\alpha]_{\text{D}}^{22} -97.1$  ( $c$  0.07,  $\text{CHCl}_3$ );  $^1\text{H}$  NMR ( $\text{CDCl}_3$ , the residual peak of solvent is referred as  $\delta$  7.24 rather than 7.27 to



facilitate comparison with the literature data<sup>1</sup>) 11.37 (s, 1, OH), 6.29 (s, 1, H-4), 4.73 (dd, 1,  $J = 12.2, 5.4$ , H-15), 4.32 (dd, 1,  $J = 8.3, 8.3$ , H-26), 3.93 (s, 3, OMe), 3.82-3.73 (m, 1, H-9), 3.73 (s, 3, OMe), 3.44 (dd, 1,  $J = 8.3, 8.3$ , H-26), 2.83-2.69 (m, 3, H-20, H-19, H-8), 2.58 (dd, 1,  $J = 17.6, 10.8$ , H-8), 2.43 (dd,  $0.5 \times 1$ ,  $J = 17.6, 10.7$ , H-20), 2.41 (dd,  $0.5 \times 1$ ,  $J = 17.6, 10.7$ , H-20), 2.14 (dd, 1,  $J = 12.2, 5.4$ , H-16), 2.02-1.90 (m, 1, H-23), 1.93 (dd, 1,  $J = 12.2, 12.2$ , H-16), 1.88-1.76 (m, 1, H-23), 1.74-1.62 (m, 1, H-18), 1.66-1.43 (m, 3), 1.43-1.20 (m, 5), 1.34 (s,  $0.5 \times 3$ ), 1.32 (s,  $0.5 \times 3$ ), 1.02 (d, 3,  $J = 6.4$ , H-25), 0.93-0.76 (m, 6); <sup>13</sup>C NMR 206.8 (tiny), 173.45 ( $0.5 \times 1$ , C-28), 173.42 ( $0.5 \times 1$ , C-28), 171.6, 162.1, 151.9, 141.2, 112.5, 108.6, 108.4, 100.0, 75.1, 72.87 ( $0.5 \times 1$ , C-26), 72.81 ( $0.5 \times 1$ , C-26), 68.1, 59.9, 52.4, 52.2, 48.3, 41.67 ( $0.5 \times 1$ , C-20), 41.66 ( $0.5 \times 1$ , C-20), 38.91 ( $0.5 \times 1$ , C-19), 38.87 ( $0.5 \times 1$ , C-19), 36.3, 34.5, 33.6, 31.8, 27.86 ( $0.5 \times 1$ , C-23), 27.80 ( $0.5 \times 1$ , C-23), 25.1, 22.6, 18.40 ( $0.5 \times 1$ , C-27), 18.34 ( $0.5 \times 1$ , C-27), 14.1, 11.6, 8.67 ( $0.5 \times 1$ , C-24), 8.63 ( $0.5 \times 1$ , C-24); IR (neat) 3390, 2953, 2934, 2860, 1715, 1660; HRMS (EI) calcd for C<sub>30</sub>H<sub>42</sub>O<sub>9</sub> (M<sup>+</sup>) 546.2829, found 546.2827. The <sup>1</sup>H NMR spectral data in CDCl<sub>3</sub> match those of berkelic acid methyl ester.<sup>1</sup>

**2-Propenyl (2*S*,3*S*,3'*aS*,4*S*,5'*R*)-4-[2-[(1,1-Dimethylethyl)diphenylsilyloxy]ethyl]-3',3'*a*,4,5,5',6'-hexahydro-3-methyl-5'-pentyl-8'-(2-propenyloxy)-spiro[furan-2(3*H*),2'-[2*H*]pyrano[2,3,4-*de*][1]benzopyran]-9'-carboxylate (22) and 2-Propenyl (2*S*,3*S*,3'*aS*,4*S*,5'*R*)-3',3'*a*,4,5,5',6'-Hexahydro-4-[2-hydroxyethyl]-3-methyl-5'-pentyl-8'-(2-propenyloxy)-spiro[furan-2(3*H*),2'-[2*H*]pyrano[2,3,4-*de*][1]benzopyran]-9'-carboxylate (23).** A solution of freshly prepared acid (*R*)-(–)-**5** (42.0 mg, 157 μmol) and freshly prepared ketal aldehyde *ent*-**4b** (43 mg, 97.7 μmol) was treated with Dowex 50WX8-400-H<sup>+</sup> ion exchange resin (23 mg) at 25 °C and the solution was stirred for 60 h. The reaction mixture was filtered through Celite to remove the catalyst and the filtrate was concentrated to give 78.8 mg of crude product.

To a suspension of the above crude product and K<sub>2</sub>CO<sub>3</sub> (108 mg, 784 μmol) in DMF (2 mL) was added allyl bromide (102 μL, 1.18 mmol) under N<sub>2</sub> at 25 °C. The reaction mixture was stirred at 25 °C for 12 h. H<sub>2</sub>O (4 mL) was added and the mixture was extracted with CH<sub>2</sub>Cl<sub>2</sub>

(4 × 5 mL). The combined organic layers were dried (Na<sub>2</sub>SO<sub>4</sub>) and concentrated under reduced pressure. Flash chromatography on silica gel (30:1 to 2:1 hexanes/EtOAc) gave 23.1 mg (32%) of **22** followed by 10.0 mg (20%) of **23**.

Data for **22**:  $[\alpha]_D^{22}$  -60.0 (*c* 2.31, CHCl<sub>3</sub>); <sup>1</sup>H NMR 7.66 (d, 4, *J* = 6.7), 7.47-7.34 (m, 6), 6.23 (s, 1, H-4), 6.02-5.90 (m, 2), 5.36 (br d, 1, *J* = 17.7), 5.33 (br d, 1, *J* = 17.1), 5.22 (br d, 1, *J* = 10.4), 5.15 (br d, 1, *J* = 10.4), 4.84-4.65 (m, 2, H-15), 4.71 (dd, 1, *J* = 12.3, 5.2), 4.51 (d, 2, *J* = 4.9), 4.20 (dd, 1, *J* = 8.5, 8.5, H-26), 3.83-3.78 (m, 1, H-9), 3.72-3.60 (m, 2, 2 H-21), 3.62 (dd, 1, *J* = 8.5, 8.5, H-26), 2.75 (dd, 1, *J* = 17.1, 3.7, H-8), 2.60 (dd, 1, *J* = 17.1, 10.7, H-8), 2.30-2.18 (m, 1, H-19), 2.15 (dd, 1, *J* = 12.2, 4.9, H-16), 1.97 (dd, 1, *J* = 12.2, 12.2, H-16), 1.89-1.80 (m, 1, H-20), 1.73-1.59 (m, 2, H-18, H-10), 1.58-1.46 (m, 3), 1.43-1.25 (m, 5), 1.05 (s, 9), 1.01 (d, 3, *J* = 6.7, H-25), 0.90 (t, 3, *J* = 6.4); <sup>13</sup>C NMR 165.5, 155.5, 149.0, 135.8, 135.5 (4 C), 133.55, 133.52, 132.9, 132.3, 129.7 (2 C), 127.7 (4 C), 118.1, 117.1, 114.6, 109.6, 108.7, 104.2, 75.3, 73.3, 69.4, 68.1, 65.6, 63.2, 49.0, 41.3, 36.3, 35.6, 34.5, 34.4, 31.8, 26.8 (3 C), 25.1, 22.6, 19.1, 14.0, 11.6; IR (neat) 2957, 2932, 2859, 1739, 1732; HRMS (EI) calcd for C<sub>45</sub>H<sub>58</sub>O<sub>7</sub>Si (M<sup>+</sup>) 738.3952, found 738.3953.

Data for **23**:  $[\alpha]_D^{22}$  -88.1 (*c* 1.00, CHCl<sub>3</sub>); <sup>1</sup>H NMR 6.23 (s, 1, H-4), 6.06-5.92 (m, 2), 5.39 (br d, 1, *J* = 17.1), 5.36 (br d, 1, *J* = 17.1), 5.24 (br d, 1, *J* = 9.8), 5.23 (br d, 1, *J* = 10.4), 4.86-4.76 (m, 2, H-15), 4.74 (dd, 1, *J* = 13.4, 5.5), 4.51 (d, 2, *J* = 4.9), 4.20 (dd, 1, *J* = 8.2, 8.2, H-26), 3.86-3.77 (m, 1, H-9), 3.72-3.58 (m, 2, 2 H-21), 3.59 (dd, 1, *J* = 8.2, 8.2, H-26), 2.75 (dd, 1, *J* = 16.5, 4.0, H-8), 2.60 (dd, 1, *J* = 16.5, 11.0, H-8), 2.30-2.19 (m, 1, H-19), 2.16 (dd, 1, *J* = 12.2, 5.5, H-16), 1.97 (dd, 1, *J* = 12.2, 12.2, H-16), 1.92-1.85 (m, 1, H-20), 1.71 (dq, 1, *J* = 10.5, 6.7, H-18), 1.70-1.60 (m, 1, H-10), 1.58-1.46 (m, 3), 1.45-1.25 (m, 5), 1.03 (d, 3, *J* = 6.7, H-25), 0.90 (t, 3, *J* = 6.7); <sup>13</sup>C NMR 165.6, 155.5, 149.0, 135.9, 132.9, 132.3, 118.1, 117.1, 114.6, 109.5, 108.8, 104.3, 75.3, 72.9, 69.4, 68.1, 65.6, 61.8, 48.9, 40.6, 36.3, 35.7, 34.43, 34.40, 31.8, 25.1, 22.6, 14.0, 11.7; IR (neat) 3432, 2932, 2876, 1739, 1732, 1714; HRMS (EI) calcd for C<sub>29</sub>H<sub>40</sub>O<sub>7</sub> (M<sup>+</sup>) 500.2774, found 500.2769.

**Deprotection of 22 to Give 23.** To a solution of **23** (64.7 mg, 88  $\mu$ mol) in THF (4 mL) was added TBAF (350  $\mu$ L, 1 M in THF, 350  $\mu$ mol) and AcOH (20  $\mu$ L, 350  $\mu$ mol). The solution was stirred at 25 °C for 12 h. The mixture was concentrated under reduced pressure at 25 °C. The residue was treated with brine (4 mL) and 45 drops of saturated NaHCO<sub>3</sub> to adjust the pH to 7 and the aqueous layer was extracted with distilled ether (6  $\times$  10 mL). The combined extracts were dried (Na<sub>2</sub>SO<sub>4</sub>) and concentrated to yield 73.6 mg of crude **23**. Flash chromatography on silica gel (2:1 hexanes/EtOAc) gave 37.7 mg (86%) of pure **23**.

**2-Propenyl (2*S*,3*S*,3'*aS*,4*S*,5'*R*)-3',3'*a*,4,5,5',6'-Hexahydro-3-methyl-4-[2-oxoethyl]-5'-pentyl-8'-(2-propenyloxy)-spiro[furan-2(3*H*),2'-[2*H*]pyrano[2,3,4-*de*][1]benzopyran]-9'-carboxylate (24).** Dess–Martin periodinane (178 mg, 0.42 mmol) was added to a solution of alcohol **23** (105 mg, 0.21 mmol) in CH<sub>2</sub>Cl<sub>2</sub> (10 mL) at 0 °C. The suspension was allowed to warm to 25 °C and continued to stir for 1 h. The solvent was removed under reduced pressure at 25 °C. Flash chromatography on MeOH-deactivated silica gel (5:1 hexanes/EtOAc) gave 92.4 mg (88%) of pure **24**:  $[\alpha]_D^{22}$  -103.9 (*c* 0.18, CHCl<sub>3</sub>); <sup>1</sup>H NMR 9.81 (s, 1), 6.24 (s, 1, H-4), 6.08-5.92 (m, 2), 5.40 (br d, 1, *J* = 16.5), 5.36 (br d, 1, *J* = 15.9), 5.26 (br d, 1, *J* = 11.6), 5.23 (br d, 1, *J* = 11.0), 4.85 (dd, 1, *J* = 13.3, 6.1), 4.80 (dd, 1, *J* = 12.2, 5.5, H-15), 4.74 (dd, 1, *J* = 13.3, 5.8), 4.52 (d, 2, *J* = 4.9), 4.35 (dd, 1, *J* = 8.5, 8.5, H-26), 3.88-3.78 (m, 1, H-9), 3.51 (dd, 1, *J* = 8.5, 8.5, H-26), 2.80 (dd, 1, *J* = 17.7, 3.7, H-20), 2.75 (dd, 1, *J* = 16.5, 4.3, H-8), 2.61 (dd, 1, *J* = 16.5, 11.0, H-8), 2.66-2.57 (m, 1, H-19), 2.43 (dd, 1, *J* = 17.7, 9.8, H-20), 2.16 (dd, 1, *J* = 12.2, 5.5, H-16), 1.96 (dd, 1, *J* = 12.2, 12.2, H-16), 1.73 (dq, 1, *J* = 10.4, 6.7, H-18), 1.71-1.60 (m, 1, H-10), 1.58-1.46 (m, 2), 1.45-1.24 (m, 5), 1.04 (d, 3, *J* = 6.7, H-25), 0.90 (t, 3, *J* = 6.7); <sup>13</sup>C NMR 200.5, 165.5, 155.6, 148.8, 135.9, 132.9, 132.3, 118.4, 117.2, 114.5, 109.6, 108.4, 104.5, 75.3, 72.2, 69.4, 68.0, 65.7, 48.5, 47.3, 37.6, 36.3, 34.4, 34.3, 31.8, 25.1, 22.6, 14.0, 11.5; IR (neat) 2957, 2932, 2860, 1738, 1732, 1716; HRMS (EI) calcd for C<sub>29</sub>H<sub>38</sub>O<sub>7</sub> (M<sup>+</sup>) 498.2618, found 498.2611.

**Methyl (2*S*,3*S*,3'*aS*,4*S*,5'*R*)- $\alpha$ ,3-Dimethyl- $\alpha$ -ethyl-3',3'*a*,4,5,5',6'-hexahydro-3-methyl- $\beta$ -oxo-5'-pentyl-8'-(2-propenyloxy)-9'-(2-propenyloxycarbonyl)-spiro[furan-**

**2(3*H*),2'-[2*H*]pyrano[2,3,4-*de*][1]benzopyran]-4-butanoate.** To a solution of aldehyde **24** (12.0 mg, 24.0  $\mu$ mol), LiCl (2.1 mg, 49.6  $\mu$ mol) and 4 Å molecular sieves (50 mg) in DMF (0.5 mL) was added silyl ketene acetal **19** (38.2 mg, 240  $\mu$ mol) and *N*-methylimidazole (4  $\mu$ L, 50  $\mu$ mol) under N<sub>2</sub> at 25 °C. The reaction mixture was stirred at 25 °C for 25 h. The mixture was quenched with 1 M HCl (3 mL) and extracted with EtOAc (4  $\times$  4 mL). The combined organic layers were dried (MgSO<sub>4</sub>) and concentrated to yield 14.9 mg of crude aldol product that was used without further purification.

The above aldol adducts in CH<sub>2</sub>Cl<sub>2</sub> (1.5 mL) were treated with Dess–Martin periodinane (20.4 mg, 48  $\mu$ mol) at 0 °C. The suspension was allowed to warm to 25 °C and continued to stir for 12 h. The solvent was removed under reduced pressure at 25 °C. Flash chromatography on silica gel (10:1 hexanes/EtOAc) gave 8.8 mg (60%) of the allyl ether and ester of **25** as a 1:1 inseparable mixture:  $[\alpha]_D^{22}$  –74.6 (*c* 0.19, CHCl<sub>3</sub>); <sup>1</sup>H NMR 6.23 (s, 1, H-4), 6.08-5.92 (m, 2), 5.40 (br d, 1, *J* = 17.7), 5.36 (br d, 1, *J* = 17.1), 5.27 (br d, 1, *J* = 10.4), 5.23 (br d, 1, *J* = 10.4), 4.85 (dd, 1, *J* = 13.4, 6.1), 4.79 (dd, 1, *J* = 12.2, 5.5, H-15), 4.74 (dd, 1, *J* = 13.1, 5.8), 4.51 (d, 2, *J* = 4.9), 4.35 (dd, 1, *J* = 8.5, 8.5, H-26), 3.86-3.78 (m, 1, H-9), 3.74 (s, 3, OMe), 3.45 (dd, 1, *J* = 8.5, 8.5, H-26), 2.81 (dd, 0.5  $\times$  1, *J* = 17.7, 3.1, H-20), 2.77 (dd, 0.5  $\times$  1, *J* = 17.7, 3.4, H-20), 2.75 (dd, 1, *J* = 16.5, 3.7, H-8), 2.60 (dd, 1, *J* = 17.1, 11.0, H-8), 2.62-2.50 (m, 1, H-19), 2.43 (dd, 0.5  $\times$  1, *J* = 17.7, 10.4, H-20), 2.35 (dd, 0.5  $\times$  1, *J* = 17.7, 10.4, H-20), 2.14 (dd, 1, *J* = 12.2, 5.5, H-16), 1.96 (dd, 1, *J* = 12.2, 12.2, H-16), 2.02-1.91 (m, 1, H-23), 1.82 (dq, 1, *J* = 14.0, 7.3, H-23), 1.72-1.58 (m, 2), 1.58-1.46 (m, 2), 1.45-1.24 (m, 5), 1.34 (s, 0.5  $\times$  3, H-27), 1.33 (s, 0.5  $\times$  3, H-27), 1.01 (d, 3, *J* = 6.7, H-25), 0.90 (t, 3, *J* = 6.4), 0.84 (t, 0.5  $\times$  3, *J* = 7.3), 0.83 (t, 0.5  $\times$  3, *J* = 7.3); <sup>13</sup>C NMR 206.6 (0.5  $\times$  1), 206.5 (0.5  $\times$  1), 173.5, 165.5, 155.6, 148.9, 135.8, 132.9, 132.2, 118.5, 117.2, 114.5, 109.7, 108.4, 104.4, 75.3, 72.8, 69.4, 68.0, 65.7, 59.7, 52.4, 48.46 (0.5  $\times$  1), 48.43 (0.5  $\times$  1), 42.0, 38.9, 36.3, 34.41, 34.40, 31.8, 27.86 (0.5  $\times$  1), 27.80 (0.5  $\times$  1), 25.1, 22.6, 18.40 (0.5  $\times$  1), 18.32 (0.5  $\times$  1), 14.0, 11.6, 8.64 (0.5  $\times$  1), 8.59 (0.5  $\times$  1); IR (neat) 2953, 2932, 2856, 1739, 1732, 1714; HRMS (EI) calcd for C<sub>35</sub>H<sub>48</sub>O<sub>9</sub> (M<sup>+</sup>) 612.3298, found 612.3302.

**Methyl (2*S*,3*S*,3'*aS*,4*S*,5'*R*)-9'-Carboxy- $\alpha$ ,3-dimethyl- $\alpha$ -ethyl-3',3'*a*,4,5,5',6'-hexahydro-8'-hydroxy-3-methyl- $\beta$ -oxo-5'-pentyl-spiro[furan-2(3*H*),2'-[2*H*]pyrano[2,3,4-*de*][1]benzopyran]-4-butanoate (25).** To a solution of the allyl ester and ether (6.0 mg, 9.8  $\mu$ mol) and Pd(PPh<sub>3</sub>)<sub>4</sub> (3.4 mg, 2.9  $\mu$ mol) in dry THF (1 mL) was added NEt<sub>3</sub> (123  $\mu$ L, 0.88 mmol) and HCOOH (33  $\mu$ L, 0.88 mmol) under N<sub>2</sub> at 25 °C. The yellow solution was stirred at 25 °C for 15 h and quenched with saturated NaHCO<sub>3</sub> (5 mL). The aqueous layer was extracted with ether (4  $\times$  5 mL). The combined organic layers were dried (MgSO<sub>4</sub>) and concentrated. Flash chromatography on silica gel (80:1:0 to 200:1:1 CH<sub>2</sub>Cl<sub>2</sub>/MeOH/AcOH) gave 4.2 mg (81%) of **25** as a 1:1 inseparable mixture of berkeley acid and its epimer:  $[\alpha]_D^{22} - 104.6$  (*c* 0.07, MeOH); <sup>1</sup>H NMR (CDCl<sub>3</sub>, the residual peak of solvent is referred as  $\delta$  7.24 rather than 7.27 to facilitate comparison with the literature data<sup>1</sup>) 11.83 (s, 1, OH), 11.13-10.87 (br, 1, OH), 6.42 (s, 1, H-4), 4.77 (dd, 1, *J* = 12.2, 5.4, H-15), 4.45 (dd, 0.5  $\times$  1, *J* = 8.5, 8.5, H-26), 4.44 (dd, 0.5  $\times$  1, *J* = 8.5, 8.5, H-26), 3.85-3.76 (m, 1, H-9), 3.73 (s, 3, OMe), 3.59 (dd, 1, *J* = 8.5, 8.5, H-26), 2.90 (dd, 0.5  $\times$  1, *J* = 17.6, 2.9, H-20), 2.85 (dd, 0.5  $\times$  1, *J* = 17.0, 2.4, H-20), 2.79 (dd, 0.5  $\times$  1, *J* = 17.6, 3.9, H-8), 2.78 (dd, 0.5  $\times$  1, *J* = 17.7, 3.7, H-8), 2.60 (dd, 1, *J* = 17.7, 11.0, H-8), 2.54-2.45 (m, 1, H-19), 2.42 (dd, 0.5  $\times$  1, *J* = 17.0, 9.8, H-20), 2.38 (dd, 0.5  $\times$  1, *J* = 17.6, 10.0, H-20), 2.21 (dd, 1, *J* = 12.2, 5.4, H-16), 2.05 (dd, 1, *J* = 12.2, 12.2, H-16), 1.95 (dq, 1, *J* = 14.2, 7.3, H-23), 1.87 (dq, 1, *J* = 10.7, 6.8, H-18), 1.80 (dq, 1, *J* = 14.2, 7.3, H-23), 1.68-1.57 (m, 1), 1.58-1.43 (m, 2), 1.43-1.20 (m, 5), 1.33 (s, 0.5  $\times$  3, H-27), 1.32 (s, 0.5  $\times$  3, H-27), 1.09 (d, 3, *J* = 6.8, H-25), 0.88 (t, 3, *J* = 6.6), 0.83 (t, 0.5  $\times$  3, *J* = 7.6, H-24), 0.81 (t, 0.5  $\times$  3, *J* = 7.3, H-24); <sup>1</sup>H NMR (CD<sub>3</sub>OD, 500 MHz) 6.27 (s, 1, H-4), 4.72 (dd, 1, *J* = 12.2, 5.4, H-15), 4.30 (dd, 1, *J* = 8.5, 8.5, H-26), 3.84-3.77 (m, 1, H-9), 3.73 (s, 3, OMe), 3.50 (dd, 1, *J* = 8.5, 8.5, H-26), 2.92 (dd, 0.5  $\times$  1, *J* = 17.6, 3.0, H-20), 2.88 (dd, 0.5  $\times$  1, *J* = 17.6, 3.1, H-20), 2.79 (dd, 0.5  $\times$  1, *J* = 17.3, 3.6, H-8), 2.78 (dd, 0.5  $\times$  1, *J* = 17.3, 3.7, H-8), 2.71-2.62 (m, 1, H-19), 2.55 (dd, 1, *J* = 17.3, 11.2, H-8), 2.53 (dd, 0.5  $\times$  1, *J* = 17.6, 10.5, H-20), 2.49 (dd, 0.5  $\times$  1, *J* = 17.6, 10.5, H-20), 2.14 (dd, 1, *J* = 12.2, 5.4, H-16), 1.94 (dq, 1, *J* = 14.2, 7.3, H-23), 1.91 (dd, 1, *J* = 12.2, 12.2, H-16), 1.88-1.78 (m, 2, H-23, H-18), 1.63-1.48 (m, 3), 1.46-1.27 (m, 5), 1.33 (s, 0.5  $\times$  3, H-27), 1.32 (s,

0.5 × 3, H-27), 1.08 (d, 3,  $J = 6.3$ , H-25), 0.92 (t, 3,  $J = 6.8$ ), 0.83 (t, 0.5 × 3,  $J = 7.6$ , H-24), 0.82 (t, 0.5 × 3,  $J = 7.3$ , H-24);  $^{13}\text{C}$  NMR ( $\text{CDCl}_3$ ) 206.04 (0.5 × 1), 205.98 (0.5 × 1), 173.4, 170.5, 162.5, 149.8, 142.2, 112.17, 112.16, 110.5, 98.6, 75.2, 73.5, 67.2, 59.74 (0.5 × 1), 59.73 (0.5 × 1), 52.5, 48.2, 41.6, 39.4, 36.2, 34.30, 34.29, 31.8, 27.92 (0.5 × 1), 27.85 (0.5 × 1), 25.0, 22.6, 18.41 (0.5 × 1), 18.34 (0.5 × 1), 14.0, 12.0, 8.67 (0.5 × 1), 8.61 (0.5 × 1);  $^{13}\text{C}$  NMR ( $\text{CD}_3\text{OD}$ , 400 MHz) 208.82 (0.5 × 1), 208.76 (0.5 × 1), 174.8, 173.6, 163.4, 153.1, 142.3, 113.8, 110.7, 109.4, 101.1, 76.6, 74.16 (0.5 × 1), 76.13 (0.5 × 1), 69.5, 61.0, 52.9, 42.6, 40.48 (0.5 × 1), 40.46 (0.5 × 1), 37.4, 35.4, 35.0, 33.0, 28.90 (0.5 × 1), 28.83 (0.5 × 1), 26.2, 23.7, 18.89 (0.5 × 1), 18.78 (0.5 × 1), 14.4, 11.9, 8.98 (0.5 × 1), 8.94 (0.5 × 1) (a peak near  $\delta$  49.2 is obscured by the solvent peak); IR (neat) 3233, 2957, 2934, 2860, 1714, 1696. The  $^1\text{H}$  and  $^{13}\text{C}$  NMR spectral data in both  $\text{CDCl}_3$  and  $\text{CD}_3\text{OD}$  correspond to those of the natural product.<sup>1</sup>

**Methyl ( $\alpha S, 2S, 3S, 3'aS, 4S, 5'R$ )- $\alpha, 3$ -Dimethyl- $\alpha$ -ethyl-3', 3'a, 4, 5, 5', 6'-hexahydro-3-methyl- $\beta$ -oxo-5'-pentyl-8'-(2-propenyloxy)-9'-(2-propenyloxycarbonyl)-spiro[furan-2(3H), 2'-[2H]pyrano[2, 3, 4-de][1]benzopyran]-4-butanoate.** Aldol product **33** (20 mg, 32.5  $\mu\text{mol}$ ) in  $\text{CH}_2\text{Cl}_2$  (2 mL) was treated with Dess–Martin periodinane (28 mg, 66  $\mu\text{mol}$ ) at 0 °C. The suspension was allowed to warm to 25 °C and continued to stir for 12 h. The solvent was removed under reduced pressure at 25 °C. Flash chromatography on silica gel (10:1 hexanes/EtOAc) gave 16.9 mg (85%) of the allyl ether and allyl ester of berkelic acid:  $[\alpha]_{\text{D}}^{22} - 88.5$  ( $c$  0.73,  $\text{CHCl}_3$ );  $^1\text{H}$  NMR 6.24 (s, 1, H-4), 6.08-5.92 (m, 2), 5.40 (br d, 1,  $J = 17.7$ ), 5.36 (br d, 1,  $J = 17.1$ ), 5.27 (br d, 1,  $J = 10.4$ ), 5.23 (br d, 1,  $J = 10.4$ ), 4.85 (dd, 1,  $J = 13.4, 6.1$ ), 4.79 (dd, 1,  $J = 12.2, 5.5$ , H-15), 4.74 (dd, 1,  $J = 13.1, 5.8$ ), 4.51 (d, 2,  $J = 4.9$ ), 4.35 (dd, 1,  $J = 8.5, 8.5$ , H-26), 3.86-3.78 (m, 1, H-9), 3.74 (s, 3, OMe), 3.45 (dd, 1,  $J = 8.5, 8.5$ , H-26), 2.77 (dd, 1,  $J = 17.7, 3.4$ , H-20), 2.75 (dd, 1,  $J = 16.5, 3.7$ , H-8), 2.60 (dd, 1,  $J = 17.1, 11.0$ , H-8), 2.62-2.51 (m, 1, H-19), 2.43 (dd, 1,  $J = 17.7, 10.4$ , H-20), 2.14 (dd, 1,  $J = 12.2, 5.5$ , H-16), 1.96 (dd, 1,  $J = 12.2, 12.2$ , H-16), 2.02-1.91 (m, 1, H-23), 1.82 (dq, 1,  $J = 14.0, 7.3$ , H-23), 1.72-1.58 (m, 2), 1.58-1.46 (m, 2), 1.45-1.24 (m, 5), 1.33 (s, 3, H-27), 1.01 (d, 3,  $J = 6.7$ , H-25), 0.90 (t, 3,  $J = 6.4$ ), 0.84 (t, 3,  $J = 7.3$ );  $^{13}\text{C}$  NMR 206.6, 173.5, 165.5, 155.6, 148.9, 135.8, 132.9, 132.2, 118.5,

117.1, 114.5, 109.7, 108.4, 104.4, 75.3, 72.8, 69.4, 68.0, 65.7, 59.7, 52.4, 48.4, 42.0, 38.9, 36.3, 34.42, 34.39, 31.8, 27.9, 25.1, 22.6, 18.4, 14.0, 11.6, 8.6; IR (neat) 2957, 2933, 2860, 1739, 1731, 1715; HRMS (EI) calcd for C<sub>35</sub>H<sub>48</sub>O<sub>9</sub> (M<sup>+</sup>) 612.3298, found 612.3300.

**Methyl (αR,2S,3S,3'aS,4S,5'R)-α,3-Dimethyl-α-ethyl-3',3'a,4,5,5',6'-hexahydro-3-methyl-β-oxo-5'-pentyl-8'-(2-propenyloxy)-9'-(2-propenyloxycarbonyl)-spiro[furan-2(3H),2'-[2H]pyrano[2,3,4-de][1]benzopyran]-4-butanoate.** An identical reaction with **34** (20.2 mg, 32.9 μmol) afforded 15.6 mg (77%) of the allyl ether and allyl ester of 22-*epi*-berkelic acid: [α]<sub>D</sub><sup>22</sup> –91.9 (*c* 0.70, CHCl<sub>3</sub>); <sup>1</sup>H NMR 6.23 (s, 1, H-4), 6.08-5.92 (m, 2), 5.40 (br d, 1, *J* = 17.7), 5.36 (br d, 1, *J* = 17.1), 5.27 (br d, 1, *J* = 10.4), 5.23 (d, 1, *J* = 10.4), 4.85 (dd, 1, *J* = 13.4, 6.1), 4.79 (dd, 1, *J* = 12.2, 5.5, H-15), 4.74 (dd, 1, *J* = 13.1, 5.8), 4.51 (d, 2, *J* = 4.9), 4.35 (dd, 1, *J* = 8.5, 8.5, H-26), 3.86-3.78 (m, 1, H-9), 3.74 (s, 3, OMe), 3.45 (dd, 1, *J* = 8.5, 8.5, H-26), 2.81 (dd, 1, *J* = 17.7, 3.1, H-20), 2.75 (dd, 1, *J* = 17.1, 3.7, H-8), 2.60 (dd, 1, *J* = 17.1, 11.0, H-8), 2.60-2.50 (m, 1, H-19), 2.35 (dd, 1, *J* = 17.7, 10.4, H-20), 2.14 (dd, 1, *J* = 12.2, 4.9, H-16), 1.96 (dd, 1, *J* = 12.2, 12.2, H-16), 2.02-1.91 (m, 1, H-23), 1.82 (dq, 1, *J* = 14.7, 7.3, H-23), 1.72-1.58 (m, 2), 1.58-1.46 (m, 2), 1.45-1.24 (m, 5), 1.34 (s, 3, H-27), 1.00 (d, 3, *J* = 6.7, H-25), 0.90 (t, 3, *J* = 6.7), 0.83 (t, 3, *J* = 7.3); <sup>13</sup>C NMR 206.5, 173.5, 165.5, 155.6, 148.9, 135.8, 132.9, 132.2, 118.5, 117.2, 114.5, 109.7, 108.4, 104.4, 75.3, 72.8, 69.4, 68.0, 65.7, 59.7, 52.4, 48.5, 42.0, 38.9, 36.3, 34.42, 34.39, 31.8, 27.8, 25.1, 22.6, 18.3, 14.0, 11.6, 8.6; IR (neat) 2957, 2934, 2860, 1739, 1732, 1715; HRMS (EI) calcd for C<sub>35</sub>H<sub>48</sub>O<sub>9</sub> (M<sup>+</sup>) 612.3298, found 612.3296.

**Methyl (2S,3R,5R)- and (2R,3S,5R)-2-Ethyl-3-hydroxy-2,5,9-trimethyl-8-decenoate (42 and 43).** *n*-BuLi (2.1 mL, 1.6 M in hexane, 3.36 mmol) was added dropwise to a solution of diisopropylamine (0.47 mL, 3.33 mmol) in THF (2 mL) under N<sub>2</sub> at 0 °C. The resulting solution was stirred at 0 °C for 30 min and cooled to –78 °C. A solution of methyl 2-methylbutanoate (0.44 mL, 3.33 mmol) in THF (2 mL) was added dropwise to the reaction mixture and the reaction was stirred at –78 °C for 1 h to generate enolate **38**. A solution of (*R*)-(+)-citronellal ((*R*)-**37**) (0.27 mL, 1.33 mmol) in THF (2 mL) was added dropwise to the reaction mixture and the reaction was slowly warmed up to 25 °C over 2 h. The reaction was quenched with saturated

NH<sub>4</sub>Cl (10 mL) and extracted with ether (3 × 5 mL). The combined ether extracts were dried (Na<sub>2</sub>SO<sub>4</sub>) and concentrated to give 335 mg of crude **39**. Flash chromatography on silica gel (10:1 hexanes/EtOAc) gave 249.6 g (70%) of methyl (5*R*)-5,9-dimethyl-2-ethyl-3-hydroxy-8-decenoate (**39**) as a mixture of four diastereomers: <sup>1</sup>H NMR 5.13-5.04 (br, 1), 3.80-3.72 (m, 1), 3.71-3.68 (three singlets, 3), 2.19-1.06 (m, 7), 1.68 (3), 1.60 (3), 1.12-1.10 (four singlets, 3), 0.96-0.80 (m, 6).

*n*-BuLi (0.275 mL, 1.6 M in hexane, 0.44 mmol) was added dropwise to a solution of diisopropylamine (62 μL, 0.44 mmol) in THF (0.5 mL) under N<sub>2</sub> at 0 °C. The resulting solution was stirred at 0 °C for 30 min and cooled to -50 °C. A solution of **39** (51 mg, 0.2 mmol) in THF (0.5 mL) was added dropwise to the reaction mixture. The resulting solution was stirred at -50 °C for 30 min and at -20 °C for 1 h. A solution of MeI (25 μL, 0.61 mmol) and HMPA (0.21 mL, 1.2 mmol) in THF (0.3 mL) was added dropwise to the reaction mixture. The solution was stirred at -20 °C for 2 h and slowly warmed up to 25 °C over 1 h. The reaction mixture was quenched with saturated NH<sub>4</sub>Cl (4 mL) and extracted with ether (4 × 4 mL). The combined ether extracts were dried (MgSO<sub>4</sub>) and concentrated. Flash chromatography on silica gel (25:1 hexanes/EtOAc) gave 8.8 mg (16%) of 1:1 mixture of **42** and **43**.

**Methyl (2*S*,3*R*,5*R*)-, (2*R*,3*R*,5*R*)-, (2*R*,3*S*,5*R*)-, and (2*S*,3*S*,5*R*)-2-Ethyl-3-hydroxy-2,5,9-trimethyl-8-decenoate (42, 43, 44, and 45, respectively)**. To a solution of *N*-Ts-(*S*)-valine ((*S*)-**32**)<sup>22</sup> (81 mg, 0.3 mmol) in dry CH<sub>2</sub>Cl<sub>2</sub> (1 mL) was added BH<sub>3</sub>•THF (0.3 mL, 1 M solution in THF, 0.3 mmol) by syringe over 3 min under N<sub>2</sub> at 0 °C. The solution was stirred for 30 min at 0 °C and additionally for 30 min at 25 °C. The solution was cooled -78 °C and a solution of (*R*)-(+)-citronellal ((*R*)-**37**) (16.3 μL, 90 μmol) in CH<sub>2</sub>Cl<sub>2</sub> (0.5 mL) was added dropwise over 3 min. After stirring for 5 min, silyl ketene acetal **19** (47 mg, 0.3 mmol) in CH<sub>2</sub>Cl<sub>2</sub> (0.5 mL) was added dropwise over 3 min. The reaction mixture was stirred for 4 h at -78 °C and quenched with 1 M aqueous HCl (3 mL). The mixture was allowed to warm to 25 °C and the aqueous layer was extracted with CH<sub>2</sub>Cl<sub>2</sub> (4 × 3 mL). The combined organic layers were washed with saturated NaHCO<sub>3</sub> (2 × 6 mL), dried (MgSO<sub>4</sub>) and concentrated to yield



21.9 mg of crude aldol product. Flash chromatography (25:1 hexanes/EtOAc) gave 9.1 mg (38%) of **42** contaminated with 15% of **43**, followed by 10.0 mg (41%) of **44** contaminated with 15% of **45**.

Data for **42**:  $^1\text{H}$  NMR 5.13-5.06 (m, 1), 3.789 (br d, 1,  $J = 9.8$ ), 3.685 (s, 3), 2.07-1.85 (m, 3, including OH), 1.80 (dq, 1,  $J = 14.0, 7.3$ ), 1.72-1.64 (m, 1), 1.68 (s, 3), 1.61 (s, 3), 1.54 (dq, 1,  $J = 13.4, 7.3$ ), 1.52-1.42 (m, 1), 1.33-1.16 (m, 3), 1.113 (s, 3), 0.94 (d, 3,  $J = 6.7$ ), 0.85 (t, 3,  $J = 7.3$ );  $^{13}\text{C}$  NMR 177.05, 131.20, 124.78, 74.09, 51.62, 51.43, 40.16, 35.52, 29.60, 28.57, 25.72, 25.22, 20.76, 17.65, 16.22, 9.02; HRMS (EI) calcd for  $\text{C}_{16}\text{H}_{30}\text{O}_3$  ( $\text{M}^+$ ) 270.2195, found 270.2192.

Data for **44**:  $^1\text{H}$  NMR 5.14-5.06 (m, 1), 3.755 (br, 1), 3.712 (s, 3), 2.34-2.26 (br, 1, OH), 2.09-1.96 (m, 1), 2.00-1.86 (m, 1), 1.74 (dq, 1,  $J = 14.0, 7.3$ ), 1.76-1.68 (m, 1), 1.68 (s, 3), 1.61 (s, 3), 1.52 (dq, 1,  $J = 13.4, 7.3$ ), 1.54-1.44 (m, 1), 1.37-1.22 (m, 2), 1.20-1.10 (m, 1), 1.095 (s, 3), 0.95 (d, 3,  $J = 6.7$ ), 0.83 (t, 3,  $J = 7.3$ );  $^{13}\text{C}$  NMR 177.72, 131.19, 124.79, 73.47, 51.73, 51.61, 39.23, 35.61, 29.50, 29.41, 25.72, 25.32, 20.82, 17.65, 16.53, 8.87; HRMS (EI) calcd for  $\text{C}_{16}\text{H}_{30}\text{O}_3$  ( $\text{M}^+$ ) 270.2195, found 270.2197.

An identical reaction from *N*-Ts-(*R*)-valine ((*R*)-**32**) afforded 5.0 mg (21%) of **43** contaminated with 15% of **42** and 4.4 mg (18%) of **45** contaminated with 15% of **44**.

Data for **43**:  $^1\text{H}$  NMR 5.13-5.06 (m, 1), 3.784 (br d, 1,  $J = 10.4$ ), 3.687 (s, 3), 2.08-1.91 (m, 3, including OH), 1.80 (dq, 1,  $J = 14.0, 7.3$ ), 1.73-1.64 (m, 1), 1.68 (s, 3), 1.60 (s, 3), 1.55 (dq, 1,  $J = 14.0, 7.3$ ), 1.47-1.38 (m, 1), 1.34-1.16 (m, 3), 1.119 (s, 3), 0.89 (d, 3,  $J = 6.7$ ), 0.86 (t, 3,  $J = 7.3$ );  $^{13}\text{C}$  NMR 177.07, 131.15, 124.70, 73.73, 51.60, 51.36, 39.82, 38.19, 29.10, 28.56, 25.70, 25.51, 18.68, 17.64, 16.25, 8.97; HRMS (EI) calcd for  $\text{C}_{16}\text{H}_{30}\text{O}_3$  ( $\text{M}^+$ ) 270.2195, found 270.2194.

Data for **45**:  $^1\text{H}$  NMR 5.13-5.06 (m, 1), 3.760 (br d, 1,  $J = 10.4$ ), 3.712 (s, 3), 2.36-2.27 (m, 1, OH), 2.07-1.90 (m, 2), 1.74 (dq, 1,  $J = 14.0, 7.3$ ), 1.78-1.68 (m, 1), 1.68 (s, 3), 1.60 (s, 3), 1.53 (dq, 1,  $J = 13.4, 7.3$ ), 1.38-1.18 (m, 1), 1.18-1.06 (m, 3), 1.099 (s, 3), 0.90 (d, 3,  $J = 6.7$ ), 0.83 (t, 3,  $J = 7.3$ );  $^{13}\text{C}$  NMR 177.74, 131.14, 124.72, 73.05, 51.70, 51.49, 38.80, 38.29, 29.41,

28.92, 25.70, 25.54, 18.75, 17.64, 16.58, 8.82; HRMS (EI) calcd for C<sub>16</sub>H<sub>30</sub>O<sub>3</sub> (M<sup>+</sup>) 270.2195, found 270.2190.

**Methyl (2*S*,5*R*)-2-Ethyl-2,5,9-trimethyl-3-oxo-8-decenoate (46).** Dess–Martin periodinane (15.7 mg, 37 μmol) was added to a solution of **42** (5.0 mg, 18.5 μmol) in CH<sub>2</sub>Cl<sub>2</sub> (1 mL) at 25 °C. The suspension was stirred at 25 °C for 12 h. The solvent was removed under reduced pressure at 25 °C. Flash chromatography on silica gel (40:1 hexanes/EtOAc) gave 4.3 mg (87%) of **46**: <sup>1</sup>H NMR 5.10-5.04 (m, 1), 3.71 (s, 3), 2.37 (dd, 1, *J* = 17.1, 5.5), 2.26 (dd, 1, *J* = 17.7, 7.9), 2.10-2.00 (m, 1), 2.00-1.89 (m, 3), 1.79 (dq, 1, *J* = 14.0, 7.3), 1.68 (s, 3), 1.59 (s, 3), 1.32-1.24 (m, 1), 1.30 (s, 3), 1.20-1.08 (m, 1), 0.85 (d, 3, *J* = 6.7), 0.82 (t, 3, *J* = 7.3); <sup>13</sup>C NMR 207.2, 173.6, 131.4, 124.3, 60.2, 52.2, 45.6, 36.7, 28.2, 27.6, 25.7, 25.5, 19.5, 18.1, 17.6, 8.6; HRMS (EI) calcd for C<sub>16</sub>H<sub>28</sub>O<sub>3</sub> (M<sup>+</sup>) 268.2038, found 268.2031.

An identical reaction with **45** also afforded **46** (89%).

**Methyl (2*R*,5*R*)-2-Ethyl-2,5,9-trimethyl-3-oxo-8-decenoate (47).** An identical reaction with **44** afforded **47** (83%): <sup>1</sup>H NMR 5.11-5.04 (m, 1), 3.71 (s, 3), 2.41 (dd, 1, *J* = 17.1, 5.5), 2.24 (dd, 1, *J* = 17.7, 7.9), 2.11-2.00 (m, 1), 2.00-1.89 (m, 3), 1.78 (dq, 1, *J* = 14.0, 7.3), 1.68 (s, 3), 1.59 (s, 3), 1.33-1.24 (m, 1), 1.31 (s, 3), 1.19-1.08 (m, 1), 0.86 (d, 3, *J* = 6.7), 0.83 (t, 3, *J* = 7.3); <sup>13</sup>C NMR 207.2, 173.6, 131.4, 124.3, 60.1, 52.2, 45.6, 36.7, 28.1, 27.6, 25.7, 25.5, 19.5, 18.2, 17.6, 8.6; HRMS (EI) calcd for C<sub>16</sub>H<sub>28</sub>O<sub>3</sub> (M<sup>+</sup>) 268.2038, found 268.2041.

An identical reaction with **43** also afforded **47** (84%).

**(4*R*,5*R*)-4-((2*R*)-2,6-Dimethyl-5-hepten-1-yl)-5-ethyl-2,2,5-trimethyl-1,3-dioxane (48).** To a stirred suspension of lithium aluminum hydride (44.5 mg, 1.17 mmol) in ether (1.5 mL) was added a solution of β-hydroxy ester **42** (78.5 mg, 0.29 mmol) in ether (3 mL) under N<sub>2</sub> at 25 °C. The suspension was stirred for 3 h and quenched by slow addition of H<sub>2</sub>O (1 mL). The white precipitate was filtered off through a pad of Celite and rinsed with EtOAc (6 × 5 mL). The organic layer was washed with brine (5 mL), dried (MgSO<sub>4</sub>), and concentrated to give 63.2 mg of diol.

A solution of the diol and TsOH•H<sub>2</sub>O (6.0 mg, 32 μmol) in 2,2-dimethoxypropane (2.5 mL) was stirred under N<sub>2</sub> for 40 min. The reaction mixture was diluted with ether (20 mL) and washed with saturated NaHCO<sub>3</sub> (3 × 5 mL). The organic layer was dried (Na<sub>2</sub>SO<sub>4</sub>) and concentrated. Flash chromatography on silica gel (40:1 hexanes/EtOAc) gave 64.4 mg (79%) of **48**: <sup>1</sup>H NMR 5.13-5.06 (m, 1), 3.63 (dd, 1, *J* = 8.5, 2.4), 3.58 (d, 1, *J* = 11.6), 3.40 (d, 1, *J* = 11.6), 2.06-1.88 (m, 2), 1.93 (dq, 1, *J* = 14.0, 7.3), 1.69 (s, 3), 1.61 (s, 3), 1.63-1.51 (m, 1), 1.45-1.37 (m, 1), 1.42 (s, 3), 1.37 (s, 3), 1.32-1.21 (m, 2), 1.15 (dq, 1, *J* = 14.0, 6.7), 1.10-1.00 (m, 1), 0.91 (d, 3, *J* = 6.7), 0.85 (t, 3, *J* = 7.6), 0.62 (s, 3); <sup>13</sup>C NMR 131.1, 124.9, 98.3, 76.4, 67.2, 35.8, 35.7, 35.2, 29.6, 29.2, 25.7, 25.2, 21.4, 20.6, 18.9, 18.4, 17.6, 7.8. A 2D NOESY experiment showed NOEs from the three ring protons at δ 3.63, 3.58, and 3.40 to the methyl singlet at δ 0.62. Only the equatorial ring proton at δ 3.58 showed an NOE to the methyl triplet of the ethyl group at δ 0.91 and one methylene proton of the ethyl group at δ 1.93; HRMS (EI) calcd for C<sub>18</sub>H<sub>34</sub>O<sub>2</sub> (M<sup>+</sup>) 282.2559, found 282.2554.

**(4*R*,5*S*)-4-((2*R*)-2,6-Dimethyl-5-hepten-1-yl)-5-ethyl-2,2,5-trimethyl-1,3-dioxane (49)**. An identical series of reactions with **44** (63.5 mg, 0.24 mmol) afforded 53.7 mg (81%) of **49**: <sup>1</sup>H NMR 5.13-5.06 (m, 1), 3.69-3.62 (m, 2), 3.38 (d, 1, *J* = 11.6), 2.06-1.86 (m, 2), 1.68 (s, 3), 1.61 (s, 3), 1.64-1.55 (m, 1), 1.45-1.37 (m, 1), 1.40 (s, 3), 1.38 (s, 3), 1.30-1.19 (m, 3), 1.13 (dq, 1, *J* = 14.0, 7.3), 1.10-1.00 (m, 1), 0.97 (s, 3), 0.91 (d, 3, *J* = 6.7), 0.80 (t, 3, *J* = 7.3); <sup>13</sup>C NMR 131.1, 124.9, 98.2, 74.0, 69.9, 36.0, 35.7, 35.2, 29.4, 29.0, 28.4, 25.7, 25.2, 20.6, 19.1, 17.6, 15.7, 7.2; <sup>1</sup>H NMR (benzene-*d*<sub>6</sub>) 5.29-5.20 (m, 1), 3.61 (br d, 1, *J* = 9.8), 3.52 (d, 1, *J* = 11.6), 3.38 (d, 1, *J* = 11.6), 2.16-1.99 (m, 2), 1.86-1.4 (m, 1), 1.70 (s, 3), 1.59 (s, 3), 1.59-1.49 (m, 1), 1.50 (s, 3), 1.39-1.29 (m, 1), 1.34 (s, 3), 1.23-1.10 (m, 2), 1.04 (s, 3), 0.97 (d, 3, *J* = 6.7), 1.09-0.99 (m, 1), 0.89 (dq, 1, *J* = 14.0, 7.3), 0.62 (t, 3, *J* = 7.6); <sup>13</sup>C NMR (benzene-*d*<sub>6</sub>) 131.3, 125.9, 98.7, 74.8, 70.2, 36.9, 36.7, 35.7, 30.2, 29.9, 29.0, 26.3, 26.2, 21.3, 19.6, 18.1, 16.4, 7.7; HRMS (EI) calcd for C<sub>18</sub>H<sub>34</sub>O<sub>2</sub> (M<sup>+</sup>) 282.2559, found 282.2563.

A 2D NOESY (run in benzene-*d*<sub>6</sub> because two ring protons overlapped in CDCl<sub>3</sub>) experiment showed NOEs from all three ring protons at δ 3.61, 3.52, and 3.38 to the methyl

triplet of the ethyl group at  $\delta$  0.62, the ethyl methylene group multiplet at  $\delta$  0.89, and the ethyl methylene group multiplet at  $\delta$  1.09-0.99. Only the equatorial ring proton at  $\delta$  3.38 showed an NOE to the methyl singlet at  $\delta$  1.04. It is interesting to note that H-6e is downfield at  $\delta$  3.69-3.62 from H-6a at  $\delta$  3.38 in  $\text{CDCl}_3$ , but upfield at  $\delta$  3.38 from H-6a at  $\delta$  3.52 in  $\text{C}_6\text{D}_6$  as has been previously observed.<sup>30</sup>

### References

30. Pihlaja, K.; Äyräs, P. *Acta Chem. Scand.* **1970**, *24*, 531-549.

**Table S1. Comparison of the  $^{13}\text{C}$  and  $^1\text{H}$  NMR Spectral Data Reported for Citronellal-derived Hydroxy Esters 42–45.**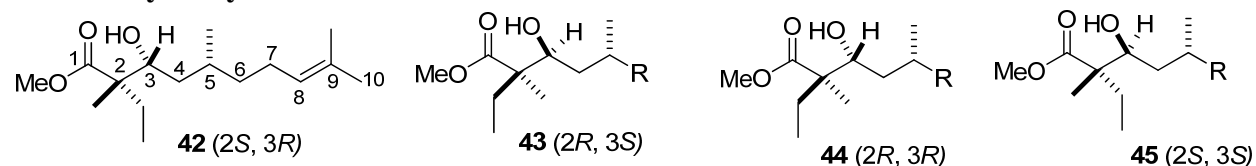

C (Roman)<sup>a</sup>    **42**    **43**    **44**    **45**  
*H(Italics)*<sup>a</sup>    (2*S*,3*R*)(2*R*,3*S*)(2*R*,3*R*)(2*S*,3*S*)

|                         |             |             |             |             |                                                                             |
|-------------------------|-------------|-------------|-------------|-------------|-----------------------------------------------------------------------------|
| 1                       | 177.05      | 177.07      | 177.72      | 177.74      | (2 <i>R</i> ,3 <i>R</i> ) and (2 <i>S</i> ,3 <i>S</i> ) 0.7 ppm downfield   |
| 2                       | 51.6*       | 51.6*       | 51.73*      | 51.70*      |                                                                             |
| 2-Me                    | 16.21       | 16.25       | 16.53       | 16.58       | (2 <i>R</i> ,3 <i>R</i> ) and (2 <i>S</i> ,3 <i>S</i> ) 0.3 ppm downfield   |
| 2-Me                    | <i>1.11</i> | <i>1.12</i> | <i>1.09</i> | <i>1.10</i> | (2 <i>R</i> ,3 <i>R</i> ) and (2 <i>S</i> ,3 <i>S</i> ) 0.02 ppm upfield    |
| 2-Et (CH <sub>2</sub> ) | 28.57       | 28.56       | 29.41       | 29.41       | (2 <i>R</i> ,3 <i>R</i> ) and (2 <i>S</i> ,3 <i>S</i> ) 0.85 ppm downfield  |
| 2-Et (CH <sub>3</sub> ) | 9.0         | 9.0         | 8.87        | 8.82        | (2 <i>R</i> ,3 <i>R</i> ) and (2 <i>S</i> ,3 <i>S</i> ) 0.15 ppm upfield    |
| 2-Et (CH <sub>3</sub> ) | <i>0.85</i> | <i>0.86</i> | <i>0.83</i> | <i>0.83</i> | (2 <i>R</i> ,3 <i>R</i> ) and (2 <i>S</i> ,3 <i>S</i> ) 0.025 ppm upfield   |
| OMe                     | 51.4*       | 51.4*       | 51.6*       | 51.5*       |                                                                             |
| OMe                     | <i>3.69</i> | <i>3.69</i> | <i>3.71</i> | <i>3.71</i> | (2 <i>R</i> ,3 <i>R</i> ) and (2 <i>S</i> ,3 <i>S</i> ) 0.02 ppm downfield  |
| 3                       | 74.09       | 73.73       | 73.47       | 73.05       | (2 <i>R</i> ,3 <i>R</i> ) and (2 <i>S</i> ,3 <i>S</i> ) 0.6-0.7 ppm upfield |
| 3                       | <i>3.79</i> | <i>3.78</i> | <i>3.76</i> | <i>3.76</i> | (2 <i>R</i> ,3 <i>R</i> ) and (2 <i>S</i> ,3 <i>S</i> ) 0.02 ppm upfield    |
| 4                       | 40.16       | 39.82       | 39.23       | 38.80       | (2 <i>R</i> ,3 <i>R</i> ) and (2 <i>S</i> ,3 <i>S</i> ) 0.9-1.0 ppm upfield |
| 5                       | 29.60       | 29.10       | 29.50       | 28.92       | (3 <i>R</i> ) 0.5 ppm downfield                                             |
| 5-Me                    | 20.76       | 18.68       | 20.82       | 18.75       | (3 <i>R</i> ) 2.1 ppm downfield                                             |
| 5-Me                    | <i>0.94</i> | <i>0.89</i> | <i>0.95</i> | <i>0.90</i> | (3 <i>R</i> ) 0.05 ppm downfield                                            |
| 6                       | 35.52       | 38.19       | 35.61       | 38.29       | (3 <i>R</i> ) 2.7 ppm upfield                                               |
| 7                       | 25.2        | 25.5        | 25.3        | 25.5        |                                                                             |
| 8                       | 124.8       | 124.7       | 124.8       | 124.7       |                                                                             |
| 9                       | 131.2       | 131.2       | 131.2       | 131.1       |                                                                             |
| 10                      | 25.7        | 25.7        | 25.7        | 25.7        |                                                                             |
| 9-Me                    | 17.6        | 17.6        | 17.6        | 17.6        |                                                                             |

\* Data for C-2 and the OMe group may be switched. a)  $^{13}\text{C}$  NMR data are in roman type and  $^1\text{H}$  NMR data are in italic type.

**Table S2. Comparison of the  $^{13}\text{C}$  and  $^1\text{H}$  NMR Spectral Data Reported for Berkelic Acid Intermediates **33** and **34**.**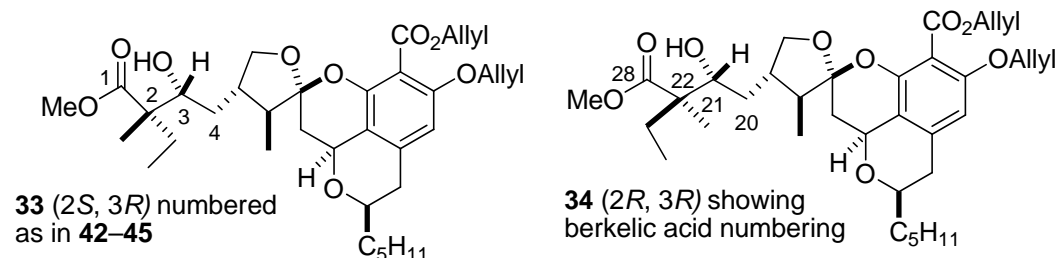

| C (Roman) <sup>a</sup>         | <b>33</b>        | <b>34</b>        |                                      |
|--------------------------------|------------------|------------------|--------------------------------------|
| <i>H (Italics)<sup>a</sup></i> | ( <i>2S,3R</i> ) | ( <i>2R,3R</i> ) |                                      |
| 1                              | 176.94           | 177.58           | ( <i>2R,3R</i> ) 0.64 ppm downfield  |
| 2-Me                           | 16.75            | 16.94            | ( <i>2R,3R</i> ) 0.19 ppm downfield  |
| 2-Me                           | <i>1.14</i>      | <i>1.13</i>      | ( <i>2R,3R</i> ) 0.01 ppm upfield    |
| 2-Et (CH <sub>2</sub> )        | 28.38            | 29.60            | ( <i>2R,3R</i> ) 1.22 ppm downfield  |
| 2-Et (CH <sub>3</sub> )        | 8.99             | 8.80             | ( <i>2R,3R</i> ) 0.19 ppm upfield    |
| 2-Et (CH <sub>3</sub> )        | <i>0.87</i>      | <i>0.85</i>      | ( <i>2R,3R</i> ) 0.02 ppm upfield    |
| OMe                            | 3.709            | 3.726            | ( <i>2R,3R</i> ) 0.017 ppm downfield |
| 3                              | 76.22            | 75.49            | ( <i>2R,3R</i> ) 0.73 ppm upfield    |
| 3                              | 3.73             | 3.70             | ( <i>2R,3R</i> ) 0.03 ppm upfield    |
| 4                              | 35.31            | 34.57            | ( <i>2R,3R</i> ) 0.74 ppm upfield    |

a)  $^{13}\text{C}$  NMR data are in roman type and  $^1\text{H}$  NMR data are in italic type.

**One Dose Mean Graph**

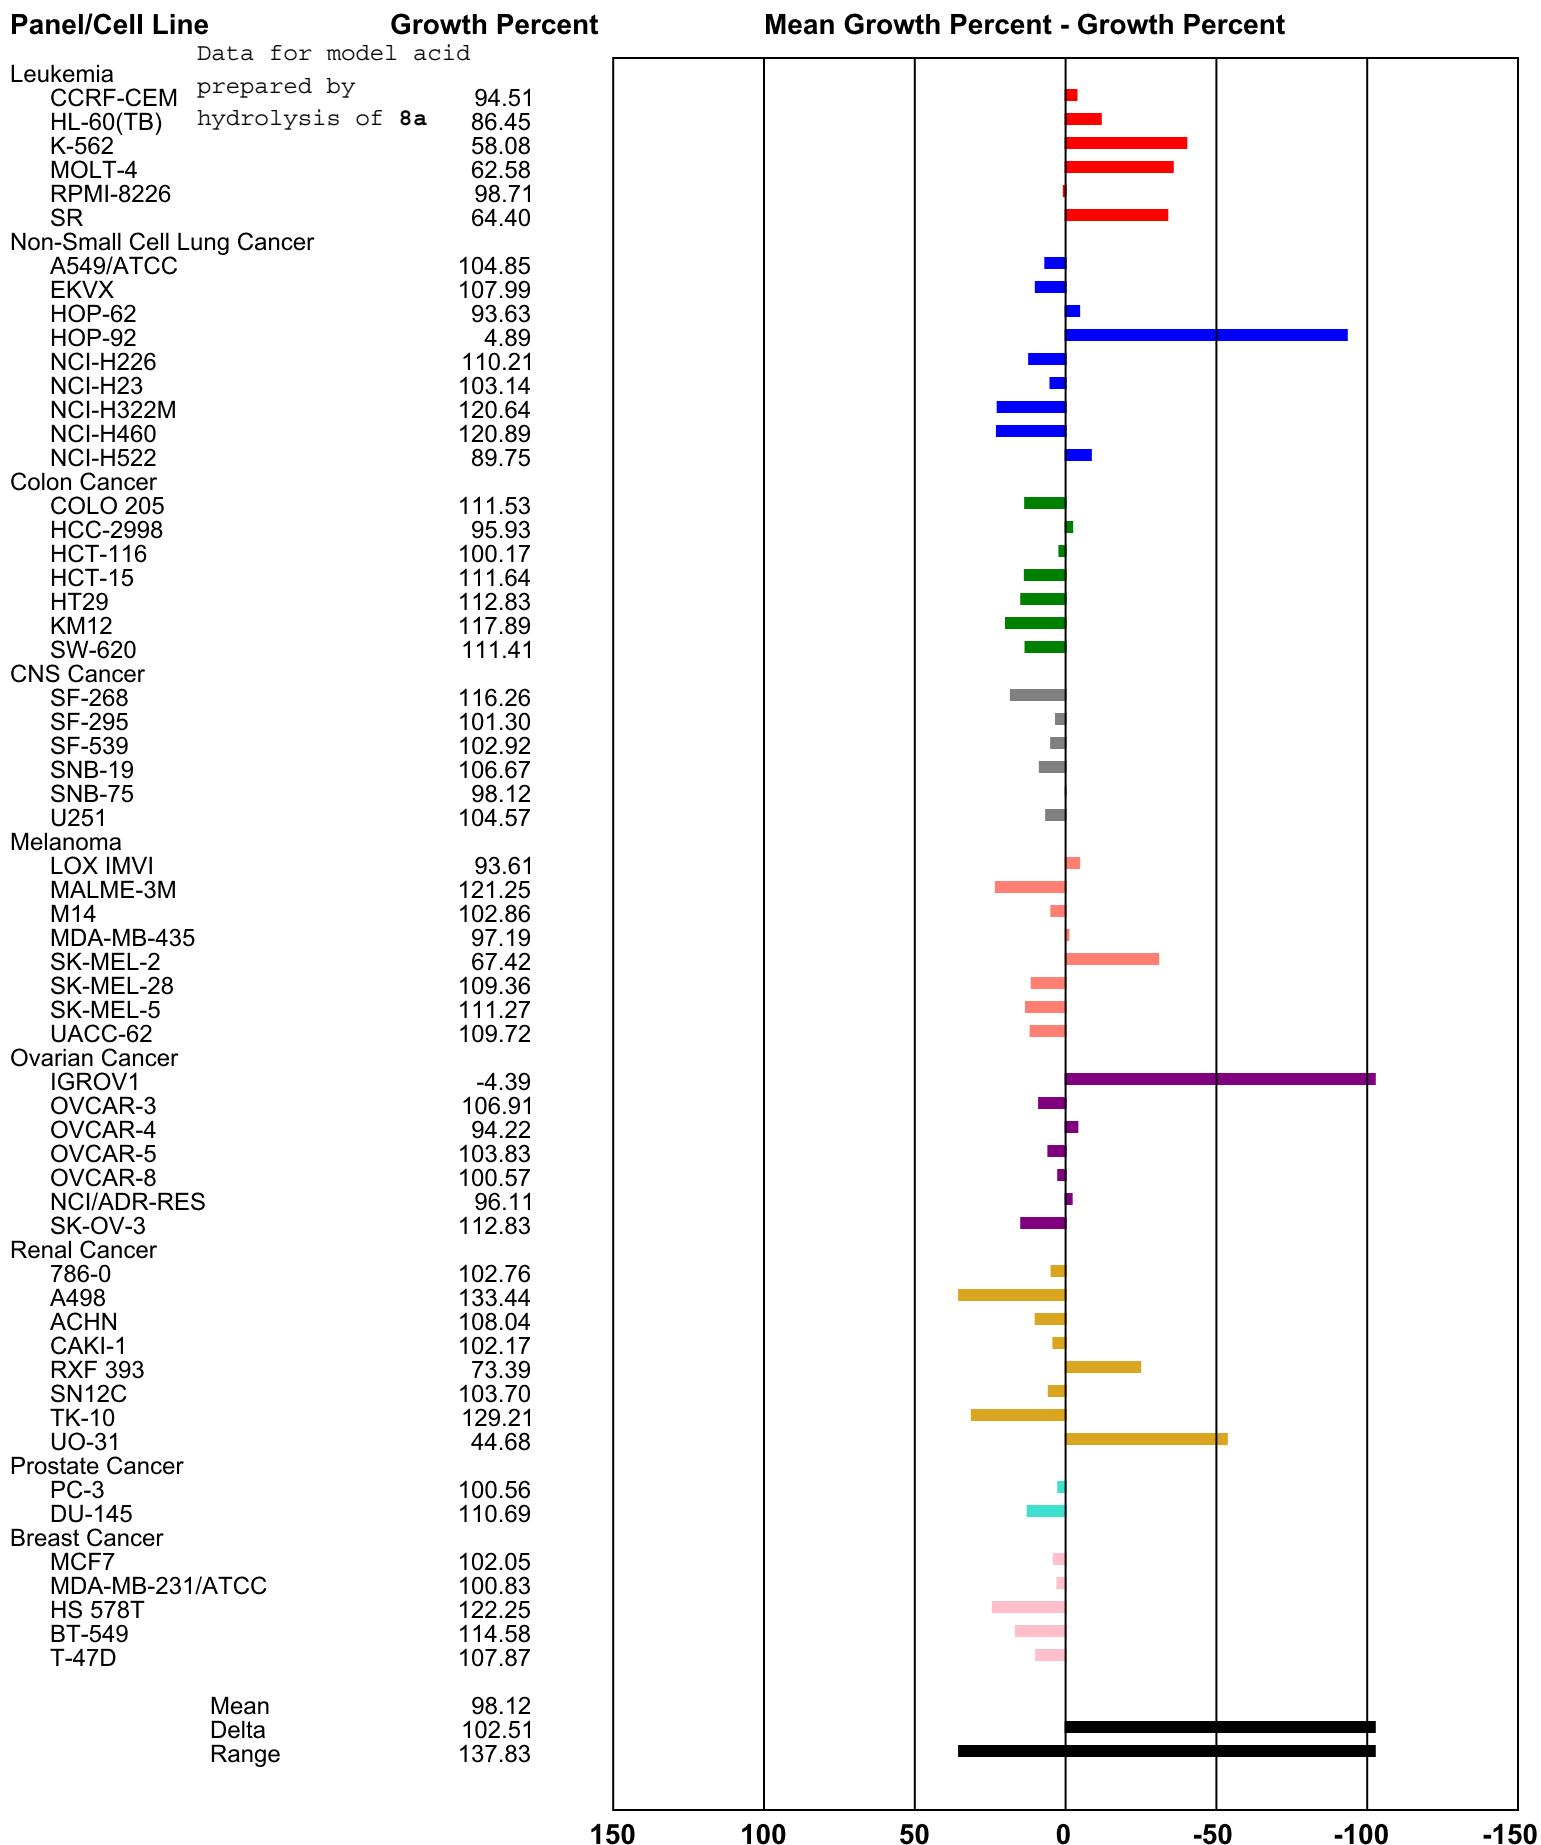

# Developmental Therapeutics Program

NSC: 749689 / 1

Conc: 1.00E-5 Molar

Test Date: Feb 17, 2009

Wu, Zhou, and Snider  
**One Dose Mean Graph**

(-)-Berkelic Acid

S24

Experiment ID: 0902OS70

Report Date: Mar 10, 2009

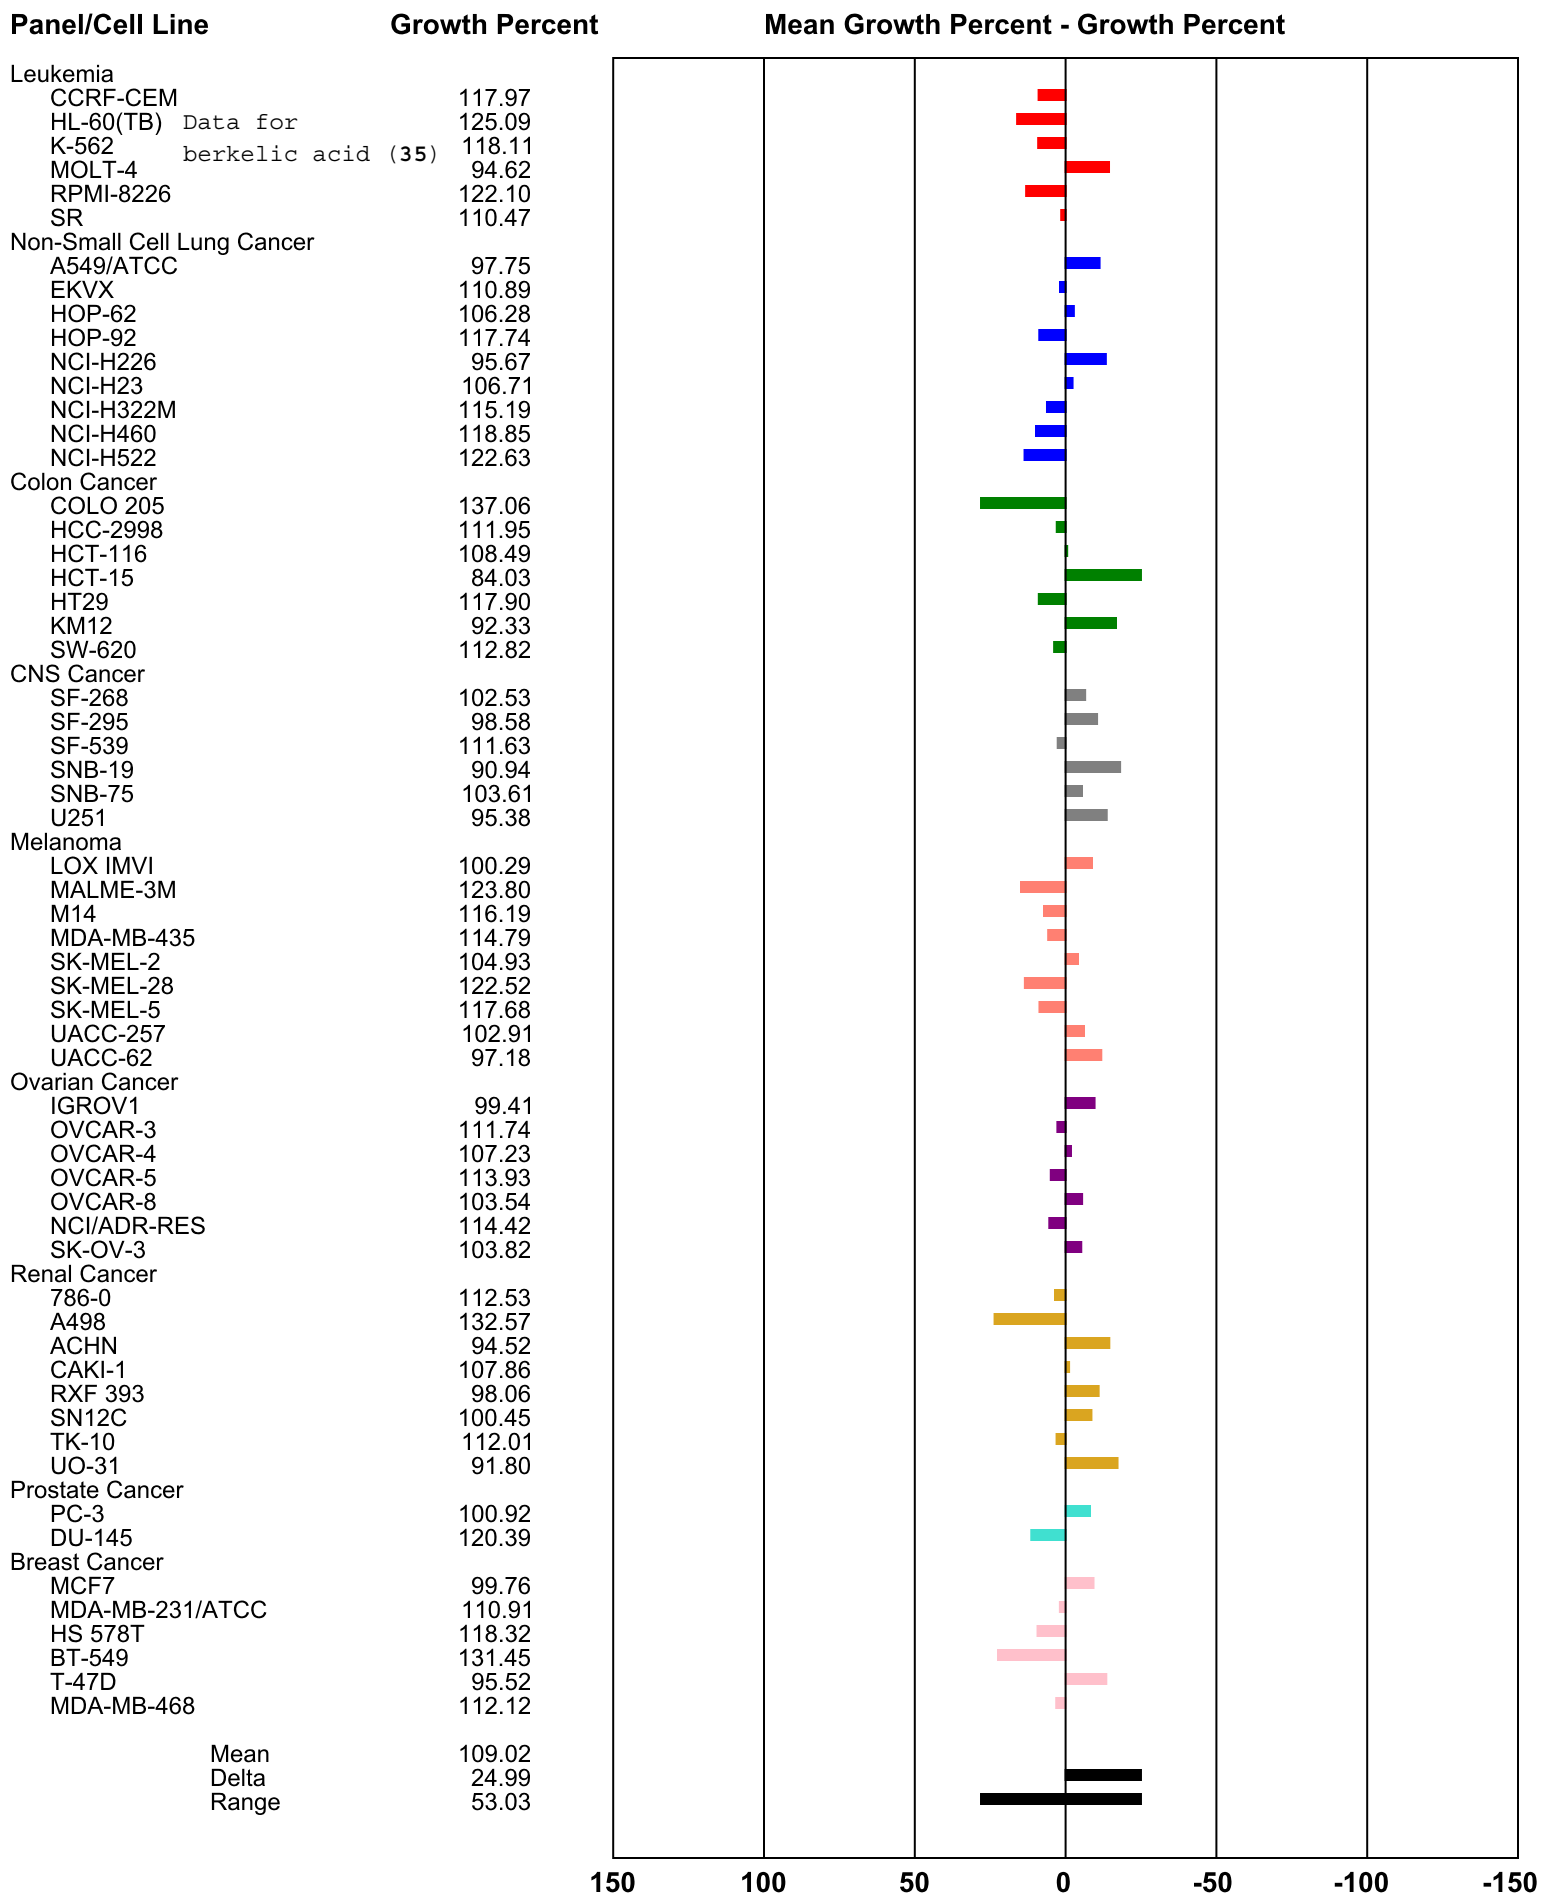

150 100 50 0 -50 -100 -150



# Developmental Therapeutics Program

NSC: 749690 / 1

Conc: 1.00E-5 Molar

Test Date: Feb 17, 2009

Wu, Zhou, and Snider

(-)-Berkelic Acid

S25

## One Dose Mean Graph

Experiment ID: 0902OS70

Report Date: Mar 10, 2009

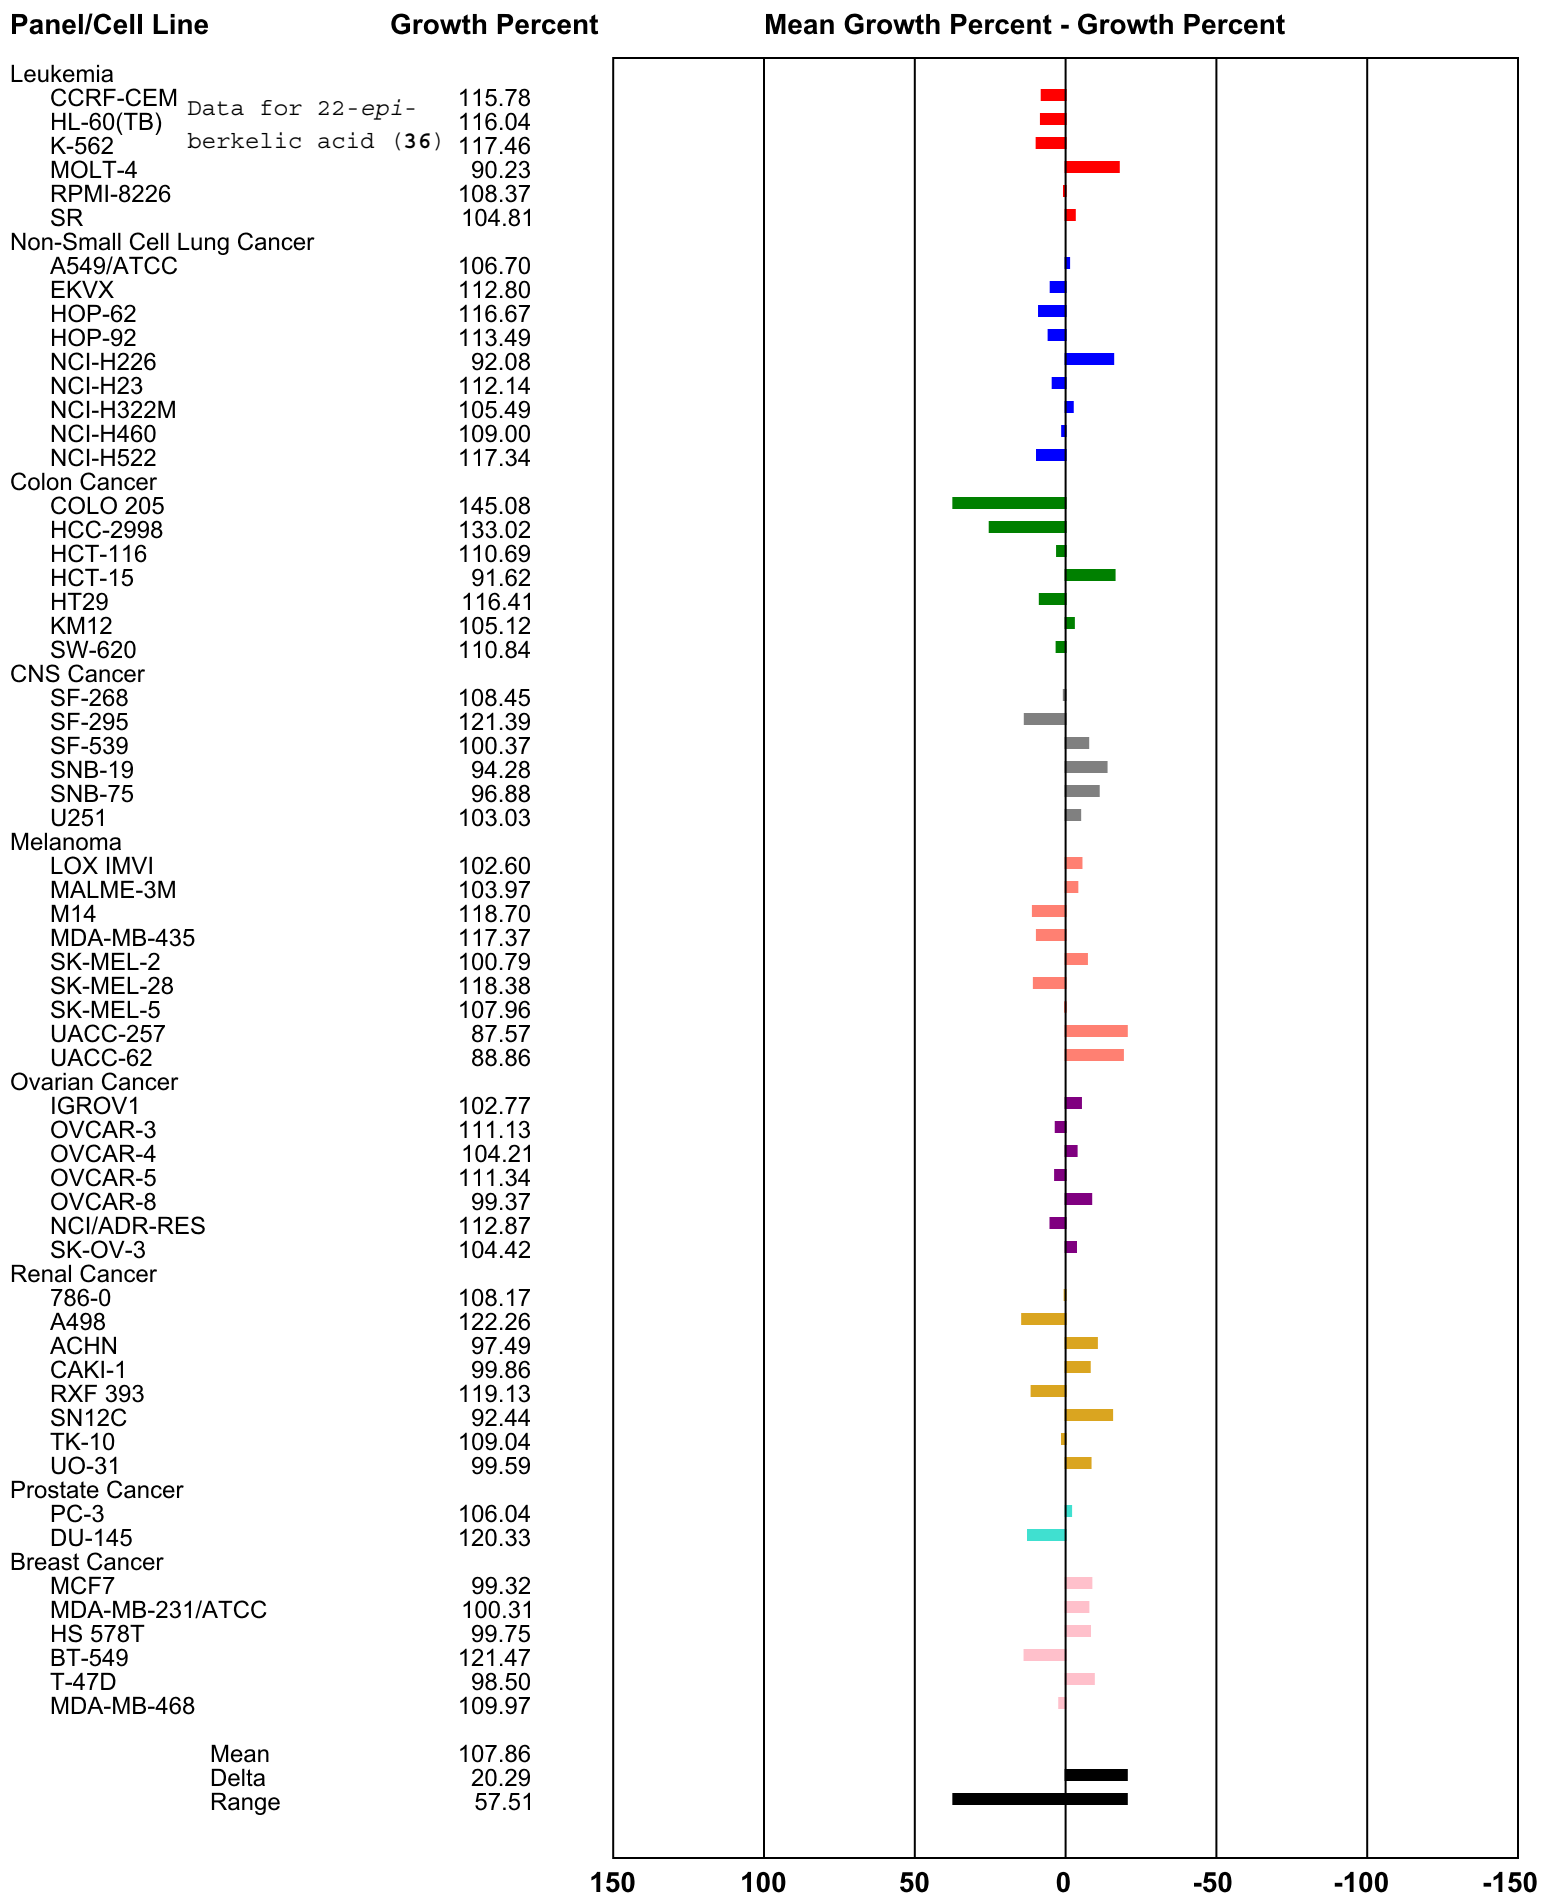

w00r-10-57-2

Pulse Sequence: s2pul

Solvent: CDCl3

Ambient temperature

File: w00r-10-57-2

INOVA-500 "gamma"

Pulse 46.1 degrees

Acq. time 1.638 sec

Width 8000.0 Hz

27 repetitions

OBSERVE H1, 399.7857971 MHz

DATA PROCESSING

FT size 32768

Total time 3 min, 31 sec

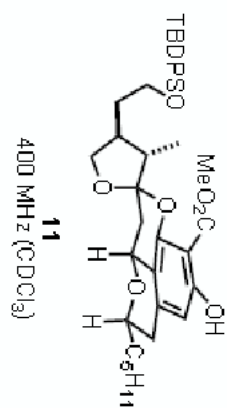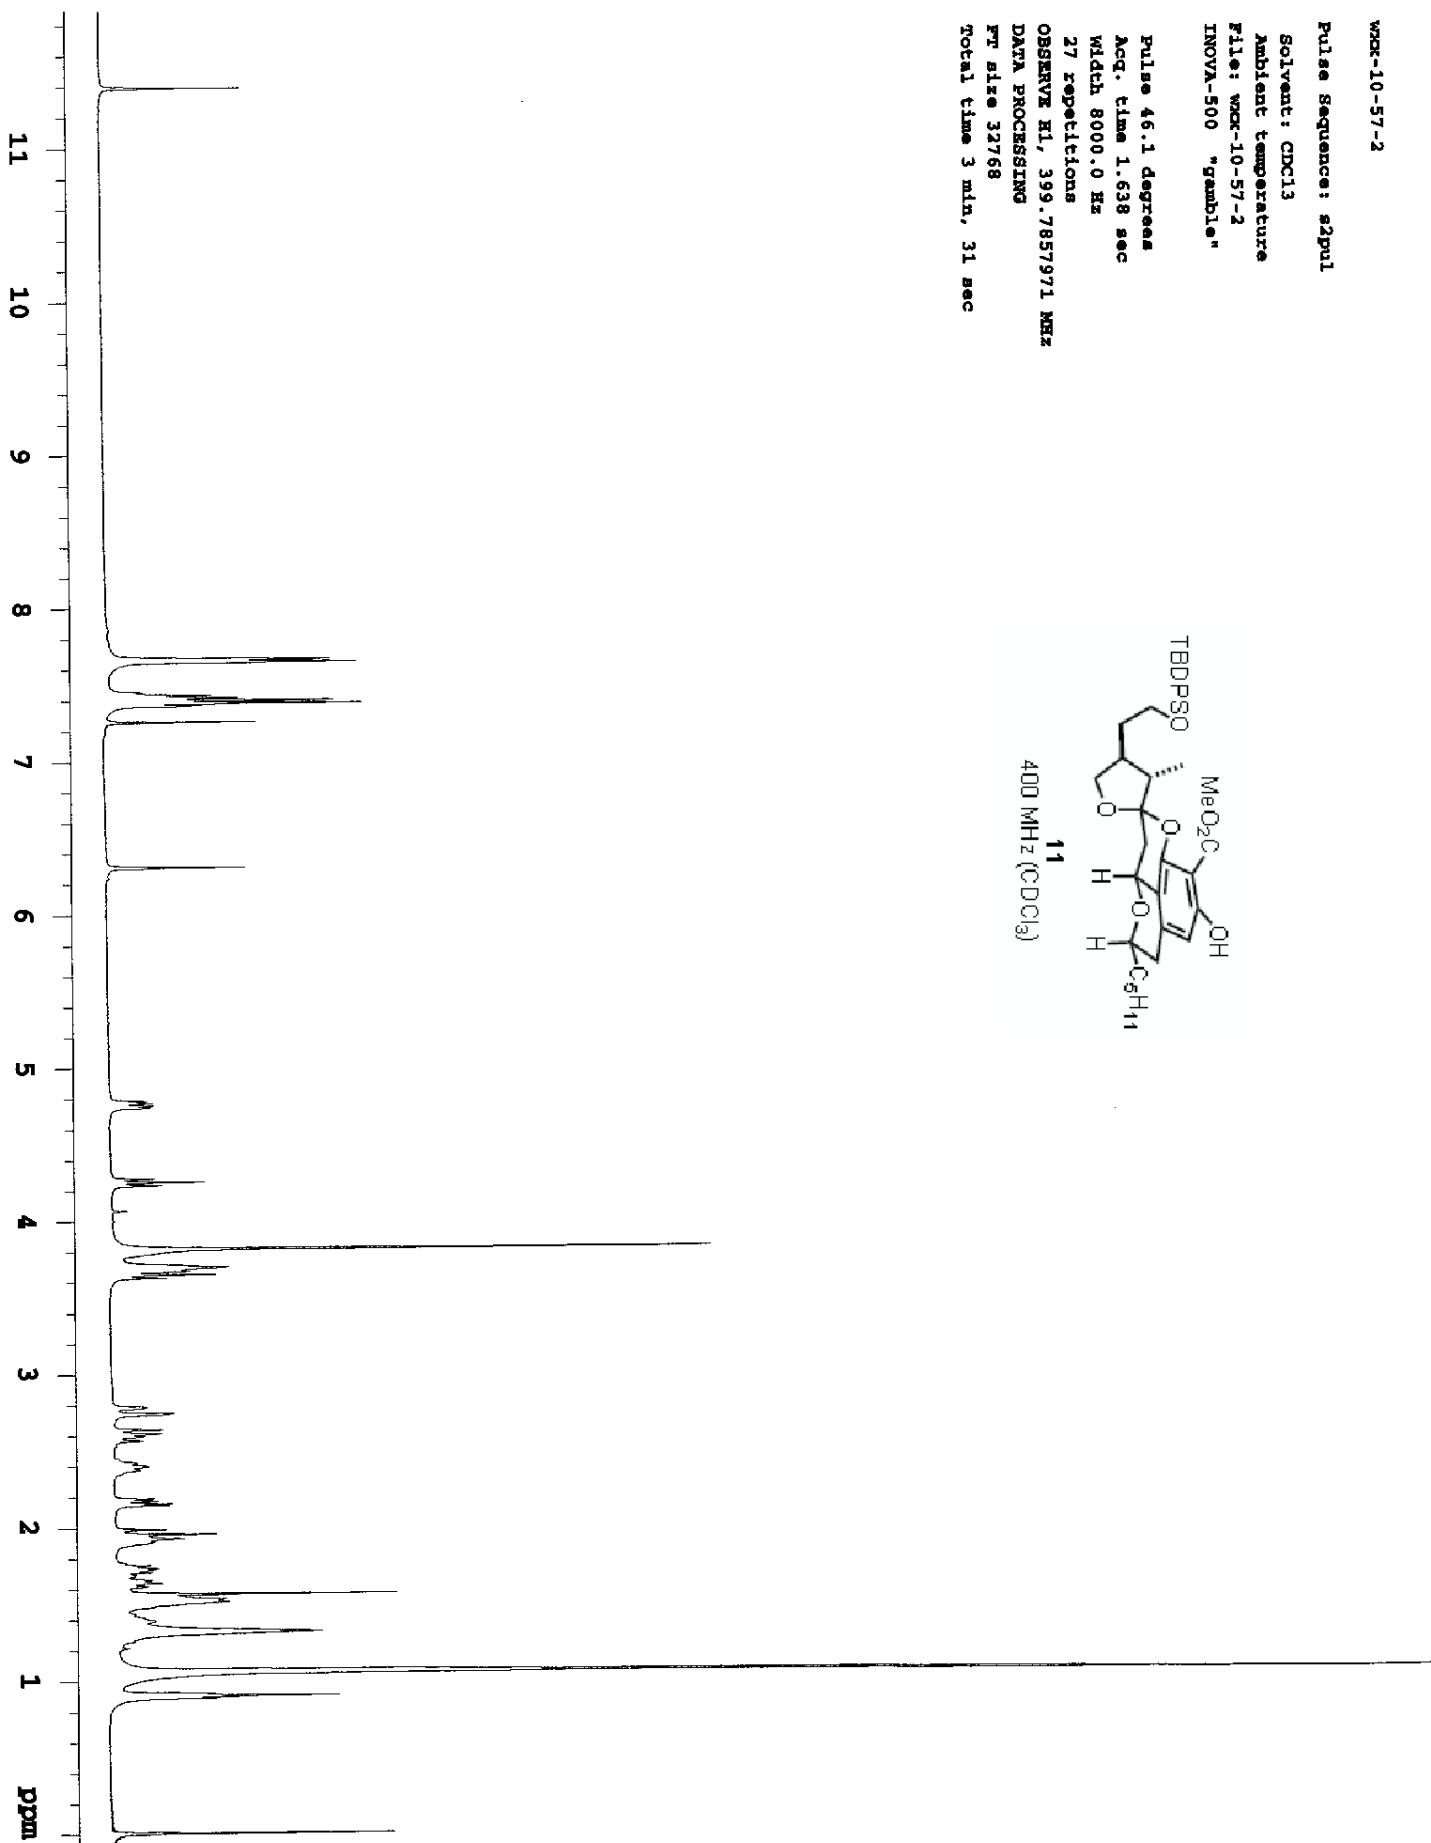

WXX-10-25-t21-30 C = 2nd

| INDEX | FREQUENCY | PPM     | HEIGHT |
|-------|-----------|---------|--------|
| 1     | 17252.086 | 171.618 | 14.7   |
| 2     | 16294.597 | 162.093 | 24.5   |
| 3     | 15386.754 | 152.067 | 21.8   |
| 4     | 14302.617 | 141.283 | 21.3   |
| 5     | 13620.494 | 135.492 | 175.3  |
| 6     | 13442.130 | 133.519 | 92.6   |
| 7     | 13037.608 | 129.694 | 57.3   |
| 8     | 13039.134 | 129.709 | 28.8   |
| 9     | 12833.903 | 127.667 | 141.1  |
| 10    | 11327.861 | 112.686 | 16.7   |
| 11    | 10950.969 | 108.936 | 29.4   |
| 12    | 10887.645 | 108.307 | 33.8   |
| 13    | 10041.545 | 99.890  | 14.2   |
| 14    | 7772.563  | 77.319  | 48.0   |
| 15    | 7740.519  | 77.000  | 44.9   |
| 16    | 7708.476  | 76.681  | 44.1   |
| 17    | 7545.207  | 75.057  | 32.8   |
| 18    | 7386.516  | 73.478  | 30.3   |
| 19    | 6854.747  | 68.189  | 31.6   |
| 20    | 6357.310  | 63.240  | 38.3   |
| 21    | 5325.108  | 51.978  | 30.6   |
| 22    | 4922.221  | 48.965  | 40.6   |
| 23    | 4179.118  | 41.572  | 40.6   |
| 24    | 3651.164  | 36.321  | 40.4   |
| 25    | 3567.241  | 35.486  | 32.9   |
| 26    | 3469.584  | 34.514  | 32.5   |
| 27    | 3416.942  | 33.991  | 31.4   |
| 28    | 3193.400  | 31.767  | 46.3   |
| 29    | 2695.964  | 26.819  | 137.6  |
| 30    | 2522.014  | 25.088  | 43.0   |
| 31    | 2271.006  | 22.591  | 41.0   |
| 32    | 1921.580  | 19.115  | 27.7   |
| 33    | 1411.174  | 14.038  | 35.7   |
| 34    | 1173.137  | 11.670  | 34.0   |

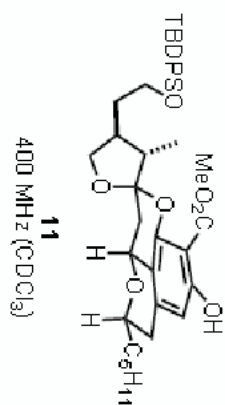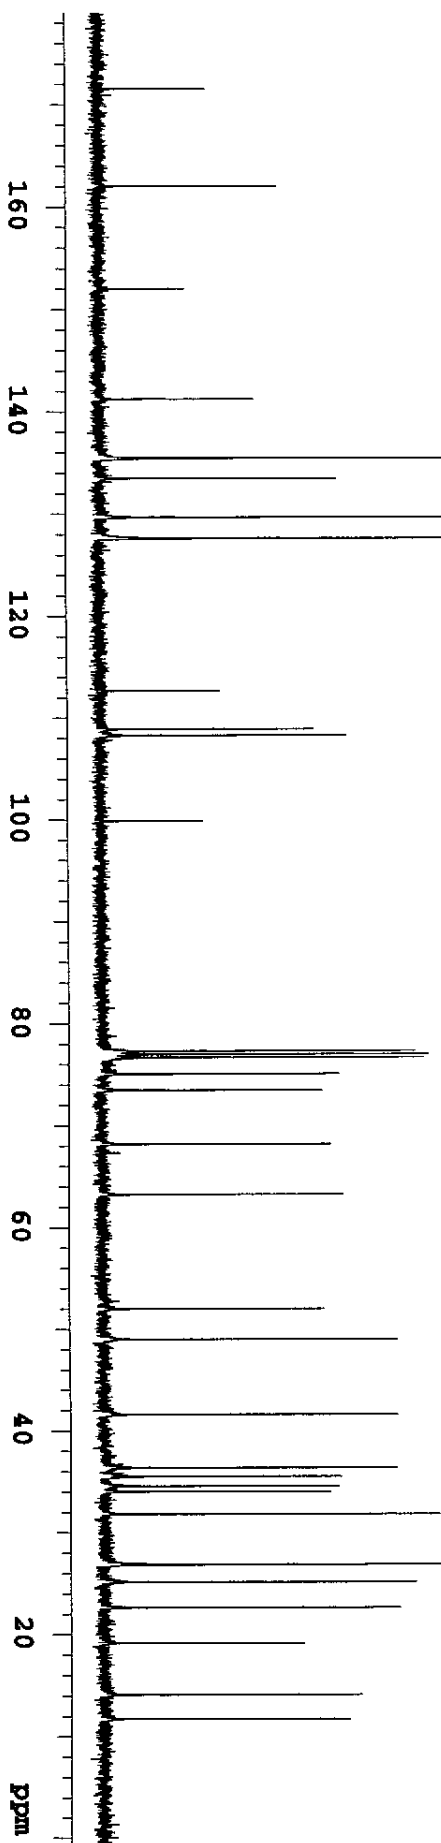

WJCK-10-57-2

Pulse Sequence: gCOSY

Solvent: CDCl<sub>3</sub>

Ambient temperature

INNOVA-400 "F1d"

Relax. delay 1.000 sec

Acq. time 0.128 sec

Width 8000.0 Hz

2D Width 8000.0 Hz

Single scan

128 increments

OBSERVE H1, 399.7858103 MHz

DATA PROCESSING

Sq. sine bell 0.064 sec

F1 DATA PROCESSING

Sq. sine bell 0.016 sec

FR size 2048 x 2048

Total time 2 min, 45 sec

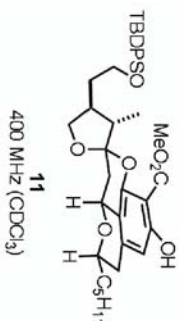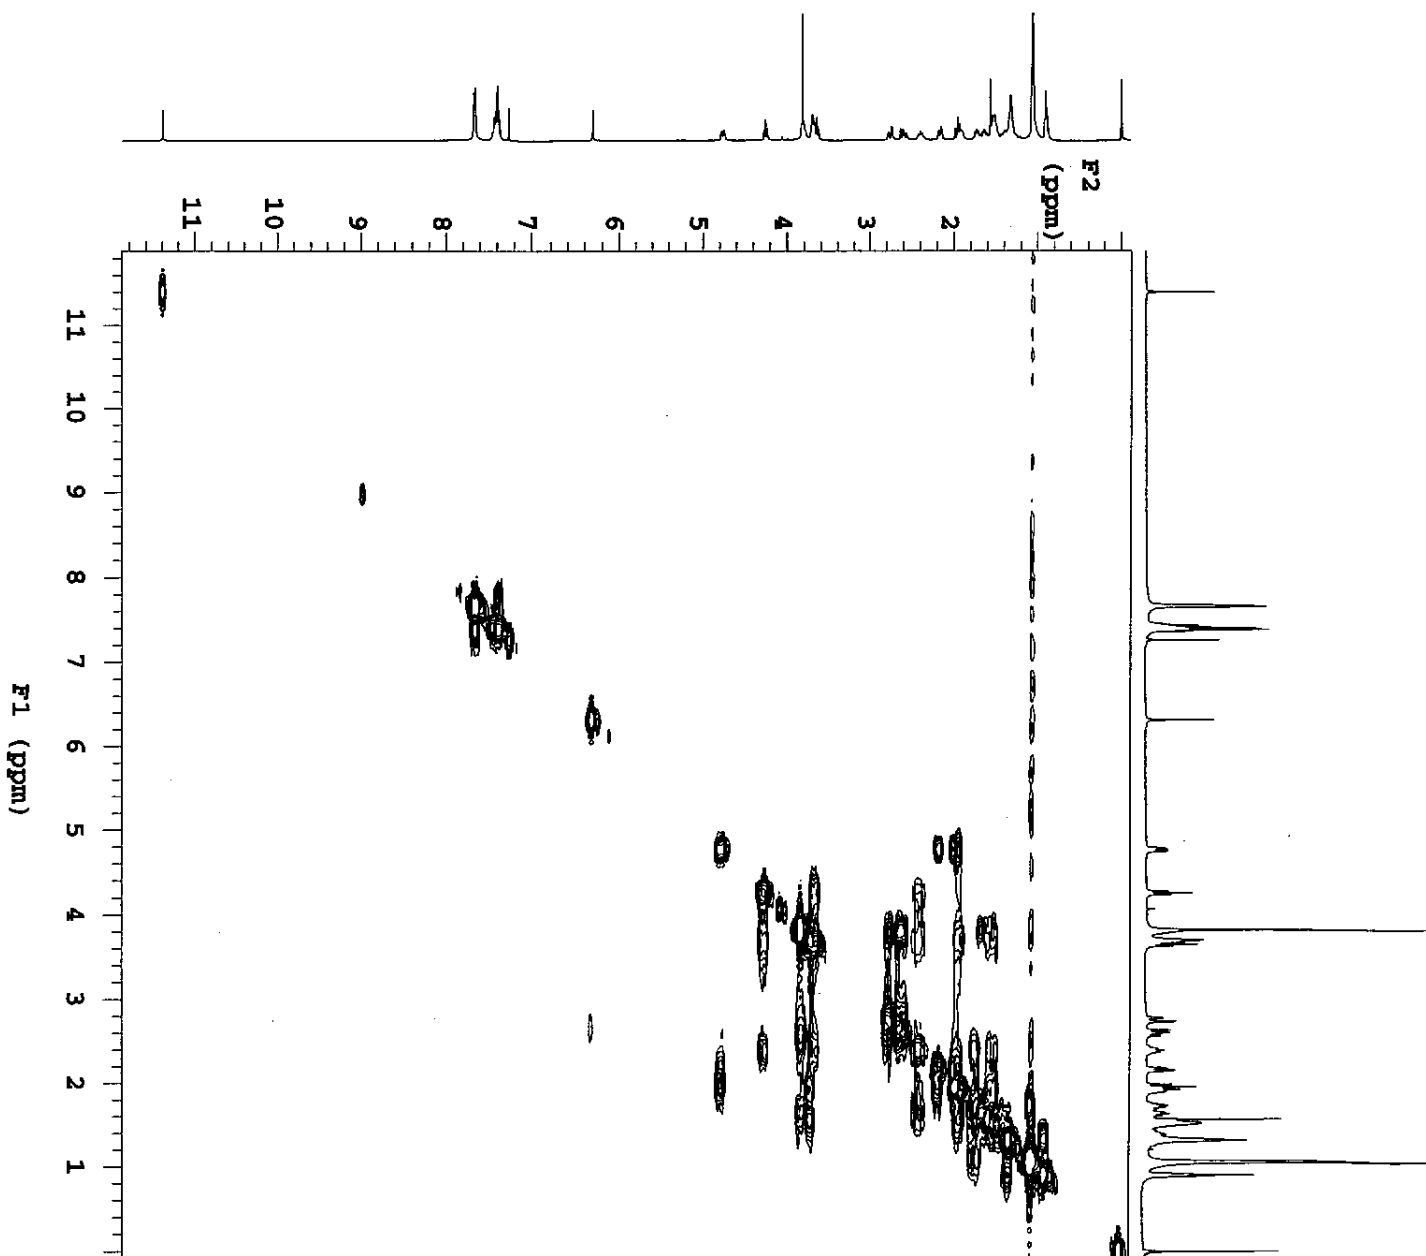

WZK-10-51-4

Pulse Sequence: s2pul  
Solvent: CDCl3  
Ambient temperature  
INOVA-400 "f1d"

Pulse 46.1 degrees  
Acq. time 1.638 sec  
Width 8000.0 Hz  
17 repetitions  
OBSERVE H1, 399.7858088 MHz  
DATA PROCESSING  
F1 size 32768  
Total time 3 min, 30 sec

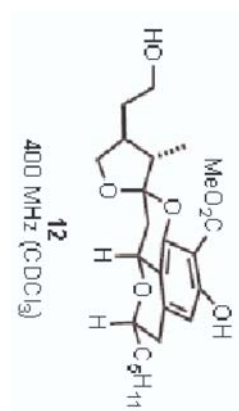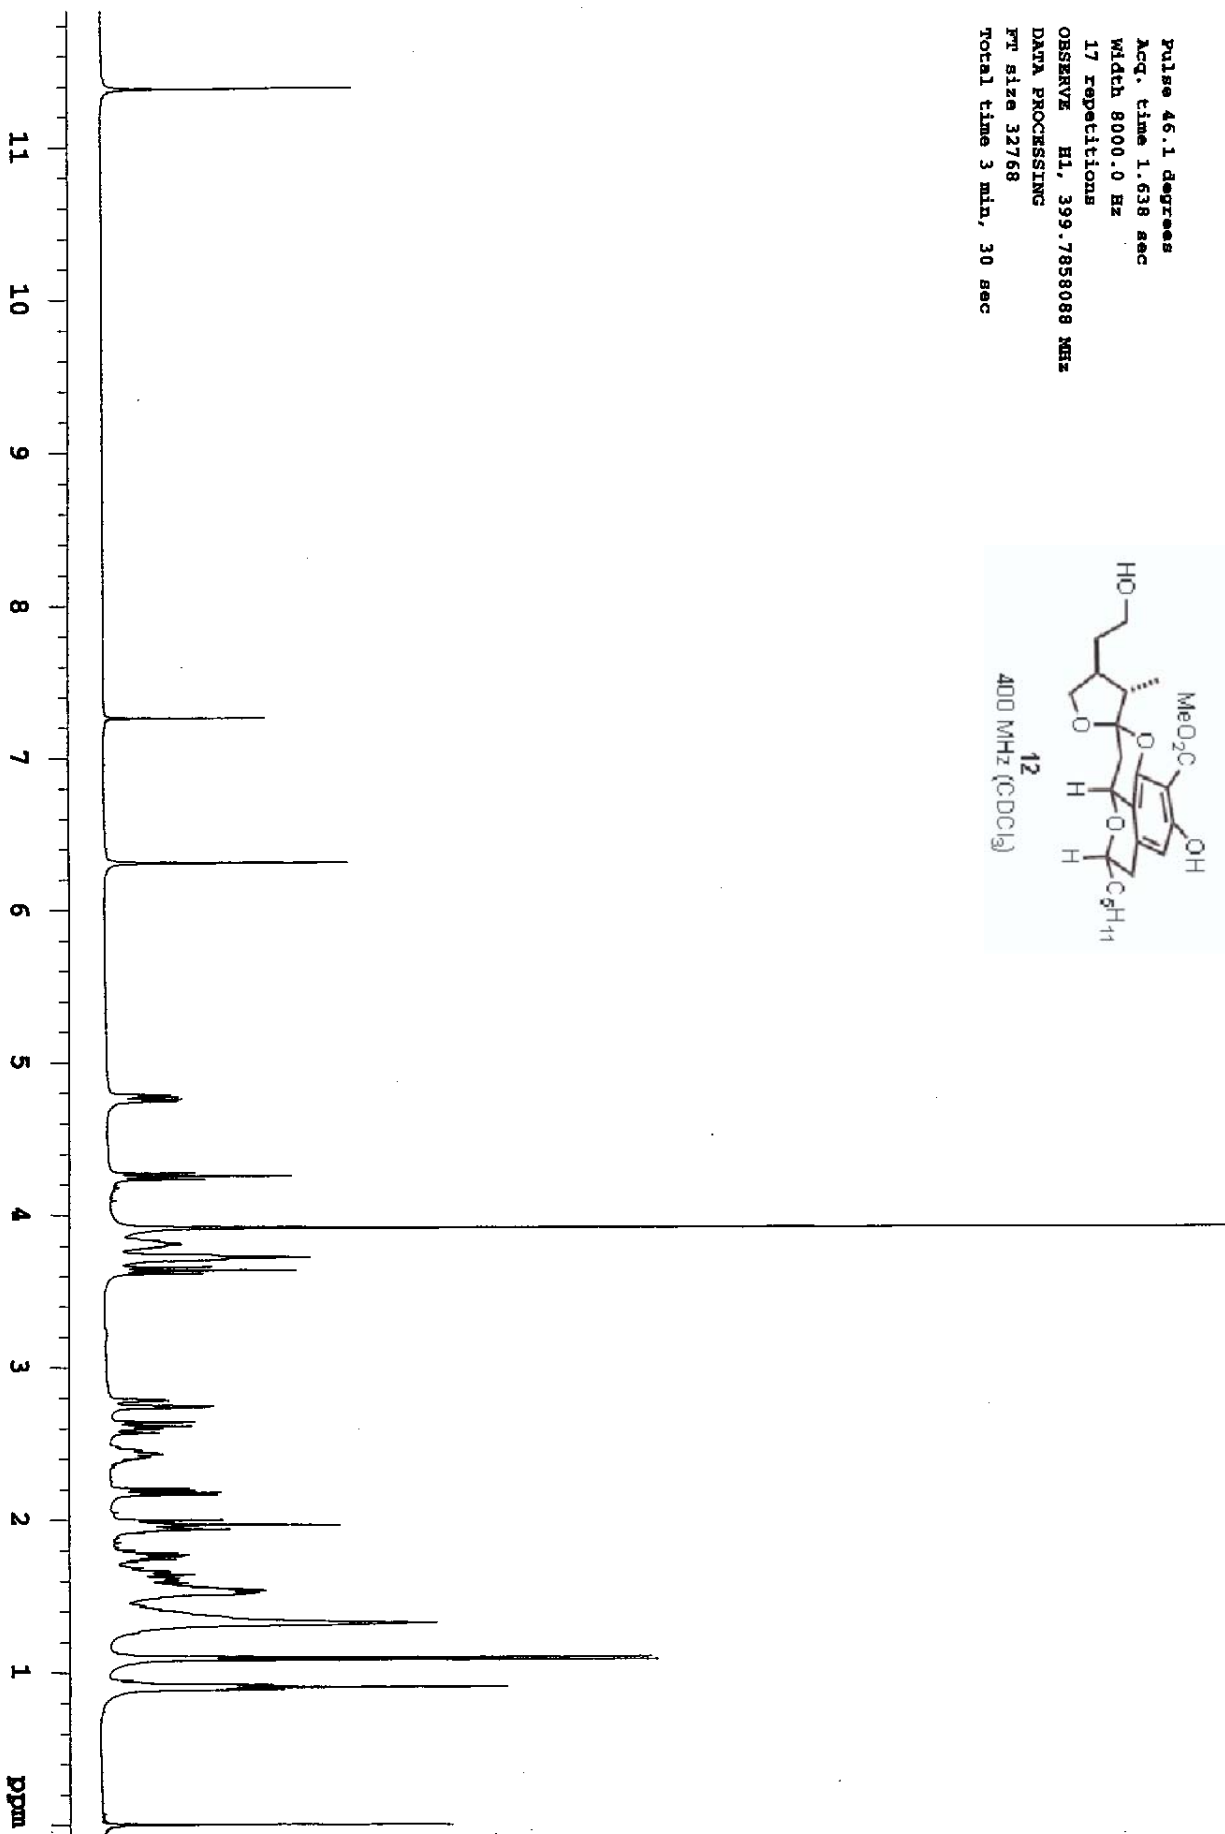

WXX-10-51-t19-20c

| INDEX | FREQUENCY | PPM     | BRIGHT |
|-------|-----------|---------|--------|
| 1     | 17249.034 | 171.587 | 20.1   |
| 2     | 16292.308 | 162.070 | 32.0   |
| 3     | 15284.465 | 152.045 | 16.8   |
| 4     | 14204.142 | 141.298 | 28.6   |
| 5     | 11327.861 | 112.686 | 23.1   |
| 6     | 10963.938 | 109.065 | 54.9   |
| 7     | 10889.170 | 108.322 | 55.9   |
| 8     | 10040.782 | 99.882  | 21.6   |
| 9     | 7772.563  | 77.319  | 139.1  |
| 10    | 7740.519  | 77.000  | 132.9  |
| 11    | 7708.476  | 76.681  | 128.7  |
| 12    | 7546.733  | 75.072  | 50.8   |
| 13    | 7349.131  | 73.107  | 51.8   |
| 14    | 6850.169  | 68.143  | 52.1   |
| 15    | 6217.692  | 61.851  | 62.9   |
| 16    | 5231.974  | 52.046  | 50.4   |
| 17    | 4911.540  | 48.858  | 62.9   |
| 18    | 4103.587  | 40.821  | 69.7   |
| 19    | 3651.164  | 36.321  | 62.1   |
| 20    | 3551.982  | 35.334  | 56.2   |
| 21    | 3468.821  | 34.507  | 56.4   |
| 22    | 3407.023  | 33.892  | 52.9   |
| 23    | 3194.163  | 31.774  | 64.3   |
| 24    | 2522.013  | 25.088  | 66.3   |
| 25    | 2271.006  | 22.591  | 55.7   |
| 26    | 1411.174  | 14.038  | 54.0   |
| 27    | 1176.188  | 11.700  | 51.5   |

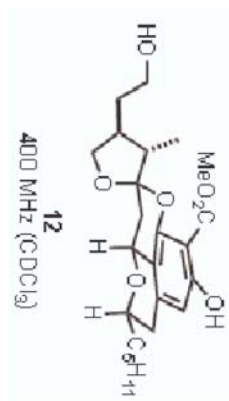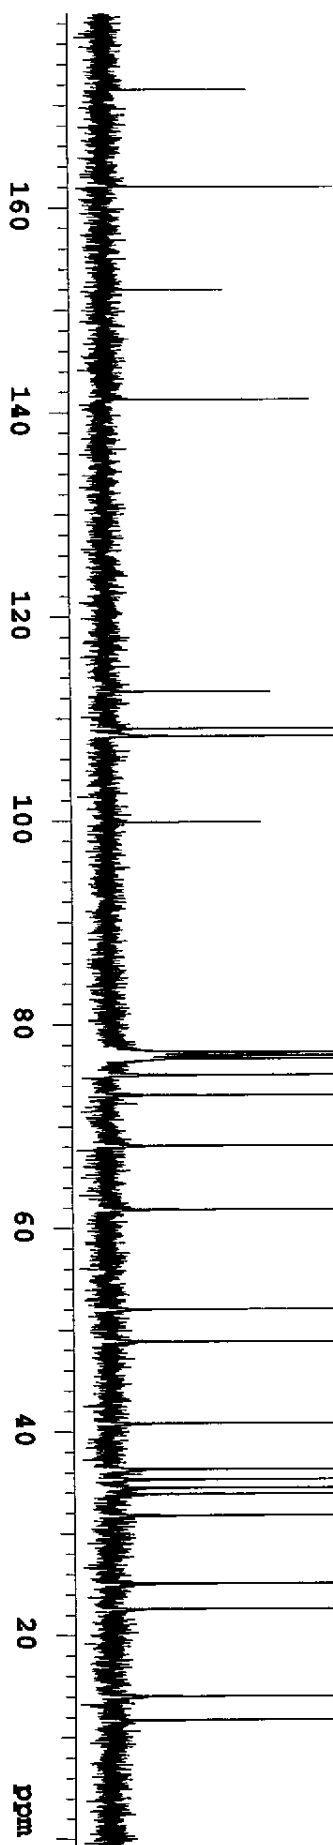

WJCC-10-51-4

Pulse Sequence: gcosy

Solvent: CDCl3

Ambient temperature

INOVA-400 "F1d"

Relax. delay 1.000 sec

Acq. time 0.128 sec

Width 8000.0 Hz

2D Width 8000.0 Hz

Single scan

128 increments

OBSERVE H1, 399.7858088 MHz

DATA PROCESSING

Sq. sine bell 0.064 sec

F1 DATA PROCESSING

Sq. sine bell 0.016 sec

FR size 2048 x 2048

Total time 2 min, 45 sec

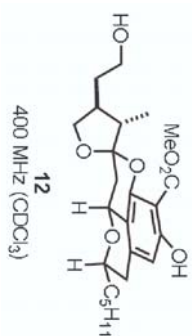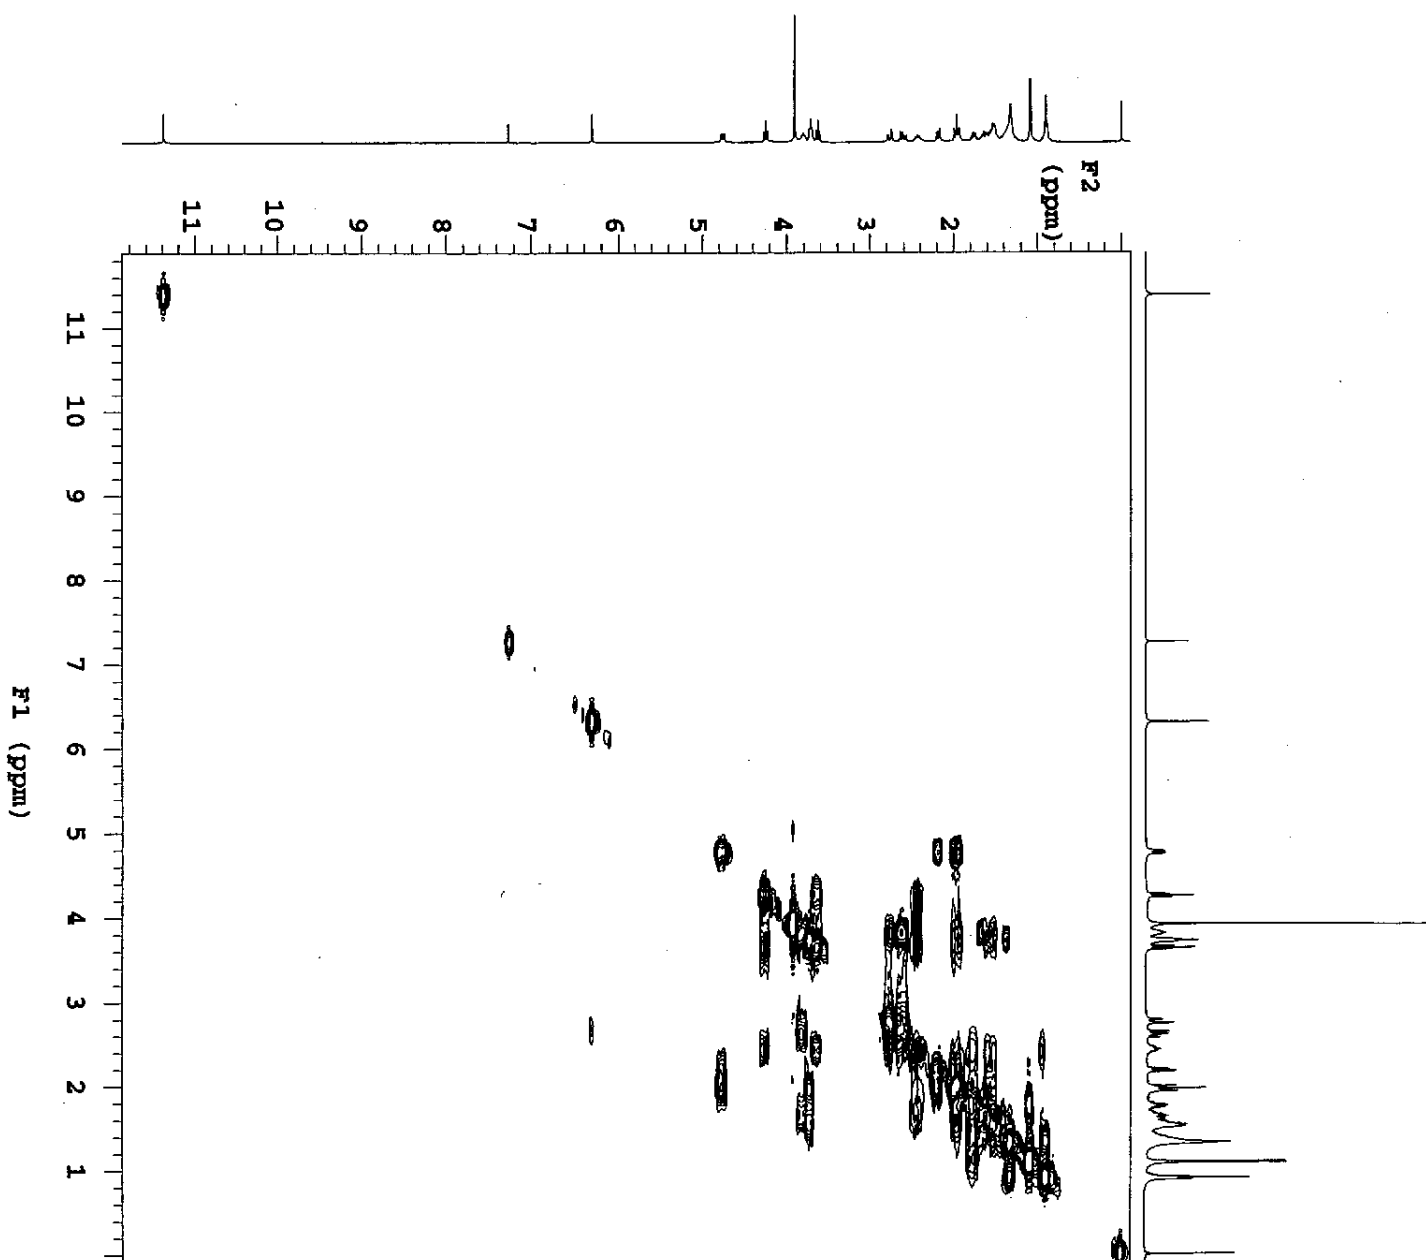

wxc-9-49-1

Pulse Sequence: s2pul

Solvent: CDCl3

Ambient temperature

File: wxc-9-49-1

INOVA-500 "gambie"

Pulse 46.1 degrees

Acq. time 1.638 sec

Width 5000.0 Hz

42 repetitions

OBSERVE H1, 399.7532349 MHz

DATA PROCESSING

FT size 16384

Total time 3 min, 31 sec

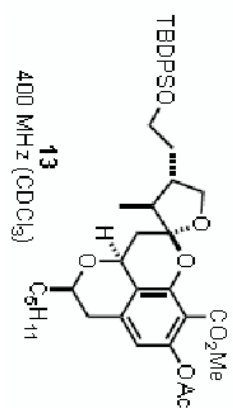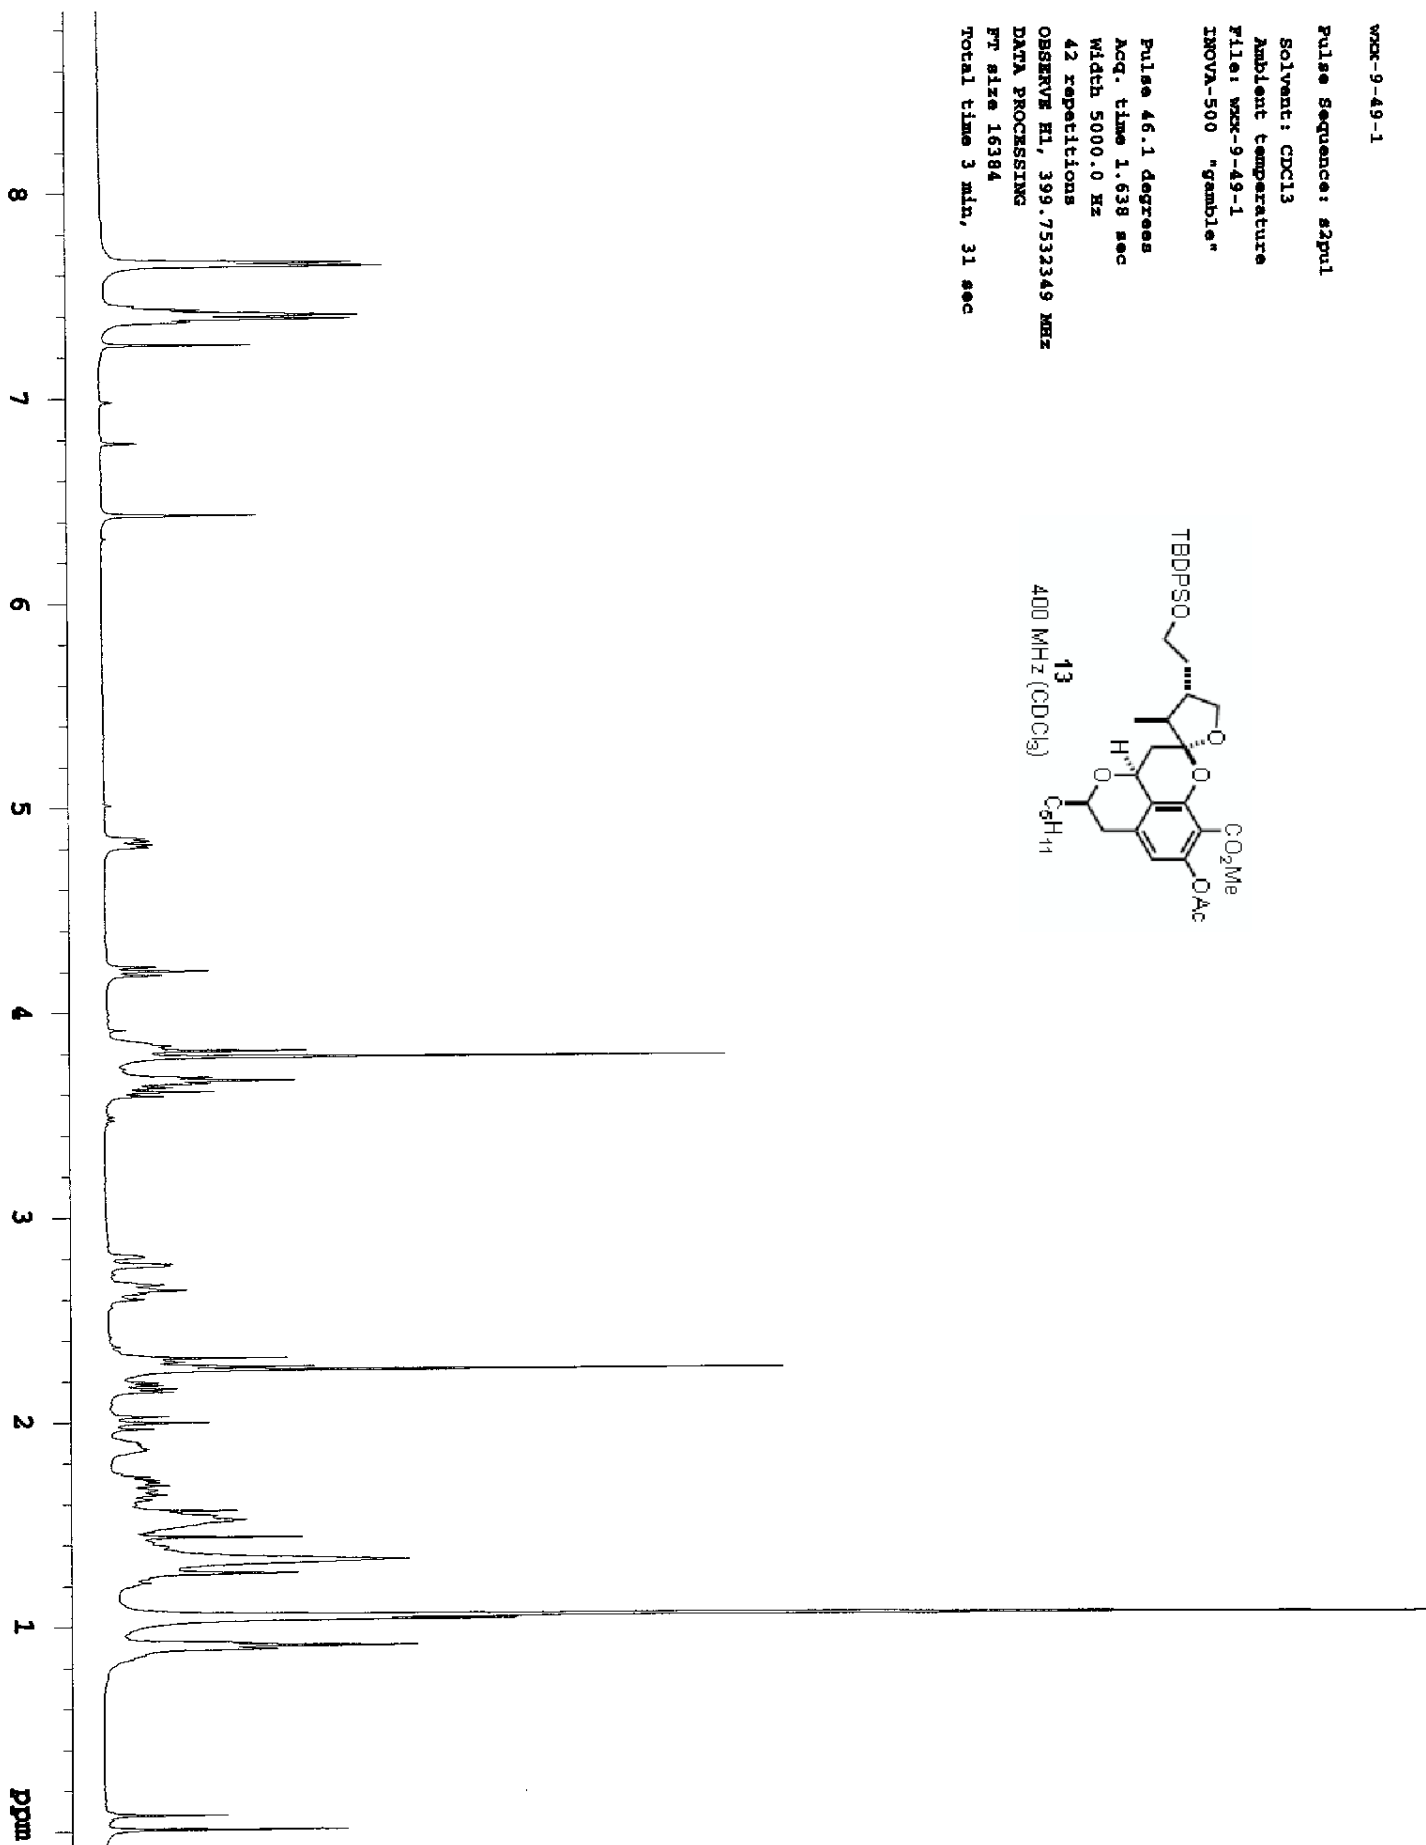



WXX-9-49-1

Pulse Sequence: gcosy

Solvent: CDCl3

Ambient temperature

INOVA-400 "fid"

Relax. delay 1.000 sec

Acq. time 0.205 sec

Width 5000.0 Hz

2D Width 5000.0 Hz

Single scan

128 increments

OBSERVE H1, 399.7532391 MHz

DATA PROCESSING

Sq. sine bell 0.102 sec

F1 DATA PROCESSING

Sq. sine bell 0.026 sec

FT size 2048 x 2048

Total time 2 min, 56 sec

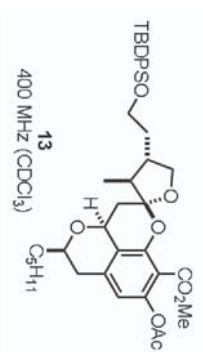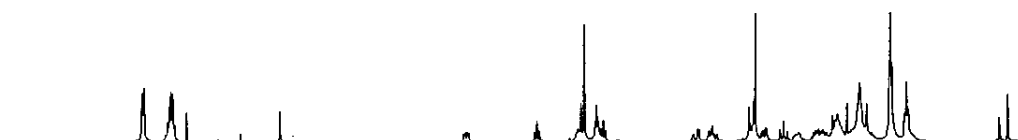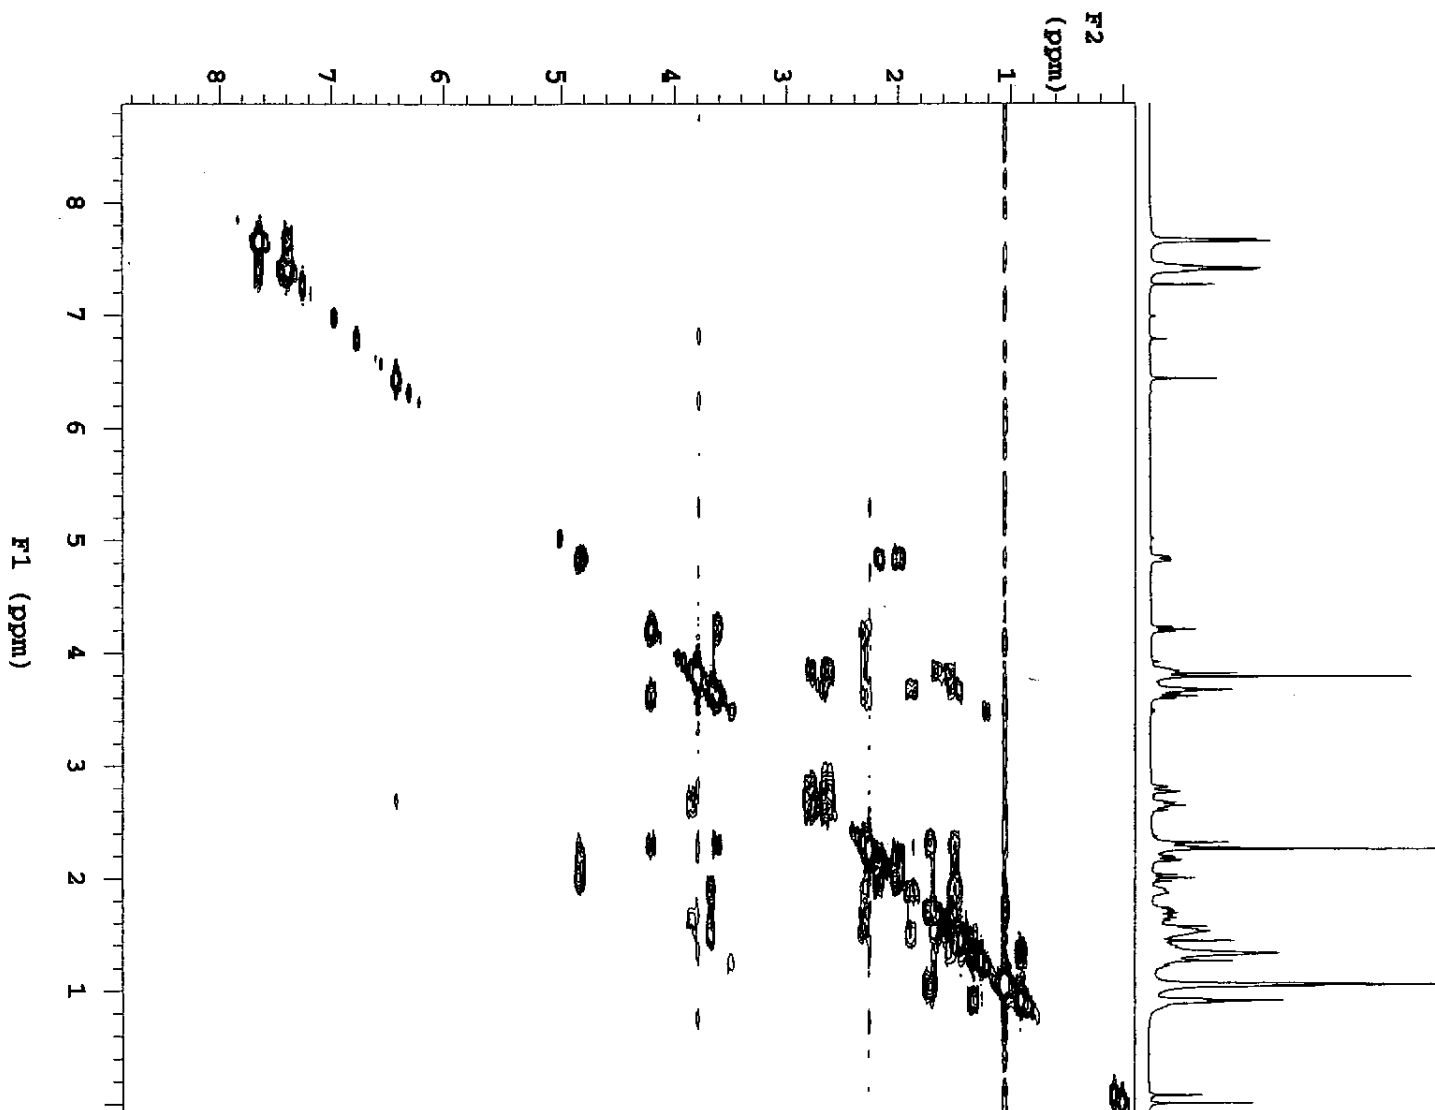

wzck-9-89-3

Pulse Sequence: s2pul

Solvent: CDCl3

Ambient temperature

File: wzck-9-89-3

INOVA-500 "gambler"

Pulse 46.1 degrees

Acq. time 1.638 sec

Width 5000.0 Hz

55 repetitions

OBSERVE H1, 399.7532349 MHz

DATA PROCESSING

FF size 16384

Total time 3 min, 31 sec

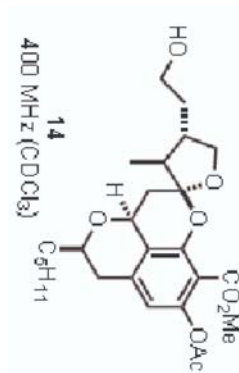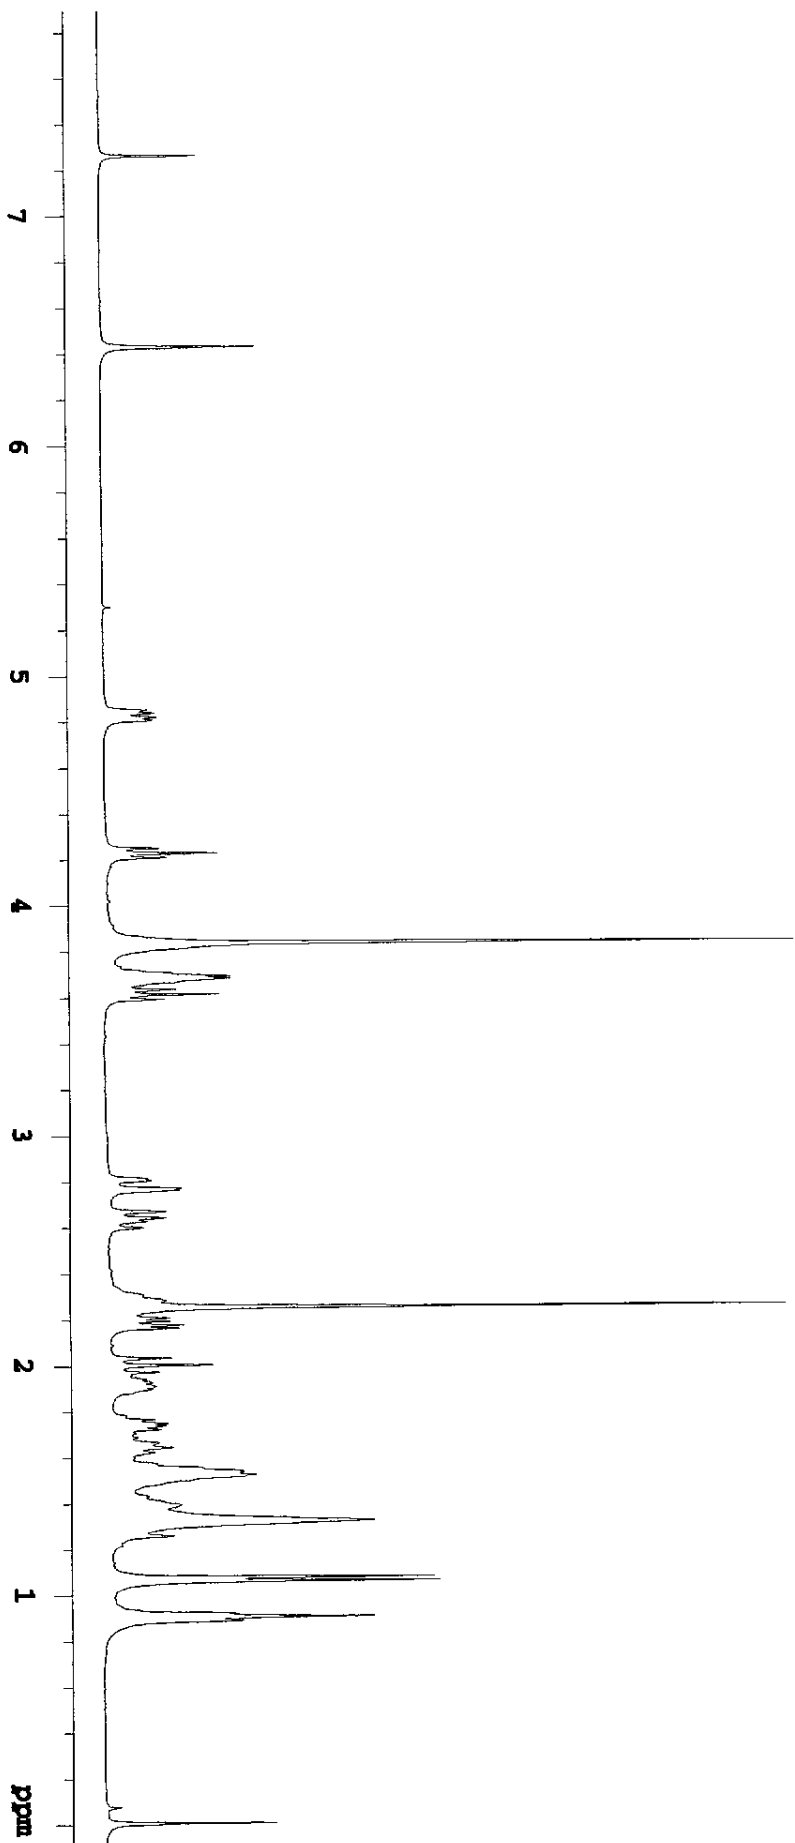

WXX-9-89-3C

| INDEX | FREQUENCY | PPM     | HEIGHT |
|-------|-----------|---------|--------|
| 1     | 17024.862 | 169.371 | 27.3   |
| 2     | 16573.202 | 164.878 | 17.1   |
| 3     | 15090.047 | 150.123 | 22.1   |
| 4     | 14908.468 | 148.316 | 28.2   |
| 5     | 13786.947 | 137.159 | 43.1   |
| 6     | 12030.660 | 119.687 | 34.5   |
| 7     | 11465.322 | 114.062 | 60.0   |
| 8     | 11244.832 | 111.869 | 17.8   |
| 9     | 10962.545 | 109.060 | 54.0   |
| 10    | 7771.932  | 77.319  | 375.4  |
| 11    | 7739.889  | 77.000  | 385.7  |
| 12    | 7707.845  | 76.681  | 374.5  |
| 13    | 7557.546  | 75.186  | 56.2   |
| 14    | 7340.108  | 73.023  | 51.5   |
| 15    | 6855.642  | 68.203  | 56.2   |
| 16    | 6217.061  | 61.850  | 59.8   |
| 17    | 5220.663  | 51.938  | 56.2   |
| 18    | 4913.198  | 48.879  | 60.4   |
| 19    | 4099.142  | 40.780  | 70.0   |
| 20    | 3643.667  | 36.249  | 67.7   |
| 21    | 3575.002  | 35.566  | 61.6   |
| 22    | 3424.703  | 34.071  | 57.1   |
| 23    | 3410.970  | 33.934  | 53.8   |
| 24    | 3193.532  | 31.771  | 70.2   |
| 25    | 2522.909  | 25.099  | 69.6   |
| 26    | 2271.902  | 22.602  | 77.9   |
| 27    | 2094.900  | 20.841  | 56.7   |
| 28    | 1411.306  | 14.040  | 64.2   |
| 29    | 1172.506  | 11.665  | 55.1   |

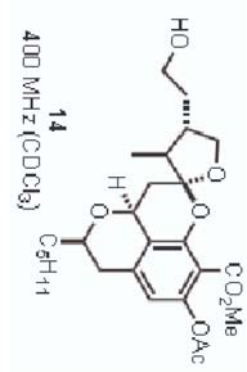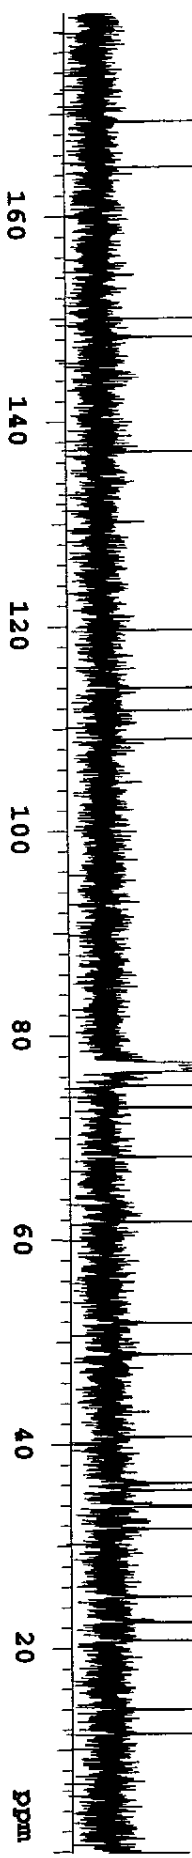

wkck-9-49-3

Pulse Sequence: gCOSY

Solvent: CDCl3

Ambient temperature

INOVA-400 "fid"

Relax. delay 1.000 sec

Acq. time 0.205 sec

Width 5000.0 Hz

2D Width 5000.0 Hz

Single scan

128 increments

OBSERVE H1, 399.7532379 MHz

DATA PROCESSING

Sq. sine bell 0.102 sec

F1 DATA PROCESSING

Sq. sine bell 0.026 sec

PI size 2048 x 2048

Total time 2 min, 56 sec

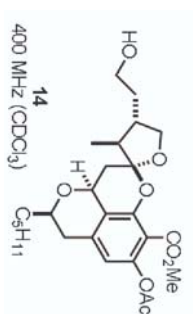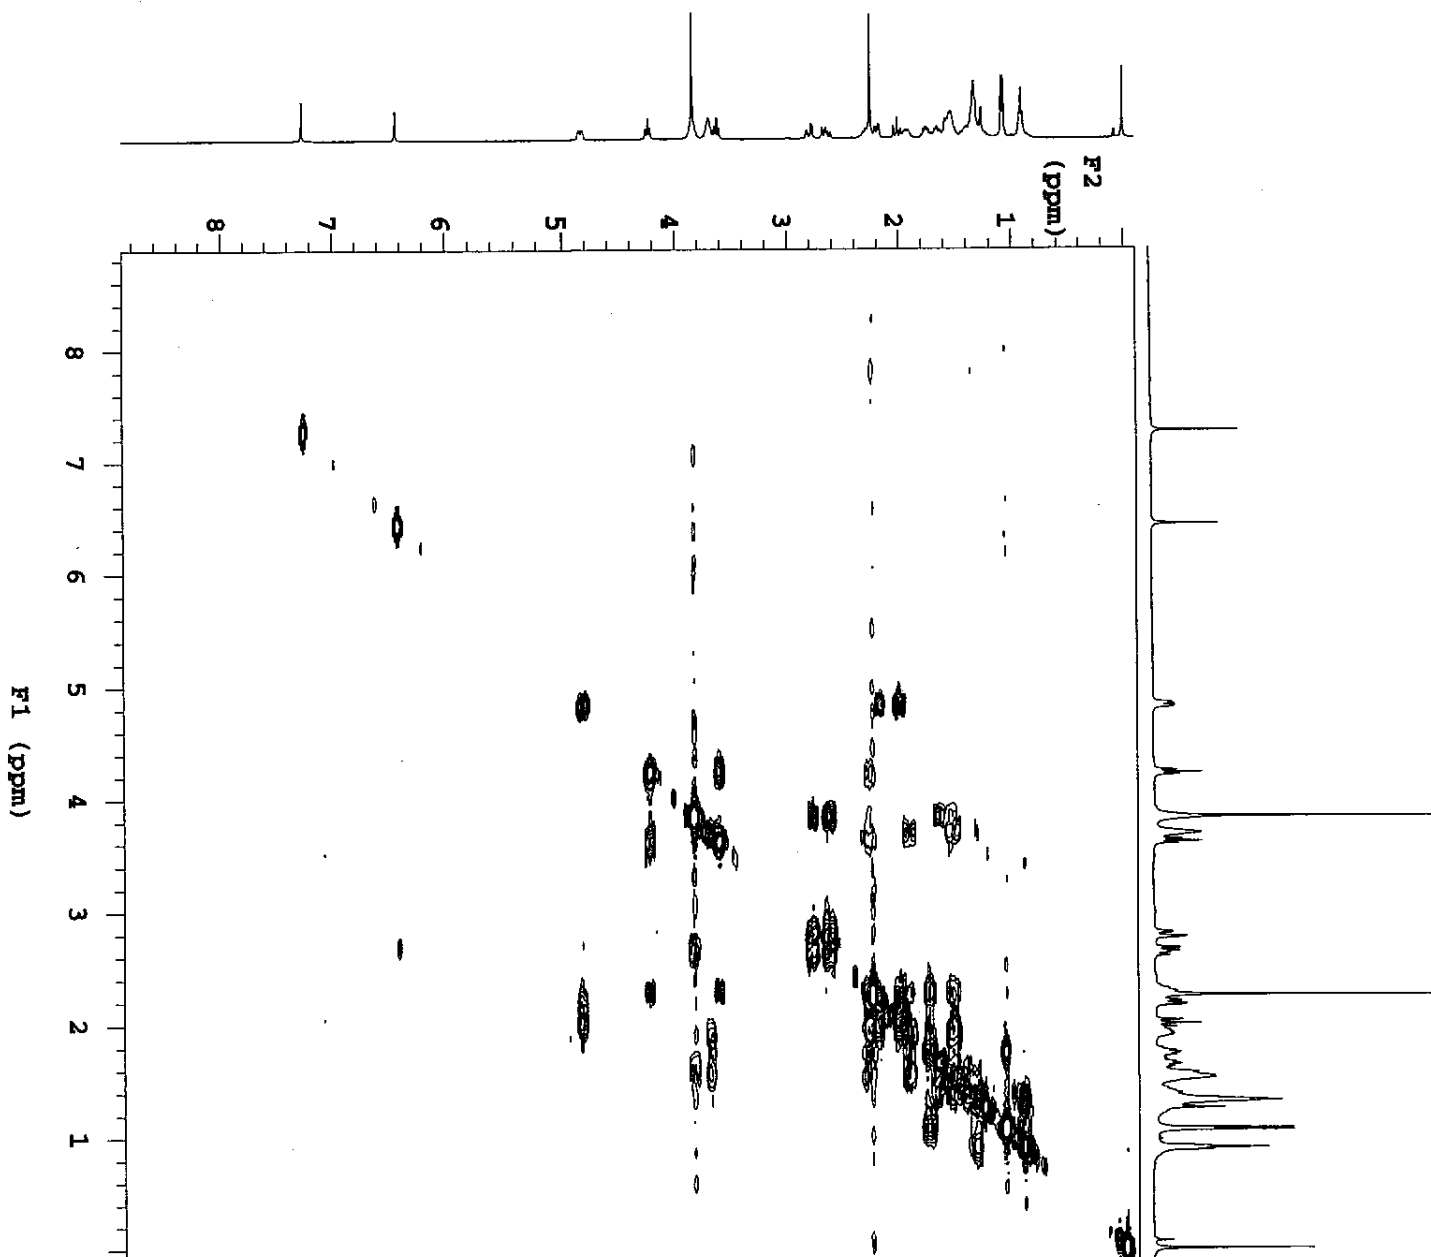

wmr-9-55-1

Pulse Sequence: s2pul

Solvent: CDCl3

Ambient temperature

File: wmr-9-55-1

INOVA-500 "gambler"

Pulse 46.1 degrees

Acq. time 1.638 sec

Width 5000.0 Hz

37 repetitions

OBSERVE H1, 399.7532349 MHz

DATA PROCESSING

FF size 16384

Total time 3 min, 31 sec

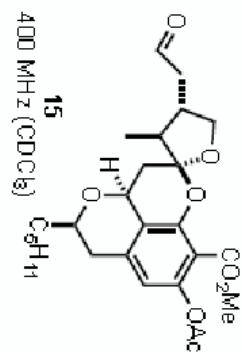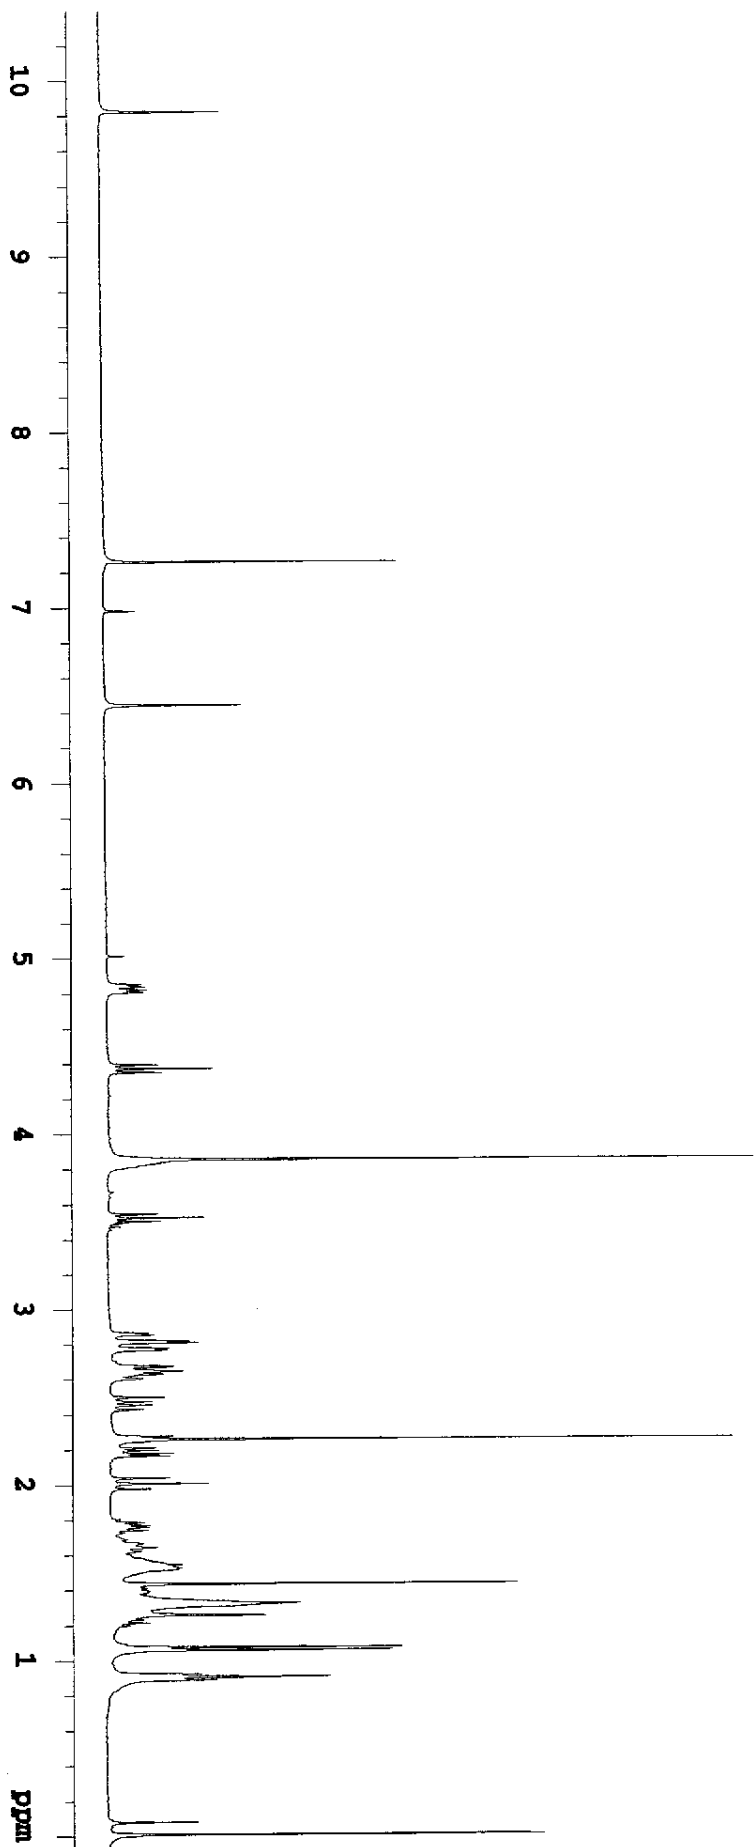

WKK-9-93-1

Pulse Sequence: gpcosy

Solvent: CDCl3  
Ambient temperature  
INOVA-400 "F1A"

Relax. delay 1.000 sec  
Acq. time 0.205 sec  
Width 5000.0 Hz  
2D Width 5000.0 Hz  
Single scan  
128 increments  
OBSERVE F1, 399.7532379 MHz  
DATA PROCESSING  
Sq. sine bell 0.102 sec  
F1 DATA PROCESSING  
Sq. sine bell 0.026 sec  
F1 size 2048 x 2048  
Total time 2 min, 56 sec

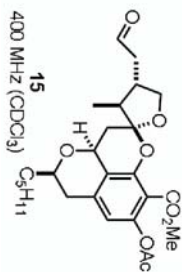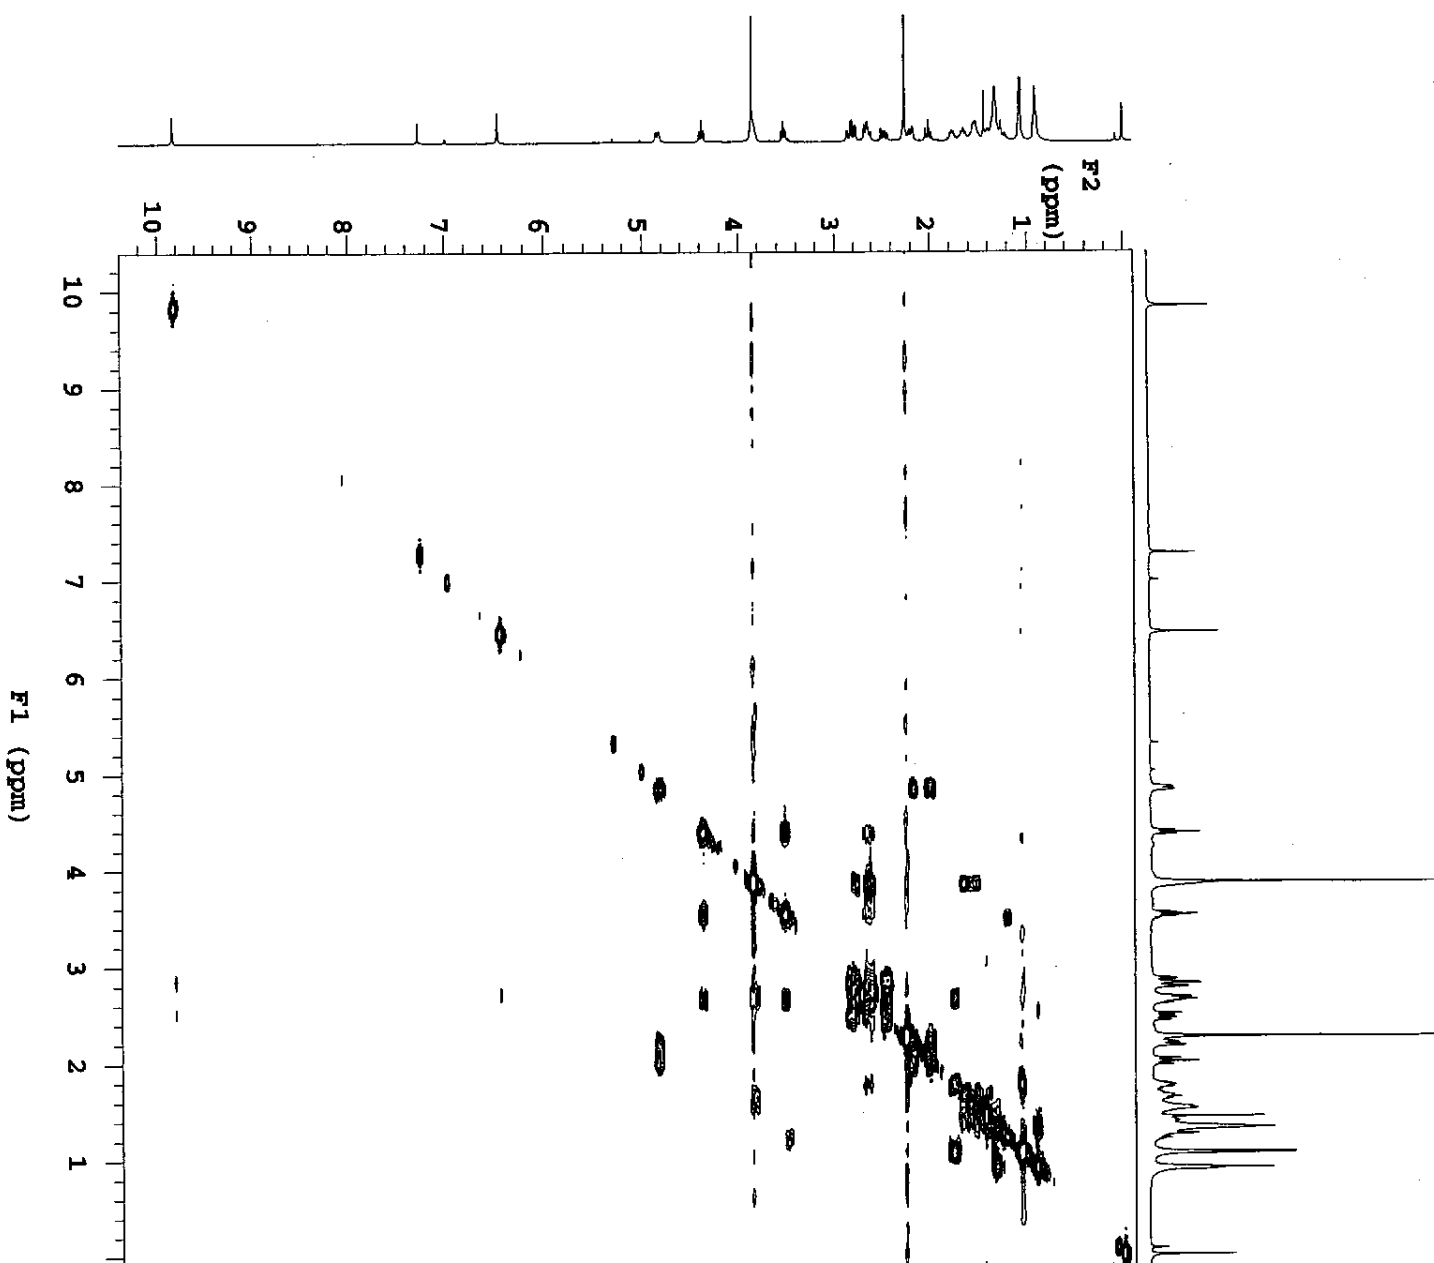

wak-10-53-2\_2nd

Pulse Sequence: zgpg30

Solvent: CDCl3

Ambient temperature

File: wak-10-53-2\_2nd

INOVA-400 \*F1d\*

Pulse 46.1 degrees

Acq. time 1.638 sec

Width 5000.0 Hz

32 repetitions

OBSERVE H1, 399.7858074 MHz

DATA PROCESSING

FT size 16384

Total time 3 min, 30 sec

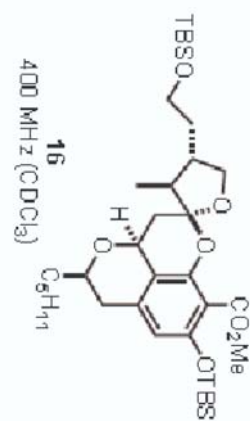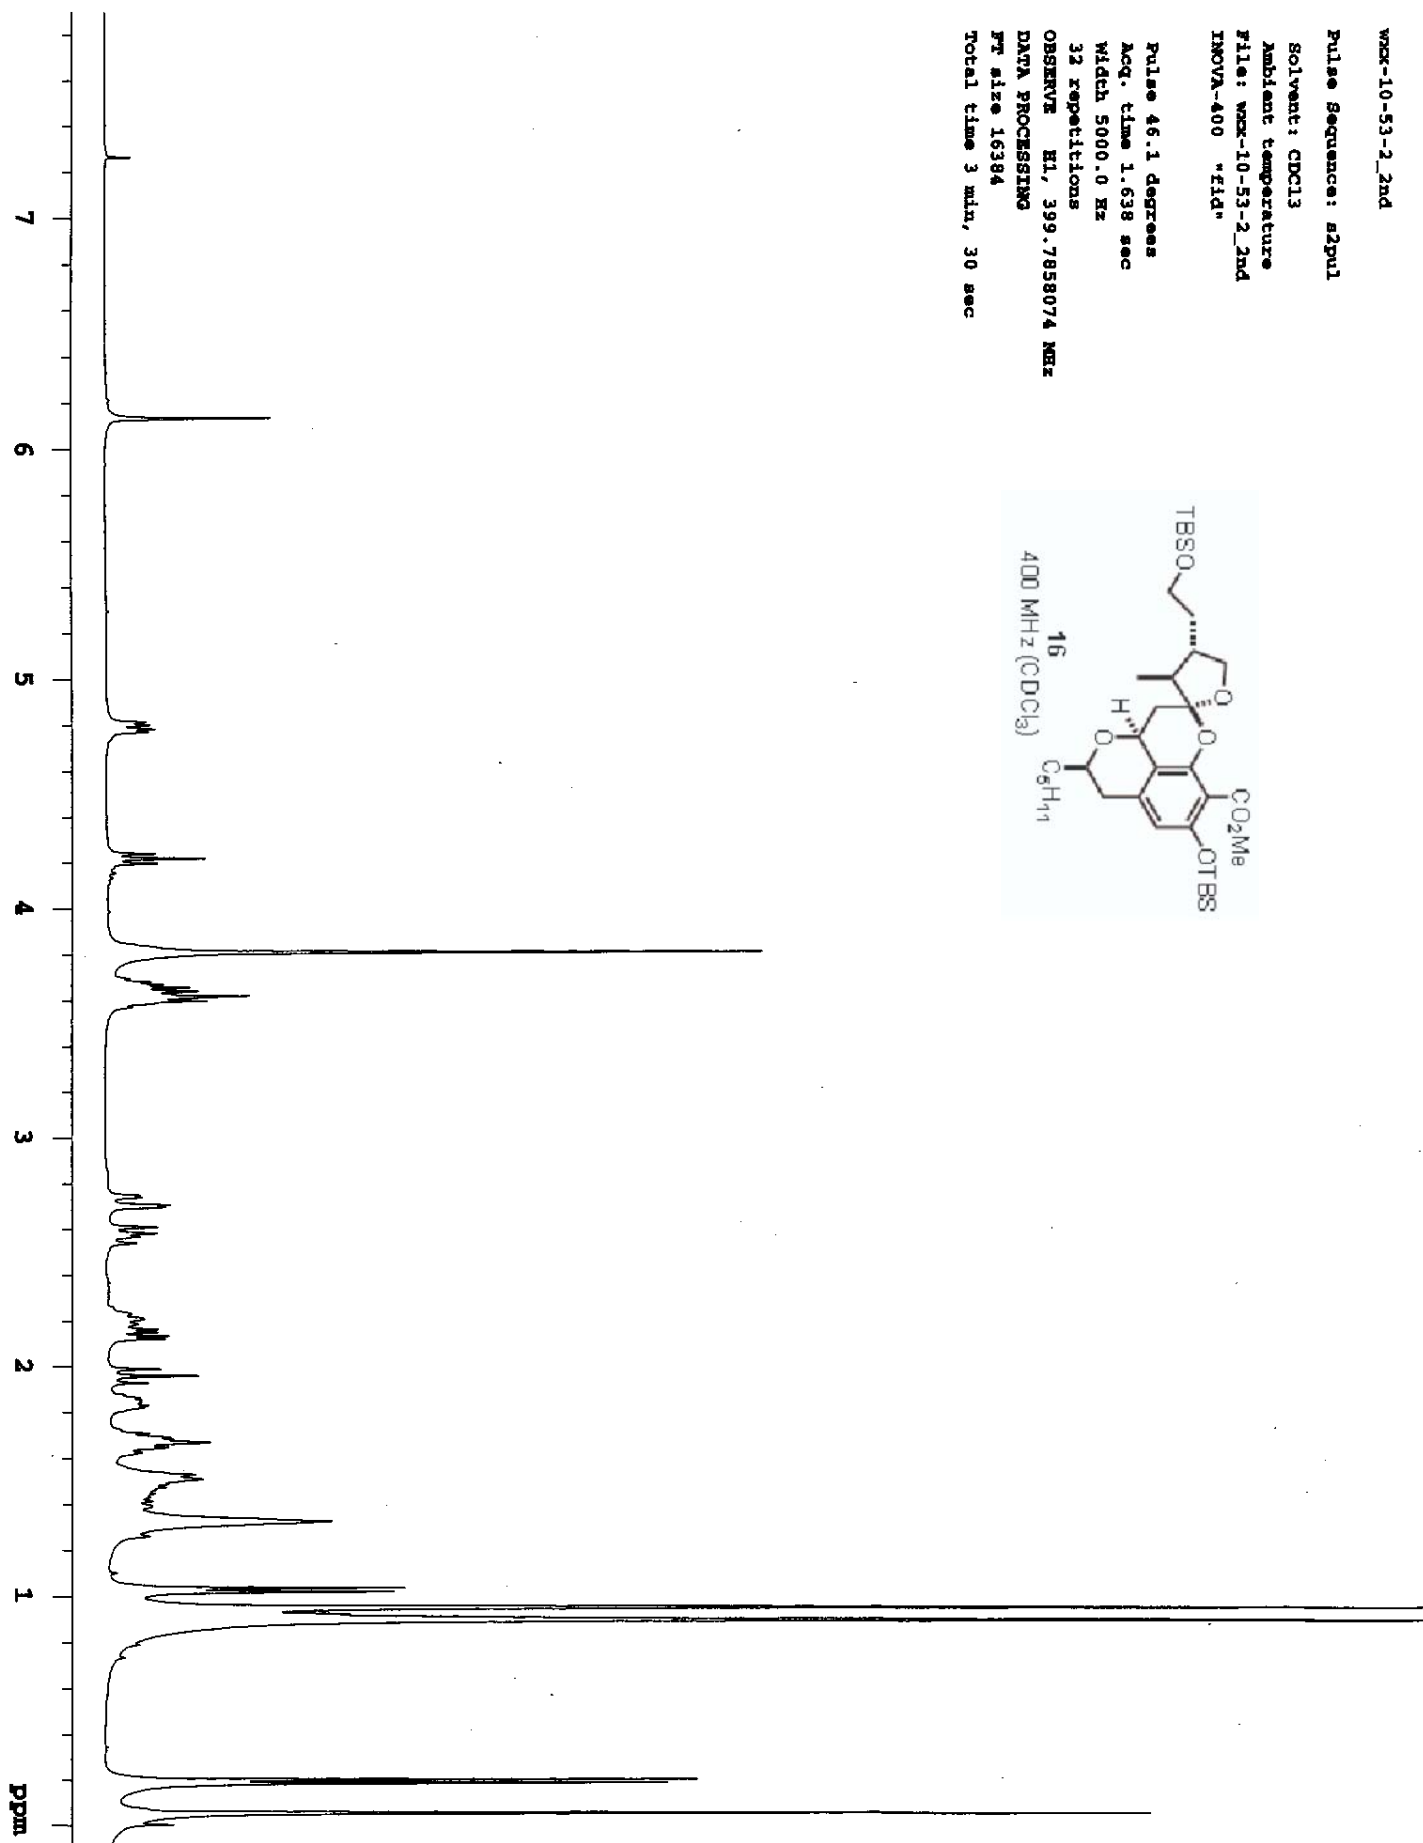

WX-10-53-2 C

| INDEX | FREQUENCY | PPM     | HEIGHT |
|-------|-----------|---------|--------|
| 1     | 16733.524 | 166.449 | 21.0   |
| 2     | 15317.271 | 152.371 | 19.7   |
| 3     | 14982.341 | 149.039 | 16.7   |
| 4     | 13618.968 | 135.477 | 35.0   |
| 5     | 11513.255 | 114.530 | 24.3   |
| 6     | 11268.351 | 112.094 | 12.1   |
| 7     | 11108.134 | 110.500 | 52.7   |
| 8     | 10914.347 | 108.572 | 37.9   |
| 9     | 7772.563  | 77.319  | 53.2   |
| 10    | 7740.519  | 77.000  | 57.3   |
| 11    | 7708.476  | 76.681  | 58.2   |
| 12    | 7571.147  | 75.315  | 53.5   |
| 13    | 7366.679  | 73.281  | 51.7   |
| 14    | 6854.747  | 68.189  | 56.2   |
| 15    | 6257.365  | 62.246  | 60.0   |
| 16    | 5193.827  | 51.666  | 54.2   |
| 17    | 4916.880  | 48.911  | 60.4   |
| 18    | 4158.519  | 41.367  | 65.9   |
| 19    | 3651.164  | 36.331  | 63.2   |
| 20    | 3603.862  | 35.850  | 55.4   |
| 21    | 3474.925  | 34.567  | 49.7   |
| 22    | 3432.963  | 34.150  | 53.6   |
| 23    | 3194.926  | 31.782  | 76.3   |
| 24    | 2601.359  | 25.877  | 223.2  |
| 25    | 2559.397  | 25.460  | 225.2  |
| 26    | 2525.828  | 25.126  | 74.7   |
| 27    | 2272.532  | 22.606  | 72.4   |
| 28    | 1827.739  | 18.182  | 22.0   |
| 29    | 1806.376  | 17.969  | 32.8   |
| 30    | 1410.411  | 14.030  | 62.3   |
| 31    | 1166.270  | 11.602  | 61.4   |
| 32    | -437.429  | -4.351  | 40.7   |
| 33    | -452.687  | -4.503  | 41.4   |
| 34    | -546.529  | -5.437  | 51.5   |
| 35    | -549.581  | -5.467  | 42.8   |

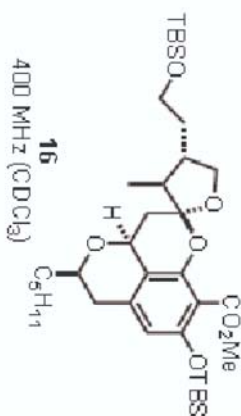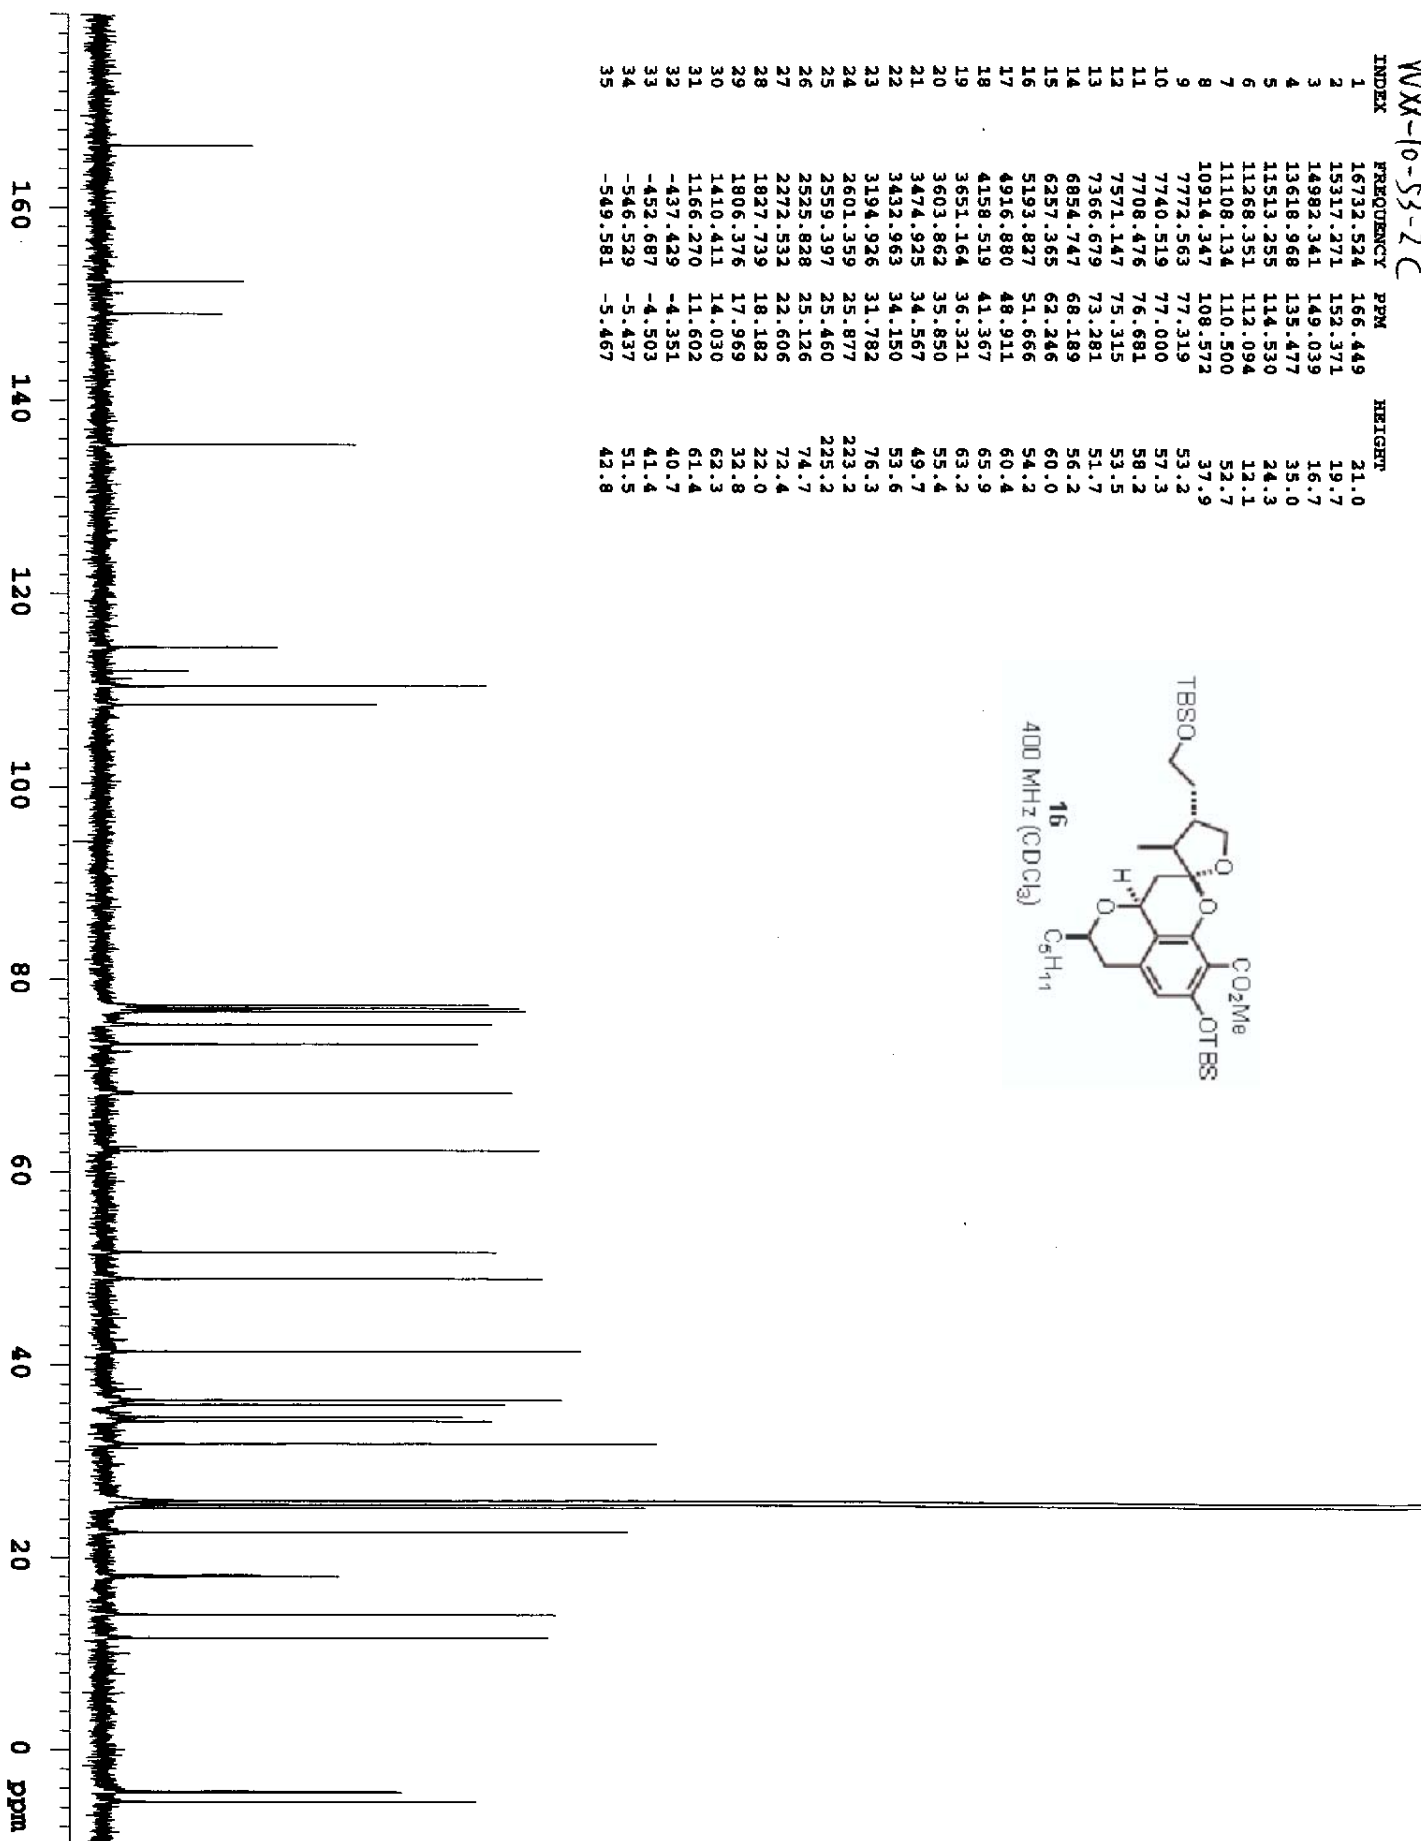



WCK-10-53-2

Pulse Sequence: gcosy

Solvent: CDCl3

Ambient temperature

INOVA-400 "fid"

Relax. delay 1.000 sec

Acq. time 0.205 sec

Width 5000.0 Hz

2D Width 5000.0 Hz

Single scan

128 increments

OBSERVE H1, 399.7858058 MHz

DATA PROCESSING

Sq. sine bell 0.102 sec

F1 DATA PROCESSING

Sq. sine bell 0.026 sec

FT size 2048 x 2048

Total time 2 min, 56 sec

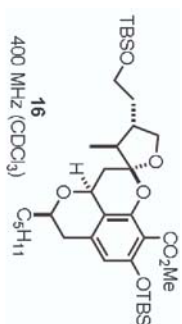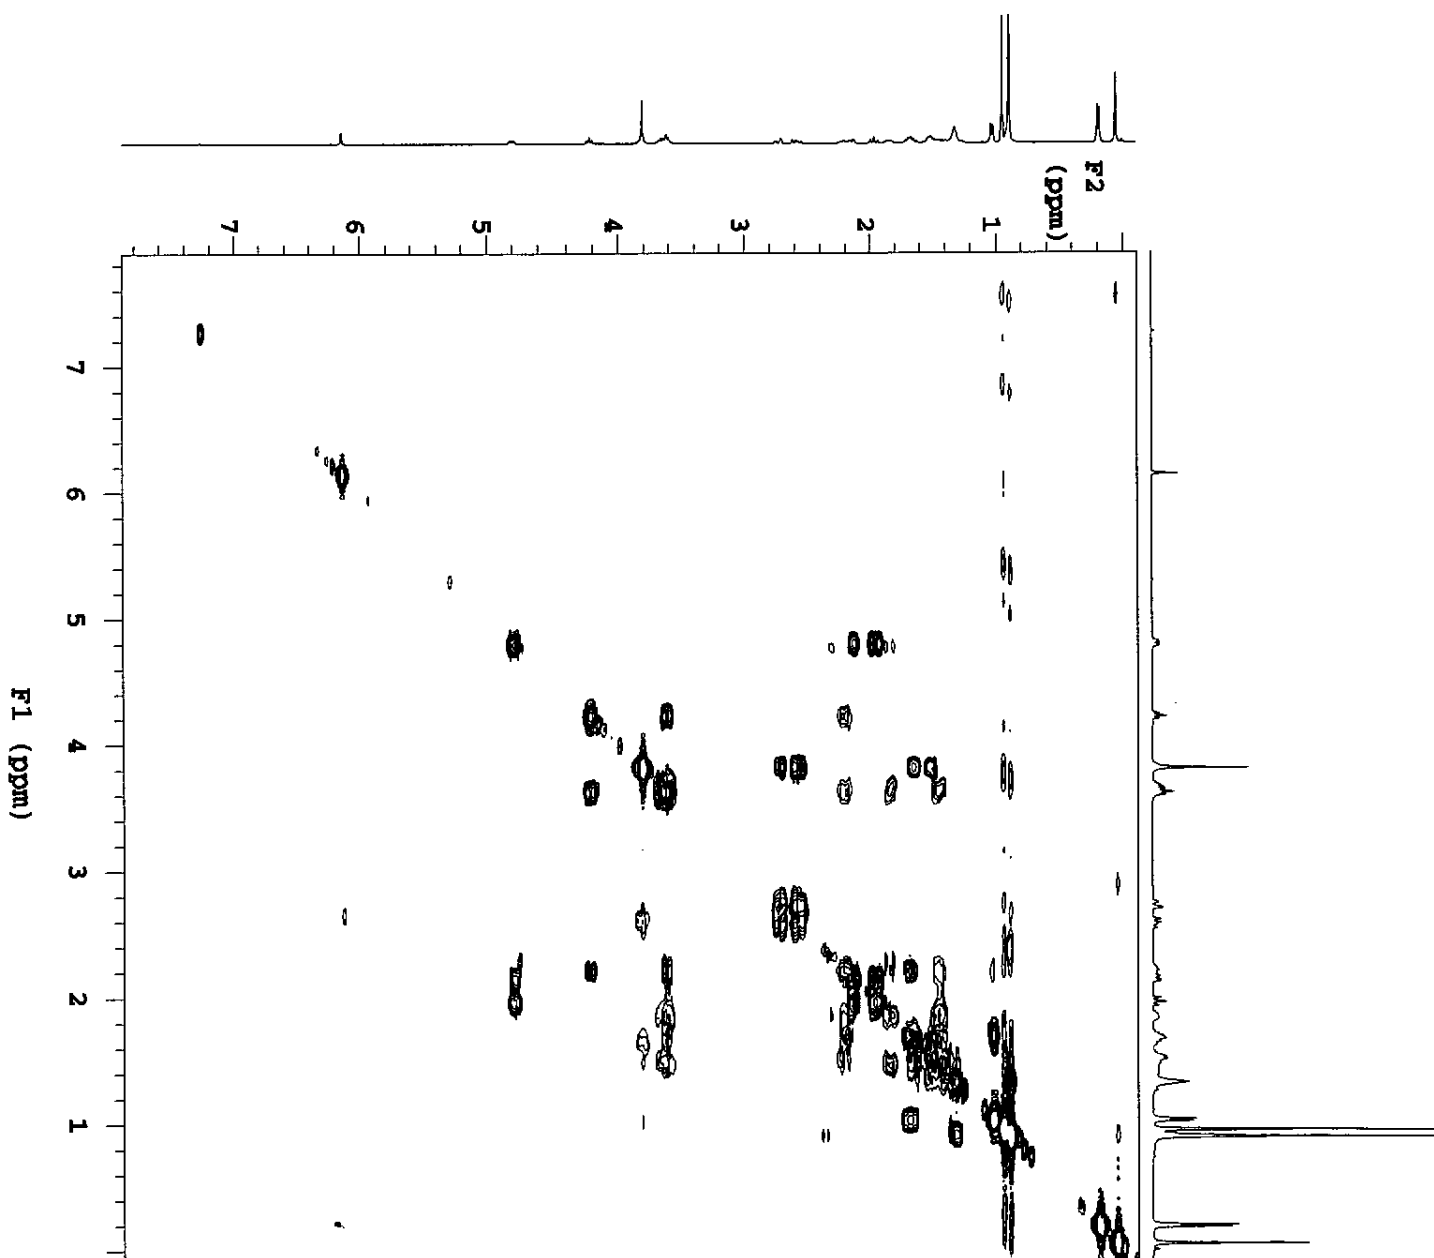

wkx-10-55-3

Pulse Sequence: s2pul

Solvent: CDCl3

Ambient temperature

File: wkx-10-55-3

INOVA-500 "gambie"

Pulse 46.1 degrees

Acq. time 1.638 sec

Width 5000.0 Hz

65 repetitions

OBSERVE H1, 399.7857971 MHz

DATA PROCESSING

FT size 16384

Total time 3 min, 31 sec

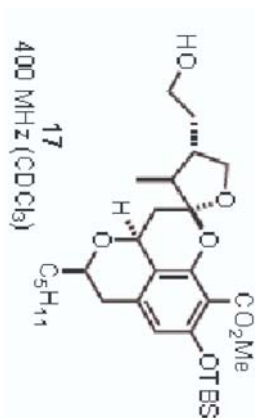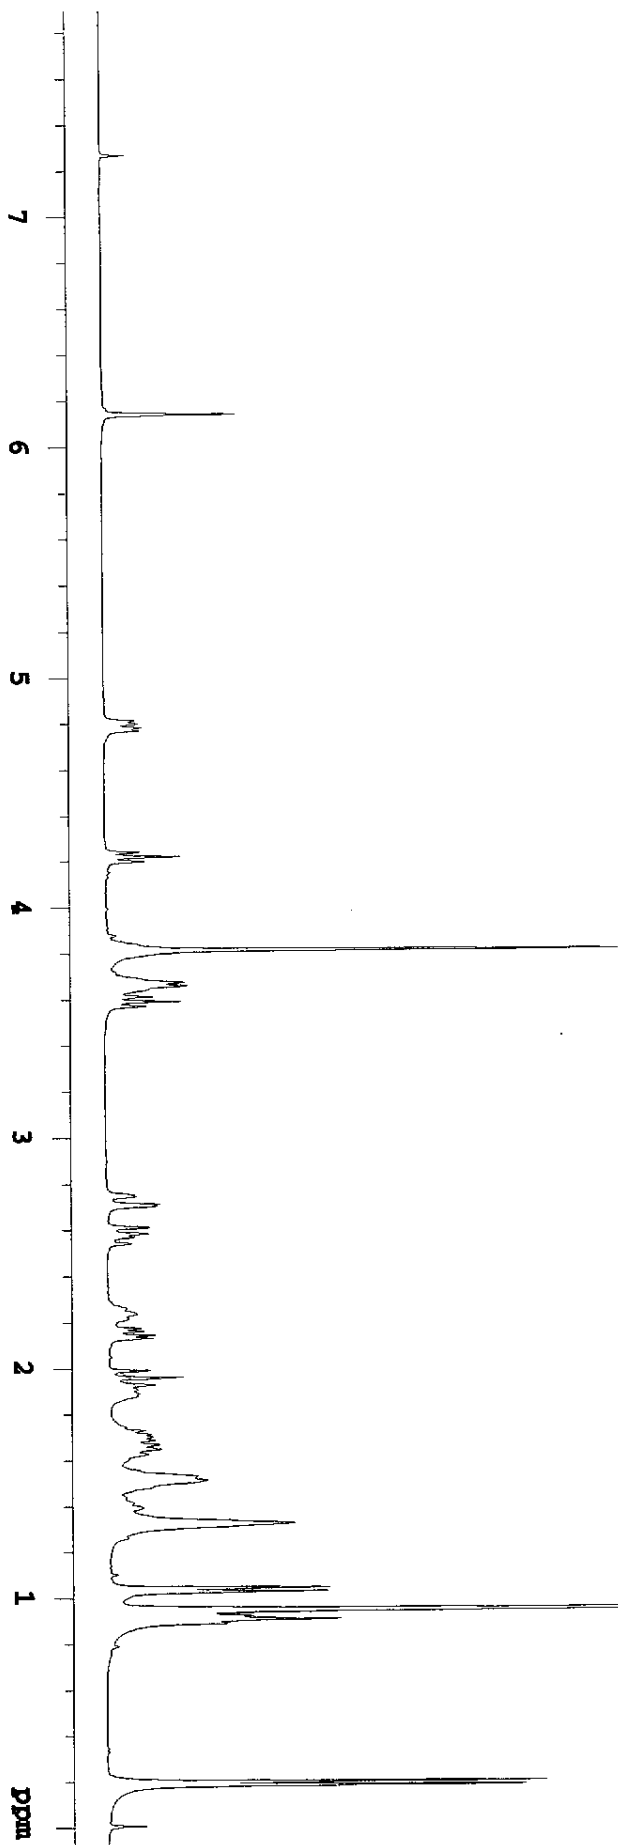

NXX-10-55-3C

| INDEX | FREQUENCY | PPM     | HEIGHT |
|-------|-----------|---------|--------|
| 1     | 16740.153 | 166.525 | 13.3   |
| 2     | 15320.323 | 152.401 | 26.0   |
| 3     | 14978.526 | 149.001 | 15.9   |
| 4     | 13625.834 | 135.545 | 27.9   |
| 5     | 11511.729 | 114.515 | 24.3   |
| 6     | 11363.011 | 112.041 | 15.3   |
| 7     | 11115.763 | 110.576 | 46.8   |
| 8     | 10929.606 | 108.724 | 44.5   |
| 9     | 7772.563  | 77.319  | 74.4   |
| 10    | 7740.519  | 77.000  | 79.7   |
| 11    | 7708.476  | 76.681  | 78.5   |
| 12    | 7572.673  | 75.330  | 45.4   |
| 13    | 7326.243  | 72.879  | 44.8   |
| 14    | 6850.169  | 68.143  | 47.9   |
| 15    | 6212.352  | 61.798  | 40.0   |
| 16    | 5202.220  | 51.750  | 47.7   |
| 17    | 4915.354  | 48.896  | 52.5   |
| 18    | 4097.483  | 40.760  | 57.2   |
| 19    | 3651.164  | 36.321  | 53.5   |
| 20    | 3584.788  | 35.660  | 45.1   |
| 21    | 3468.058  | 34.499  | 44.1   |
| 22    | 3430.674  | 34.127  | 44.4   |
| 23    | 3194.926  | 31.782  | 68.5   |
| 24    | 2558.635  | 25.452  | 196.0  |
| 25    | 2525.065  | 25.118  | 60.3   |
| 26    | 2271.769  | 22.599  | 59.7   |
| 27    | 1807.139  | 17.977  | 28.1   |
| 28    | 1410.411  | 14.030  | 55.7   |
| 29    | 1172.374  | 11.662  | 49.9   |
| 30    | -438.192  | -4.359  | 40.8   |
| 31    | -452.687  | -4.503  | 33.5   |

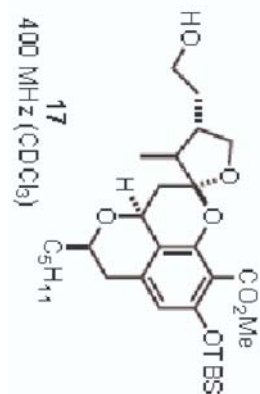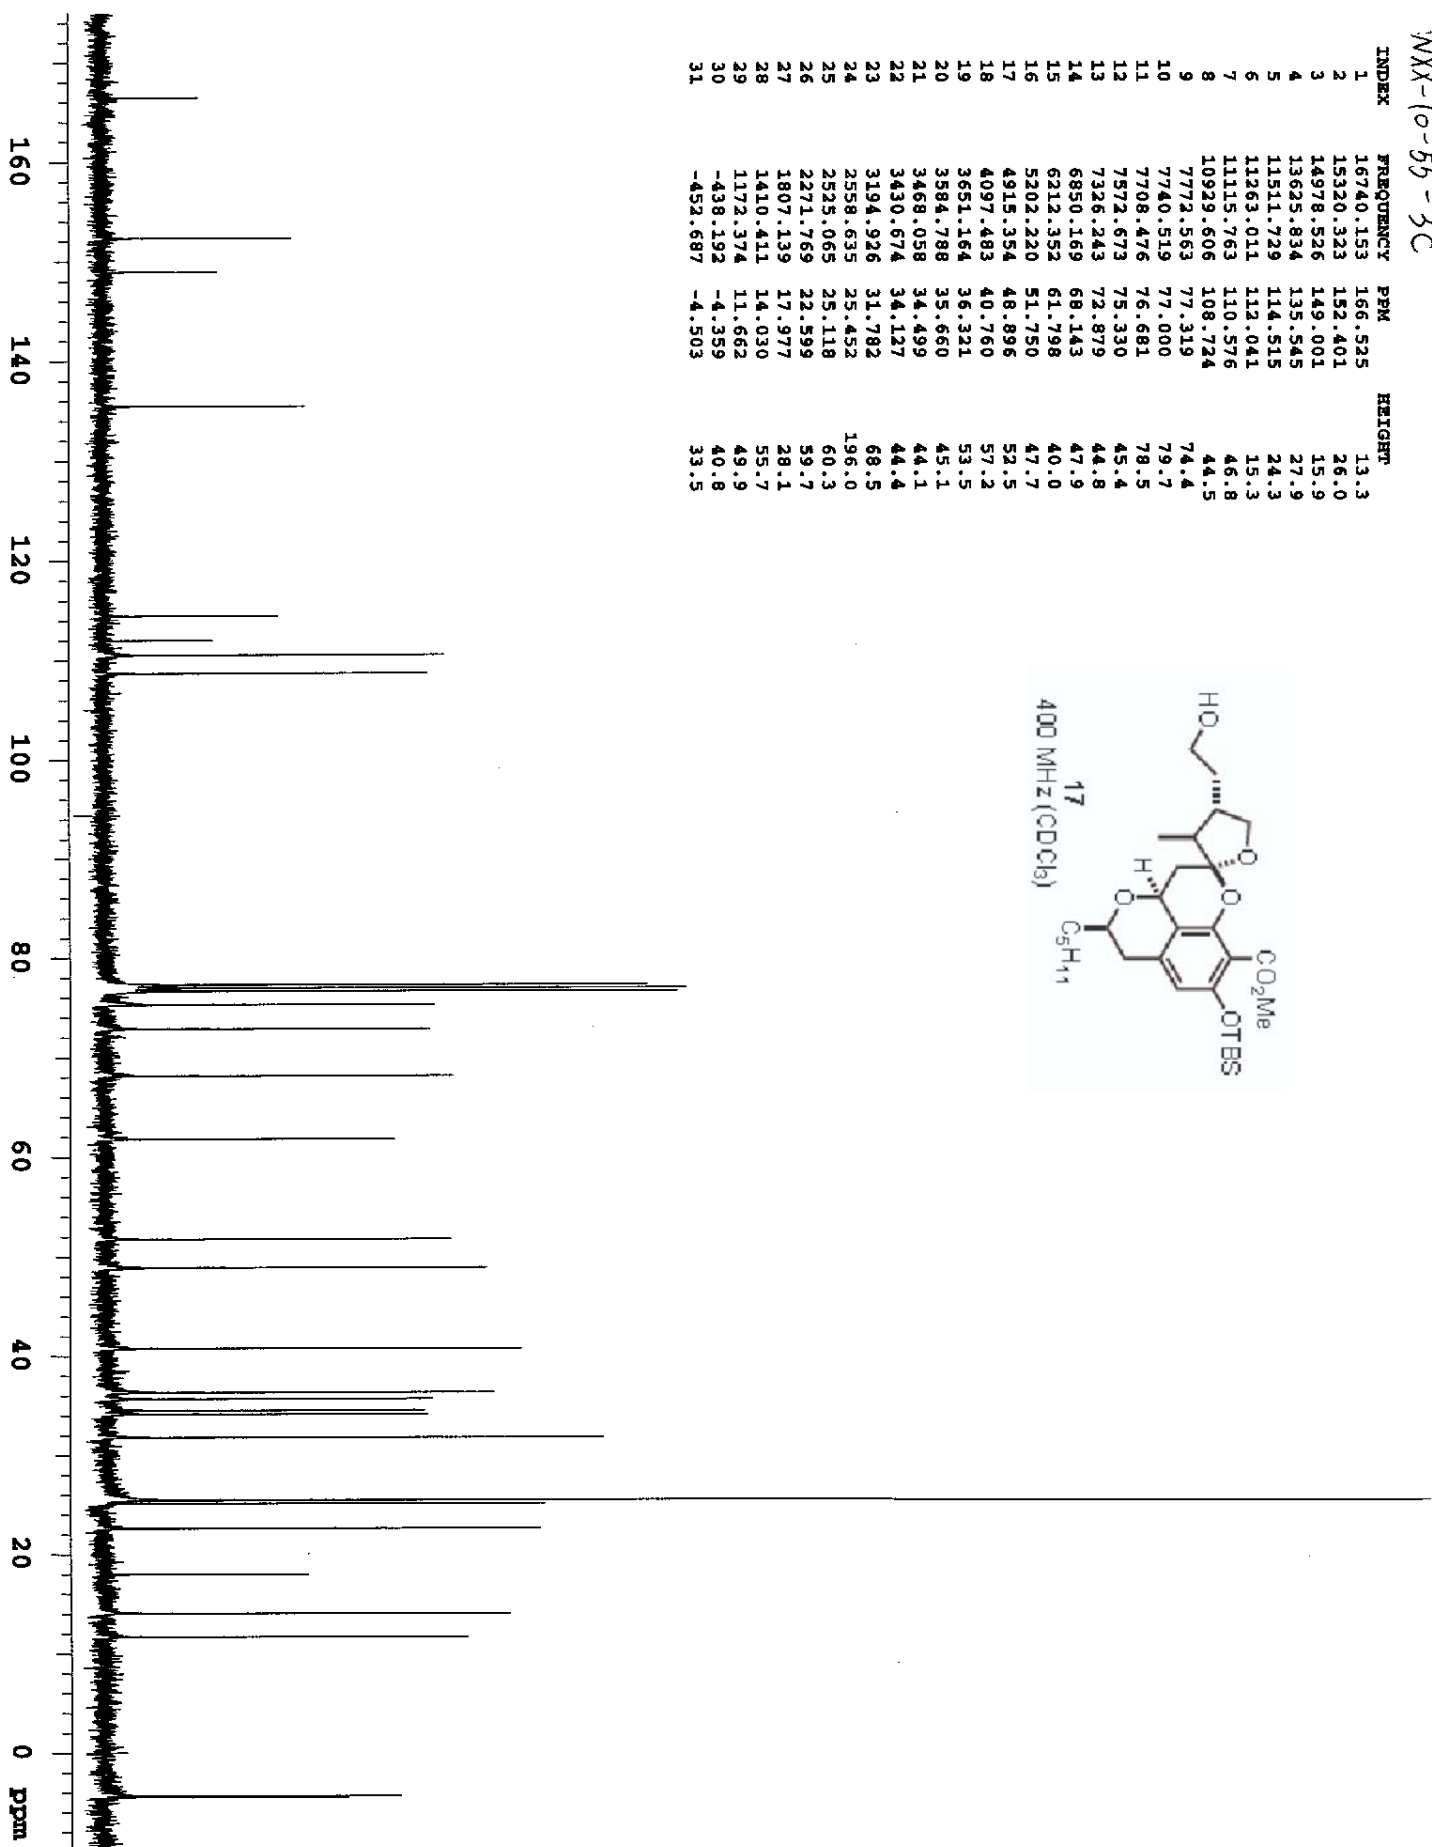

WXR-10-55-3

Pulse Sequence: gCOSY

Solvent: CDCl<sub>3</sub>

Ambient temperature

INOVA-400 "F1d"

Relax. delay 1.000 sec

Acq. time 0.205 sec

Width 5000.0 Hz

2D Width 5000.0 Hz

Single scan

128 increments

OBSERVE H1, 399.7858062 MHz

DATA PROCESSING

Sq. sine bell 0.102 sec

F1 DATA PROCESSING

Sq. sine bell 0.026 sec

FT size 2048 x 2048

Total time 2 min, 56 sec

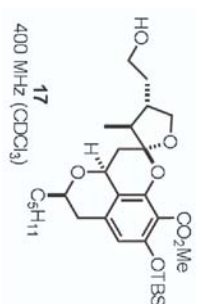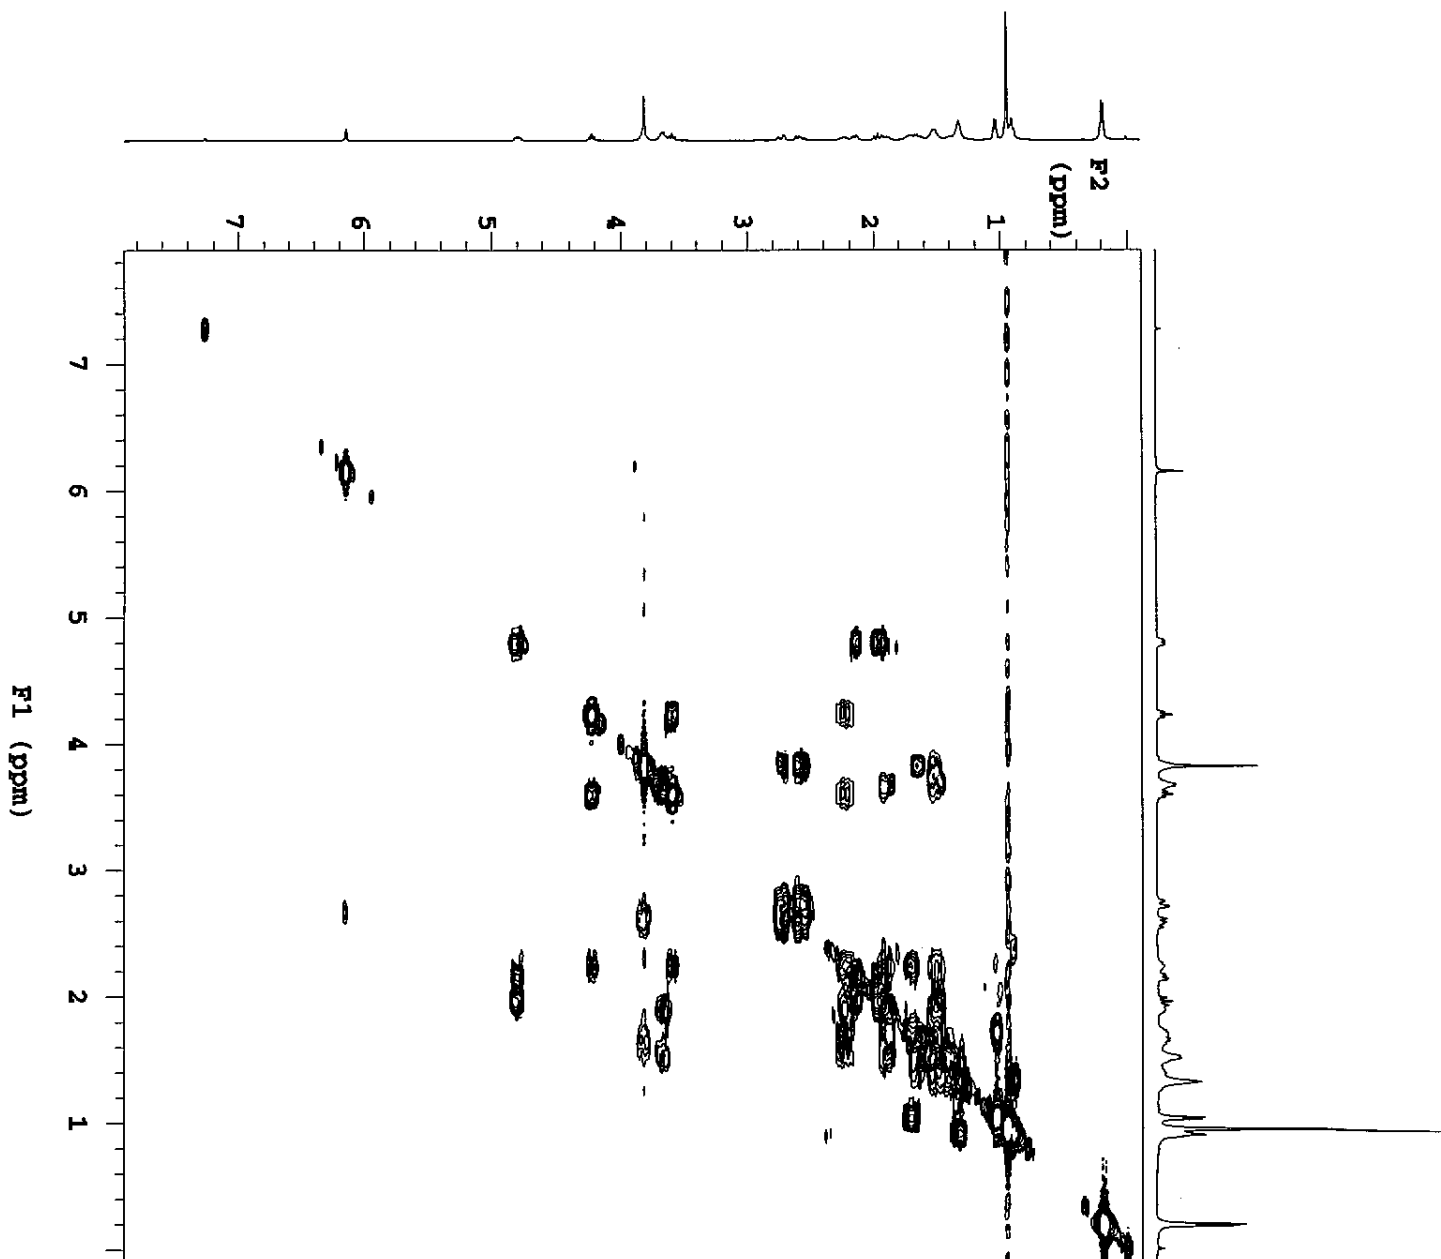

wzck-10-61-2

Pulse Sequence: s2pul1

SOLVENT: CDCl3

Ambient temperature

File: wzck-10-61-2

INOVA-500 "gambler"

Pulse 46.1 degrees

Acq. time 1.638 sec

Width 5000.0 Hz

27 repetitions

OBSERVE H1, 399.7857971 MHz

DATA PROCESSING

FT size 16384

Total time 3 min, 31 sec

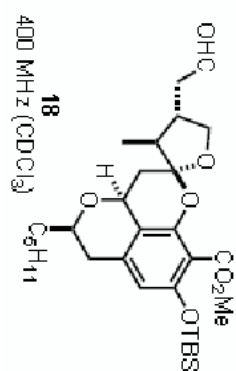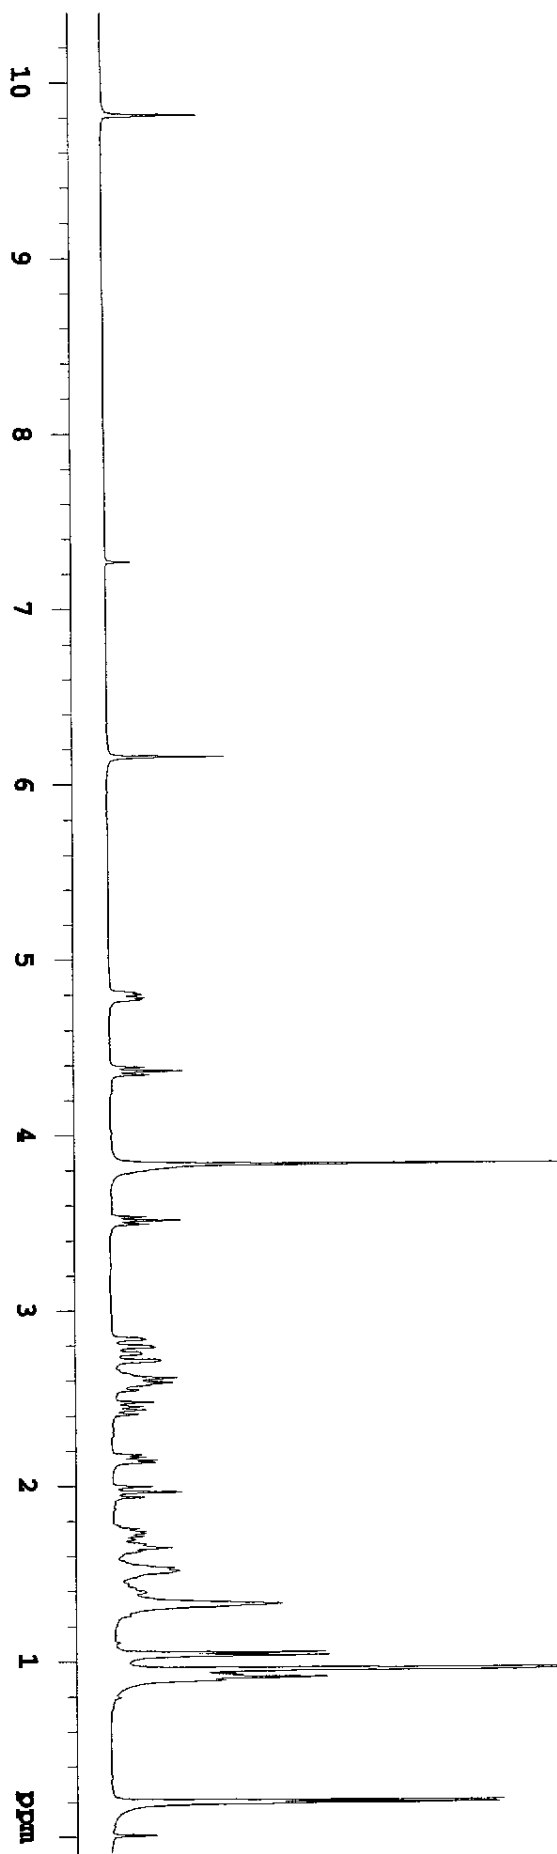

WXX-10-61-2c

| INDEX | FREQUENCY | PPM     | HEIGHT |
|-------|-----------|---------|--------|
| 1     | 20169.566 | 200.640 | 43.8   |
| 2     | 16724.894 | 166.373 | 15.2   |
| 3     | 15327.952 | 152.477 | 22.4   |
| 4     | 14961.741 | 148.834 | 20.6   |
| 5     | 13627.360 | 135.560 | 32.9   |
| 6     | 11501.048 | 114.408 | 26.5   |
| 7     | 11269.114 | 112.101 | 17.4   |
| 8     | 11132.548 | 110.743 | 44.4   |
| 9     | 10890.696 | 108.337 | 34.8   |
| 10    | 7772.563  | 77.319  | 91.7   |
| 11    | 7740.519  | 77.000  | 94.3   |
| 12    | 7708.476  | 76.681  | 94.2   |
| 13    | 7573.436  | 75.338  | 45.5   |
| 14    | 7253.001  | 72.150  | 44.0   |
| 15    | 6840.251  | 68.044  | 46.8   |
| 16    | 5206.797  | 51.795  | 44.1   |
| 17    | 4872.630  | 48.471  | 52.8   |
| 18    | 4748.271  | 47.234  | 56.3   |
| 19    | 3793.834  | 37.740  | 55.7   |
| 20    | 3650.401  | 36.313  | 53.0   |
| 21    | 3452.800  | 34.347  | 43.1   |
| 22    | 3427.623  | 34.097  | 44.3   |
| 23    | 3194.926  | 31.782  | 56.2   |
| 24    | 2558.635  | 25.452  | 187.1  |
| 25    | 2524.302  | 25.111  | 55.9   |
| 26    | 2271.769  | 22.599  | 58.7   |
| 27    | 1807.139  | 17.977  | 34.9   |
| 28    | 1410.411  | 14.030  | 50.2   |
| 29    | 1158.641  | 11.526  | 50.9   |
| 30    | -438.192  | -4.359  | 37.8   |
| 31    | -451.925  | -4.496  | 35.6   |

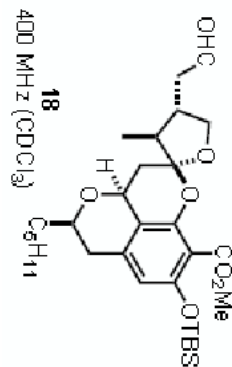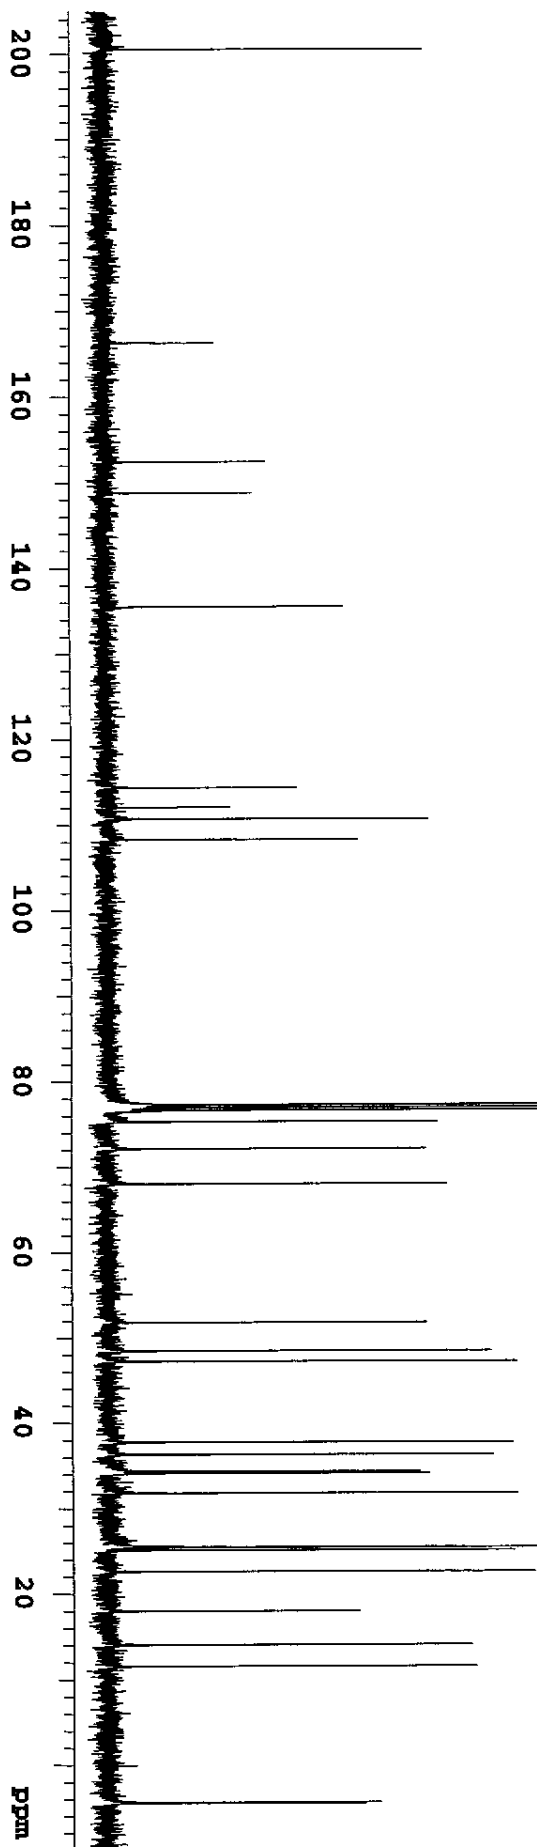

vxxk-10-61-2

Pulse Sequence: gCOSY

Solvent: CDCl<sub>3</sub>

Ambient temperature

INOVA-400 "FID"

Relax. delay 1.000 sec

Acq. time 0.205 sec

Width 5000.0 Hz

2D Width 5000.0 Hz

Single scan

128 increments

OBSERVE H1, 399.7858068 MHz

DATA PROCESSING

Sq. sine bell 0.102 sec

F1 DATA PROCESSING

Sq. sine bell 0.026 sec

FT size 2048 x 2048

Total time 2 min, 56 sec

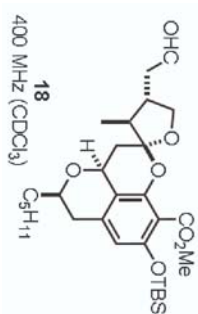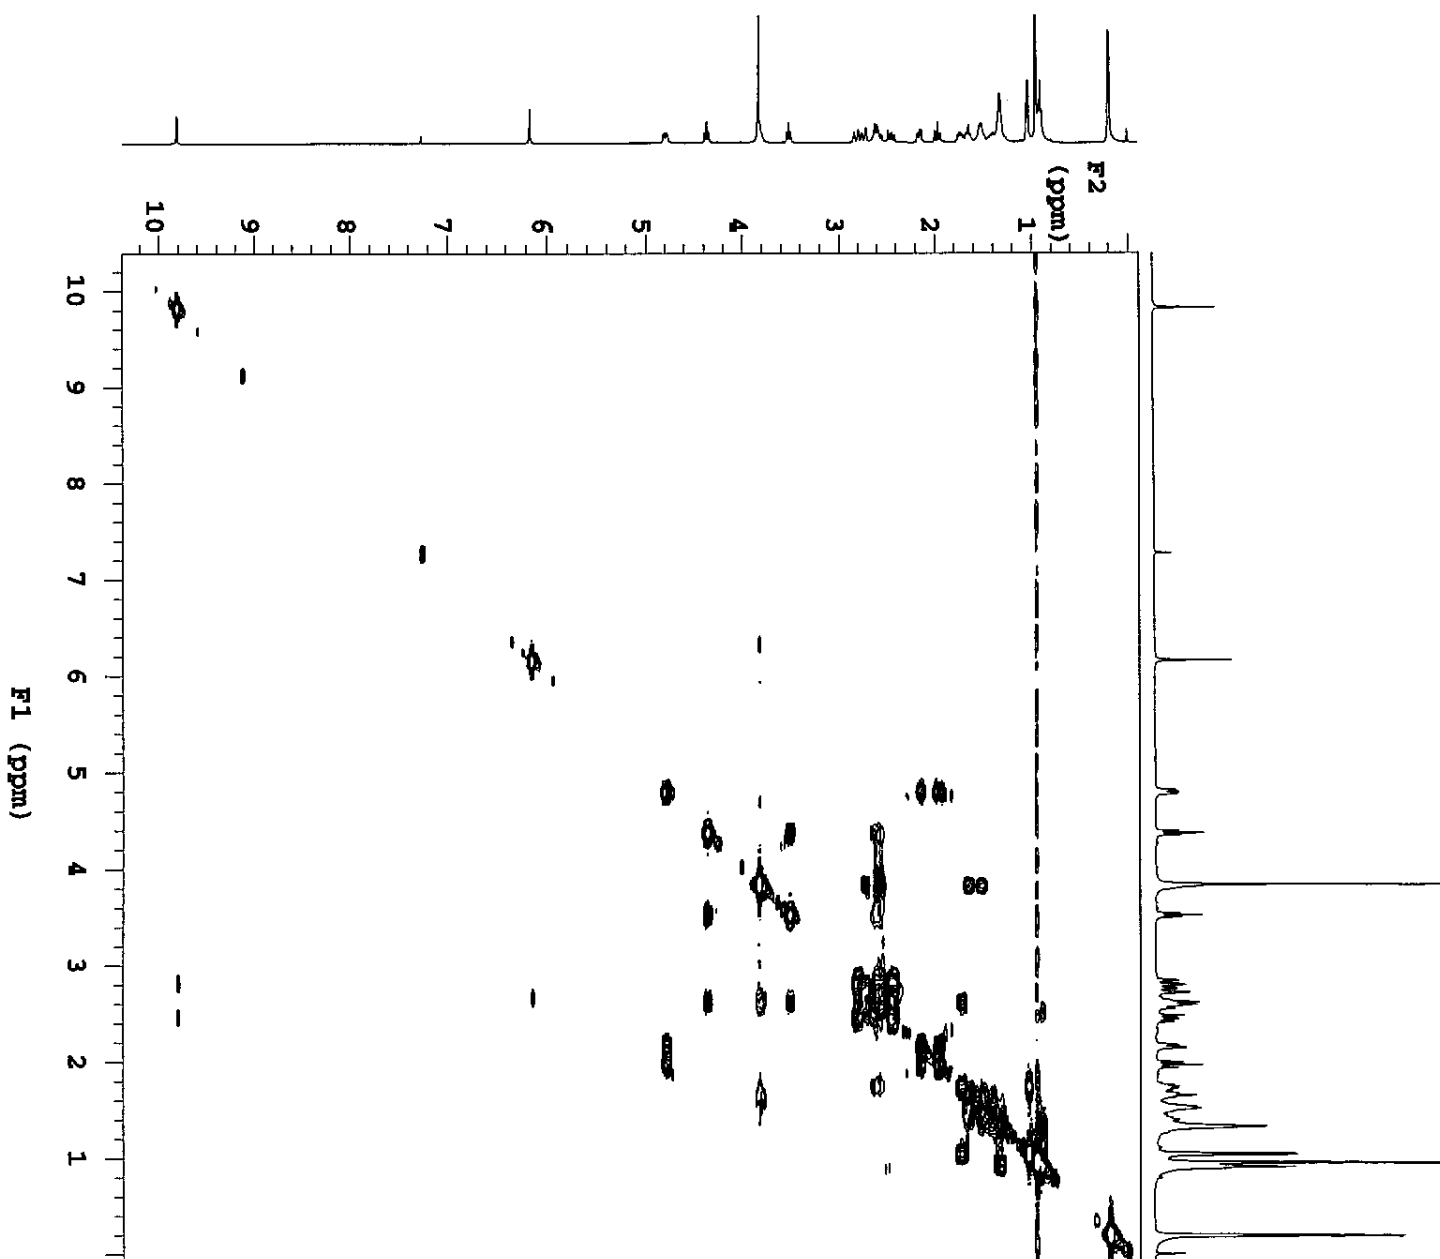

WXR-10-149-3

Pulse sequence: s2pul

Solvent: CDCl3

Ambient temperature

File: WXR-10-149-3

INOVA-400 "cosy"

Pulse 46.1 degrees

Acq. time 1.638 sec

Width 5000.0 Hz

28 repetitions

OBSERVE K1, 399.7858093 MHz

DATA PROCESSING

FT size 16384

Total time 3 min, 30 sec

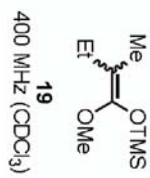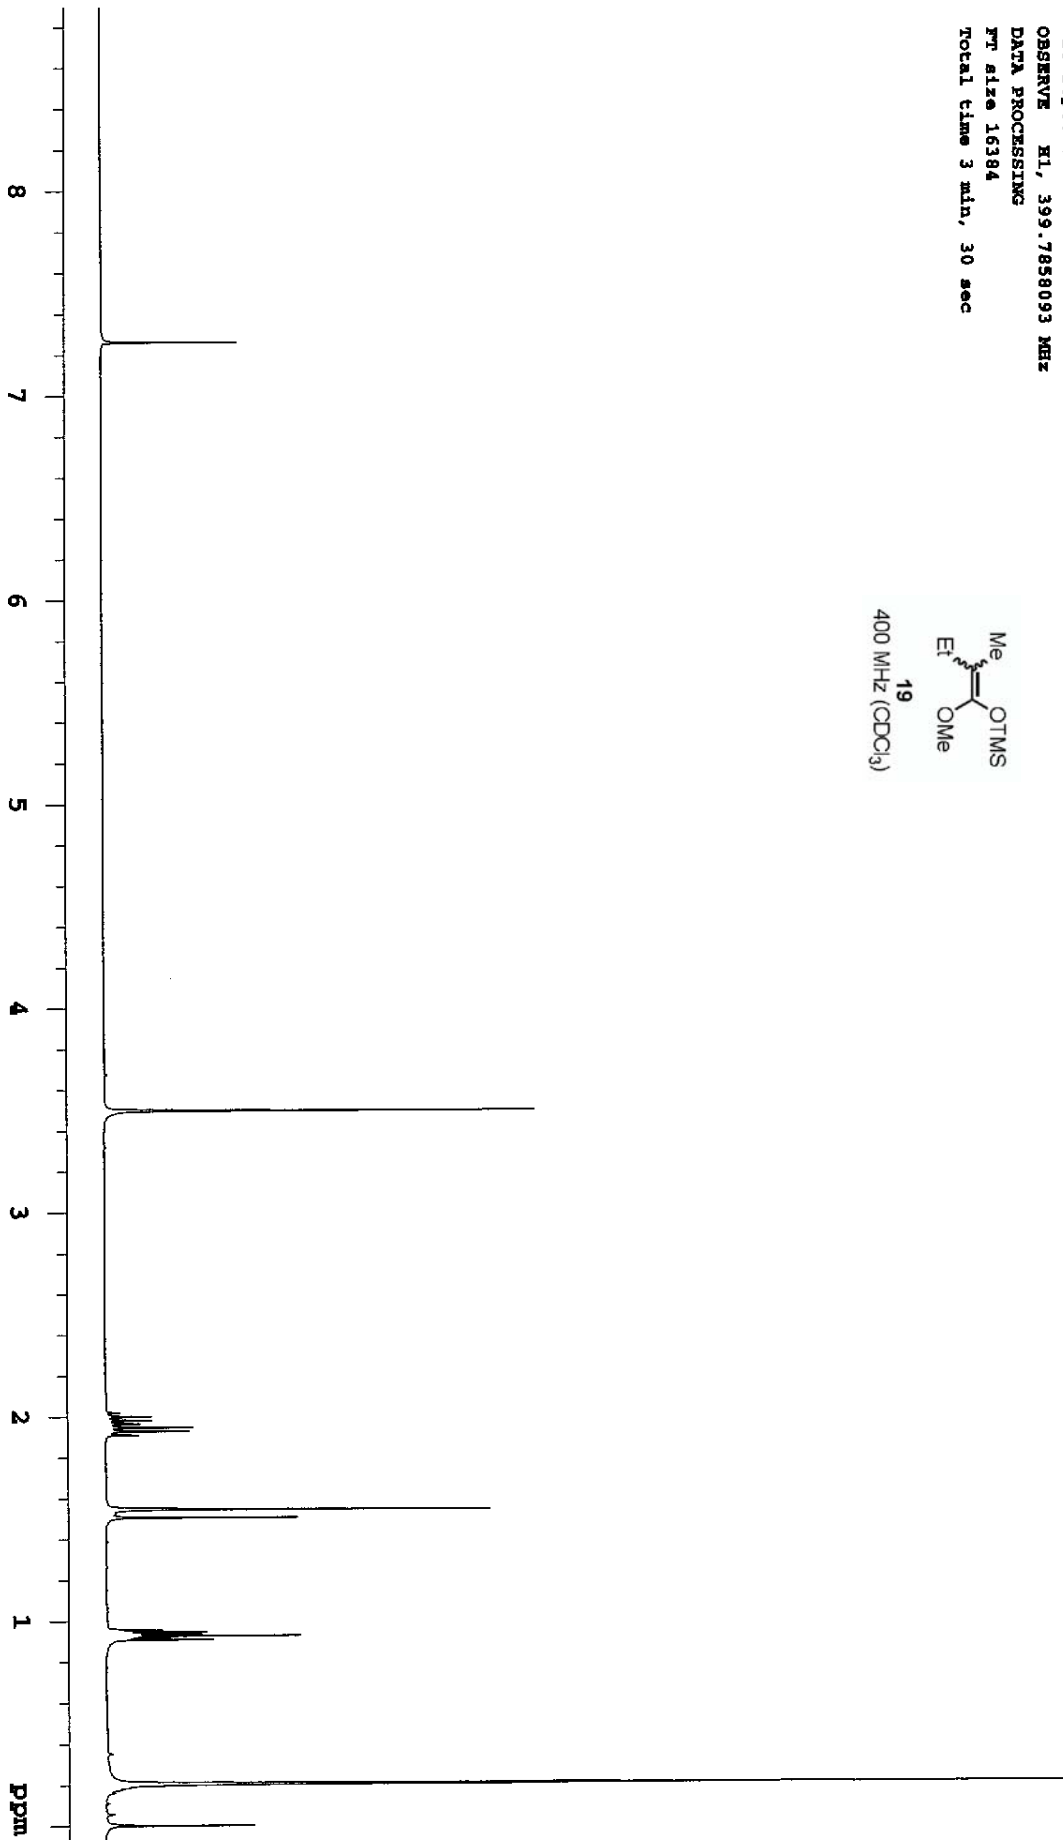



wxc-10-63-3

Pulse Sequence: s2pu1

Solvent: CDCl3

Ambient temperature

File: wxc-10-63-3

INOVA-500 "gamb1e"

Pulse 46.1 degrees

Acq. time 1.638 sec

Width 5000.0 Hz

74 repetitions

OBSERVE H1, 399.7857971 MHz

DATA PROCESSING

FF size 16384

Total time 13 min, 44 sec

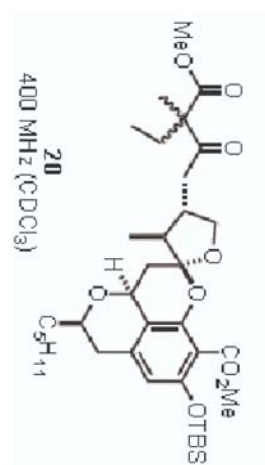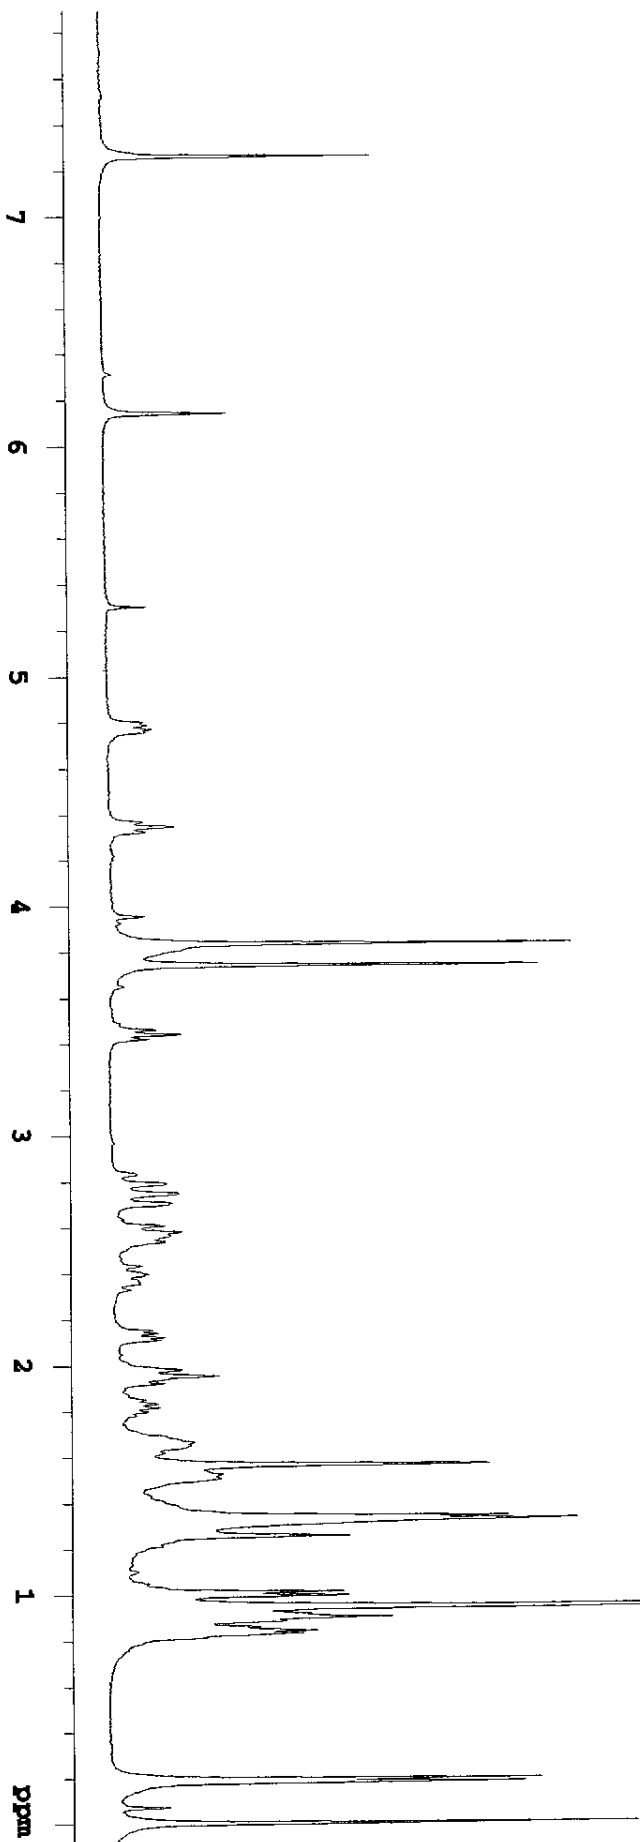

wkx-10-63-3

Pulse Sequence: gcosy

Solvent: CDCl3

Ambient temperature

File: wkx-10-63-3COSY

INOVA-400 "cosy"

Relax. delay 1.000 sec

Acq. time 0.205 sec

Width 5000.0 Hz

2D Width 5000.0 Hz

6 repetitions

256 increments

OBSERVE H1, 399.7858092 MHz

DATA PROCESSING

Sq. sine bell 0.102 sec

F1 DATA PROCESSING

Sq. sine bell 0.026 sec

F1 size 2048 x 2048

Total time 0 min, -1 sec

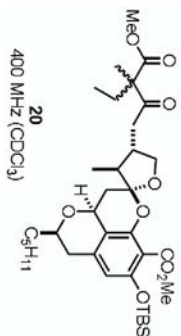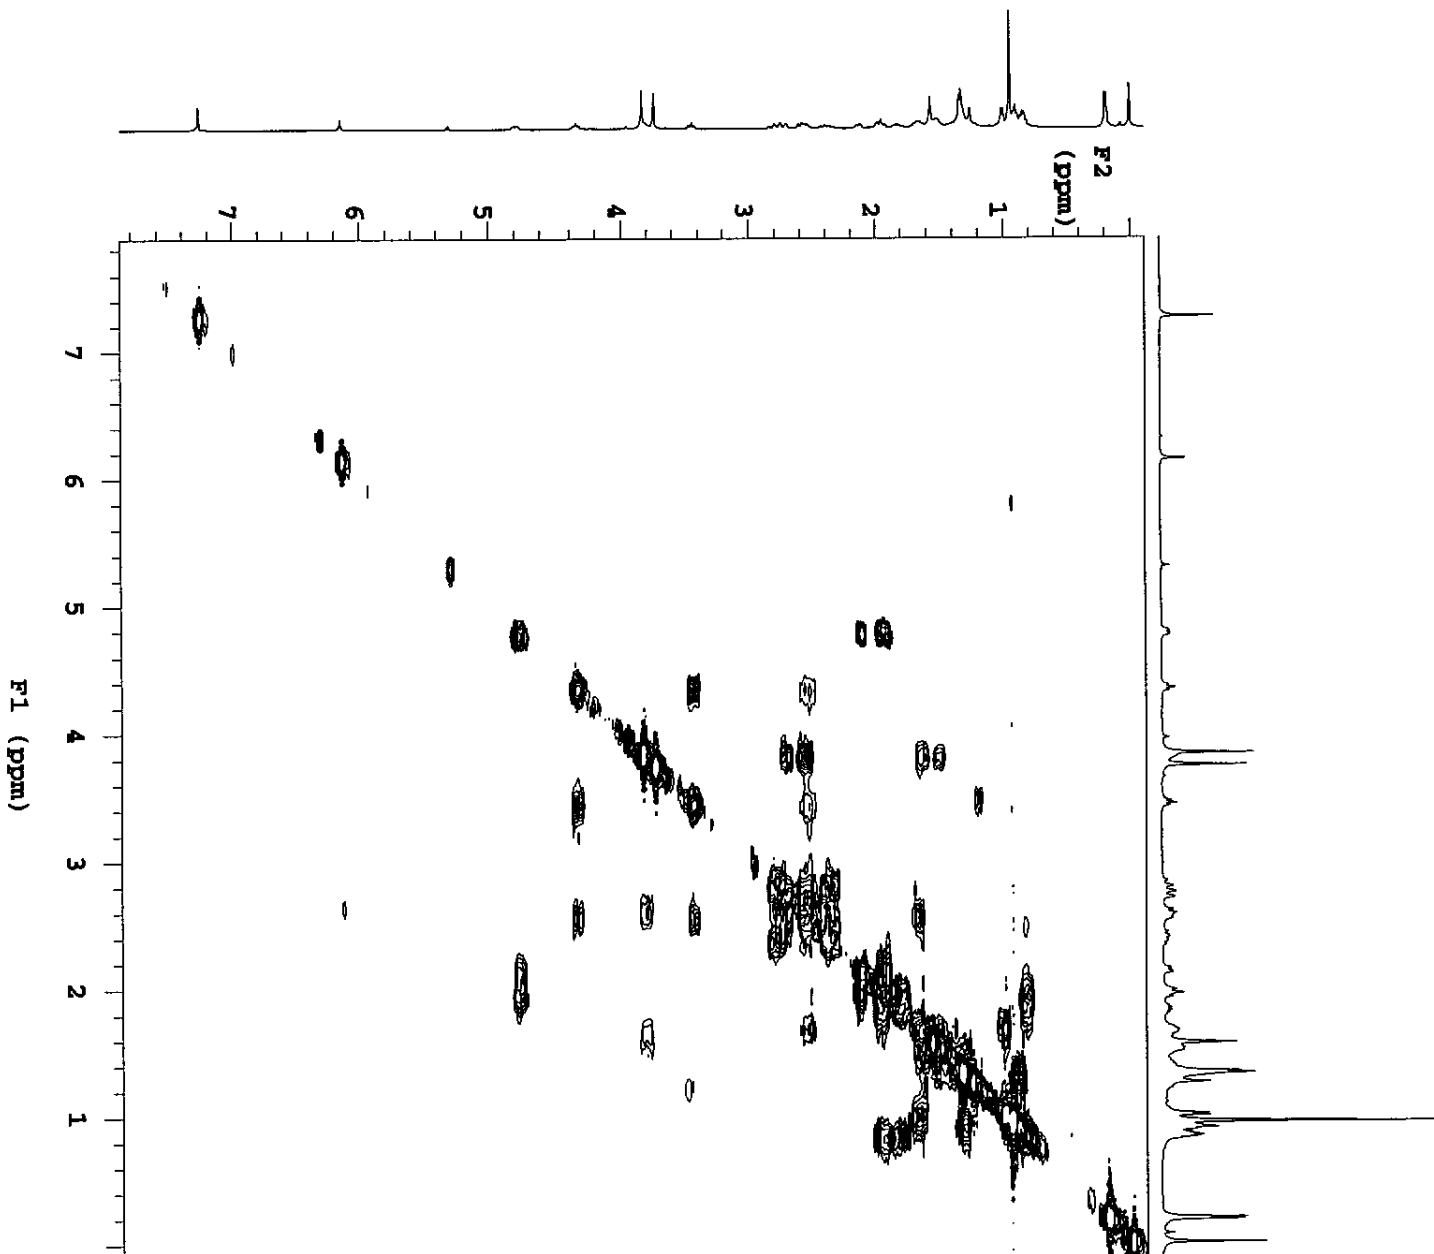

wack-10-71-2

Pulse Sequence: zgpg30

Solvent: CDCl3

Ambient temperature

File: wack-10-71-2

INOVA-500 "gambler"

Pulse 46.1 degrees

Acq. time 1.638 sec

Width 8000.0 Hz

371 repetitions

OBSERVE H1, 399.7858276 MHz

DATA PROCESSING

FT size 32768

Total time 13 min, 44 sec

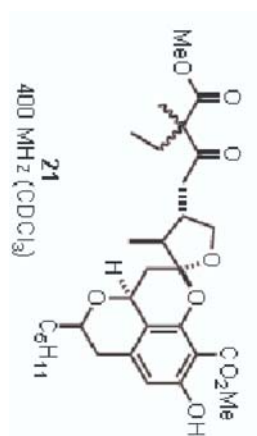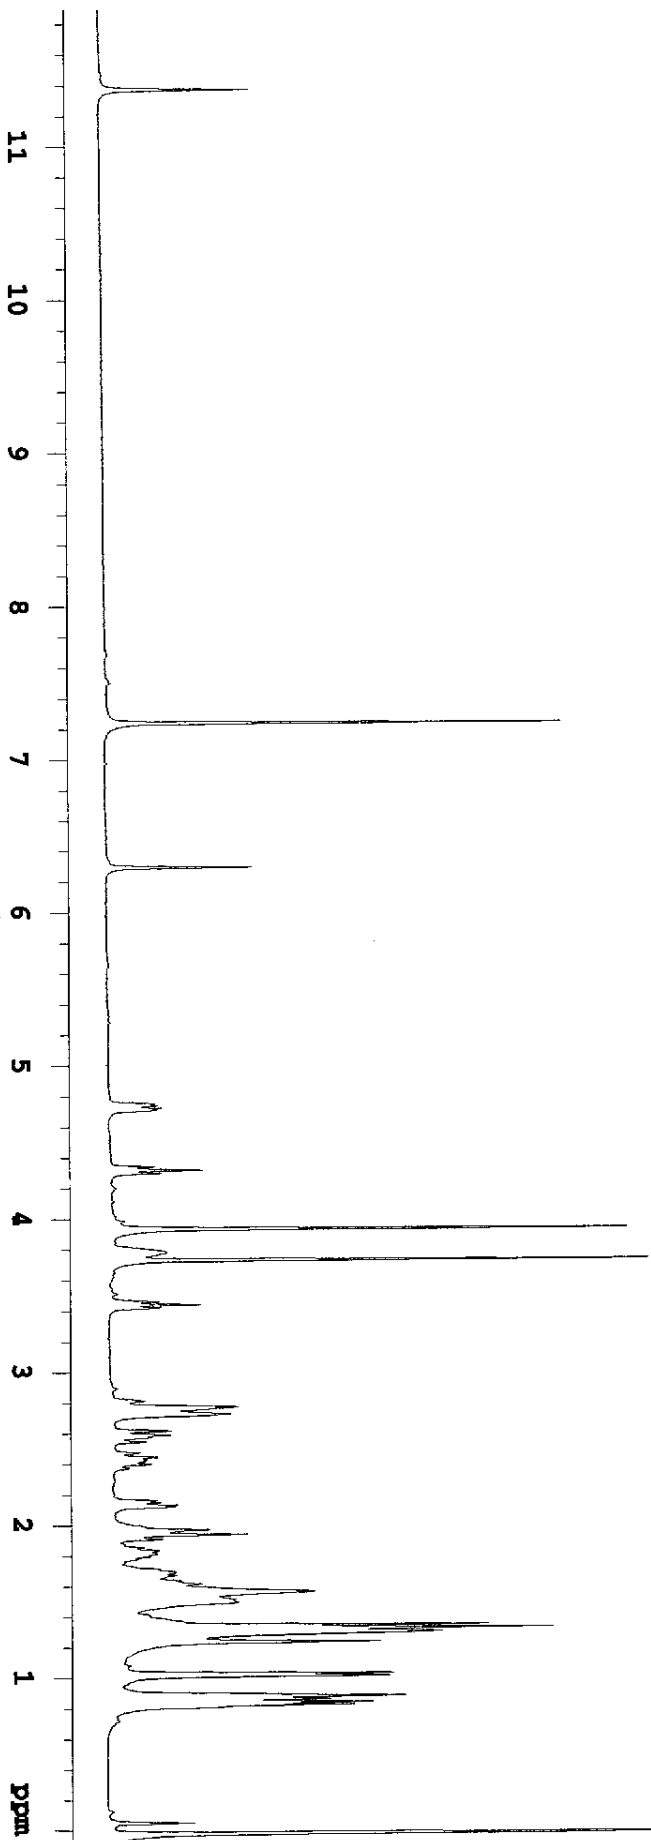

WX-10-71-2C

| INDEX | FREQUENCY | PPM     | HEIGHT |
|-------|-----------|---------|--------|
| 1     | 21687.479 | 215.740 | -24.1  |
| 2     | 17350.850 | 171.605 | 27.5   |
| 3     | 16394.857 | 162.096 | 35.7   |
| 4     | 15271.725 | 151.918 | 29.2   |
| 5     | 14196.710 | 141.224 | 36.2   |
| 6     | 11311.185 | 112.520 | 33.1   |
| 7     | 10920.548 | 108.634 | 49.5   |
| 8     | 10898.422 | 108.414 | 68.0   |
| 9     | 10051.533 | 99.989  | 29.2   |
| 10    | 7772.563  | 77.319  | 2132.9 |
| 11    | 7740.519  | 77.000  | 2243.6 |
| 12    | 7708.475  | 76.681  | 2246.0 |
| 13    | 7550.542  | 75.110  | 68.9   |
| 14    | 7319.364  | 72.810  | 36.2   |
| 15    | 6847.853  | 68.120  | 67.9   |
| 16    | 6016.986  | 59.855  | 39.0   |
| 17    | 5270.809  | 52.432  | 57.3   |
| 18    | 5246.394  | 52.189  | 42.5   |
| 19    | 4857.283  | 48.319  | 47.9   |
| 20    | 4188.165  | 41.652  | 72.1   |
| 21    | 3911.972  | 38.915  | 49.1   |
| 22    | 3651.802  | 36.327  | 80.5   |
| 23    | 3467.165  | 34.490  | 68.4   |
| 24    | 3382.476  | 33.648  | 62.6   |
| 25    | 3194.787  | 31.781  | 98.5   |
| 26    | 2984.972  | 29.693  | 31.6   |
| 27    | 2801.098  | 27.864  | 37.8   |
| 28    | 2794.995  | 27.804  | 33.9   |
| 29    | 2521.854  | 25.087  | 85.9   |
| 30    | 2272.365  | 22.605  | 83.0   |
| 31    | 1849.684  | 18.400  | 43.2   |
| 32    | 1843.580  | 18.339  | 50.1   |
| 33    | 1412.506  | 14.051  | 71.1   |
| 34    | 1166.832  | 11.607  | 56.8   |
| 35    | 866.988   | 8.624   | 40.7   |
| 36    | -2.027    | -0.020  | 84.1   |

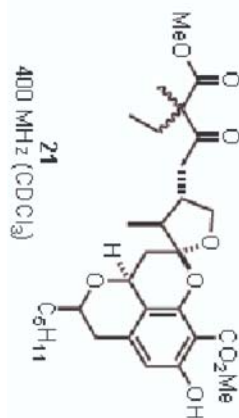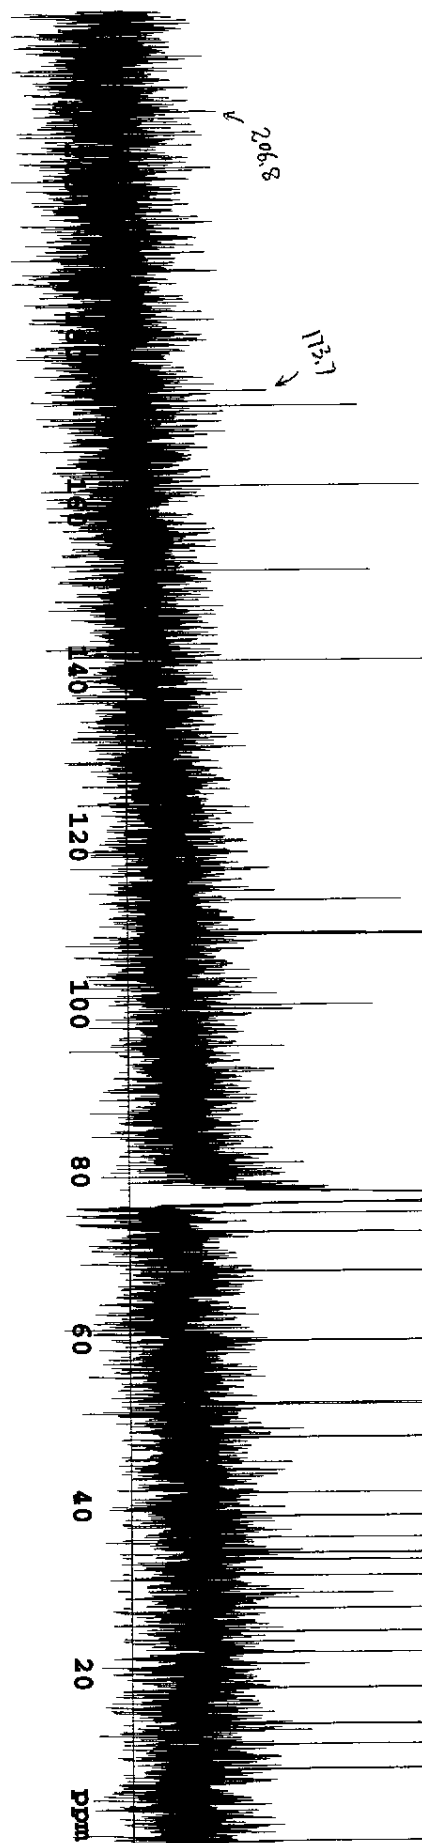



wack-10-143-10

Pulse Sequence: s2pul

Solvent: CDCl3

Ambient temperature

File: wack-10-143-10

INOVA-500 "gamble"

Pulse 46.1 degrees

Acq. time 1.638 sec

Width 5000.0 Hz

19 repetitions

OBSERVE H1, 399.7858276 MHz

DATA PROCESSING

FT size 16384

Total time 3 min, 31 sec

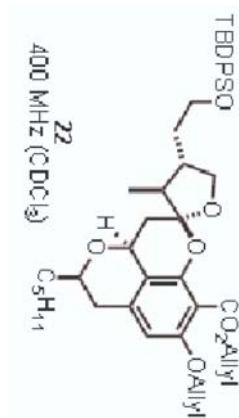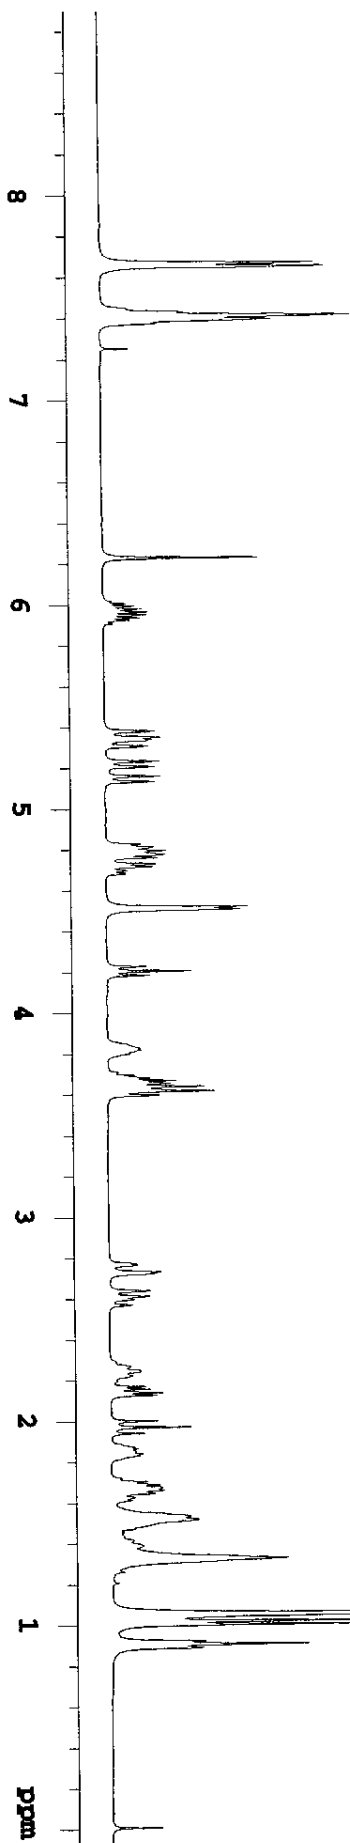

WXX-10-143-10C

| INDEX | FREQUENCY PPM | HEIGHT  |
|-------|---------------|---------|
| 1     | 16640.971     | 165.539 |
| 2     | 15656.180     | 155.543 |
| 3     | 14983.104     | 149.047 |
| 4     | 13656.352     | 135.849 |
| 5     | 13622.020     | 135.507 |
| 6     | 13425.181     | 133.549 |
| 7     | 13422.130     | 133.519 |
| 8     | 13364.909     | 132.949 |
| 9     | 13297.007     | 132.274 |
| 10    | 13033.793     | 129.656 |
| 11    | 12834.666     | 127.675 |
| 12    | 11871.837     | 118.097 |
| 13    | 11772.654     | 117.110 |
| 14    | 11522.410     | 114.621 |
| 15    | 11015.818     | 109.582 |
| 16    | 10925.029     | 108.678 |
| 17    | 10479.472     | 104.246 |
| 18    | 7772.563      | 77.319  |
| 19    | 7740.519      | 77.000  |
| 20    | 7708.476      | 76.681  |
| 21    | 7571.147      | 75.315  |
| 22    | 7372.020      | 73.334  |
| 23    | 6972.239      | 69.357  |
| 24    | 6850.169      | 68.143  |
| 25    | 6590.007      | 65.555  |
| 26    | 6355.021      | 63.218  |
| 27    | 4922.221      | 48.965  |
| 28    | 4153.941      | 41.322  |
| 29    | 3649.638      | 36.305  |
| 30    | 3583.262      | 35.645  |
| 31    | 3470.347      | 34.522  |
| 32    | 3460.429      | 34.423  |
| 33    | 3194.163      | 31.774  |
| 34    | 2694.438      | 26.803  |
| 35    | 2527.354      | 25.141  |
| 36    | 2272.532      | 22.606  |
| 37    | 1915.477      | 19.054  |
| 38    | 1411.174      | 14.038  |
| 39    | 1167.033      | 11.609  |

| INDEX | FREQUENCY PPM | HEIGHT |
|-------|---------------|--------|
| 18.2  |               |        |
| 21.1  |               |        |
| 16.6  |               |        |
| 26.6  |               |        |
| 172.8 |               |        |
| 15.4  |               |        |
| 16.9  |               |        |
| 26.7  |               |        |
| 20.2  |               |        |
| 86.7  |               |        |
| 170.0 |               |        |
| 82.8  |               |        |
| 33.9  |               |        |
| 22.1  |               |        |
| 14.5  |               |        |
| 29.8  |               |        |
| 29.0  |               |        |
| 71.7  |               |        |
| 75.4  |               |        |
| 74.7  |               |        |
| 34.2  |               |        |
| 29.1  |               |        |
| 41.4  |               |        |
| 31.5  |               |        |
| 40.3  |               |        |
| 34.3  |               |        |
| 38.5  |               |        |
| 39.3  |               |        |
| 36.3  |               |        |
| 30.9  |               |        |
| 29.5  |               |        |
| 31.4  |               |        |
| 46.1  |               |        |
| 136.9 |               |        |
| 44.3  |               |        |
| 48.1  |               |        |
| 29.4  |               |        |
| 40.3  |               |        |
| 38.6  |               |        |

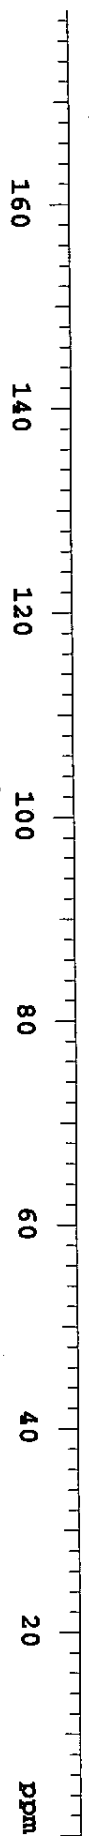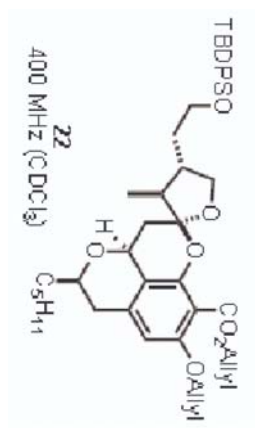

WDC-10-143-10

Pulse Sequence: gCOSY

Solvent: CDCl<sub>3</sub>

Ambient temperature

INNOVA-400 "FID"

Relax. delay 1.000 sec

Acq. time 0.205 sec

Width 5000.0 Hz

2D Width 5000.0 Hz

Single scan

128 increments

OBSERVE H1, 399.7858141 MHz

DATA PROCESSING

Sq. sine bell 0.102 sec

F1 DATA PROCESSING

Sq. sine bell 0.026 sec

FM size 2048 x 2048

Total time 2 min, 56 sec

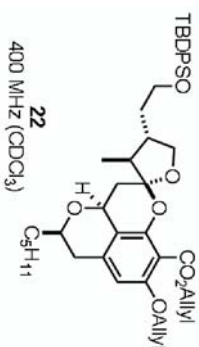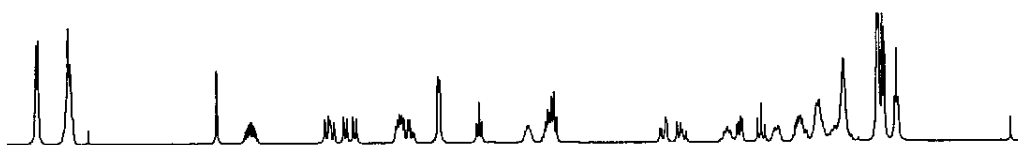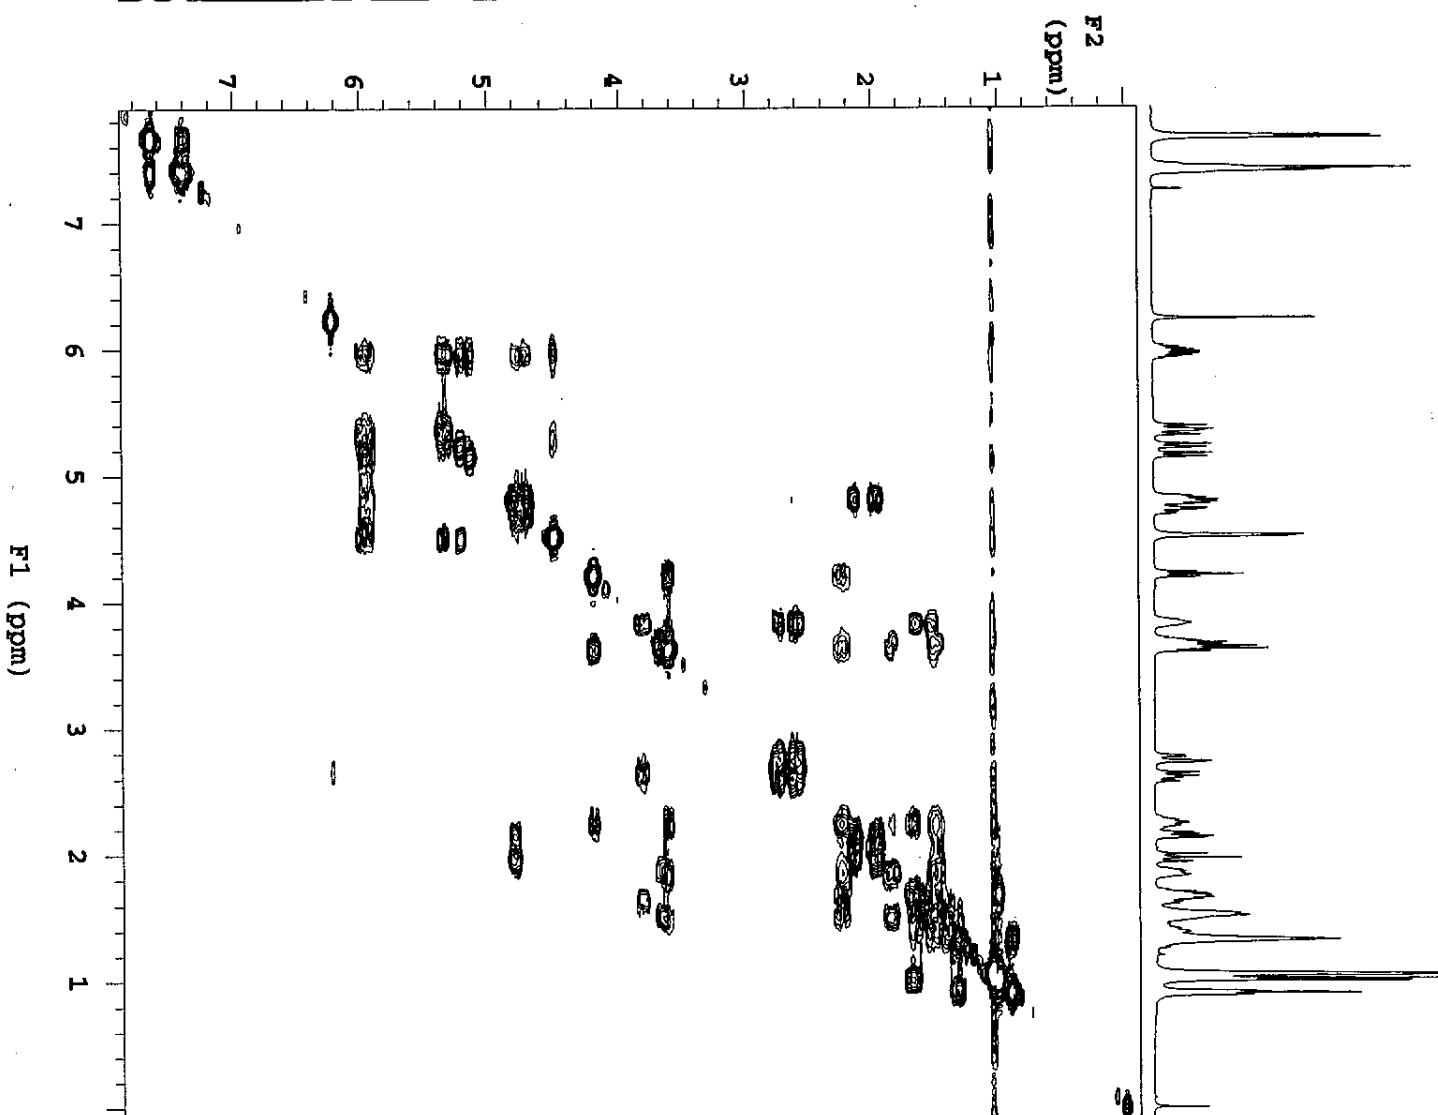



woc-10-147-2

Pulse Sequence: s2pul

Solvent: CDCl3

Ambient temperature

File: woc-10-147-2

INOVA-500 "gamma"

Pulse 46.1 degrees

Acq. time 1.638 sec

Width 5000.0 Hz

47 repetitions

OBSERVE H1, 399.7857971 MHz

DATA PROCESSING

FT size 16384

Total time 3 min, 31 sec

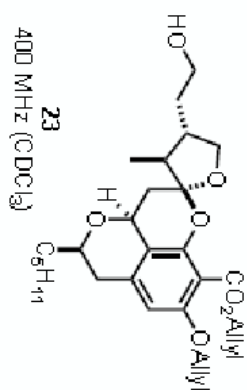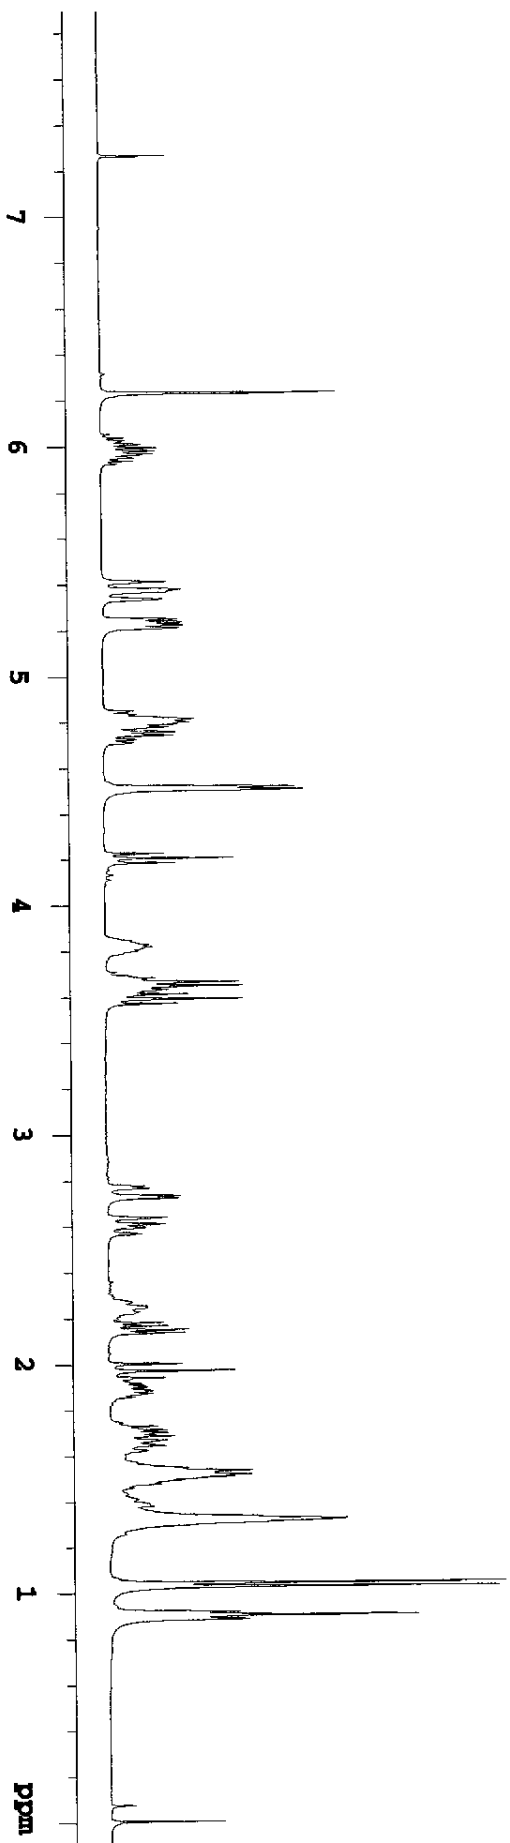

WX-10-147-2 C

| INDEX | FREQUENCY | PPM     | HEIGHT |
|-------|-----------|---------|--------|
| 1     | 16650.889 | 165.637 | 18.0   |
| 2     | 15636.180 | 155.543 | 29.7   |
| 3     | 14980.052 | 149.016 | 22.2   |
| 4     | 13662.455 | 135.909 | 29.4   |
| 5     | 13361.857 | 132.919 | 37.3   |
| 6     | 13302.348 | 132.327 | 26.4   |
| 7     | 11876.414 | 118.142 | 44.3   |
| 8     | 11775.706 | 117.141 | 47.6   |
| 9     | 11517.833 | 114.575 | 25.4   |
| 10    | 11007.426 | 109.498 | 16.0   |
| 11    | 10939.524 | 108.823 | 42.9   |
| 12    | 10481.761 | 104.269 | 45.2   |
| 13    | 7772.563  | 77.319  | 119.4  |
| 14    | 7740.519  | 77.000  | 126.8  |
| 15    | 7708.476  | 76.681  | 129.1  |
| 16    | 7571.910  | 75.323  | 49.8   |
| 17    | 7330.058  | 72.917  | 44.2   |
| 18    | 6972.239  | 69.357  | 62.0   |
| 19    | 6844.065  | 68.082  | 48.2   |
| 20    | 6596.873  | 65.623  | 52.3   |
| 21    | 6214.640  | 61.821  | 55.6   |
| 22    | 4919.169  | 48.934  | 51.3   |
| 23    | 4082.988  | 40.616  | 54.5   |
| 24    | 3648.875  | 36.298  | 51.3   |
| 25    | 3585.551  | 35.668  | 50.5   |
| 26    | 3461.192  | 34.431  | 48.5   |
| 27    | 3458.140  | 34.400  | 56.3   |
| 28    | 3194.163  | 31.774  | 59.1   |
| 29    | 2526.591  | 25.134  | 56.2   |
| 30    | 2271.769  | 22.599  | 62.9   |
| 31    | 1410.411  | 14.030  | 58.6   |
| 32    | 1171.611  | 11.655  | 51.3   |

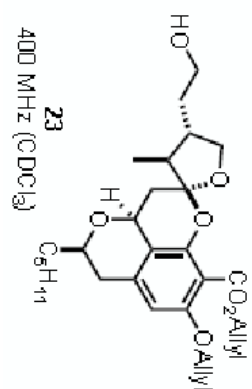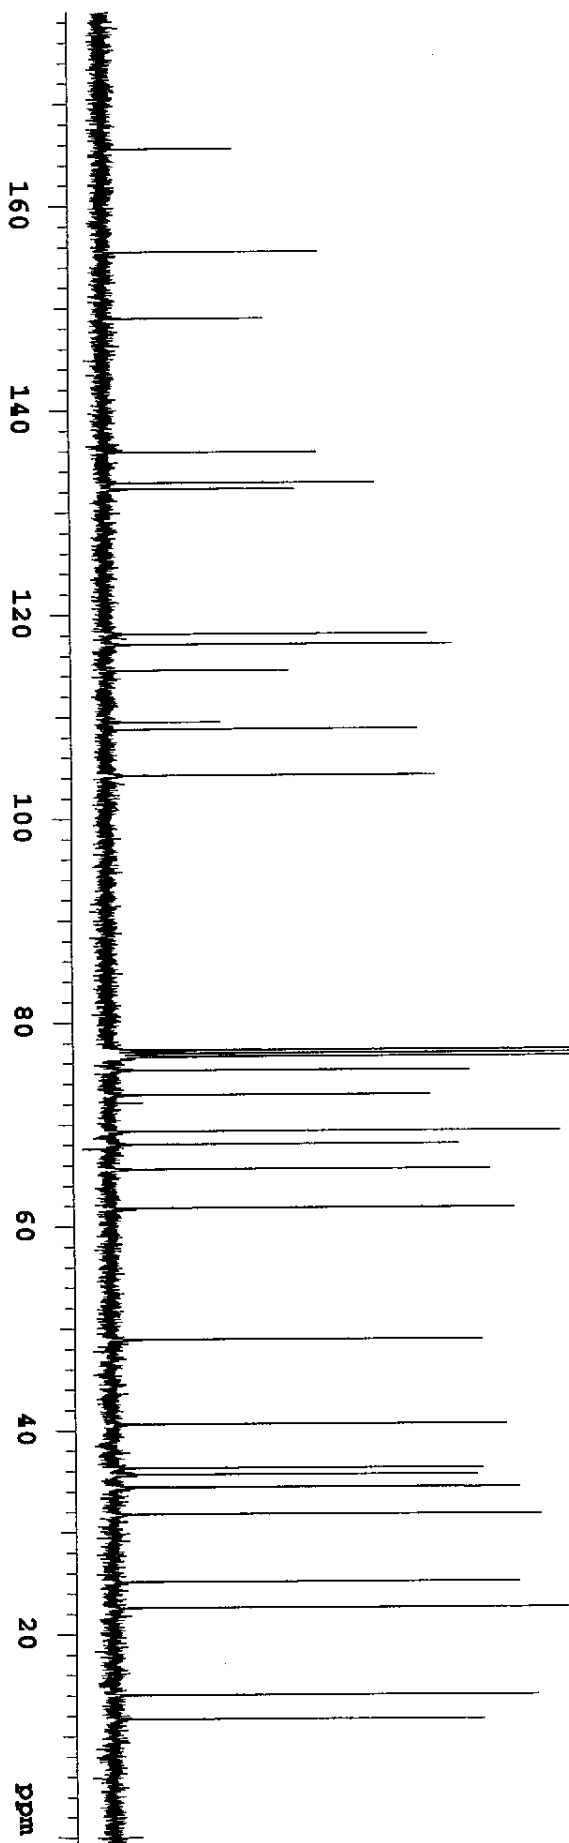

WARR-10-147-2

Pulse Sequence: gcosy

Solvent: CDCl3

Ambient temperature

INOVA-400 "f1d"

Relax. delay 1.000 sec

Acq. time 0.205 sec

Width 5000.0 Hz

2D Width 5000.0 Hz

Single scan

128 increments

OBSERVE H1, 399.7858080 MHz

DATA PROCESSING

Sq. sine bell 0.102 sec

F1 DATA PROCESSING

Sq. sine bell 0.026 sec

FT size 2048 x 2048

Total time 2 min, 56 sec

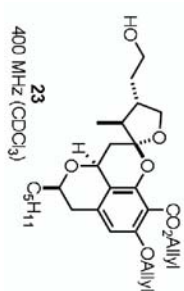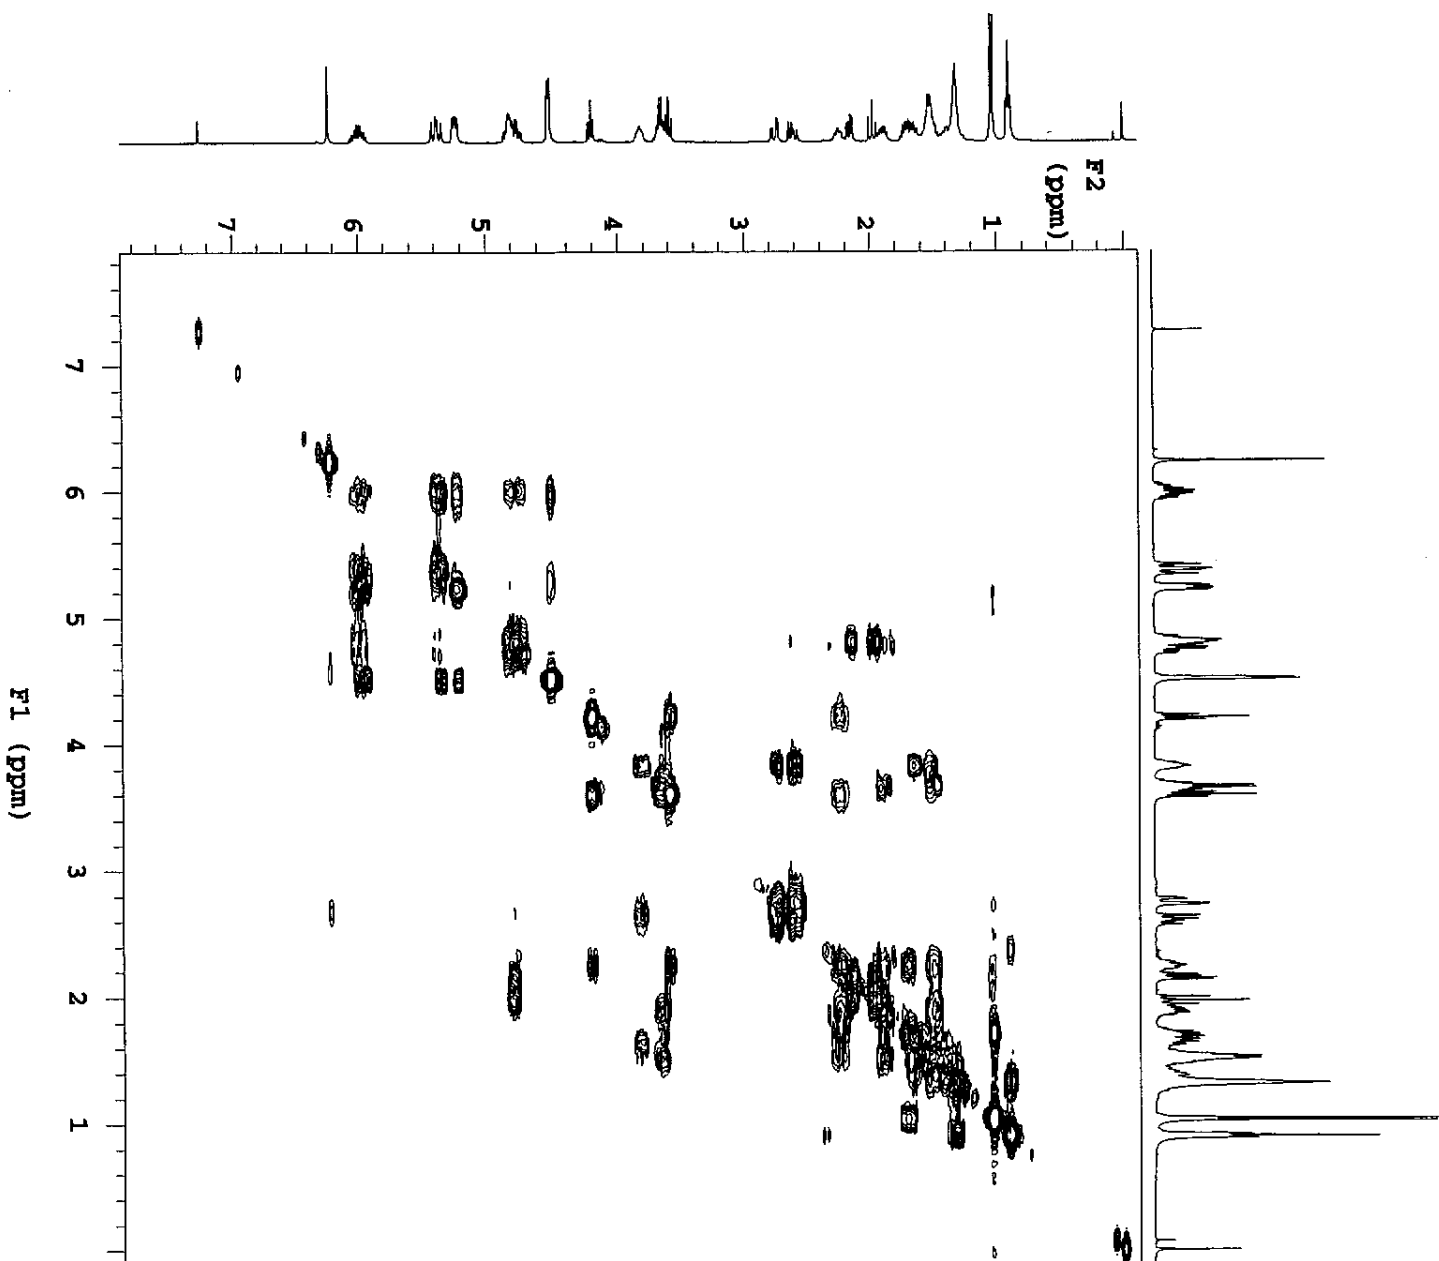

wxc-11-1-4

Pulse Sequence: zgpg30

Solvent: CDCl3

Ambient temperature

File: wxc-11-1-4

INOVA-500 "gambler"

Pulse 46.1 degrees

Acq. time 1.638 sec

Width 5000.0 Hz

21 repetitions

OBSERVE H1, 399.7857971 MHz

DATA PROCESSING

FT size 16384

Total time 3 min, 31 sec

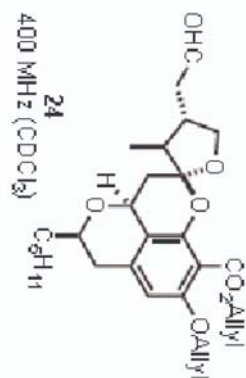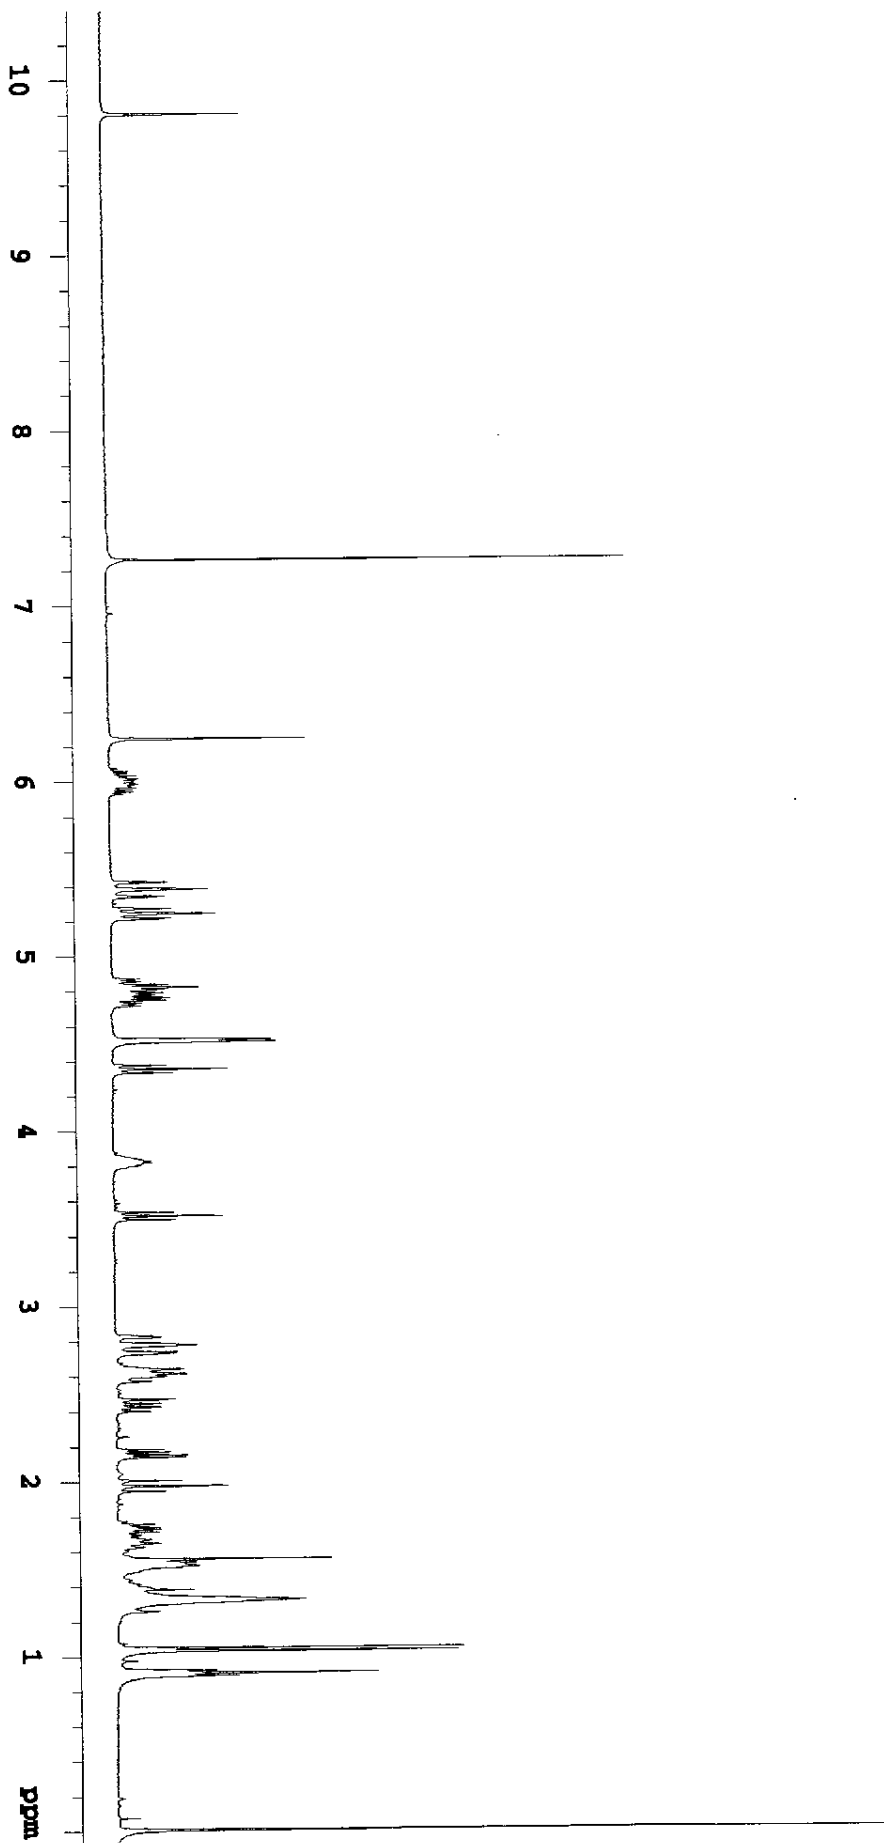

NX-11-1-3C

| INDEX | FREQUENCY | PPM     | HEIGHT |
|-------|-----------|---------|--------|
| 1     | 20159.648 | 200.541 | 48.1   |
| 2     | 16635.630 | 155.485 | 14.4   |
| 3     | 15640.757 | 155.589 | 25.0   |
| 4     | 14963.267 | 148.849 | 22.0   |
| 5     | 13663.981 | 135.925 | 31.7   |
| 6     | 13359.568 | 132.896 | 44.7   |
| 7     | 13294.719 | 132.251 | 29.5   |
| 8     | 11900.065 | 118.378 | 46.0   |
| 9     | 11778.758 | 117.171 | 54.8   |
| 10    | 11509.440 | 114.492 | 29.0   |
| 11    | 11015.818 | 109.582 | 15.8   |
| 12    | 10901.377 | 108.443 | 52.8   |
| 13    | 10500.071 | 104.451 | 57.0   |
| 14    | 7772.563  | 77.319  | 179.2  |
| 15    | 7740.519  | 77.000  | 188.7  |
| 16    | 7708.476  | 76.681  | 192.2  |
| 17    | 7574.198  | 75.345  | 50.9   |
| 18    | 7257.579  | 72.196  | 54.0   |
| 19    | 6974.528  | 69.380  | 66.7   |
| 20    | 6834.147  | 67.984  | 56.1   |
| 21    | 6602.214  | 65.677  | 60.4   |
| 22    | 4877.970  | 48.524  | 62.0   |
| 23    | 4752.085  | 47.272  | 65.3   |
| 24    | 3781.626  | 37.618  | 62.3   |
| 25    | 3648.875  | 36.298  | 61.2   |
| 26    | 3455.851  | 34.378  | 55.6   |
| 27    | 3448.985  | 34.309  | 53.3   |
| 28    | 3194.163  | 31.774  | 71.9   |
| 29    | 2525.828  | 25.126  | 70.8   |
| 30    | 2272.532  | 22.606  | 67.3   |
| 31    | 1411.174  | 14.038  | 64.3   |
| 32    | 1159.404  | 11.533  | 58.8   |

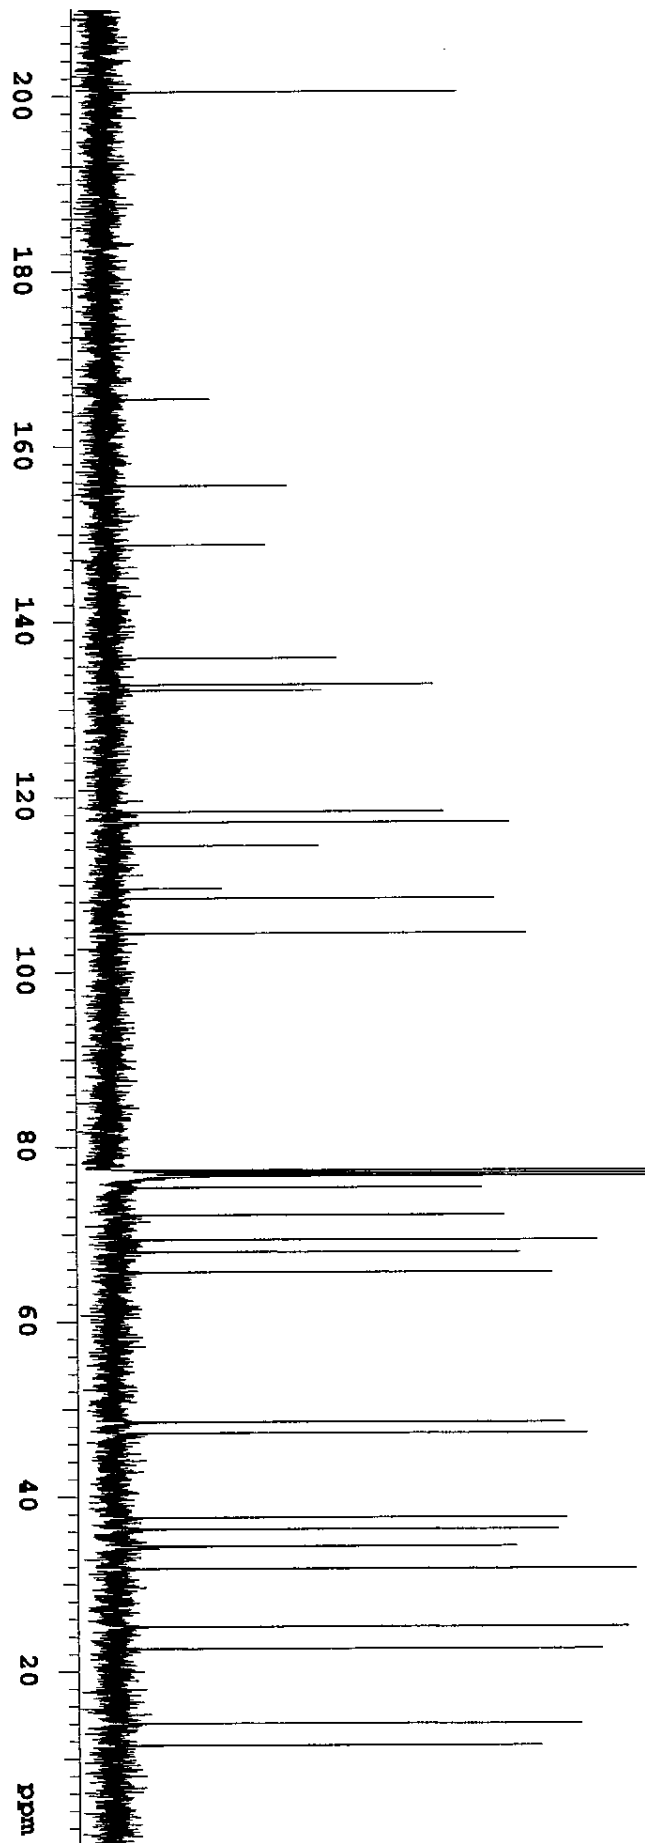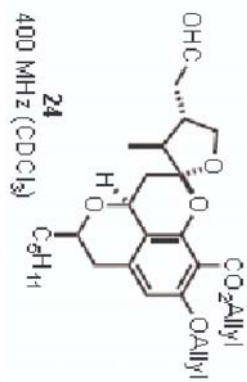

WXR-11-1-4

Pulse sequence: gcosy

Solvent: CDCl3

Ambient temperature

INOVA-400 "fid"

Relax. delay 1.000 sec

Acq. time 0.205 sec

Width 5000.0 Hz

2D width 5000.0 Hz

Single scan

128 increments

OBSERVE H1, 399.7858092 MHz

DATA PROCESSING

Sq. sine bell 0.102 sec

F1 DATA PROCESSING

Sq. sine bell 0.026 sec

FT size 2048 x 2048

Total time 2 min, 56 sec

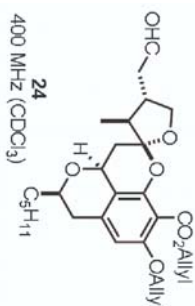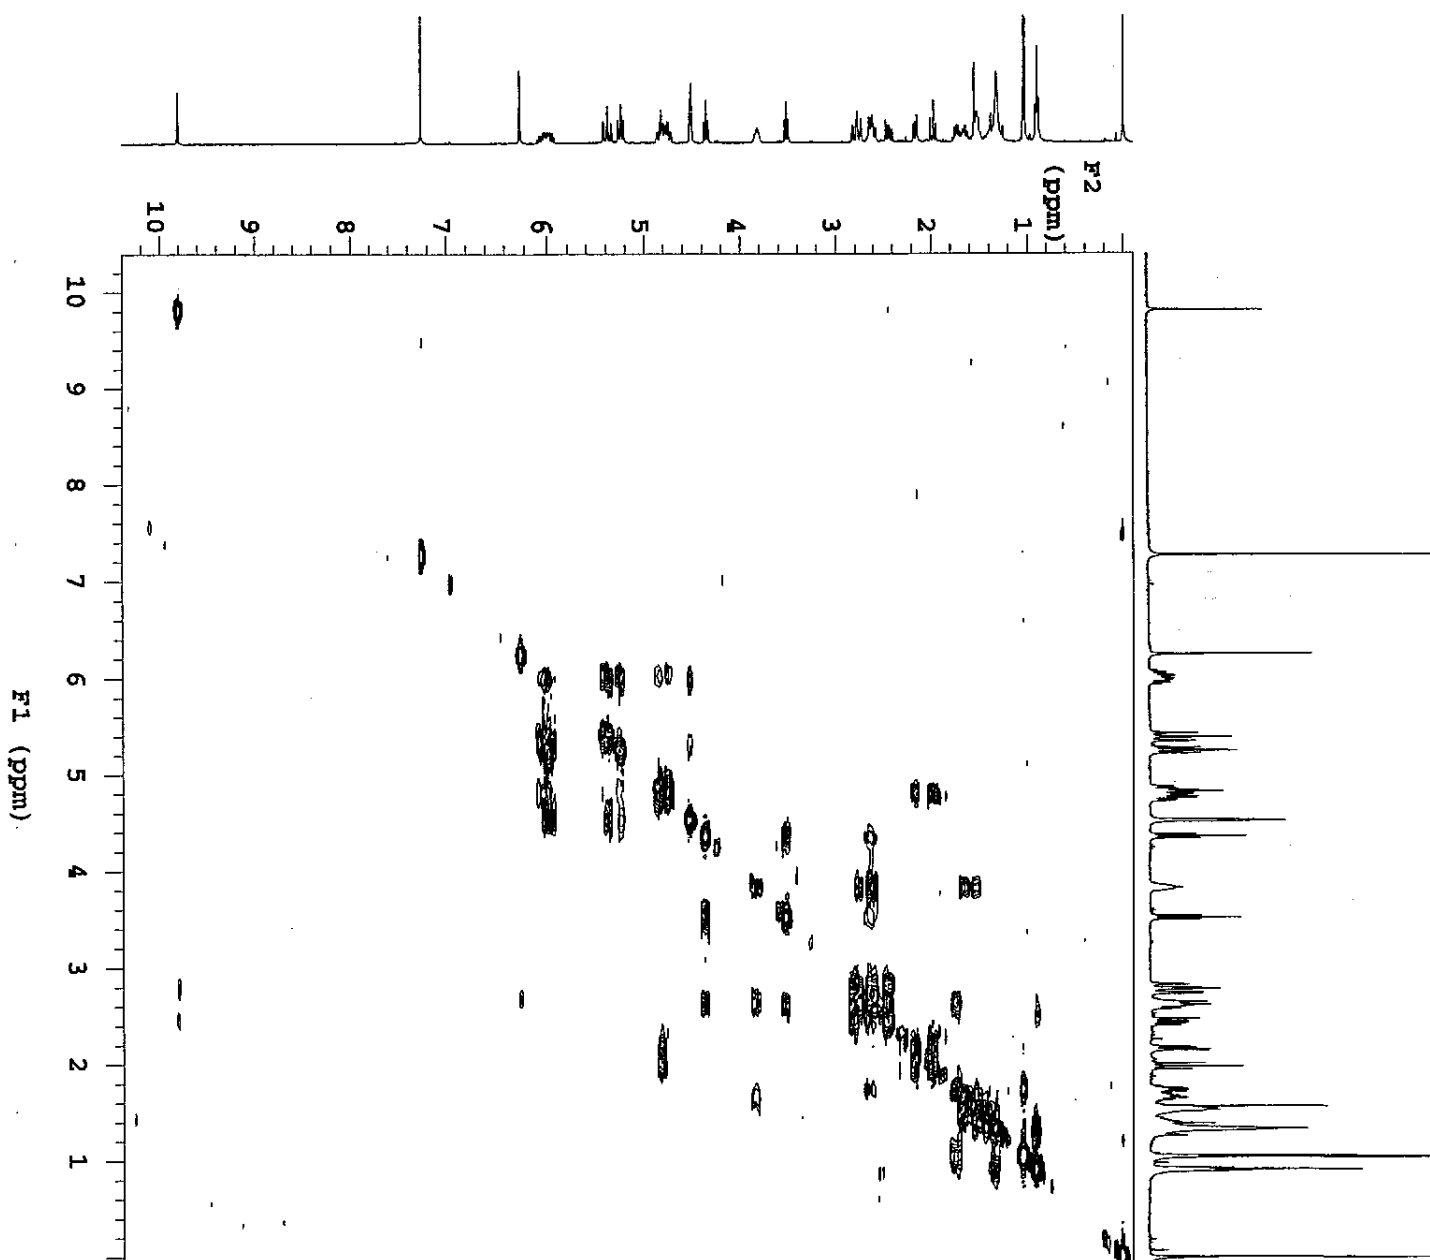

wxc-11-3-2

Pulse Sequence: zgpg30

Solvent: CDCl3

Ambient temperature

File: wxc-11-3-2

INOVA-400 "cosy"

Pulse 46.1 degrees

Acq. time 1.638 sec

Width 5000.0 Hz

38 repetitions

OBSERVE H1, 399.7858087 MHz

DATA PROCESSING

FT size 16384

Total time 3 min, 30 sec

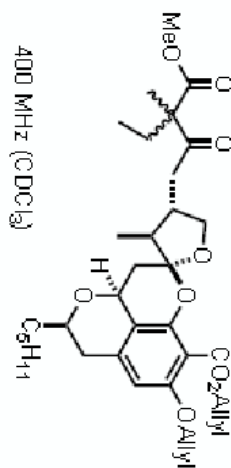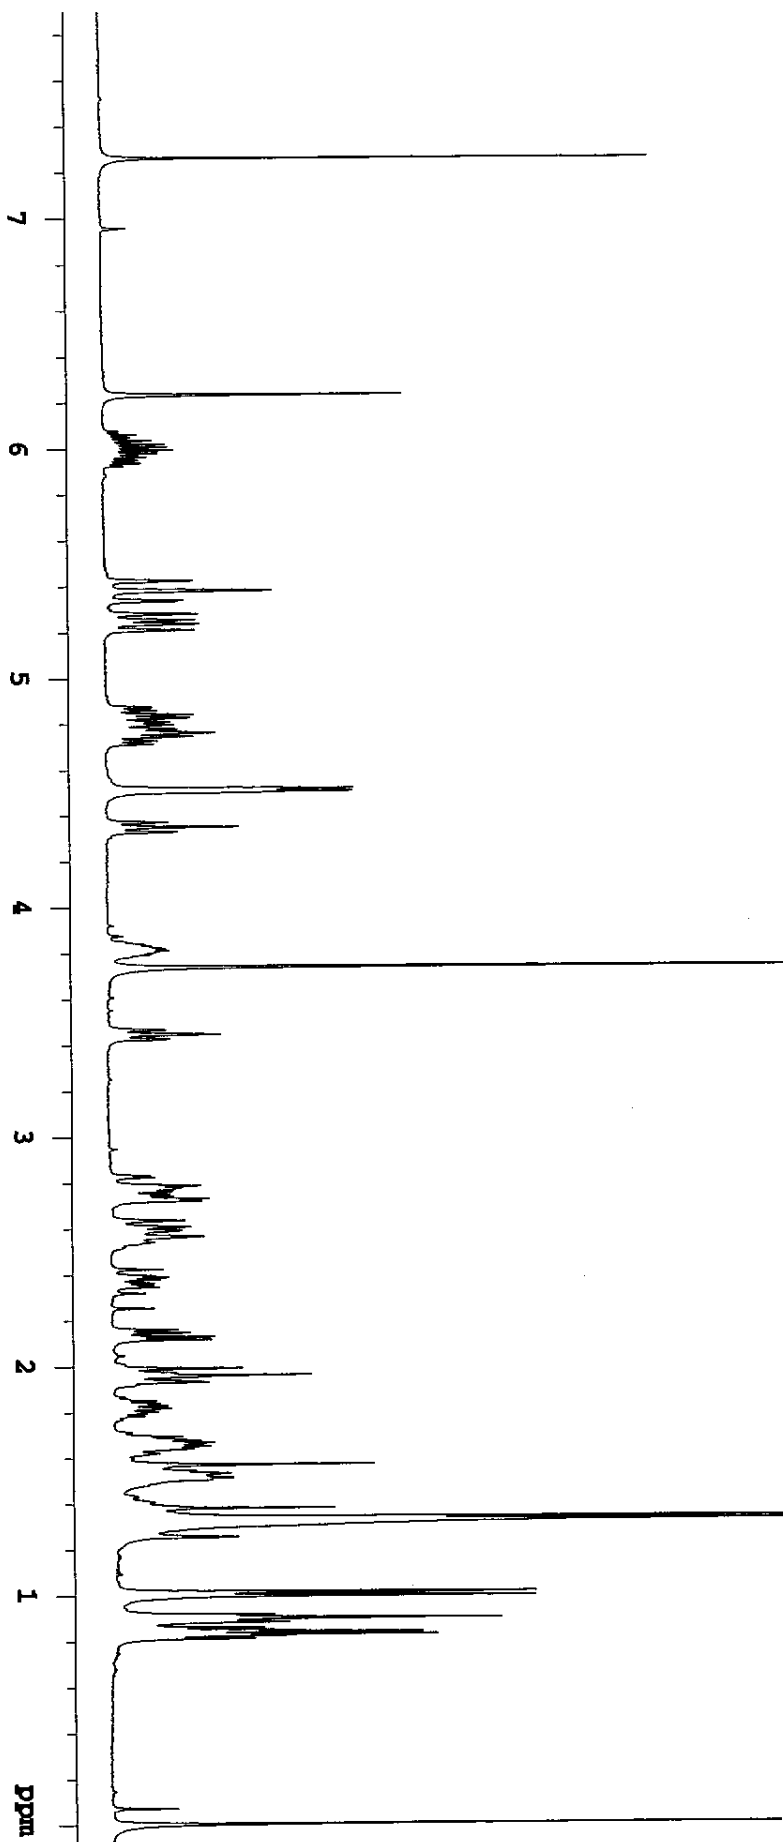

WX-11-3-2C

| INDEX | FREQUENCY PPM | HEIGHT  | INDEX | FREQUENCY PPM | HEIGHT  |
|-------|---------------|---------|-------|---------------|---------|
| 1     | 20765.819     | 206.571 | 13    | 11032.785     | 109.651 |
| 2     | 20759.715     | 206.510 | 14    | 10899.948     | 108.429 |
| 3     | 17437.776     | 173.465 | 15    | 10494.815     | 104.399 |
| 4     | 16639.717     | 165.526 | 16    | 7772.564      | 77.319  |
| 5     | 15638.709     | 155.568 | 17    | 7740.519      | 77.000  |
| 6     | 14971.880     | 148.935 | 18    | 7708.475      | 76.681  |
| 7     | 13656.532     | 135.850 | 19    | 7574.193      | 75.345  |
| 8     | 13364.317     | 132.944 | 20    | 7315.549      | 72.773  |
| 9     | 13291.073     | 132.215 | 21    | 6976.030      | 69.395  |
| 10    | 11913.162     | 118.508 | 22    | 6839.460      | 68.037  |
| 11    | 11778.118     | 117.165 | 23    | 6604.468      | 65.699  |
| 12    | 11512.607     | 114.523 | 24    | 6005.542      | 59.741  |
| 25    | 5267.757      | 52.402  | 26    | 4871.779      | 48.463  |
| 27    | 4868.727      | 48.432  | 28    | 4225.550      | 42.034  |
| 29    | 3907.394      | 38.869  | 30    | 3650.276      | 36.312  |
| 31    | 3458.009      | 34.399  | 32    | 3195.550      | 31.788  |
| 33    | 2801.098      | 27.864  | 34    | 2794.232      | 27.796  |
| 35    | 2527.195      | 25.140  | 36    | 2273.891      | 22.620  |
| 37    | 1849.684      | 18.400  | 38    | 1841.291      | 18.317  |
| 39    | 1411.743      | 14.044  |       |               |         |

| FREQUENCY PPM | HEIGHT |
|---------------|--------|
| 1168.358      | 11.622 |
| 868.514       | 8.640  |
| 863.936       | 8.594  |
| -2.027        | -0.020 |

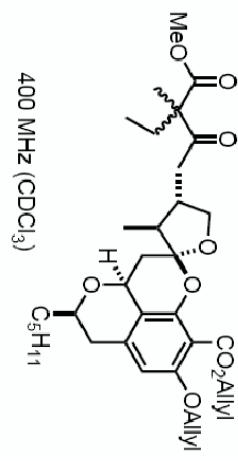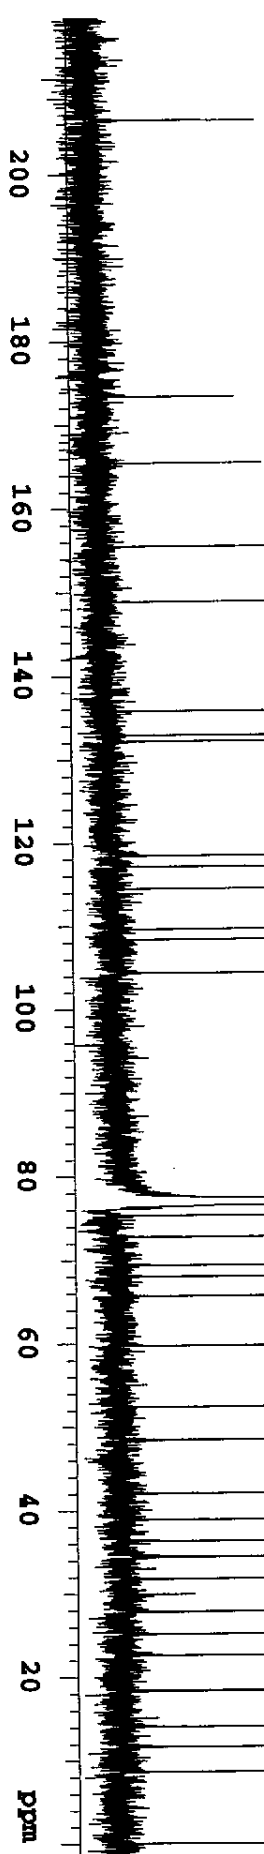



wxc-11-15-2\_2nd

Pulse Sequence: s2pul

Solvent: CDCl3

Ambient temperature

File: wxc-11-15-2\_2nd

INOVA-400 "cosy"

Pulse 46.1 degrees

Acq. time 1.638 sec

Width 8000.0 Hz

60 repetitions

OBSERVE H1, 399.7858085 MHz

DATA PROCESSING

FT size 32768

Total time 3 min, 30 sec

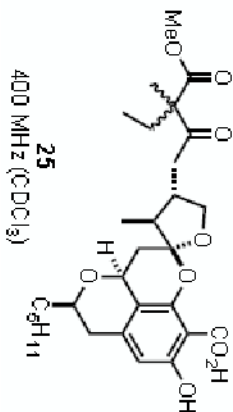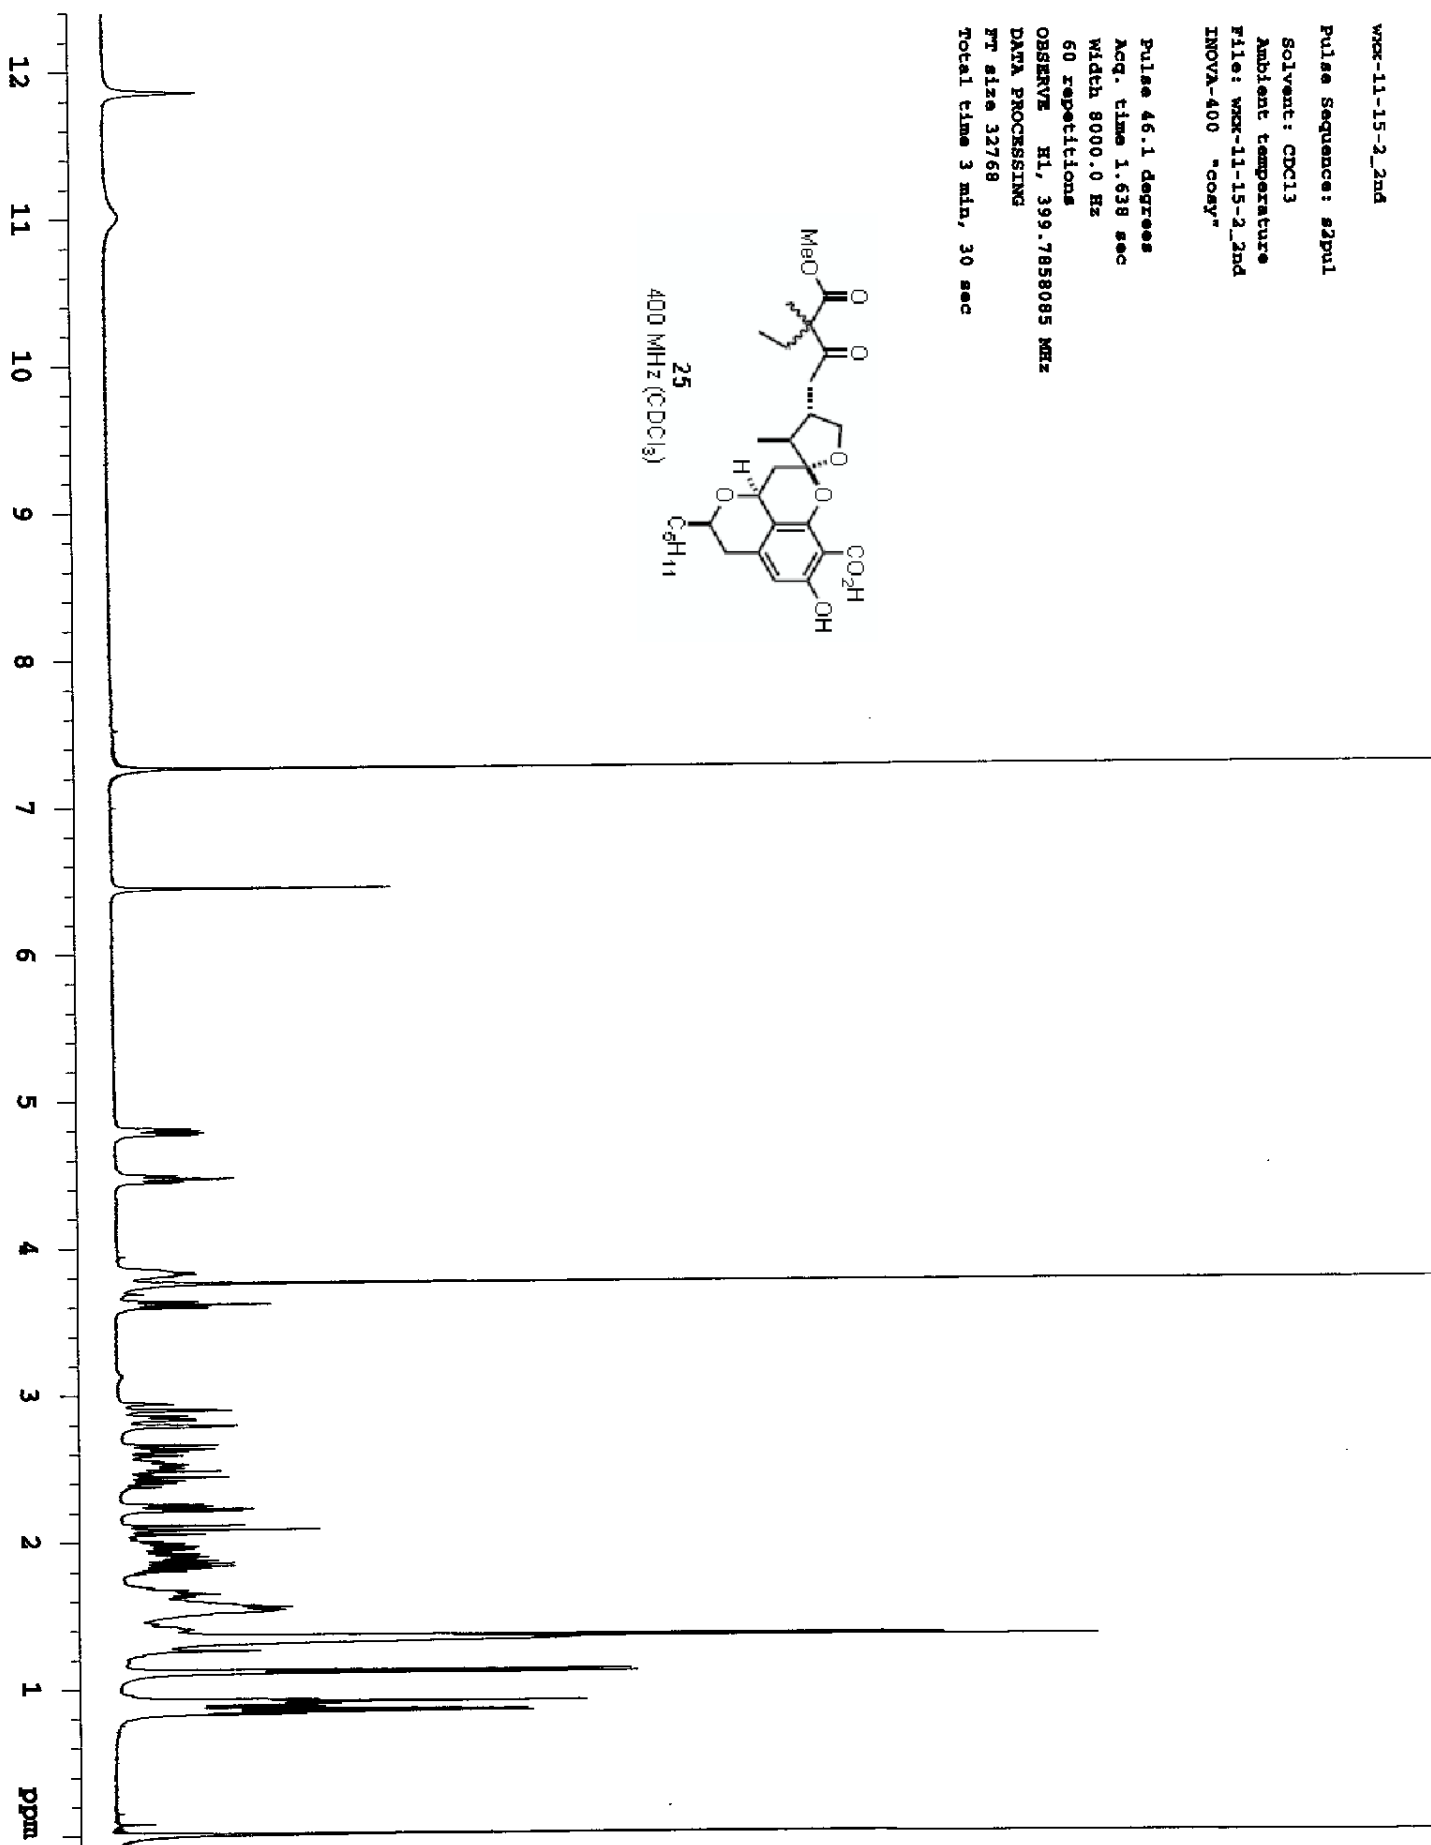

WX-11-15-2c in CDCl<sub>3</sub>

| INDEX | FREQUENCY PPM | HEIGHT  | INDEX | FREQUENCY PPM | HEIGHT  |
|-------|---------------|---------|-------|---------------|---------|
| 1     | 21358.988     | 212.472 | 1     | 21358.988     | 212.472 |
| 2     | 20712.016     | 206.036 | 2     | 20712.016     | 206.036 |
| 3     | 20705.912     | 205.975 | 3     | 20705.912     | 205.975 |
| 4     | 19229.624     | 191.290 | 4     | 19229.624     | 191.290 |
| 5     | 18792.460     | 186.941 | 5     | 18792.460     | 186.941 |
| 6     | 17427.561     | 173.363 | 6     | 17427.561     | 173.363 |
| 7     | 17139.170     | 170.495 | 7     | 17139.170     | 170.495 |
| 8     | 16338.847     | 162.533 | 8     | 16338.847     | 162.533 |
| 9     | 15056.346     | 149.775 | 9     | 15056.346     | 149.775 |
| 10    | 14294.932     | 142.201 | 10    | 14294.932     | 142.201 |
| 11    | 11274.455     | 112.154 | 11    | 11274.455     | 112.154 |
| 12    | 11107.371     | 110.492 | 12    | 11107.371     | 110.492 |
| 13    | 9916.422      | 98.645  | 13    | 9916.422      | 98.645  |
| 14    | 7771.800      | 77.311  | 14    | 7771.800      | 77.311  |
| 15    | 7740.519      | 77.000  | 15    | 7740.519      | 77.000  |
| 16    | 7708.476      | 76.681  | 16    | 7708.476      | 76.681  |
| 17    | 7560.465      | 75.209  | 17    | 7560.465      | 75.209  |
| 18    | 7389.567      | 73.509  | 18    | 7389.567      | 73.509  |
| 19    | 6760.142      | 67.248  | 19    | 6760.142      | 67.248  |
| 20    | 6004.069      | 59.726  | 20    | 6004.069      | 59.726  |
| 21    | 6005.595      | 59.742  | 21    | 6005.595      | 59.742  |
| 22    | 5276.988      | 52.494  | 22    | 5276.988      | 52.494  |
| 23    | 4845.927      | 48.206  | 23    | 4845.927      | 48.206  |
| 24    | 4176.829      | 41.550  | 24    | 4176.829      | 41.550  |
| 25    | 3954.814      | 39.341  | 25    | 3954.814      | 39.341  |
| 26    | 3543.534      | 36.245  | 26    | 3543.534      | 36.245  |
| 27    | 3448.222      | 34.302  | 27    | 3448.222      | 34.302  |
| 28    | 3191.874      | 31.752  | 28    | 3191.874      | 31.752  |
| 29    | 2806.590      | 27.919  | 29    | 2806.590      | 27.919  |
| 30    | 2799.723      | 27.851  | 30    | 2799.723      | 27.851  |
| 31    | 2515.910      | 25.027  | 31    | 2515.910      | 25.027  |
| 32    | 2271.006      | 22.591  | 32    | 2271.006      | 22.591  |
| 33    | 1850.627      | 18.409  | 33    | 1850.627      | 18.409  |
| 34    | 1843.760      | 18.341  | 34    | 1843.760      | 18.341  |
| 35    | 1411.173      | 14.038  | 35    | 1411.173      | 14.038  |
| 36    | 1205.943      | 11.596  | 36    | 1205.943      | 11.596  |
| 37    | 871.775       | 8.672   | 37    | 871.775       | 8.672   |
| 38    | 865.672       | 8.611   | 38    | 865.672       | 8.611   |
| 39    | -1.790        | -0.018  | 39    | -1.790        | -0.018  |

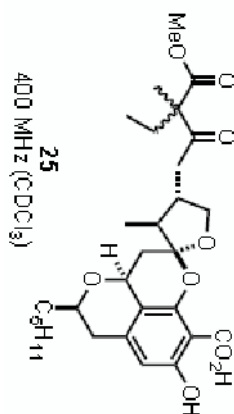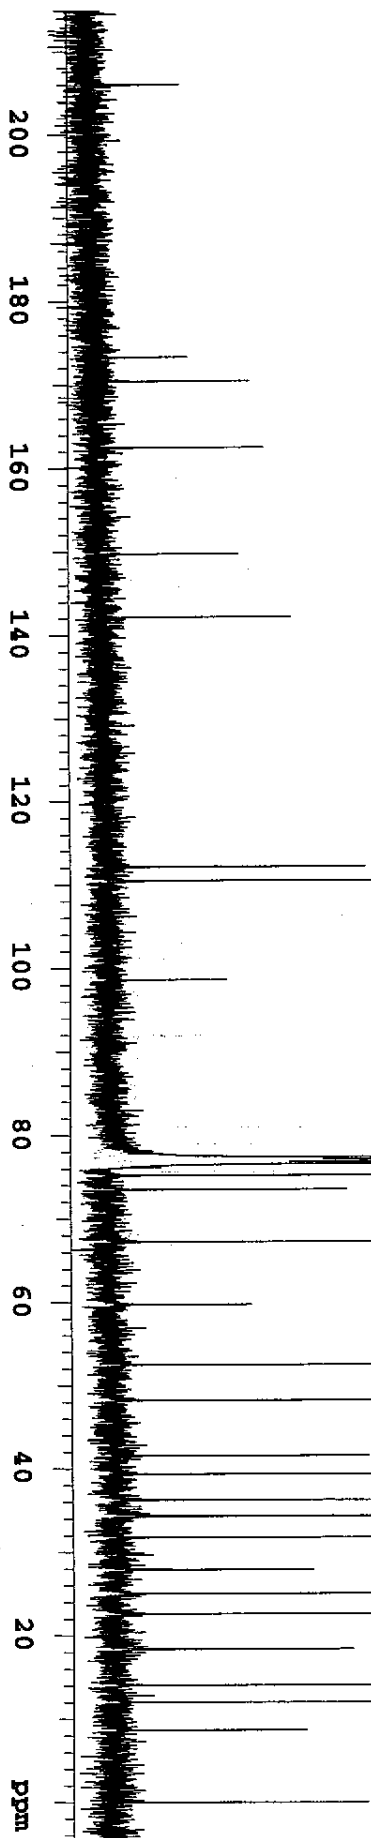

WXC-11-15-2

Pulse sequence: gcosy

Solvent: CDCl<sub>3</sub>

Ambient temperature

INOVA-400 "fid"

Relax. delay 1.000 sec

Acq. time 0.128 sec

Width 8000.0 Hz

2D Width 8000.0 Hz

Single scan

128 increments

OBSERVE H1, 399.7858088 MHz

DATA PROCESSING

Sg. sine bell 0.064 sec

F1 DATA PROCESSING

Sq. sine bell 0.016 sec

F1 size 2048 x 2048

Total time 2 min, 45 sec

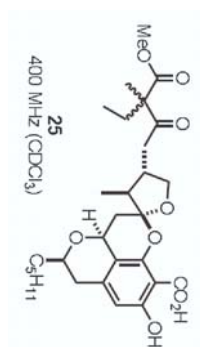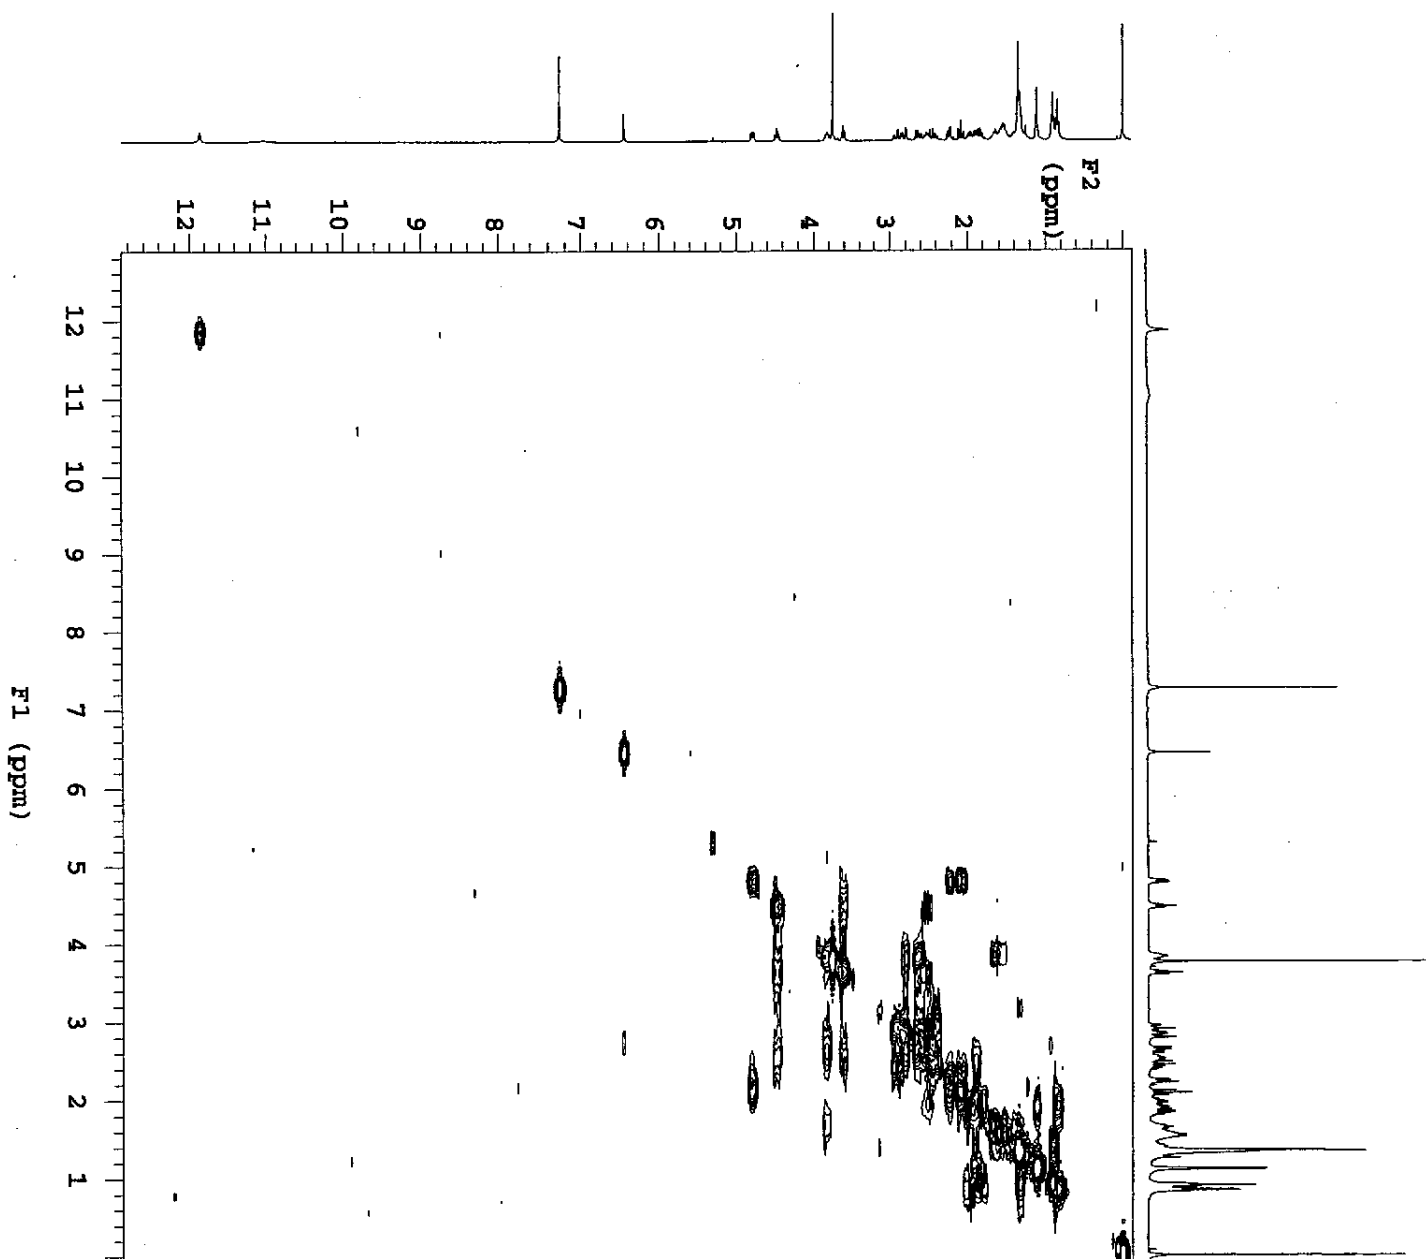

wxk-11-15-2-CD3OD 500 MHz

Pulse Sequence: s2pu1

Solvent: CDCl3

Temp: 25.0 C / 298.1 K

File: wxk-11-15-2-CD3OD

INOVA-500 "echo"

Pulse 47.4 degrees

Acq. time 1.892 sec

Width 8000.0 Hz

73 repetitions

OBSERVE H1, 499.8040917 MHz

DATA PROCESSING

FT size 32768

Total time 4 min, 3 sec

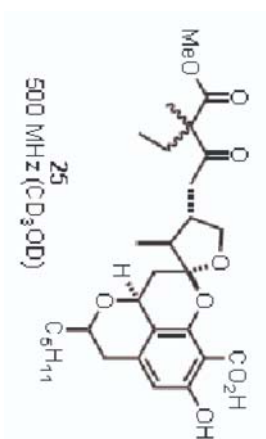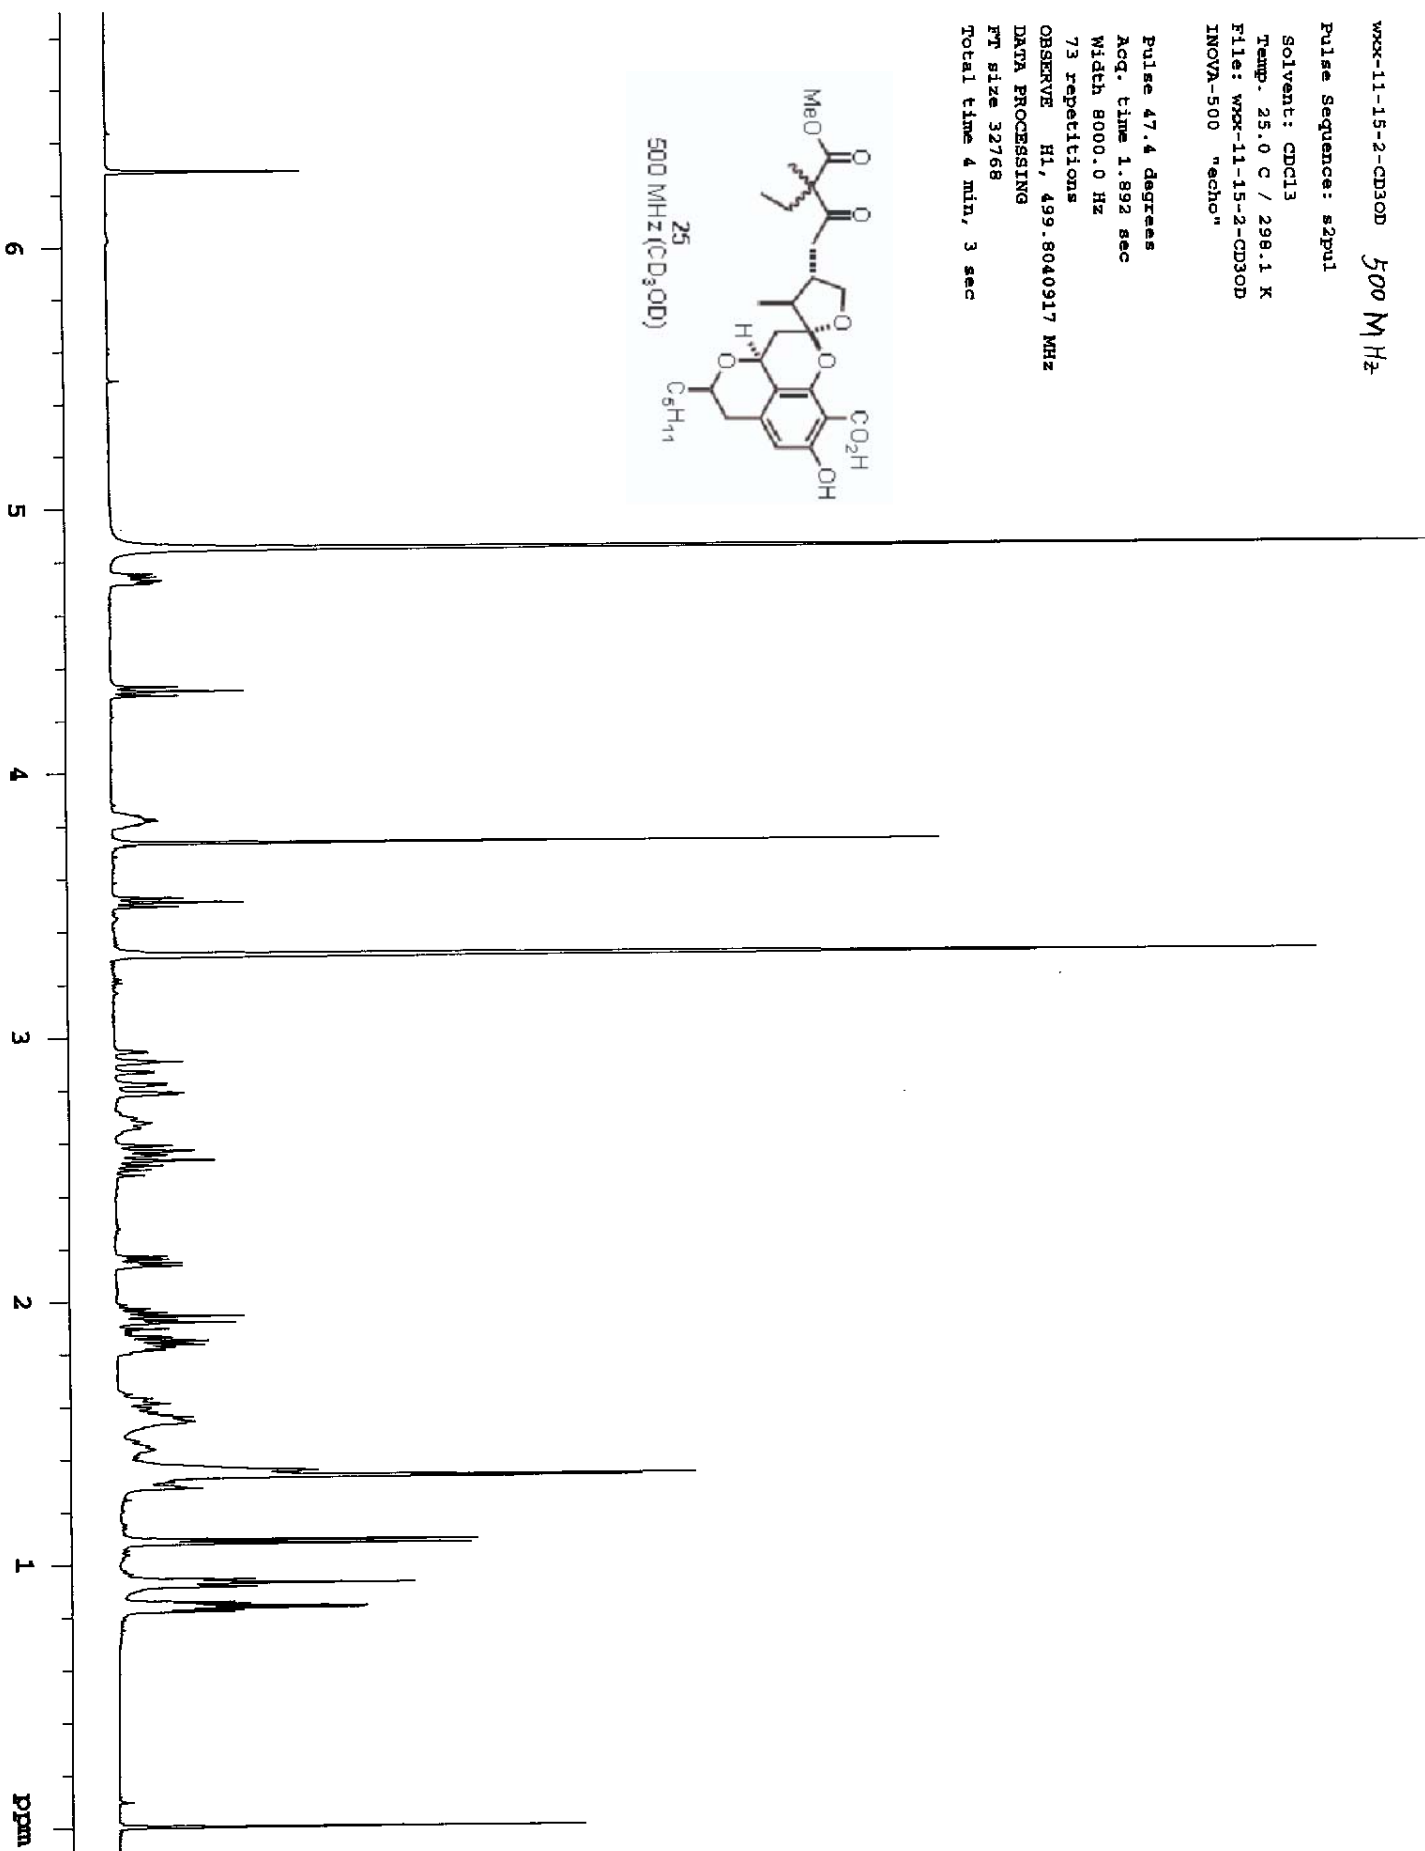

| INDEX | FREQUENCY | PPM     | HEIGHT | INDEX | FREQUENCY | PPM     | HEIGHT |
|-------|-----------|---------|--------|-------|-----------|---------|--------|
| 1     | 20986.153 | 208.763 | 15.540 | 10    | 11130.210 | 110.719 | 35.7   |
| 2     | 20914.444 | 208.049 | -13.9  | 11    | 10992.114 | 109.345 | 44.6   |
| 3     | 19743.297 | 196.399 | -13.7  | 12    | 7695.879  | 76.566  | 52.0   |
| 4     | 17576.482 | 174.844 | 19.1   | 13    | 7452.730  | 74.137  | 26.9   |
| 5     | 17457.460 | 173.660 | 14.3   | 14    | 6987.323  | 69.507  | 46.3   |
| 6     | 16424.409 | 163.384 | 25.8   | 15    | 6135.856  | 61.037  | 47.9   |
| 7     | 15389.068 | 153.085 | 18.3   | 16    | 5313.382  | 52.856  | 51.6   |
| 8     | 14302.609 | 142.277 | 33.1   | 17    | 4989.886  | 49.638  | 816.3  |
| 9     | 11436.158 | 113.763 | 36.6   | 18    | 4968.523  | 49.425  | 2240.4 |
|       |           |         |        | 19    | 4947.160  | 49.213  | 4061.6 |
|       |           |         |        | 20    | 4925.797  | 49.000  | 5707.6 |
|       |           |         |        | 21    | 4904.434  | 48.787  | 5404.9 |
|       |           |         |        | 22    | 4883.071  | 48.575  | 2378.3 |
|       |           |         |        | 23    | 4861.708  | 48.362  | 770.9  |
|       |           |         |        | 24    | 4283.383  | 42.609  | 37.4   |
|       |           |         |        | 25    | 4067.464  | 40.462  | 41.2   |
|       |           |         |        | 26    | 3762.279  | 37.426  | 53.4   |
|       |           |         |        | 27    | 3562.383  | 35.437  | 45.9   |
|       |           |         |        | 28    | 3521.946  | 35.035  | 43.7   |
|       |           |         |        | 29    | 3320.524  | 33.031  | 72.5   |
|       |           |         |        | 30    | 2898.605  | 28.834  | 30.2   |
|       |           |         |        | 31    | 2630.805  | 26.170  | 62.1   |
|       |           |         |        | 32    | 2382.842  | 23.704  | 72.2   |
|       |           |         |        | 33    | 1899.124  | 18.892  | 31.1   |
|       |           |         |        | 34    | 1887.680  | 18.778  | 30.3   |
|       |           |         |        | 35    | 1447.450  | 14.399  | 51.7   |
|       |           |         |        | 36    | 1195.672  | 11.894  | 50.1   |
|       |           |         |        | 37    | 903.458   | 8.987   | 23.9   |
|       |           |         |        | 38    | -3.705    | -0.037  | 17.8   |
|       |           |         |        | 39    | -2162.127 | -21.508 | 15.6   |

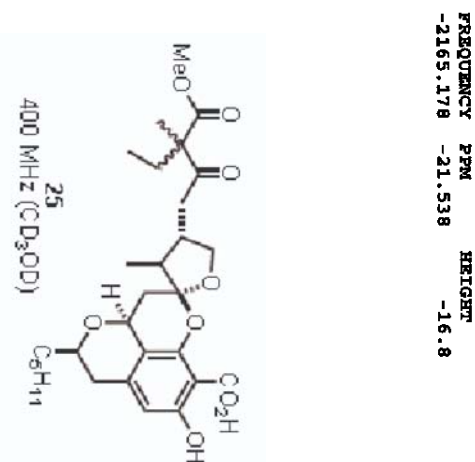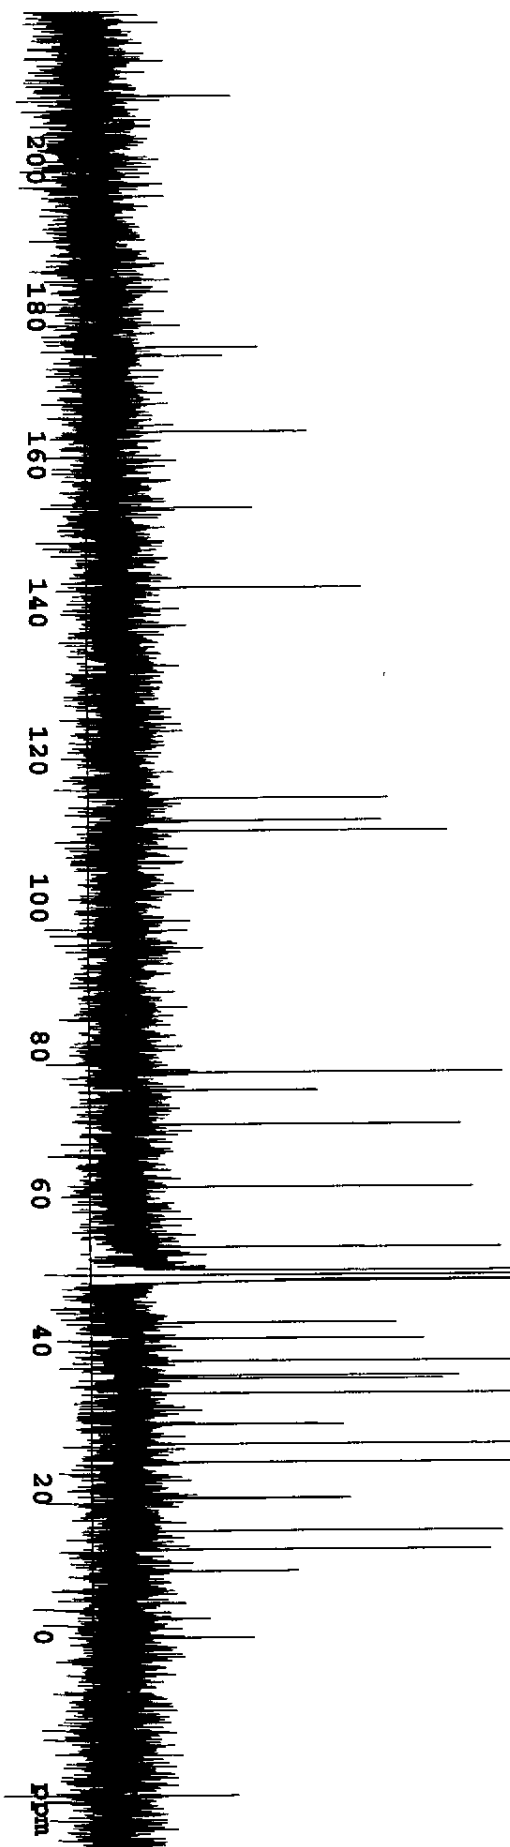

W08-11-15-2-CD3OD

Pulse Sequence: gpcosy

Solvent: CD3OD

Ambient Temperature

INOVA-400 "F1d"

Relax. delay 1.000 sec

Acq. time 0.205 sec

Width 5000.0 Hz

2D Width 5000.0 Hz

Single scan

128 Increments

OBSERVE H1, 399.7873831 MHz

DATA PROCESSING

Sq. sine bell 0.102 sec

F1 DATA PROCESSING

Sq. sine bell 0.026 sec

FW size 2048 x 2048

Total time 2 min, 56 sec

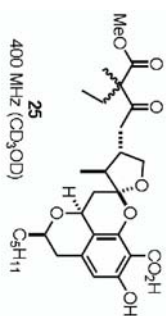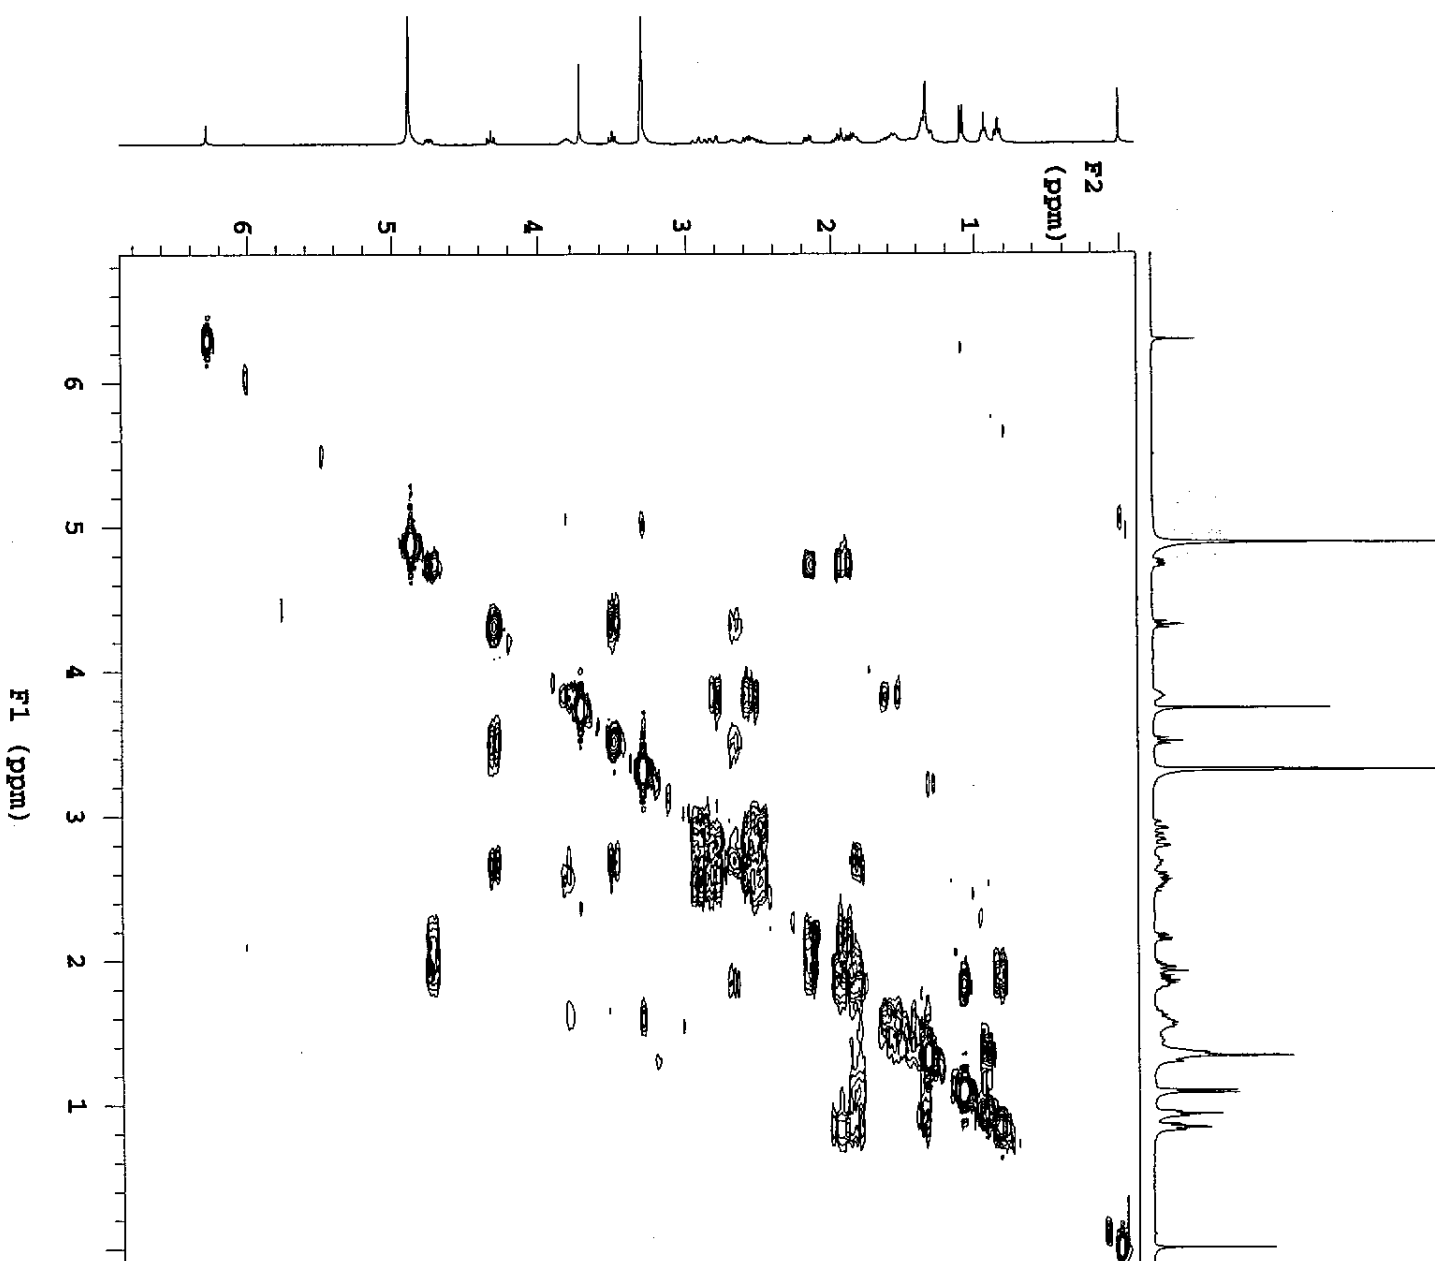

wxc-11-13-2

Pulse Sequence: zgpg30

Solvent: CDCl3

Ambient temperature

File: wxc-11-13-2

INOVA-500 "gamma"

Pulse 46.1 degrees

Acq. time 1.638 sec

Width 5000.0 Hz

69 repetitions

OBSERVE H1, 399.7857971 MHz

DATA PROCESSING

FT size 16384

Total time 3 min, 31 sec

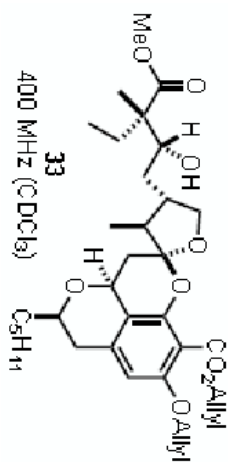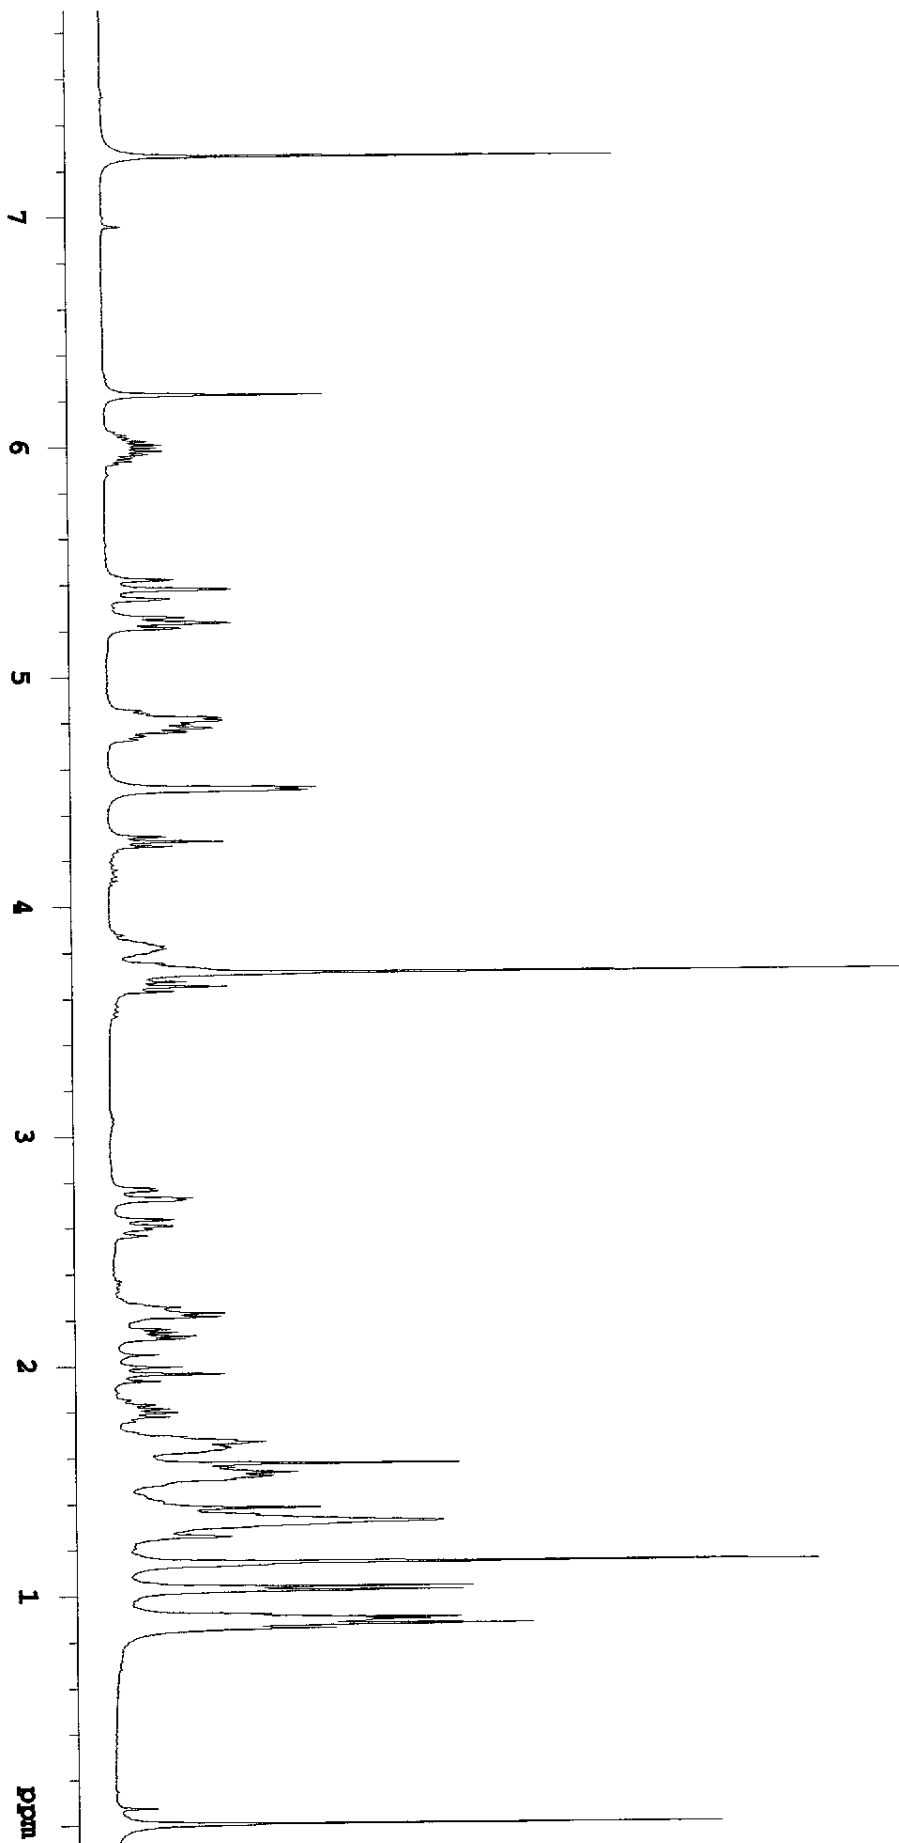

WXX-11-19-2c

| INDEX | FREQUENCY | PPM     | HEIGHT |
|-------|-----------|---------|--------|
| 1     | 17787.213 | 176.941 | 18.6   |
| 2     | 16653.449 | 165.663 | 18.0   |
| 3     | 15636.421 | 155.546 | 18.1   |
| 4     | 14987.140 | 149.087 | 17.8   |
| 5     | 13660.347 | 135.888 | 31.9   |
| 6     | 13365.844 | 132.959 | 37.6   |
| 7     | 13309.384 | 132.397 | 26.5   |
| 8     | 11878.829 | 118.166 | 37.9   |
| 9     | 11775.066 | 117.134 | 43.1   |
| 10    | 11524.814 | 114.645 | 25.6   |
| 11    | 11009.814 | 109.522 | 16.9   |
| 12    | 10909.104 | 108.520 | 33.7   |
| 13    | 10478.029 | 104.232 | 40.1   |
| 14    | 7772.563  | 77.319  | 133.2  |
| 15    | 7740.519  | 77.000  | 139.5  |
| 16    | 7708.475  | 76.681  | 133.9  |
| 17    | 7661.934  | 76.218  | 48.1   |
| 18    | 7570.378  | 75.308  | 45.9   |
| 19    | 7425.416  | 73.865  | 38.9   |
| 20    | 6974.504  | 69.380  | 52.0   |
| 21    | 6847.090  | 68.112  | 45.3   |
| 22    | 6598.364  | 65.638  | 49.4   |
| 23    | 5205.957  | 51.787  | 44.7   |
| 24    | 5149.498  | 51.225  | 41.7   |
| 25    | 4929.765  | 49.040  | 45.4   |
| 26    | 4269.802  | 42.475  | 51.8   |
| 27    | 3651.039  | 36.319  | 50.9   |
| 28    | 3549.565  | 35.310  | 41.3   |
| 29    | 3473.269  | 34.551  | 35.7   |
| 30    | 3459.535  | 34.414  | 43.2   |
| 31    | 3195.550  | 31.788  | 62.4   |
| 32    | 2852.980  | 28.380  | 42.1   |
| 33    | 2527.195  | 25.140  | 61.0   |
| 34    | 2272.365  | 22.605  | 69.4   |
| 35    | 1683.358  | 16.745  | 51.7   |
| 36    | 1410.980  | 14.036  | 61.1   |
| 37    | 1192.773  | 11.865  | 44.6   |
| 38    | 903.610   | 8.989   | 44.9   |

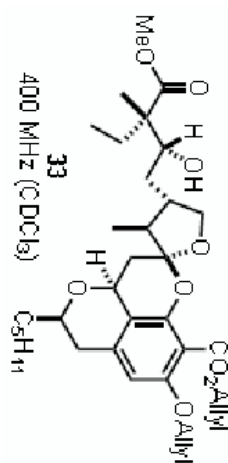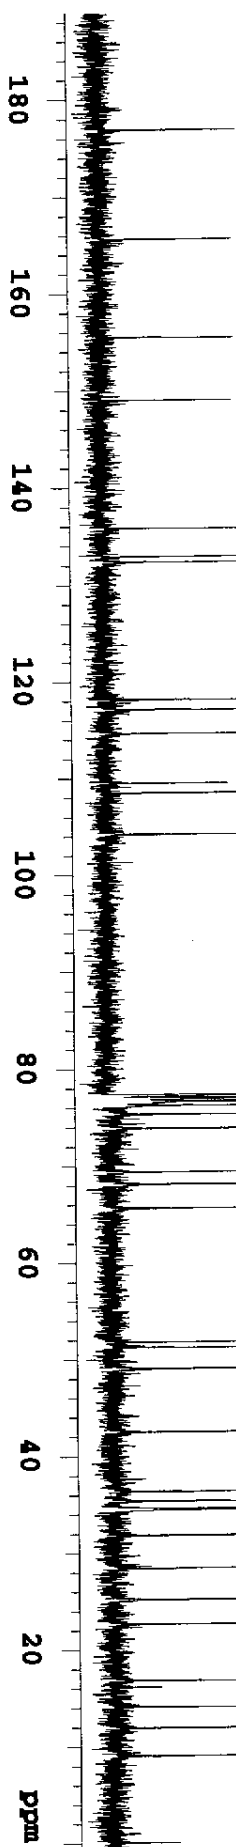



WXC-11-13-2

Pulse Sequence: gCOSY  
Solvent: CDCl<sub>3</sub>  
Ambient temperature  
File: WXC-11-13-2COSY  
INOVA-500 "gambler"

Relax. delay 1.000 sec  
Acq. time 0.205 sec  
Width 5000.0 Hz  
2D Width 5000.0 Hz  
Single scan  
128 increments  
OBSERVE H1, 399.7857971 MHz  
DATA PROCESSING  
Sq. sine bell 0.102 sec  
F1 DATA PROCESSING  
Sq. sine bell 0.026 sec  
F1 size 2048 x 2048  
Total time 2 min, 57 sec

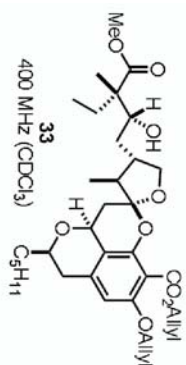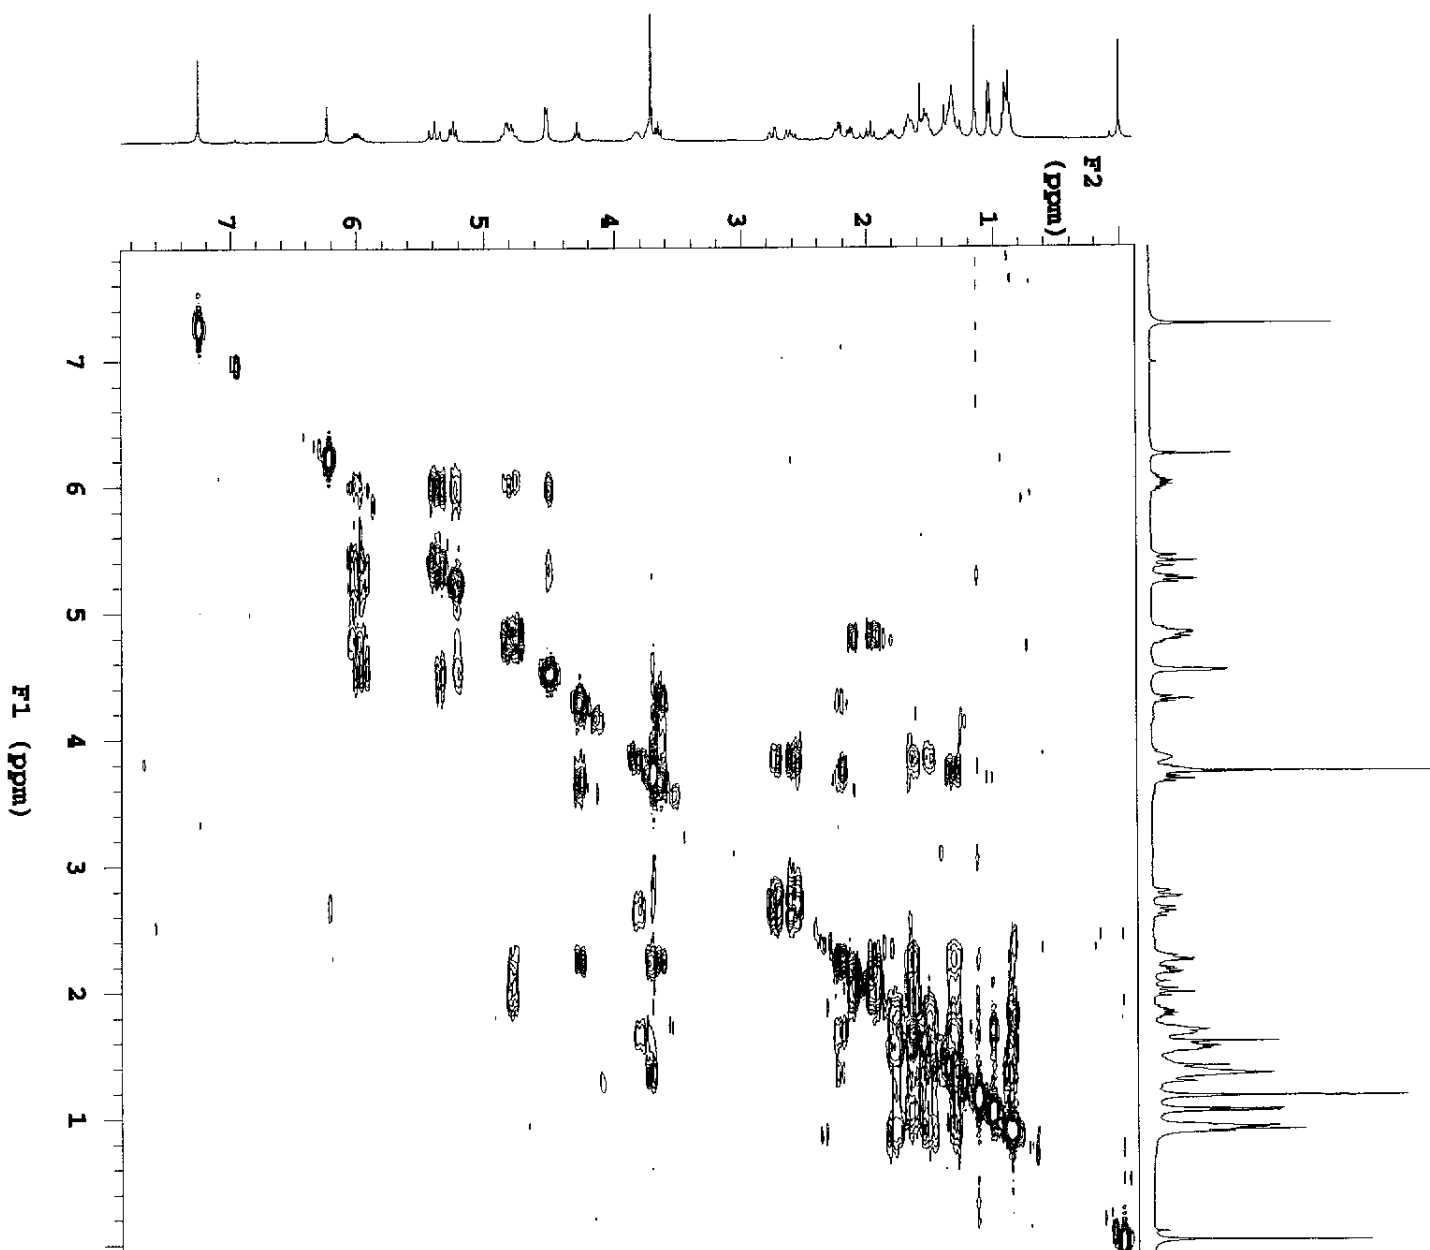

wzck-11-13-3

Pulse Sequence: s2pul

Solvent: CDCl3

Ambient temperature

File: wzck-11-13-3

INOVA-500 "gamble"

Pulse 46.1 degrees

Acq. time 1.638 sec

Width 5000.0 Hz

42 repetitions

OBSERVE H1, 399.7857971 MHz

DATA PROCESSING

FT size 16384

Total time 3 min, 31 sec

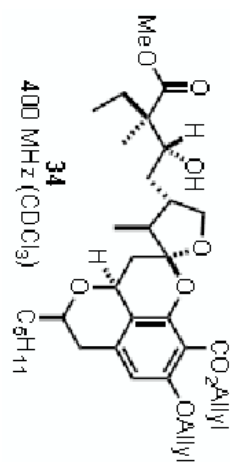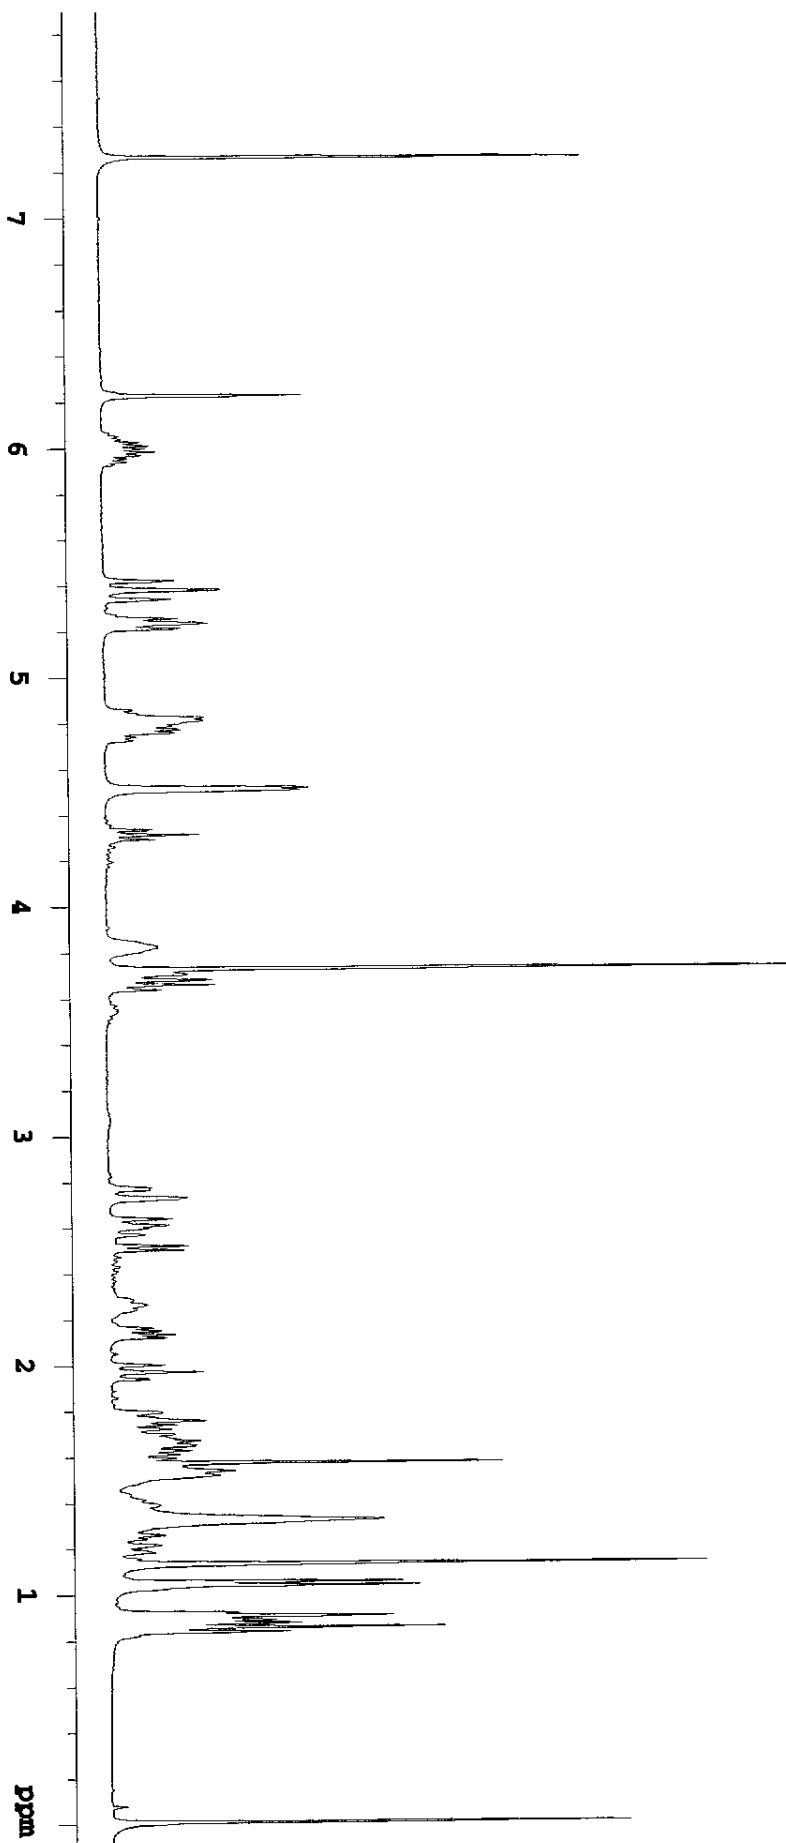

WXX-11-19-3C

| INDEX | FREQUENCY | PPM     | HEIGHT |
|-------|-----------|---------|--------|
| 1     | 17851.301 | 177.579 | 16.6   |
| 2     | 16650.398 | 165.632 | 16.4   |
| 3     | 15637.946 | 155.561 | 20.2   |
| 4     | 14988.665 | 149.102 | 16.4   |
| 5     | 13658.821 | 135.873 | 20.4   |
| 6     | 13365.844 | 133.959 | 34.3   |
| 7     | 13308.621 | 133.390 | 23.3   |
| 8     | 11873.488 | 118.113 | 35.3   |
| 9     | 11773.540 | 117.119 | 44.2   |
| 10    | 11524.052 | 114.637 | 18.3   |
| 11    | 11009.052 | 109.514 | 13.0   |
| 12    | 10899.948 | 108.429 | 30.1   |
| 13    | 10477.267 | 104.224 | 35.6   |
| 14    | 7772.563  | 77.319  | 105.9  |
| 15    | 7740.519  | 77.000  | 110.8  |
| 16    | 7708.475  | 76.681  | 111.3  |
| 17    | 7588.689  | 75.490  | 42.8   |
| 18    | 7569.616  | 75.300  | 43.8   |
| 19    | 7439.149  | 74.002  | 34.0   |
| 20    | 6973.742  | 69.372  | 54.6   |
| 21    | 6846.327  | 68.105  | 40.6   |
| 22    | 6596.838  | 65.623  | 42.8   |
| 23    | 5212.824  | 51.855  | 40.3   |
| 24    | 5171.624  | 51.446  | 29.8   |
| 25    | 4932.816  | 49.070  | 40.6   |
| 26    | 4279.720  | 42.573  | 42.6   |
| 27    | 3650.276  | 36.312  | 44.1   |
| 28    | 3475.558  | 34.574  | 36.1   |
| 29    | 3467.165  | 34.490  | 39.8   |
| 30    | 3458.772  | 34.407  | 41.0   |
| 31    | 3194.787  | 31.781  | 60.6   |
| 32    | 2975.817  | 29.602  | 38.1   |
| 33    | 2526.432  | 25.132  | 54.6   |
| 34    | 2271.602  | 22.597  | 66.5   |
| 35    | 1703.195  | 16.943  | 45.1   |
| 36    | 1410.217  | 14.038  | 59.9   |
| 37    | 1193.536  | 11.873  | 44.1   |
| 38    | 894.536   | 8.799   | 40.3   |

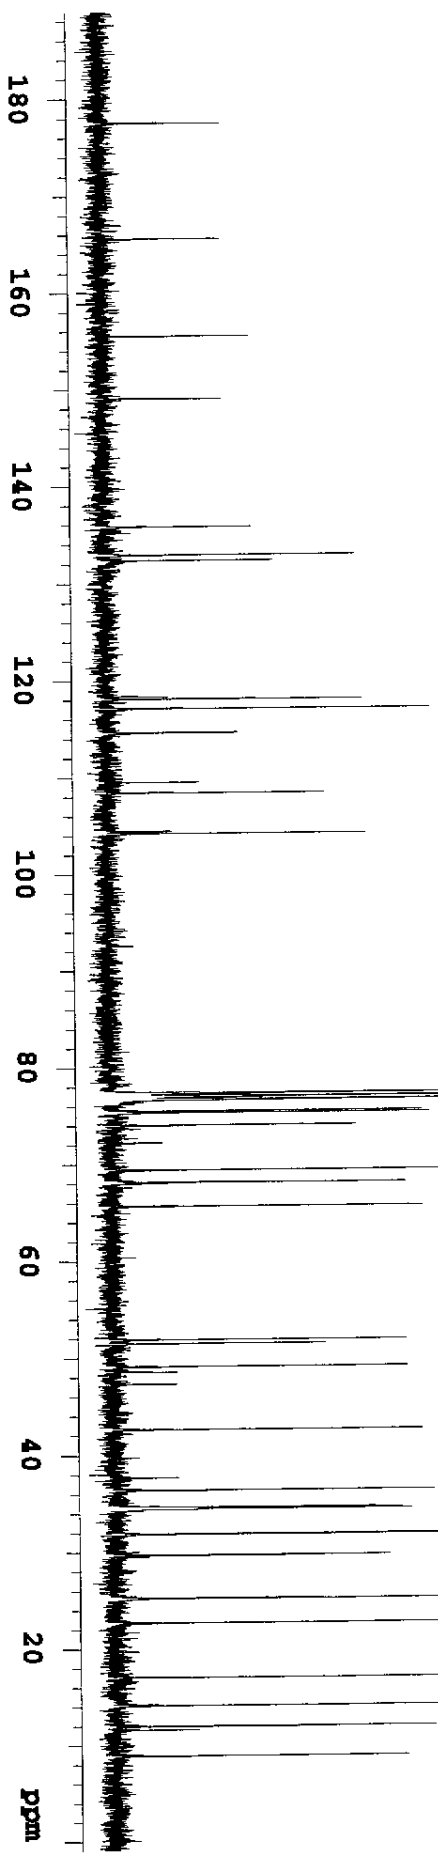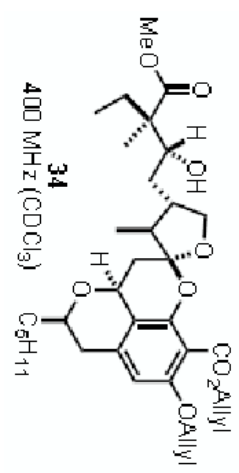

wzc-11-13-3

Pulse Sequence: gcosy  
 Solvent: CDCl3  
 Ambient temperature  
 File: wzc-11-13-3COSY  
 INOVA-500 "gamble"

Relax. delay 1.000 sec  
 Acq. time 0.205 sec  
 Width 5000.0 Hz  
 2D Width 5000.0 Hz  
 Single scan  
 128 increments  
 OBSERVE H1, 399.7857971 MHz  
 DATA PROCESSING  
 Sg. sine bell 0.102 sec  
 F1 DATA PROCESSING  
 Sg. sine bell 0.026 sec  
 FT size 2048 x 2048  
 Total time 2 min, 57 sec

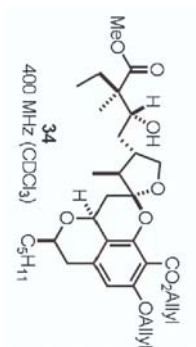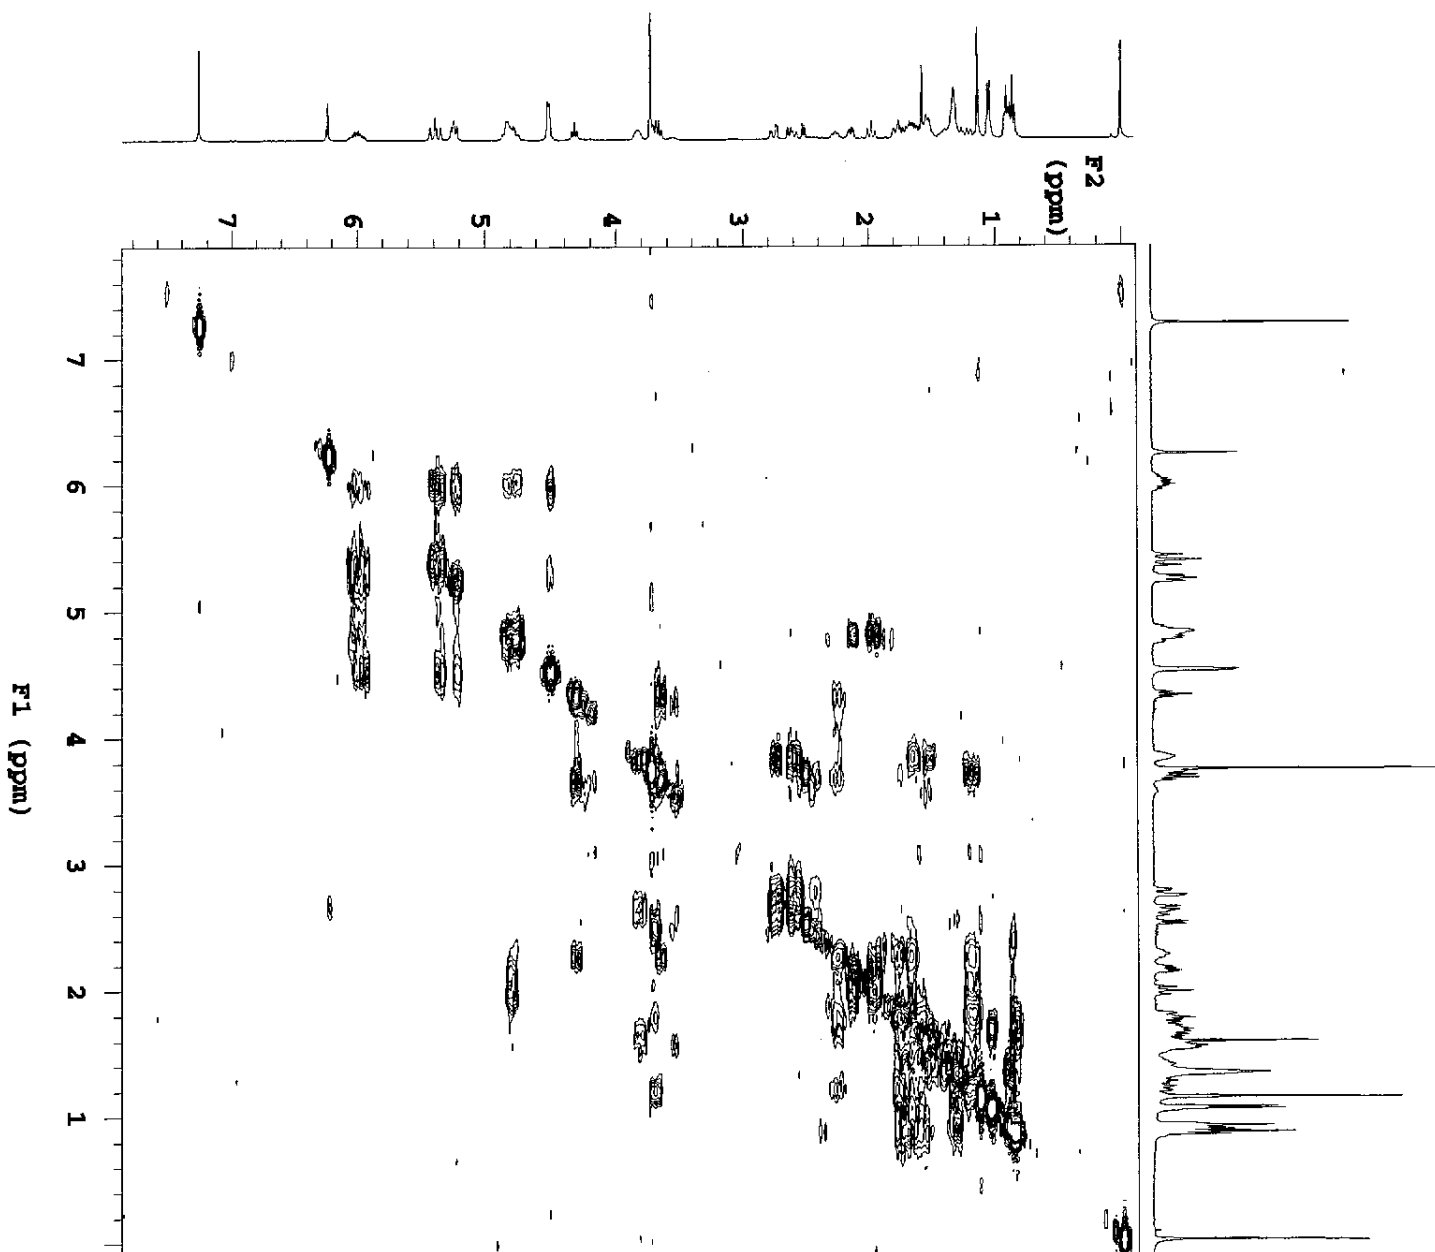



WXX-11-21-1C

| INDEX | FREQUENCY | PPM     | HEIGHT |
|-------|-----------|---------|--------|
| 1     | 20763.896 | 206.552 | 29.9   |
| 2     | 17436.717 | 173.454 | 19.7   |
| 3     | 16637.919 | 165.508 | 20.1   |
| 4     | 15637.706 | 155.558 | 31.4   |
| 5     | 14970.896 | 148.925 | 23.5   |
| 6     | 13654.826 | 135.833 | 35.4   |
| 7     | 13363.383 | 132.934 | 46.3   |
| 8     | 13290.141 | 132.206 | 31.3   |
| 9     | 11913.035 | 118.507 | 50.6   |
| 10    | 11776.469 | 117.148 | 54.9   |
| 11    | 11511.729 | 114.515 | 29.3   |
| 12    | 11023.448 | 109.657 | 17.2   |
| 13    | 10899.852 | 108.428 | 52.5   |
| 14    | 10494.731 | 104.398 | 50.9   |
| 15    | 7772.563  | 77.319  | 225.1  |
| 16    | 7740.519  | 77.000  | 233.0  |
| 17    | 7708.476  | 76.681  | 229.0  |
| 18    | 7572.673  | 75.330  | 56.2   |
| 19    | 7316.325  | 72.780  | 49.3   |
| 20    | 6975.291  | 69.388  | 74.0   |
| 21    | 6837.962  | 68.022  | 56.0   |
| 22    | 6602.977  | 65.684  | 65.7   |
| 23    | 6004.832  | 59.734  | 36.9   |
| 24    | 5265.544  | 52.380  | 57.1   |
| 25    | 4868.052  | 48.426  | 60.6   |
| 26    | 4225.657  | 42.035  | 60.1   |
| 27    | 3907.511  | 38.871  | 69.4   |
| 28    | 3648.875  | 36.298  | 63.5   |
| 29    | 3459.666  | 34.416  | 59.1   |
| 30    | 3456.614  | 34.385  | 64.8   |
| 31    | 3194.163  | 31.774  | 67.9   |
| 32    | 2800.486  | 27.858  | 55.8   |
| 33    | 2525.828  | 25.126  | 72.2   |
| 34    | 2272.532  | 22.606  | 76.3   |
| 35    | 1849.101  | 18.394  | 64.4   |
| 36    | 1410.411  | 14.030  | 62.2   |
| 37    | 1167.033  | 11.609  | 60.4   |
| 38    | 867.198   | 8.627   | 49.7   |

200 180 160 140 120 100 80 60 40 20 ppm

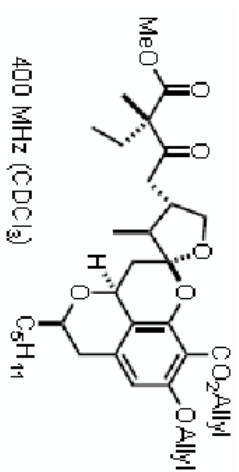

WXR-11-21-1

Pulse sequence: gcosy

Solvent: CDCl3

Ambient temperature

INOVA-400 "f1d"

Relax. delay 1.000 sec

Acq. time 0.205 sec

Width 5000.0 Hz

2D Width 5000.0 Hz

Single scan

128 increments

OBSERVE H1, 399.7858080 MHz

DATA PROCESSING

Sq. sine bell 0.102 sec

F1 DATA PROCESSING

Sq. sine bell 0.026 sec

FT size 2048 x 2048

Total time 2 min, 56 sec

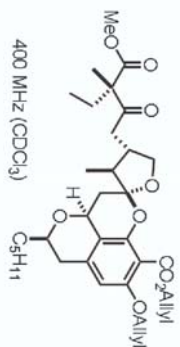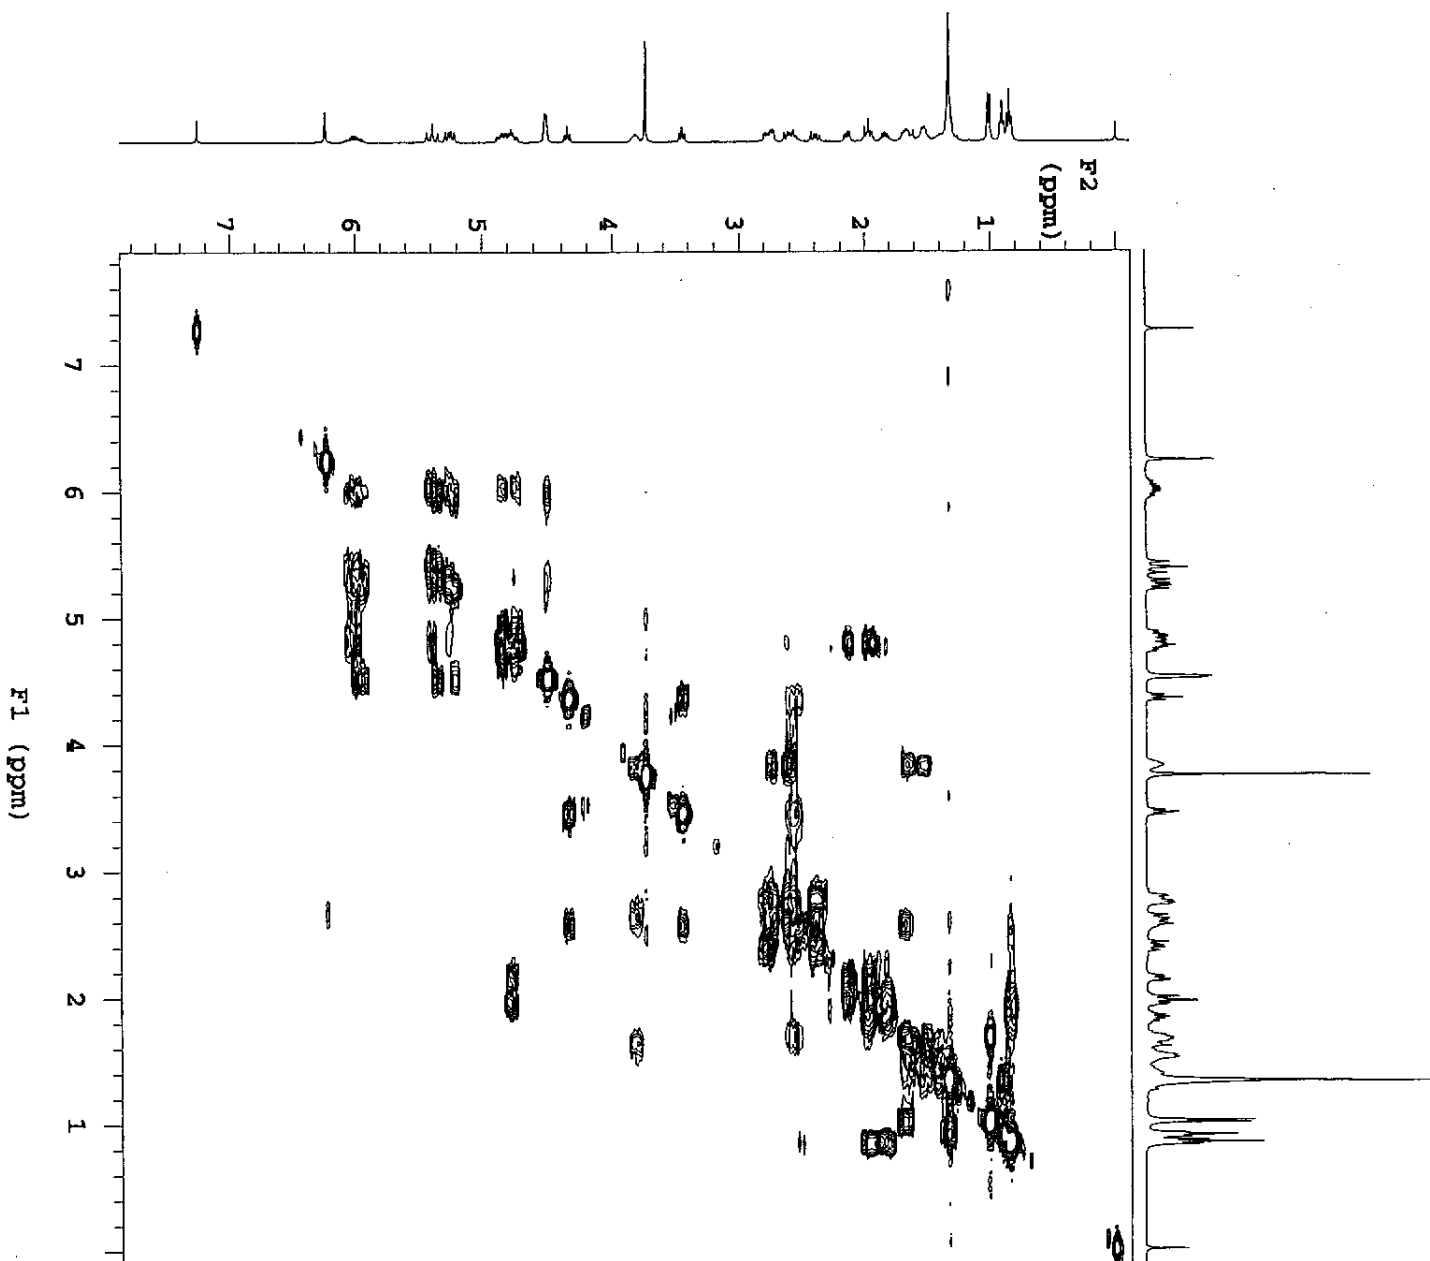

wxc-11-21-2

Pulse Sequence: s2pul

Solvent: CDCl3

Ambient temperature

File: wxc-11-21-2

INOVA-500 "gamma"

Pulse 46.1 degrees

Acq. time 1.638 sec

Width 5000.0 Hz

29 repetitions

OBSERVE H1, 399.7857971 MHz

DATA PROCESSING

Ft size 16384

Total time 3 min, 31 sec

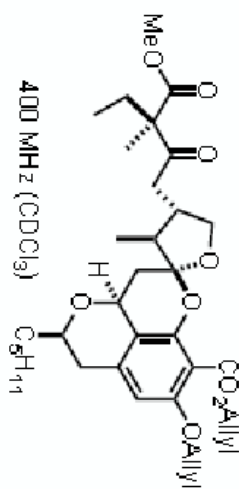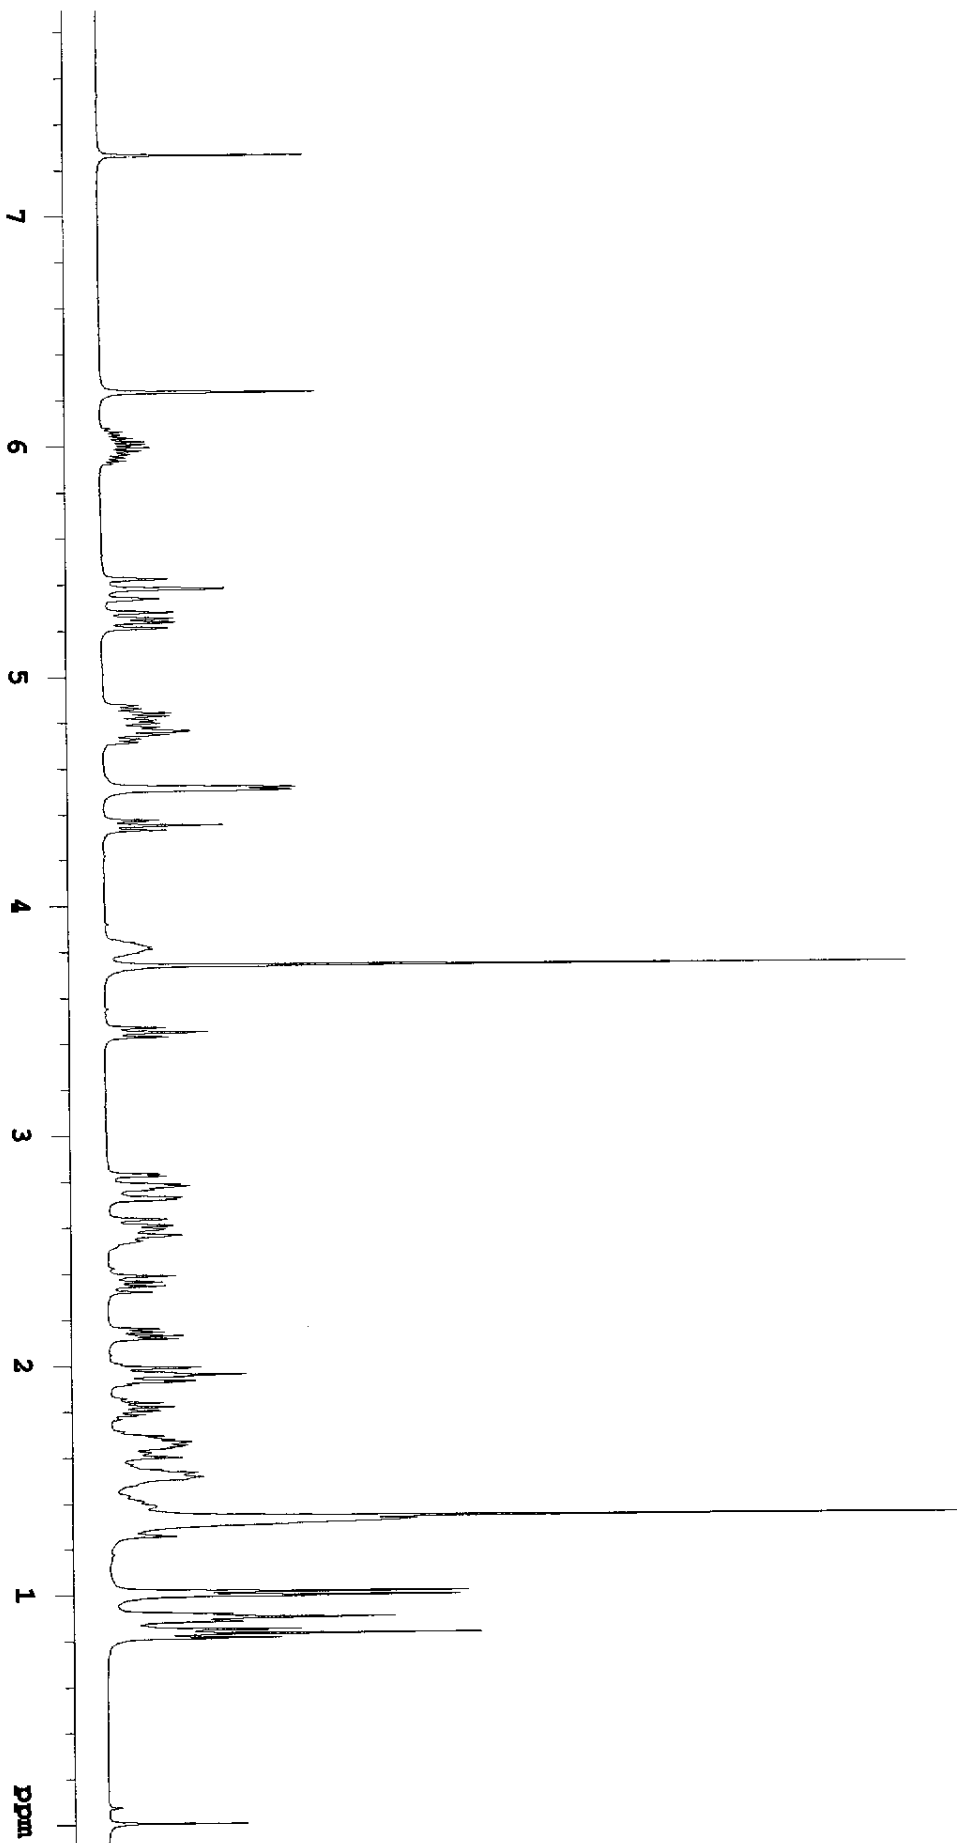



MX-11-21-2C

| INDEX | FREQUENCY PPM | PPM     | HEIGHT |
|-------|---------------|---------|--------|
| 1     | 20758.555     | 206.499 | 23.6   |
| 2     | 17436.717     | 173.454 | 28.7   |
| 3     | 16638.682     | 165.516 | 21.1   |
| 4     | 15639.231     | 155.574 | 32.0   |
| 5     | 14971.659     | 148.933 | 23.6   |
| 6     | 13656.352     | 135.849 | 40.5   |
| 7     | 13364.909     | 132.949 | 39.3   |
| 8     | 13291.667     | 132.221 | 27.8   |
| 9     | 11912.272     | 118.459 | 49.6   |
| 10    | 11777.232     | 117.156 | 59.8   |
| 11    | 11513.255     | 114.530 | 32.4   |
| 12    | 11024.211     | 109.665 | 15.6   |
| 13    | 10899.851     | 108.428 | 49.8   |
| 14    | 10495.494     | 104.406 | 52.9   |
| 15    | 7772.563      | 77.319  | 206.3  |
| 16    | 7740.519      | 77.000  | 217.3  |
| 17    | 7708.476      | 76.681  | 209.6  |
| 18    | 7573.435      | 75.338  | 57.9   |
| 19    | 7314.799      | 72.765  | 50.3   |
| 20    | 6976.054      | 69.395  | 71.8   |
| 21    | 6839.488      | 68.037  | 52.2   |
| 22    | 6603.739      | 65.692  | 62.8   |
| 23    | 6004.832      | 59.734  | 47.7   |
| 24    | 5267.069      | 52.395  | 48.9   |
| 25    | 4871.867      | 48.464  | 60.4   |
| 26    | 4224.894      | 42.028  | 60.5   |
| 27    | 3907.511      | 38.871  | 67.1   |
| 28    | 3649.638      | 36.305  | 63.8   |
| 29    | 3457.377      | 34.393  | 69.1   |
| 30    | 3194.926      | 31.782  | 74.6   |
| 31    | 2793.620      | 27.790  | 52.8   |
| 32    | 2526.591      | 25.134  | 74.8   |
| 33    | 2273.295      | 22.614  | 69.4   |
| 34    | 1840.708      | 18.311  | 59.0   |
| 35    | 1411.173      | 14.038  | 62.4   |
| 36    | 1167.796      | 11.617  | 58.9   |
| 37    | 863.383       | 8.589   | 50.3   |

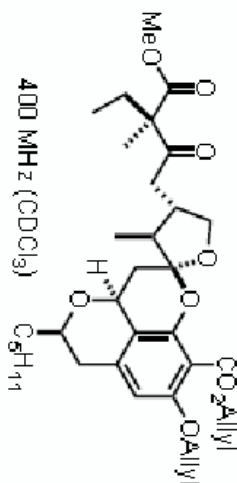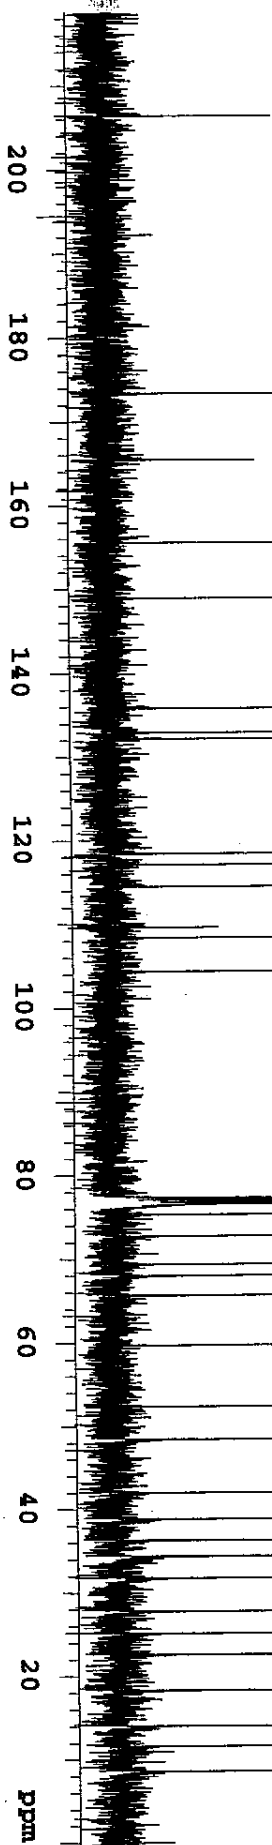

WX-11-21-2

Pulse Sequence: gcosy

Solvent: CDCl3

Ambient temperature

INOVA-400 "f1d"

Relax. delay 1.000 sec

Acq. time 0.205 sec

Width 5000.0 Hz

2D Width 5000.0 Hz

Single scan

128 increments

OBSERVE H1, 399.7858086 MHz

DATA PROCESSING

Sq. sine bell 0.102 sec

F1 DATA PROCESSING

Sq. sine bell 0.026 sec

FT size 2048 x 2048

Total time 2 min, 56 sec

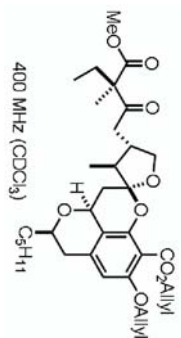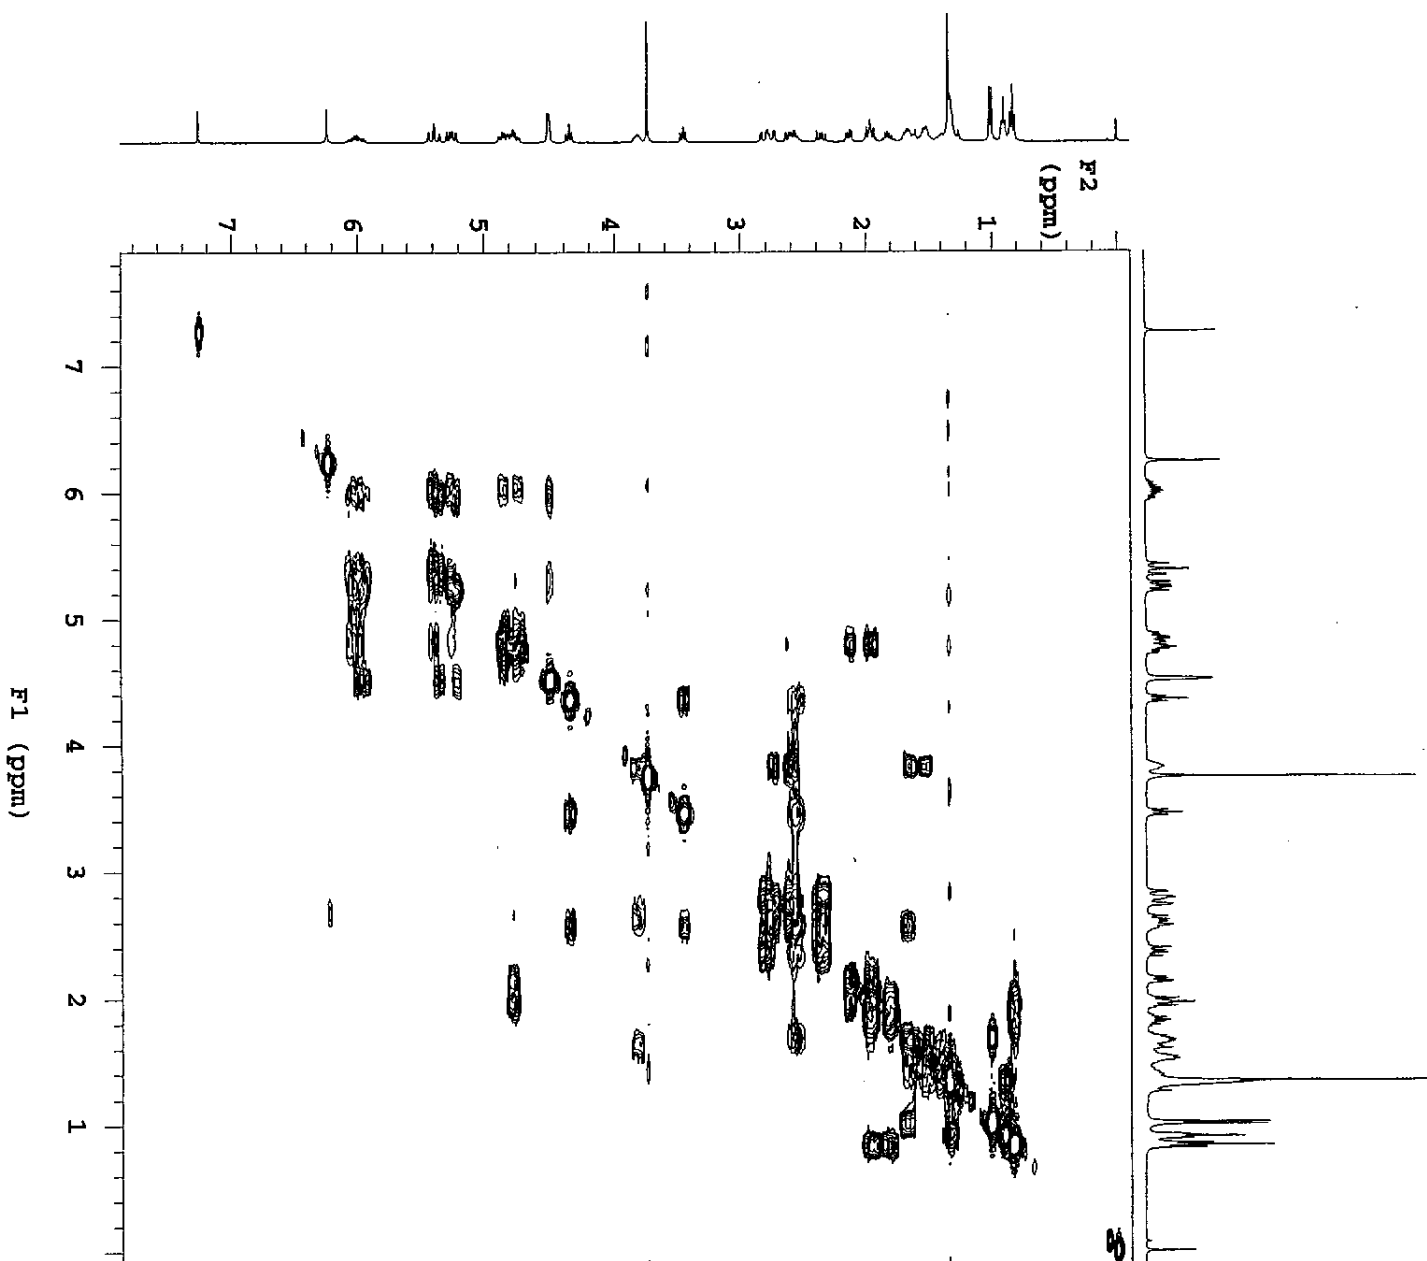

wack-11-23-5

Pulse Sequence: szpul

Solvent: CDCl3

Ambient temperature

File: wack-11-23-5

INOVA-500 "gamble"

Pulse 46.1 degrees

Acq. time 1.638 sec

Width 8000.0 Hz

31 repetitions

OBSERVE F1, 399.7857971 MHz

DATA PROCESSING

FT size 32768

Total time 3 min, 31 sec

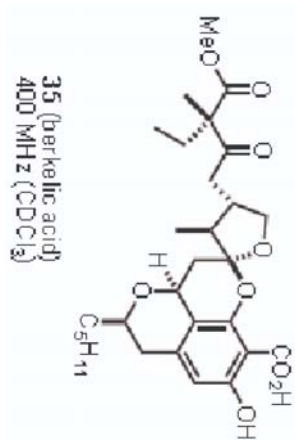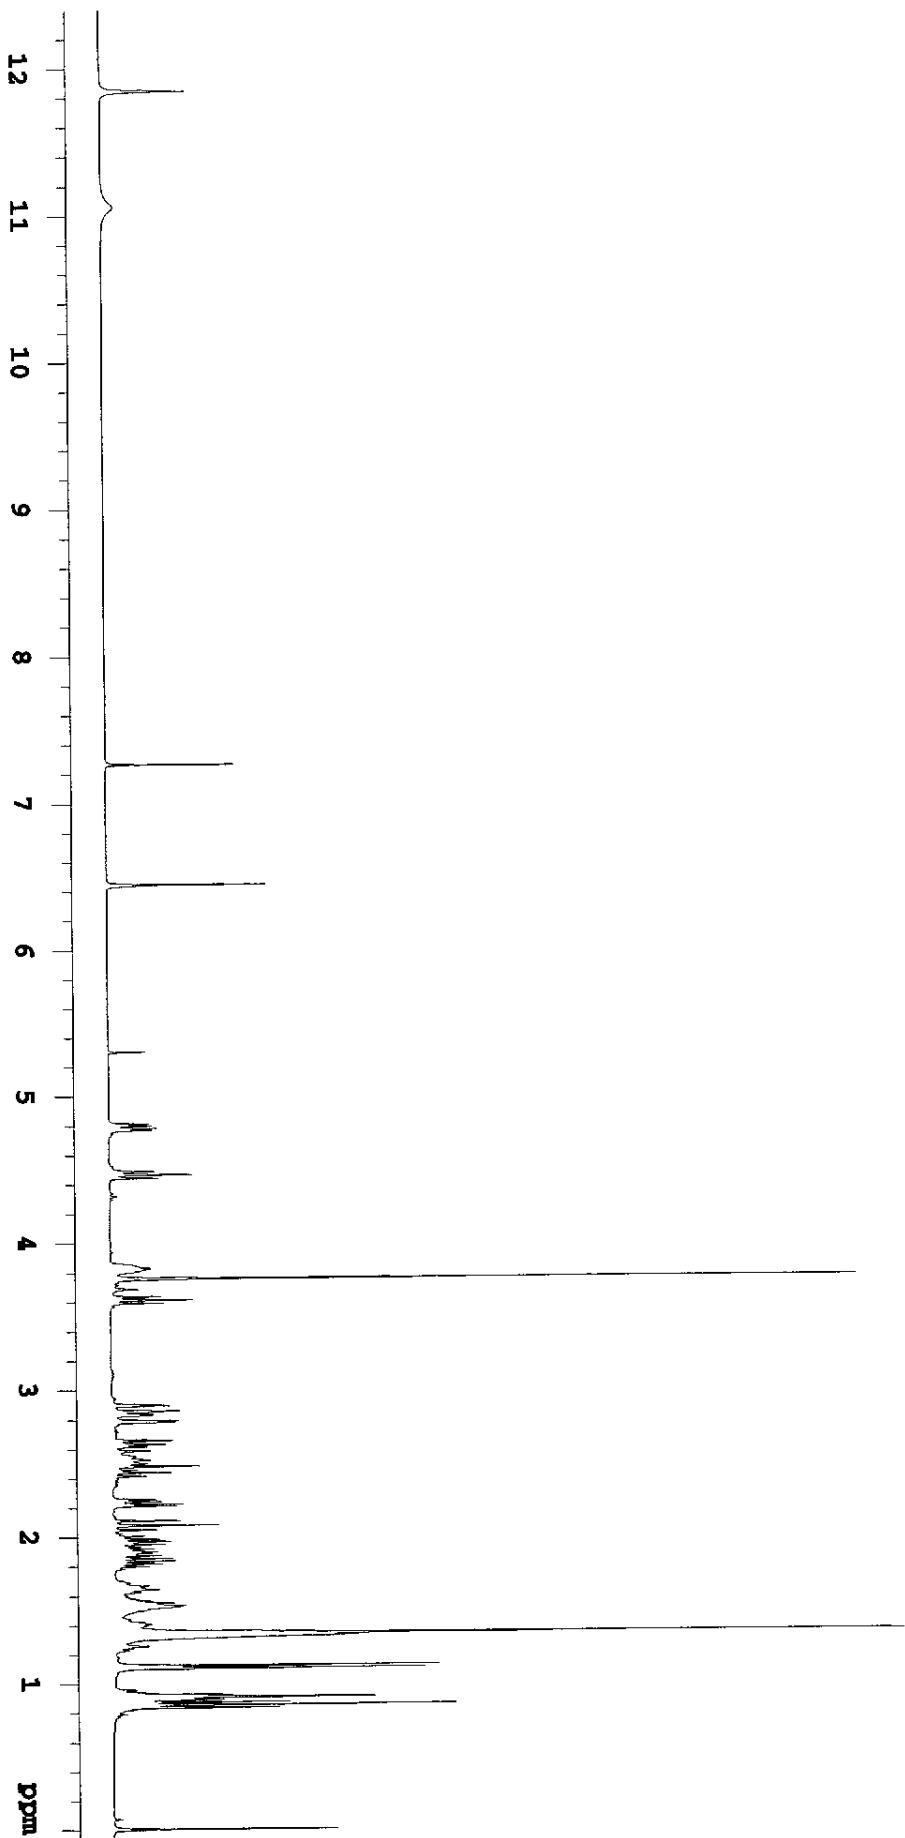

WX-11-23-5C in CDCl<sub>3</sub>

| INDEX | FREQUENCY | PPM     | HEIGHT |
|-------|-----------|---------|--------|
| 1     | 20713.779 | 206.044 | 22.0   |
| 2     | 17426.798 | 173.356 | 19.0   |
| 3     | 17139.170 | 170.495 | 27.5   |
| 4     | 16338.847 | 162.533 | 32.9   |
| 5     | 15055.583 | 149.768 | 20.4   |
| 6     | 14296.458 | 142.216 | 27.6   |
| 7     | 11275.981 | 112.170 | 59.2   |
| 8     | 11107.371 | 110.492 | 47.1   |
| 9     | 9914.897  | 98.630  | 23.0   |
| 10    | 7772.563  | 77.319  | 259.7  |
| 11    | 7740.519  | 77.000  | 265.4  |
| 12    | 7708.476  | 76.681  | 257.4  |
| 13    | 7560.465  | 75.209  | 48.6   |
| 14    | 7391.093  | 73.524  | 41.0   |
| 15    | 6759.379  | 67.240  | 45.8   |
| 16    | 6005.595  | 59.742  | 30.7   |
| 17    | 5276.225  | 52.486  | 45.7   |
| 18    | 4845.164  | 48.198  | 53.6   |
| 19    | 4178.355  | 41.565  | 50.6   |
| 20    | 3955.577  | 39.349  | 48.9   |
| 21    | 3643.534  | 36.245  | 56.7   |
| 22    | 3448.222  | 34.302  | 78.1   |
| 23    | 3191.874  | 31.752  | 69.2   |
| 24    | 2805.827  | 27.911  | 49.4   |
| 25    | 2515.147  | 25.020  | 53.4   |
| 26    | 2270.243  | 22.584  | 60.4   |
| 27    | 1850.627  | 18.409  | 50.3   |
| 28    | 1410.411  | 14.030  | 57.4   |
| 29    | 1205.943  | 11.996  | 50.9   |
| 30    | 871.775   | 8.672   | 42.4   |

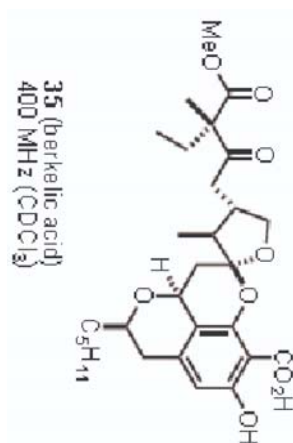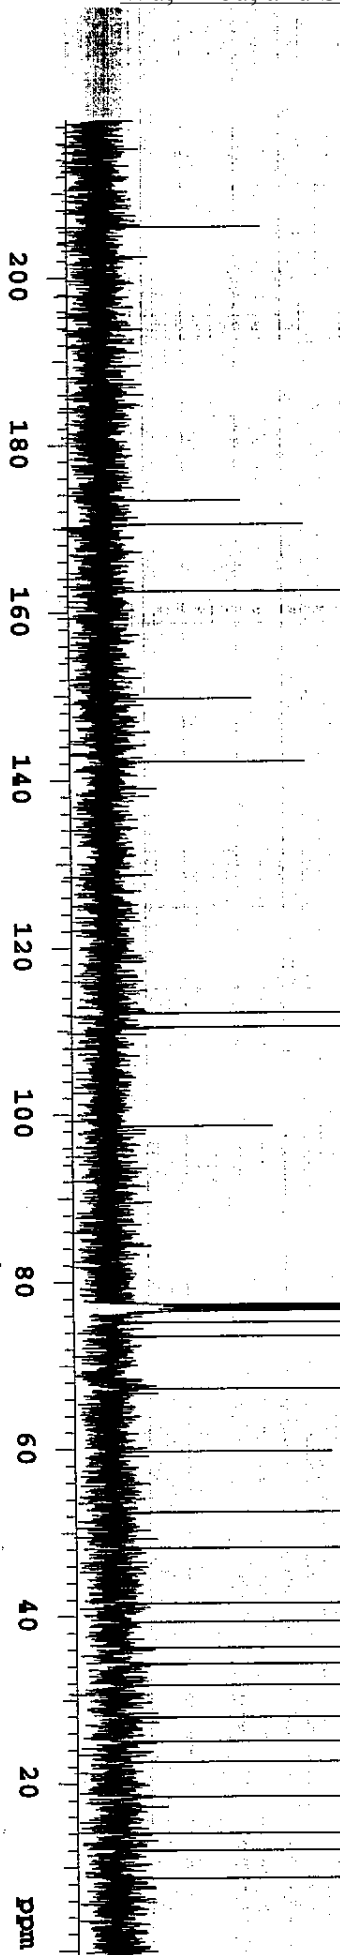

W00X-11-23-5

Pulse Sequence: gCOSY

Solvent: CDCl3

Ambient Temperature

INOVA-400 "fid"

Relax. delay 1.000 sec

Acq. time 0.128 sec

Width 8000.0 Hz

2D Width 8000.0 Hz

Single scan

128 increments

OBSERVE H1, 399.7658084 MHz

DATA PROCESSING

Sq. sine bell 0.064 sec

F1 DATA PROCESSING

Sq. sine bell 0.016 sec

FT size 2048 x 2048

Total time 2 min, 45 sec

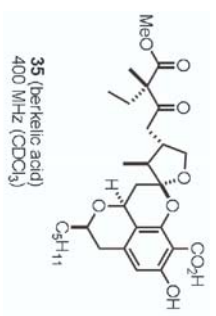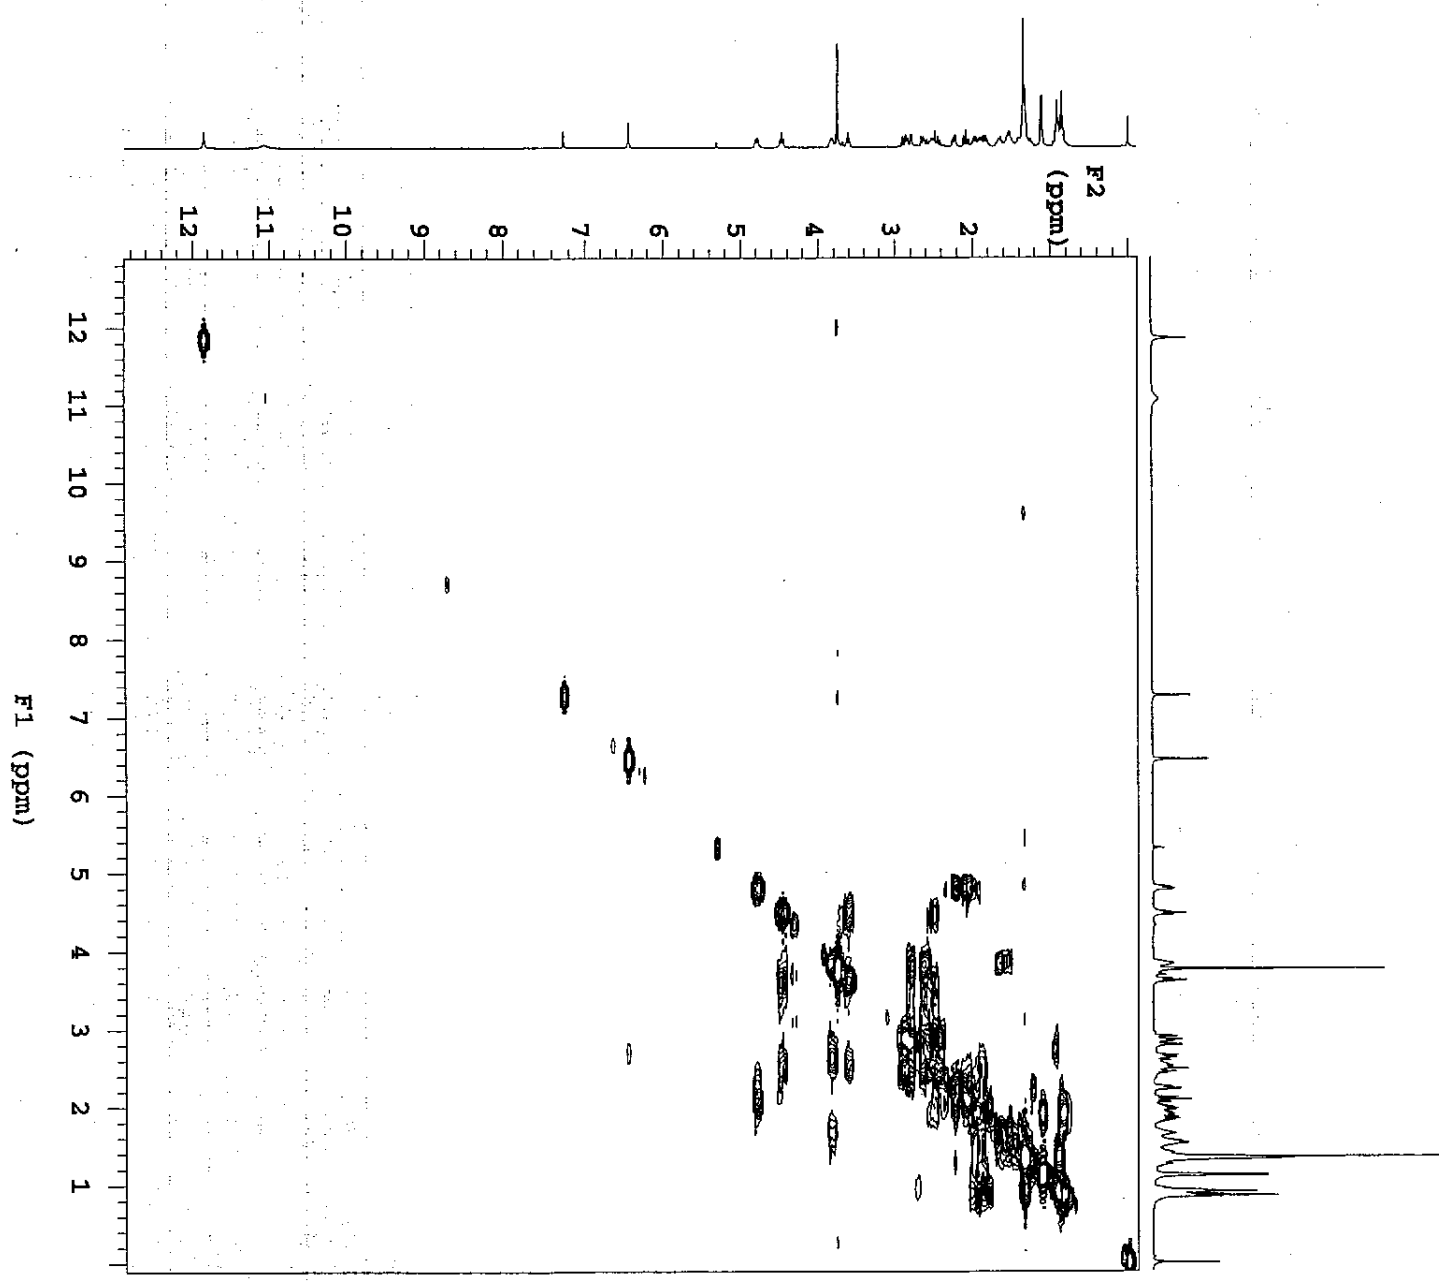

wxc-11-23-5-CD3OD--500 M

Pulse Sequence: s2pul

Solvent: CD3OD

Temp. 25.0 C / 298.1 K

File: wxc-11-23-5-CD3OD

INOVA-500 "echo"

Pulse 47.4 degrees

Acq. time 1.892 sec

Width 8000.0 Hz

66 repetitions

OBSERVE H1, 499.8040886 MHz

DATA PROCESSING

F1 size 32768

Total time 4 min, 3 sec

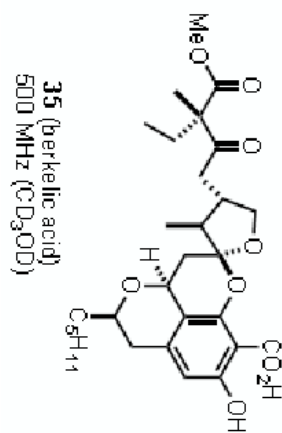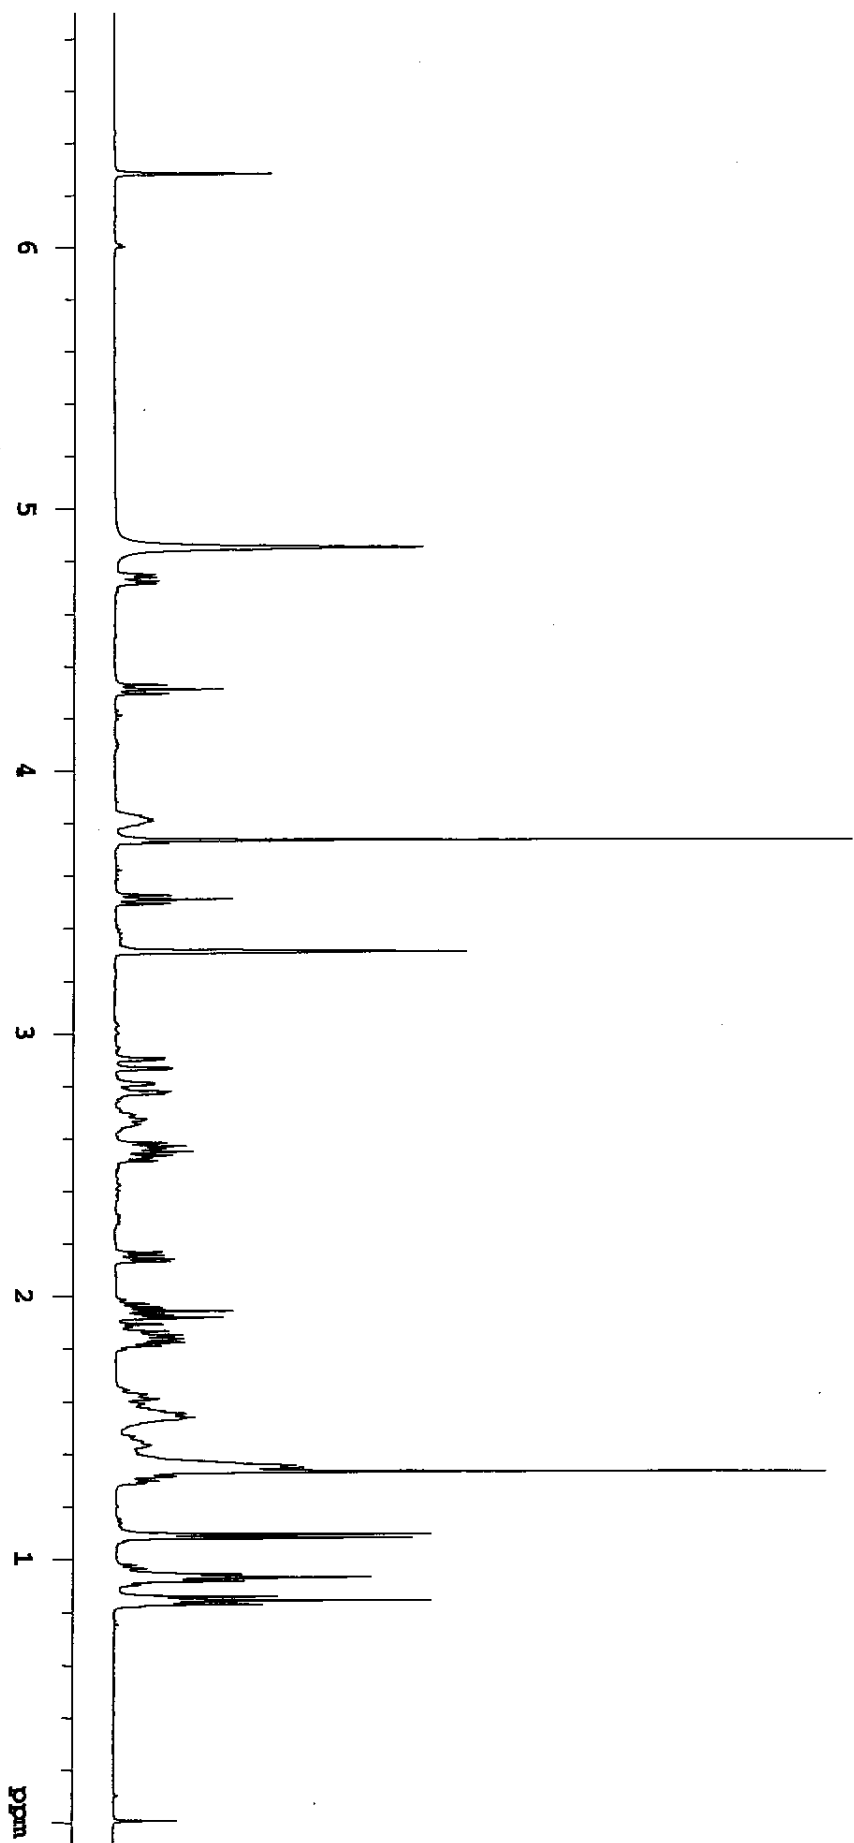

## (-)-Berkelic Acid

Wu, Zhou, and Snider

WXX-11-23-5-CD<sub>3</sub>OD-C

| INDEX | FREQUENCY | PPM     | HEIGHT |
|-------|-----------|---------|--------|
| 1     | 20989.487 | 208.796 | 36.3   |
| 2     | 17575.333 | 174.833 | 31.6   |
| 3     | 17457.078 | 173.657 | 17.4   |
| 4     | 16424.058 | 163.380 | 37.6   |
| 5     | 15387.986 | 153.074 | 27.7   |
| 6     | 14303.086 | 142.282 | 40.9   |
| 7     | 11435.960 | 113.761 | 33.6   |
| 8     | 11131.547 | 110.732 | 52.2   |
| 9     | 10993.455 | 109.359 | 43.8   |
| 10    | 10167.954 | 101.147 | 14.3   |
| 11    | 7695.267  | 76.550  | 43.8   |
| 12    | 7455.705  | 74.167  | 40.4   |
| 13    | 6985.734  | 69.491  | 43.8   |
| 14    | 6135.056  | 61.029  | 57.1   |
| 15    | 5313.371  | 52.855  | 55.0   |
| 16    | 4989.884  | 49.638  | 349.0  |
| 17    | 4968.522  | 49.425  | 1186.2 |
| 18    | 4947.160  | 49.213  | 2434.1 |
| 19    | 4925.797  | 49.000  | 2539.8 |
| 20    | 4904.435  | 48.787  | 2206.7 |
| 21    | 4883.073  | 48.575  | 1207.1 |
| 22    | 4861.710  | 48.362  | 352.7  |
| 23    | 4284.165  | 42.617  | 49.7   |
| 24    | 4069.016  | 40.477  | 46.6   |
| 25    | 3762.315  | 37.426  | 49.0   |
| 26    | 3562.424  | 35.438  | 44.2   |
| 27    | 3521.226  | 35.028  | 37.7   |
| 28    | 3321.336  | 33.039  | 68.9   |
| 29    | 2904.771  | 28.896  | 49.1   |
| 30    | 2382.920  | 23.704  | 56.3   |
| 31    | 2631.638  | 26.179  | 74.7   |
| 32    | 1899.979  | 18.900  | 64.0   |
| 33    | 1449.082  | 14.415  | 67.4   |
| 34    | 1196.549  | 11.903  | 42.5   |
| 35    | 904.343   | 8.996   | 39.7   |

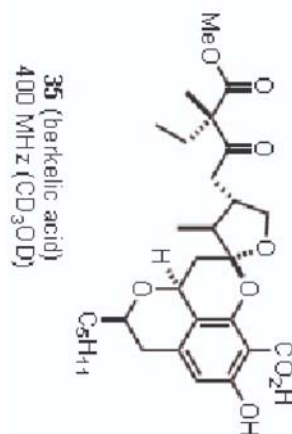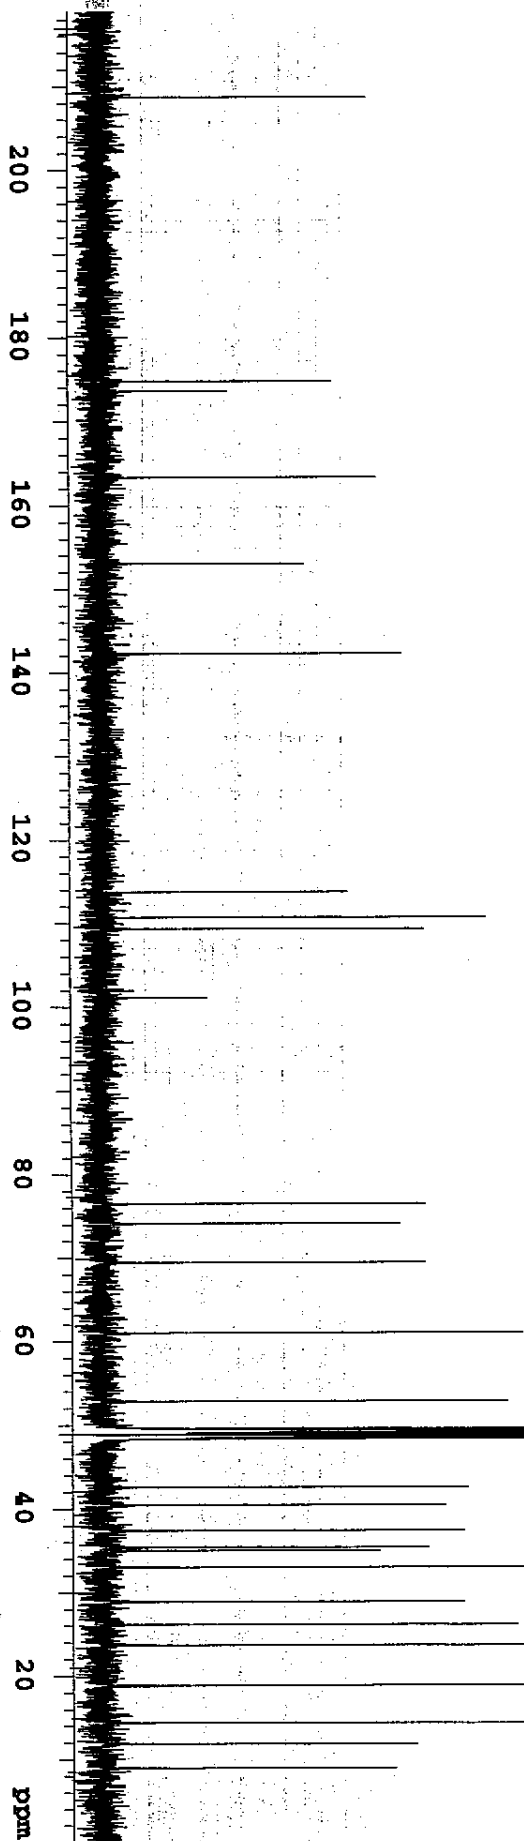

vzck-11-23-5-CD3OD

Pulse Sequence: gcosy

Solvent: CD3OD

Ambient temperature

INNOVA-400 "FID"

Relax. delay 1.000 sec

Acq. time 0.205 sec

Width 5000.0 Hz

2D Width 5000.0 Hz

Single scan

128 increments

OBSERVE H1, 399.7873871 MHz

DATA PROCESSING

Sq. sine bell 0.102 sec

F1 DATA PROCESSING

Sq. sine bell 0.026 sec

FF size 2048 x 2048

Total time 2 min, 56 sec

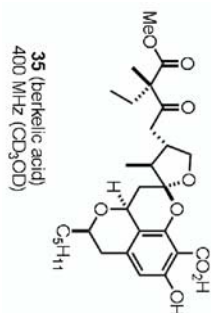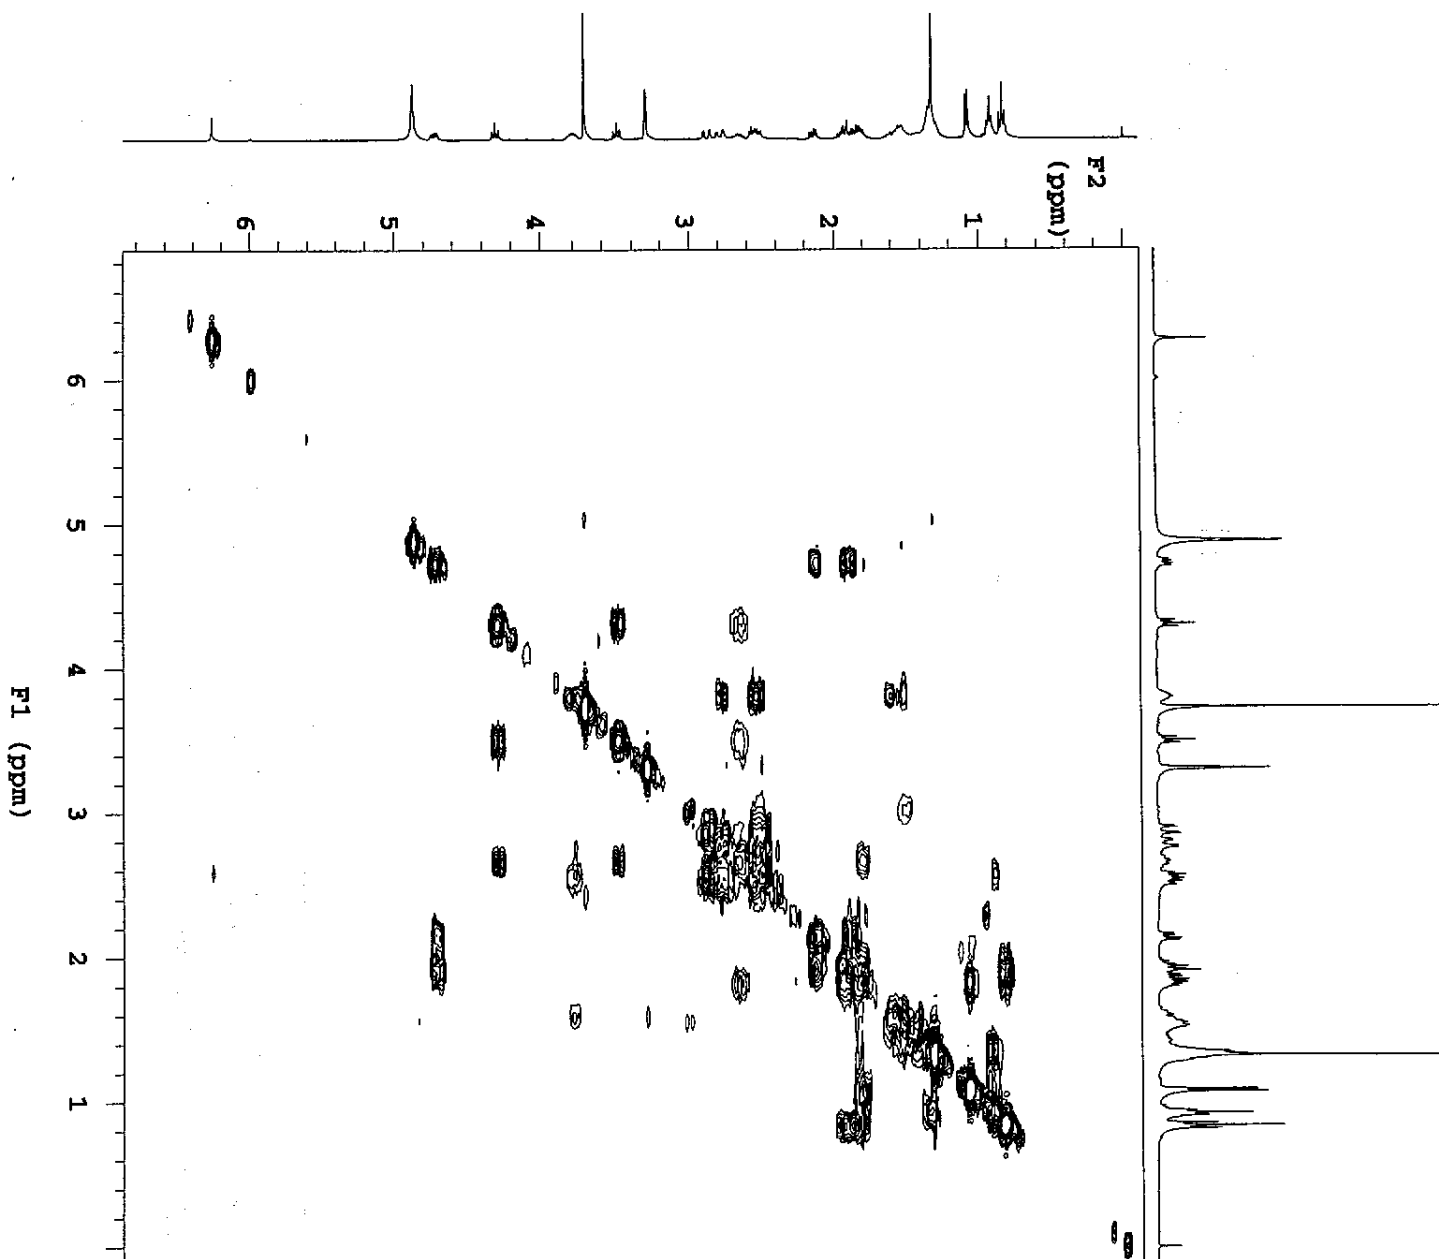



wack-11-23-6

Pulse Sequence: s2pul

Solvent: CDCl3

Ambient temperature

File: wack-11-23-6

INOVA-500 "gamble"

Pulse 46.1 degrees

Acq. time 1.638 sec

Width 8000.0 Hz

18 repetitions

OBSERVE H1, 399.7857971 MHz

DATA PROCESSING

FT size 32768

Total time 3 min, 31 sec

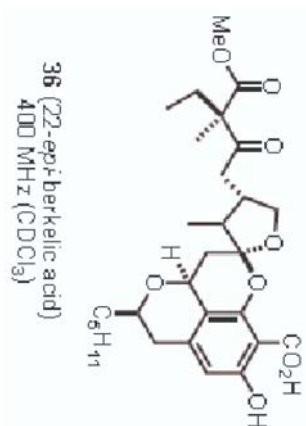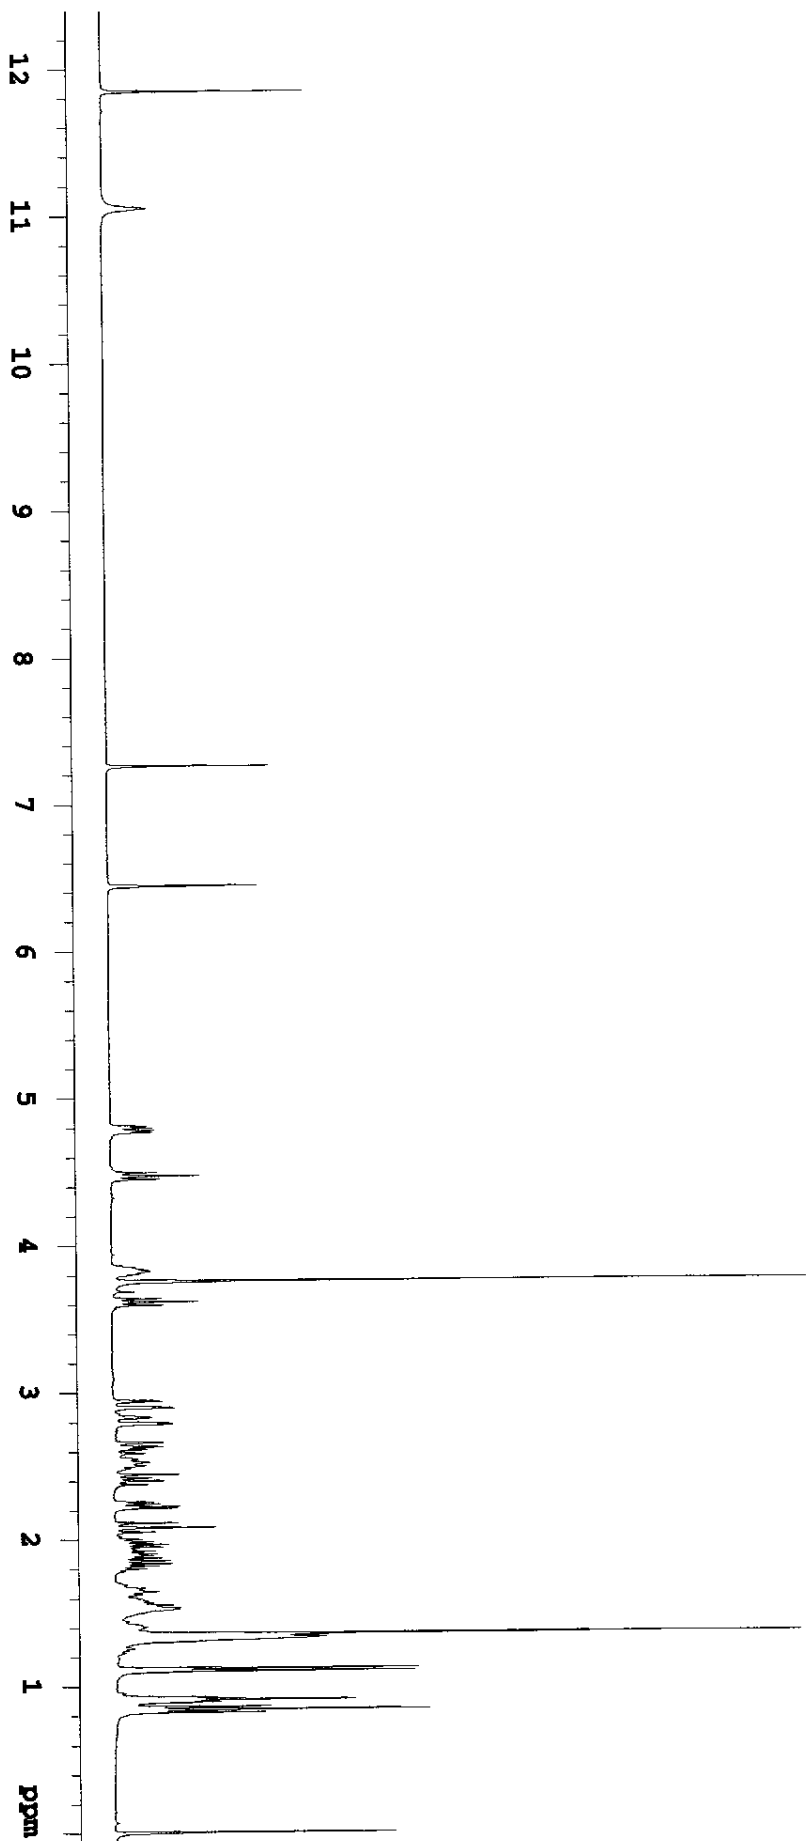

WX-11-23-6C in CDCl<sub>3</sub>

| INDEX | FREQUENCY | PPM     | HEIGHT |
|-------|-----------|---------|--------|
| 1     | 20705.149 | 205.968 | 14.9   |
| 2     | 17137.644 | 170.479 | 22.2   |
| 3     | 16338.847 | 162.533 | 26.9   |
| 4     | 15055.583 | 149.768 | 22.7   |
| 5     | 14295.695 | 142.209 | 30.5   |
| 6     | 11374.455 | 112.154 | 48.6   |
| 7     | 11108.134 | 110.500 | 53.2   |
| 8     | 9914.897  | 98.630  | 19.9   |
| 9     | 7772.563  | 77.319  | 331.6  |
| 10    | 7740.519  | 77.000  | 353.3  |
| 11    | 7708.476  | 76.681  | 350.7  |
| 12    | 7560.465  | 75.209  | 63.8   |
| 13    | 7389.567  | 73.509  | 48.9   |
| 14    | 6760.142  | 67.248  | 52.3   |
| 15    | 6004.069  | 59.726  | 34.9   |
| 16    | 5277.751  | 52.501  | 52.8   |
| 17    | 4846.690  | 48.213  | 63.1   |
| 18    | 4176.066  | 41.542  | 56.4   |
| 19    | 3954.814  | 39.341  | 63.2   |
| 20    | 3643.534  | 36.245  | 59.0   |
| 21    | 3448.222  | 34.302  | 88.3   |
| 22    | 3191.874  | 31.752  | 61.4   |
| 23    | 2799.723  | 27.851  | 49.3   |
| 24    | 2515.910  | 25.027  | 67.7   |
| 25    | 2271.006  | 22.591  | 63.5   |
| 26    | 1843.760  | 18.341  | 57.7   |
| 27    | 1411.173  | 14.038  | 58.4   |
| 28    | 1206.706  | 12.004  | 55.1   |
| 29    | 866.435   | 8.619   | 41.3   |
| 30    | -1.790    | -0.018  | 13.4   |

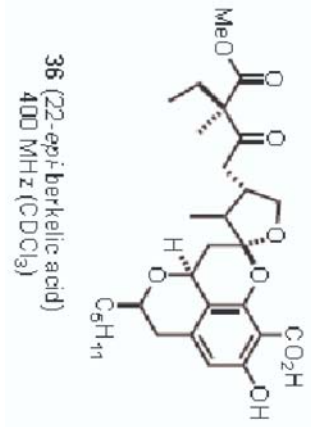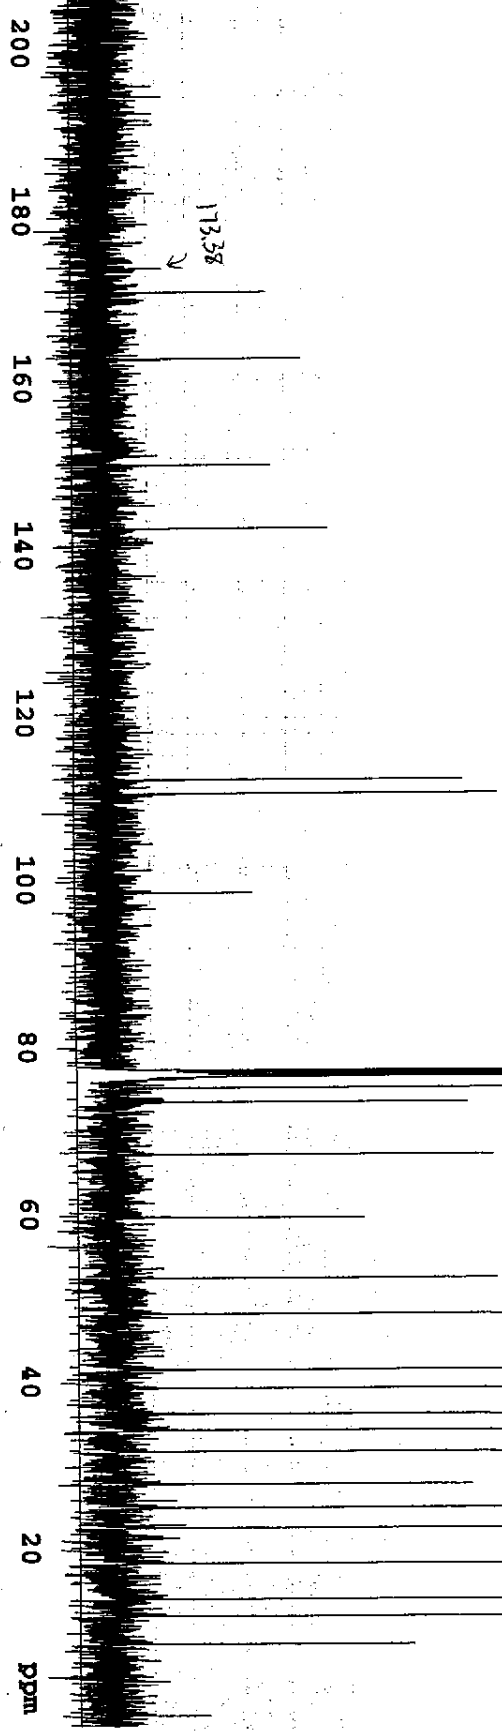

WKK-11-23-6

Pulse Sequence: gcosy

Solvent: CDCl3

Ambient temperature

INOVA-400 "F1A"

Relax. delay 1.000 sec

Acq. time 0.128 sec

Width 8000.0 Hz

2D Width 8000.0 Hz

Single scan

128 increments

OBSERVE H1, 399.7858084 MHz

DATA PROCESSING

Sq. sine bell 0.064 sec

F1 DATA PROCESSING

Sq. sine bell 0.016 sec

FT size 2048 x 2048

Total time 2 min, 45 sec

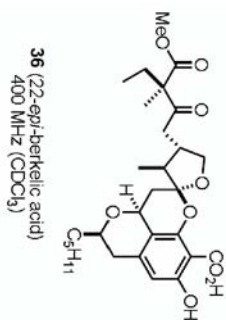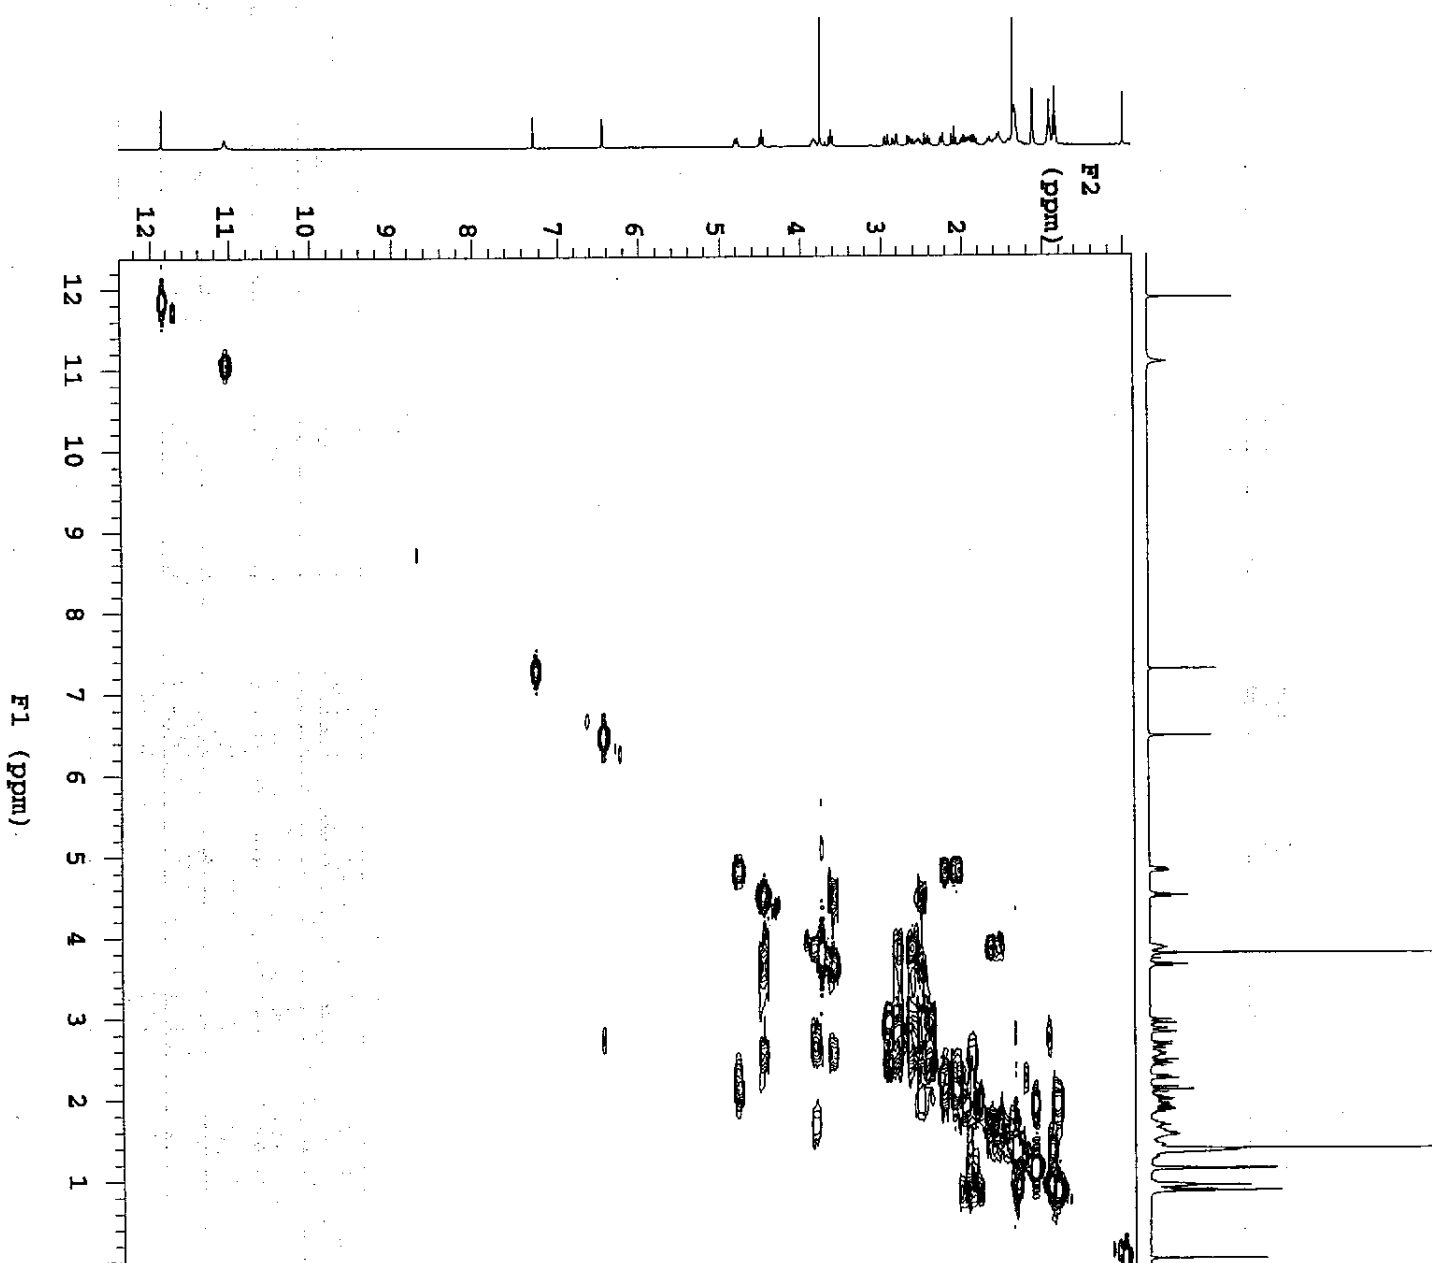

WRR-11-23-6-CD3OD - 500M

Pulse Sequence: zgpg30

Solvent: CD3OD

Temp. 25.0 C / 298.1 K

INOVN-500 "echo"

Pulse 47.4 degrees

Acq. time 1.892 sec

Width 8000.0 Hz

28 repetitions

OBSERVE H1, 499.8040901 MHz

DATA PROCESSING

FT size 32768

Total time 4 min, 3 sec

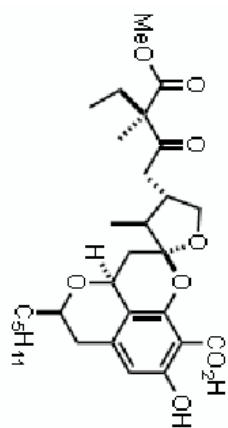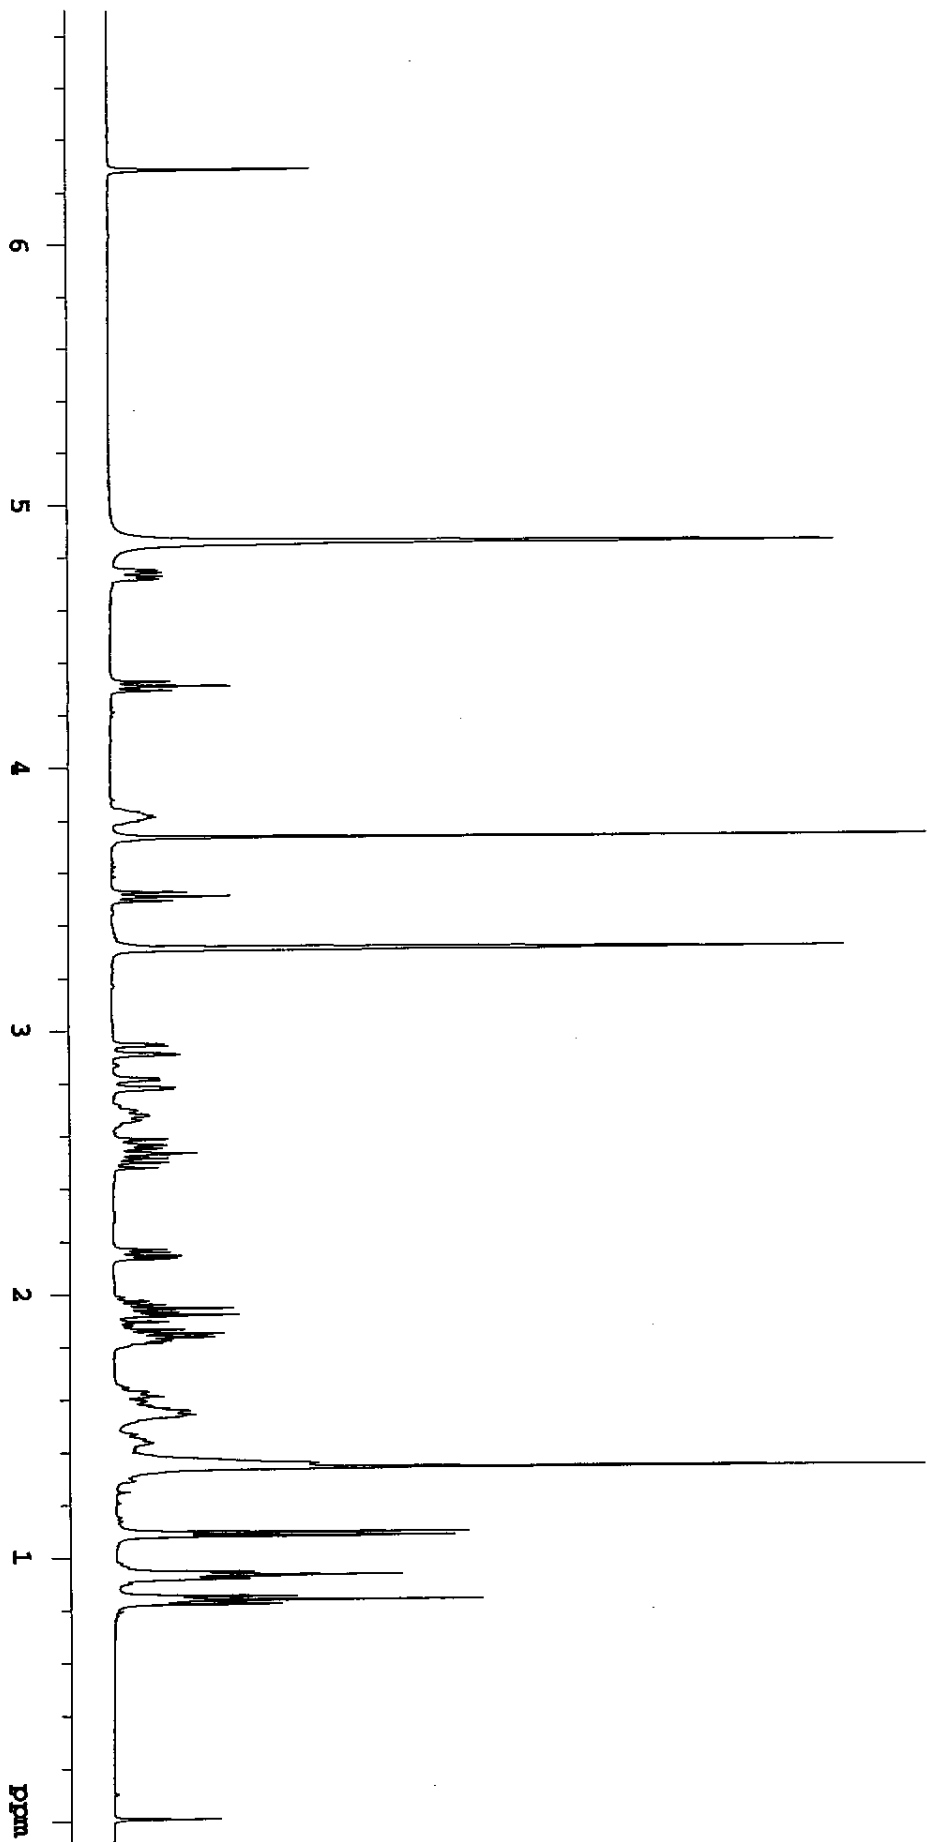

## (-)-Berkelic Acid

Wu, Zhou, and Snider

WXX-11-23-6-CD<sub>3</sub>OD-C

| INDEX | FREQUENCY | PPM     | HEIGHT |
|-------|-----------|---------|--------|
| 1     | 20984.147 | 208.742 | 36.2   |
| 2     | 17576.096 | 174.840 | 32.8   |
| 3     | 17456.315 | 173.649 | 19.0   |
| 4     | 16424.058 | 163.380 | 28.1   |
| 5     | 15387.986 | 153.074 | 29.7   |
| 6     | 14303.849 | 143.289 | 39.0   |
| 7     | 11435.960 | 113.761 | 37.3   |
| 8     | 11132.310 | 110.740 | 49.6   |
| 9     | 10992.692 | 109.351 | 42.1   |
| 10    | 10167.191 | 101.139 | 17.1   |
| 11    | 7695.267  | 76.550  | 38.6   |
| 12    | 7452.653  | 74.136  | 33.7   |
| 13    | 6985.734  | 69.491  | 38.2   |
| 14    | 6135.056  | 61.029  | 54.6   |
| 15    | 5313.371  | 52.855  | 54.4   |
| 16    | 4989.884  | 49.638  | 474.1  |
| 17    | 4975.388  | 49.493  | 18.2   |
| 18    | 4968.522  | 49.425  | 1288.7 |
| 19    | 4947.160  | 49.213  | 2735.5 |
| 20    | 4925.797  | 49.000  | 3350.9 |
| 21    | 4904.435  | 48.787  | 2397.6 |
| 22    | 4882.310  | 48.567  | 1169.6 |
| 23    | 4860.947  | 48.355  | 431.6  |
| 24    | 4282.639  | 42.602  | 47.5   |
| 25    | 4066.727  | 40.454  | 51.2   |
| 26    | 3761.552  | 37.419  | 50.1   |
| 27    | 3561.662  | 35.430  | 45.6   |
| 28    | 3520.463  | 35.020  | 33.1   |
| 29    | 3320.573  | 33.032  | 70.5   |
| 30    | 2898.667  | 28.835  | 46.0   |
| 31    | 2631.638  | 26.179  | 54.7   |
| 32    | 2382.920  | 23.704  | 64.6   |
| 33    | 1887.009  | 18.771  | 50.9   |
| 34    | 1448.319  | 14.407  | 64.3   |
| 35    | 1195.786  | 11.895  | 48.6   |
| 36    | 899.003   | 8.943   | 39.4   |

36 (22-epi-berkelic acid)  
400 MHz (CD<sub>3</sub>OD)

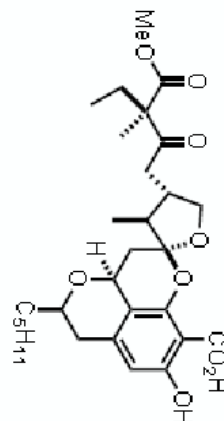

200 180 160 140 120 100 80 60 40 20 ppm

WXX-11-23-6-CD3OD

Pulse Sequence: gpcosy

Solvent: CD3OD

Ambient temperature

INOVA-400 "f1d"

Relax. delay 1.000 sec

Acq. time 0.205 sec

Width 5000.0 Hz

2D Width 5000.0 Hz

Single scan

128 increments

OBSERVE H1, 399.7873871 MHz

DATA PROCESSING

Sq. sine bell 0.102 sec

F1 DATA PROCESSING

Sq. sine bell 0.026 sec

PT size 2048 x 2048

Total time 2 min, 56 sec

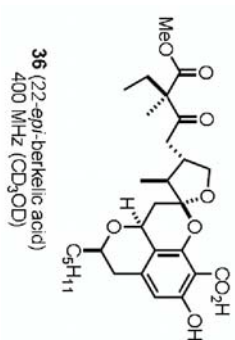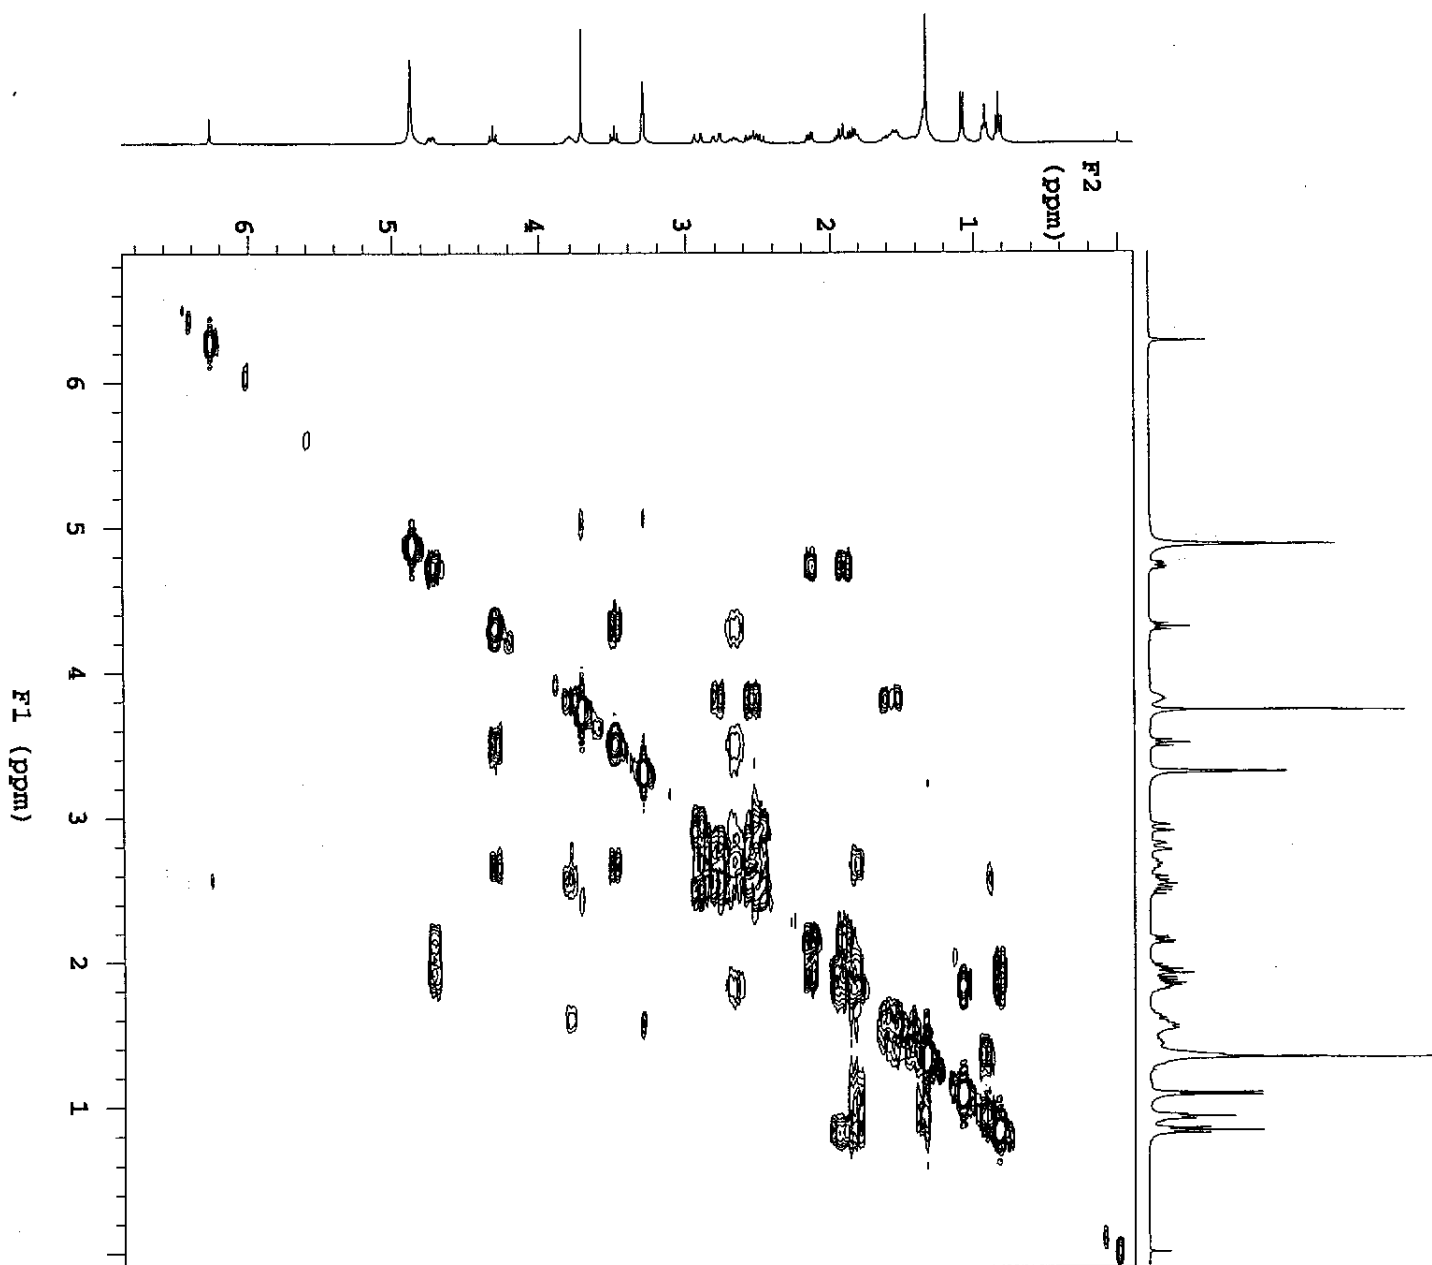

wxc-10-117-2

Pulse Sequence: s2pul

Solvent: CDCl3

Ambient temperature

File: wxc-10-117-2

INOVA-500 "gamb1e"

Pulse 46.1 degrees

Acq. time 1.638 sec

Width 5000.0 Hz

17 repetitions

OBSERVE H1, 399.7857971 MHz

DATA PROCESSING

FT size 16384

Total time 3 min, 31 sec

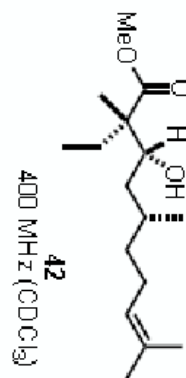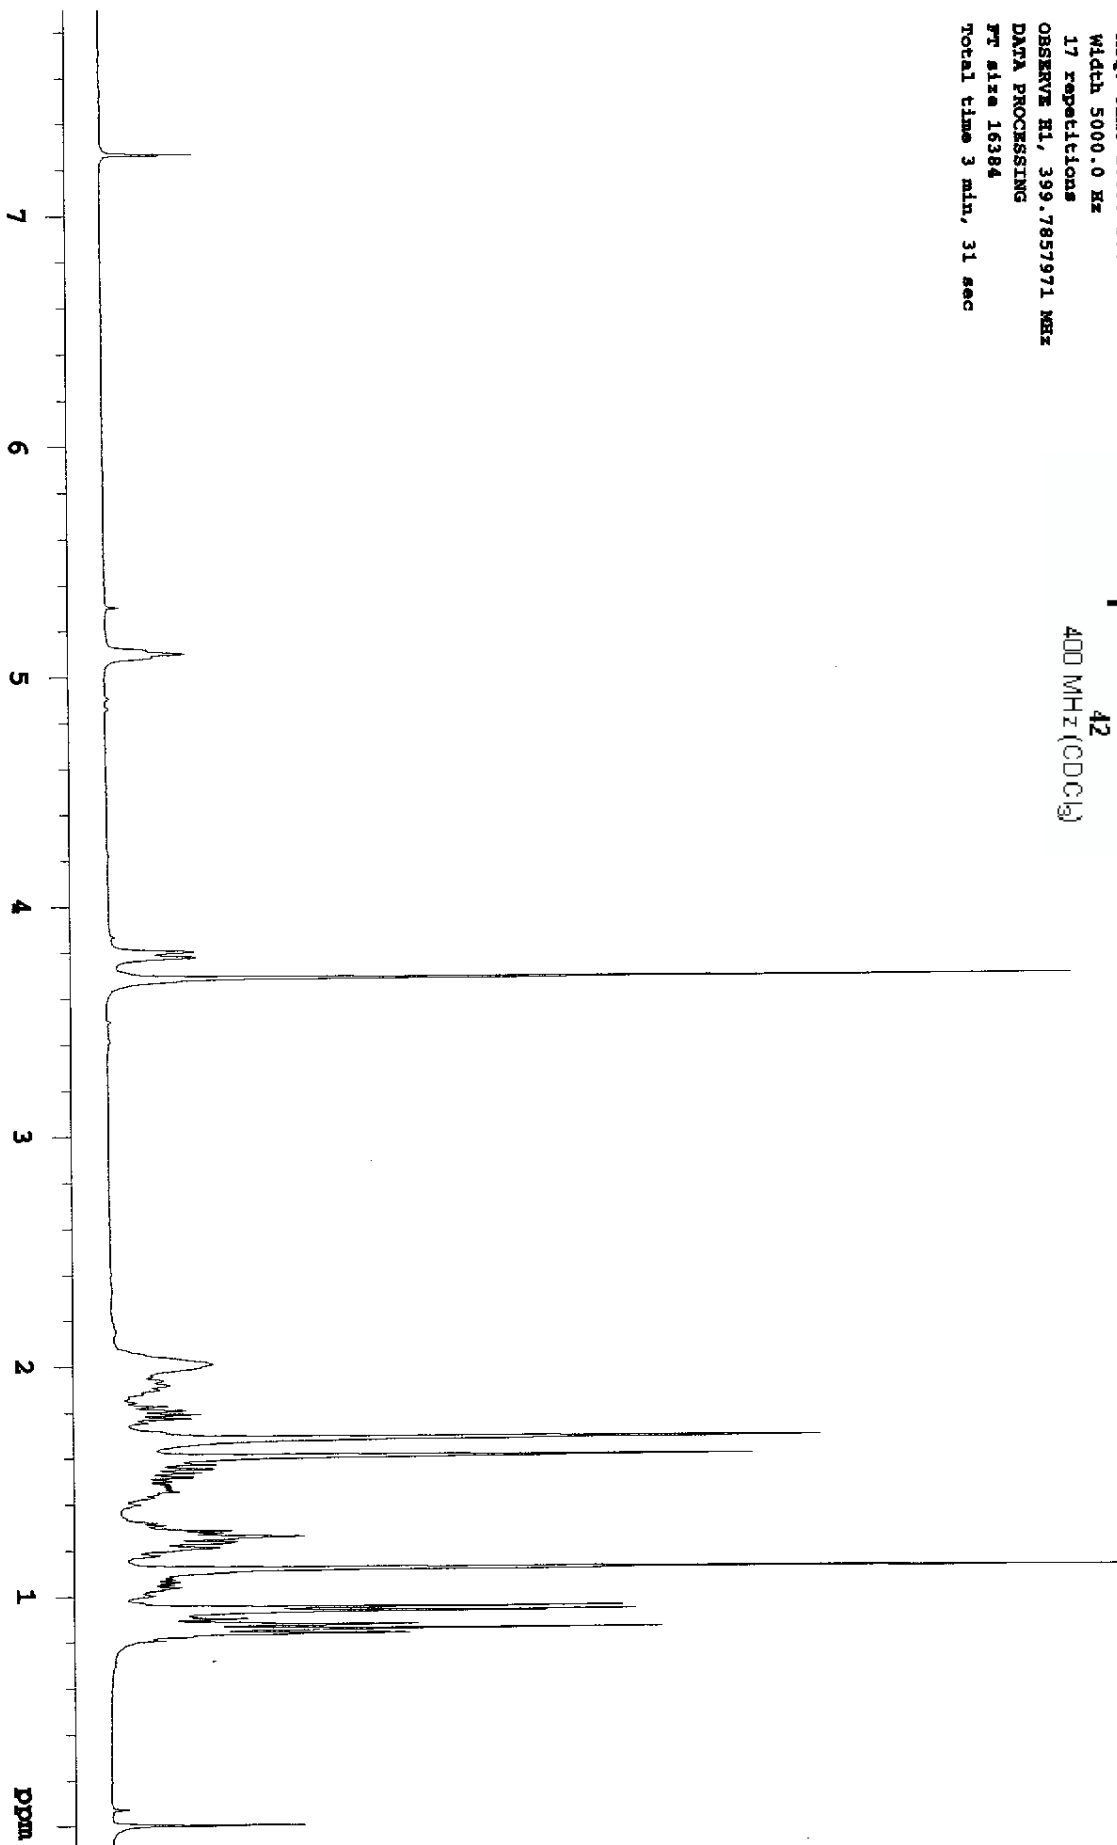

WXX-10-117-2c

| INDEX | FREQUENCY | PPM     | HEIGHT |
|-------|-----------|---------|--------|
| 1     | 17797.895 | 177.047 | 24.1   |
| 2     | 13188.836 | 131.198 | 28.5   |
| 3     | 12543.369 | 124.777 | 48.4   |
| 4     | 7772.563  | 77.319  | 209.5  |
| 5     | 7740.519  | 77.000  | 219.5  |
| 6     | 7708.475  | 76.681  | 215.6  |
| 7     | 7448.304  | 74.093  | 58.3   |
| 8     | 5189.172  | 51.630  | 55.7   |
| 9     | 5170.098  | 51.430  | 40.0   |
| 10    | 4037.098  | 40.160  | 63.3   |
| 11    | 3570.165  | 35.515  | 54.1   |
| 12    | 2975.054  | 29.595  | 52.3   |
| 13    | 2872.054  | 28.570  | 54.2   |
| 14    | 2585.180  | 25.716  | 54.2   |
| 15    | 2535.587  | 25.223  | 60.3   |
| 16    | 2086.965  | 20.760  | 60.1   |
| 17    | 1774.151  | 17.649  | 39.9   |
| 18    | 1629.951  | 16.214  | 53.3   |
| 19    | 906.652   | 9.019   | 42.1   |

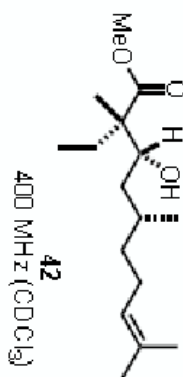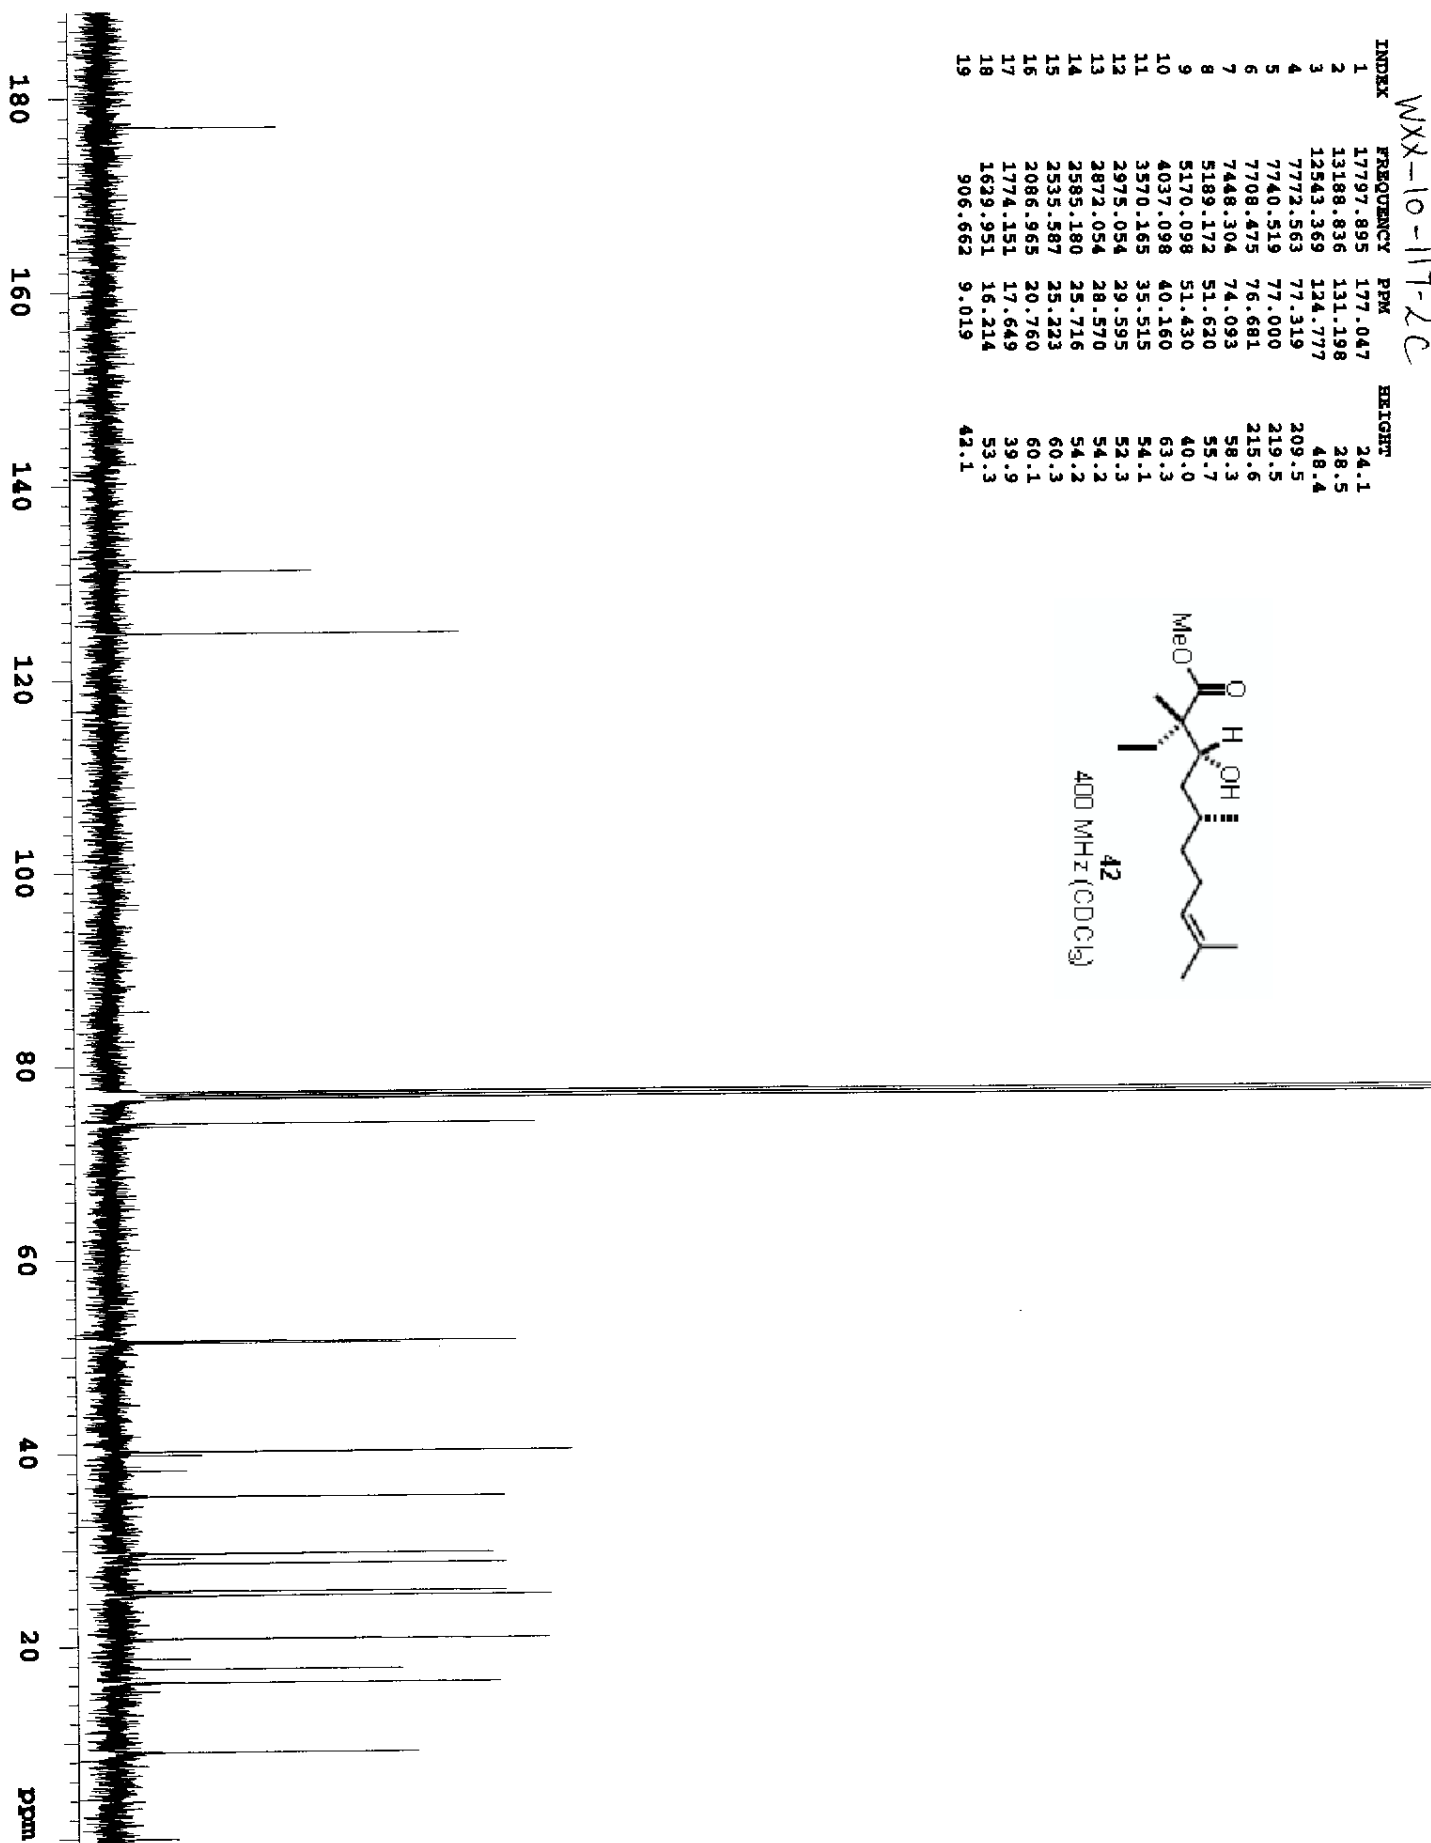



WZK-10-117-2

Pulse Sequence: gCOSY  
 Solvent: CDCl<sub>3</sub>  
 Ambient temperature  
 INOVA-400 "F1D"

Relax. delay 1.000 sec  
 Acq. time 0.205 sec  
 Width 5000.0 Hz  
 2D Width 5000.0 Hz  
 Single scan  
 128 increments  
 OBSERVE H1, 399.7858068 MHz  
 DATA PROCESSING  
 Sd. sine bell 0.102 sec  
 F1 DATA PROCESSING  
 Sd. sine bell 0.026 sec  
 PR size 2048 x 2048  
 Total time 2 min, 56 sec

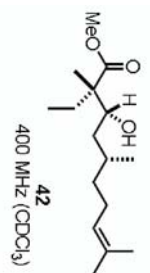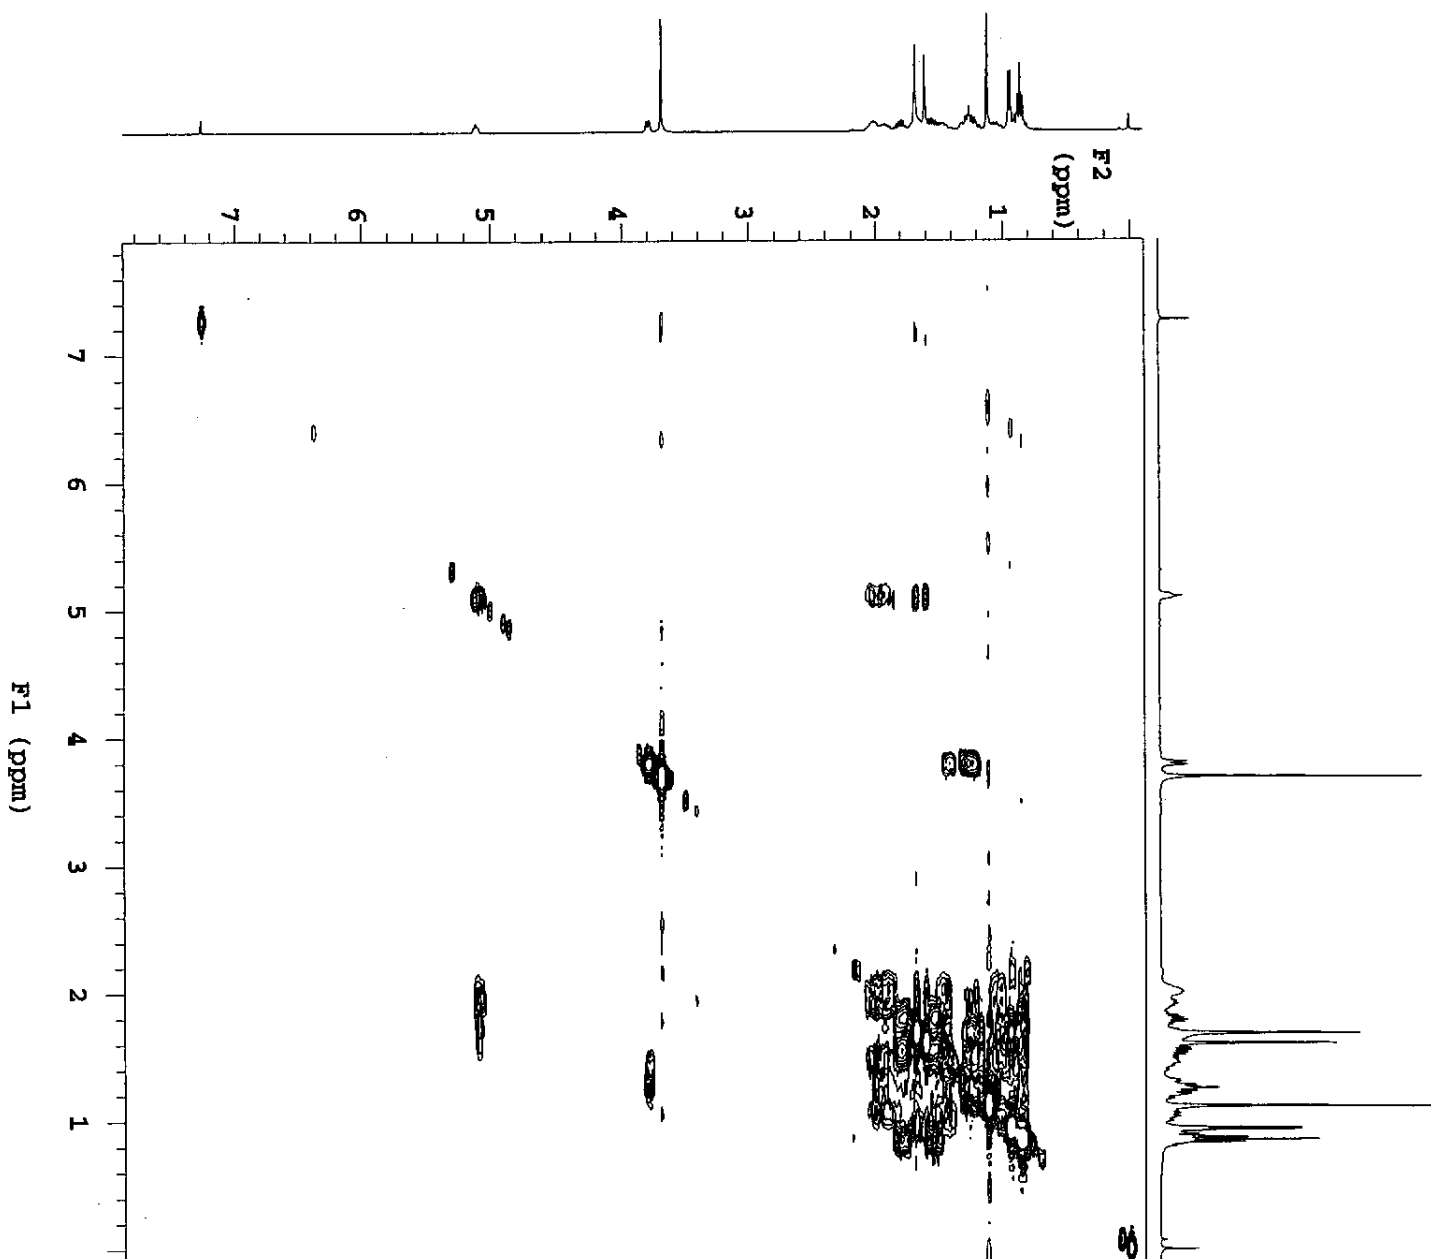

wkcr-10-129-6

Pulse Sequence: zgpg30

Solvent: CDCl3

Ambient temperature

File: wkcr-10-129-6

INOVA-500 "gamb1e"

Pulse 46.1 degrees

Acq. time 1.638 sec

Width 5000.0 Hz

22 repetitions

OBSERVE H1, 399.7857971 MHz

DATA PROCESSING

F2 size 16384

Total time 3 min, 31 sec

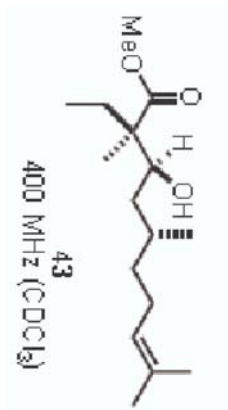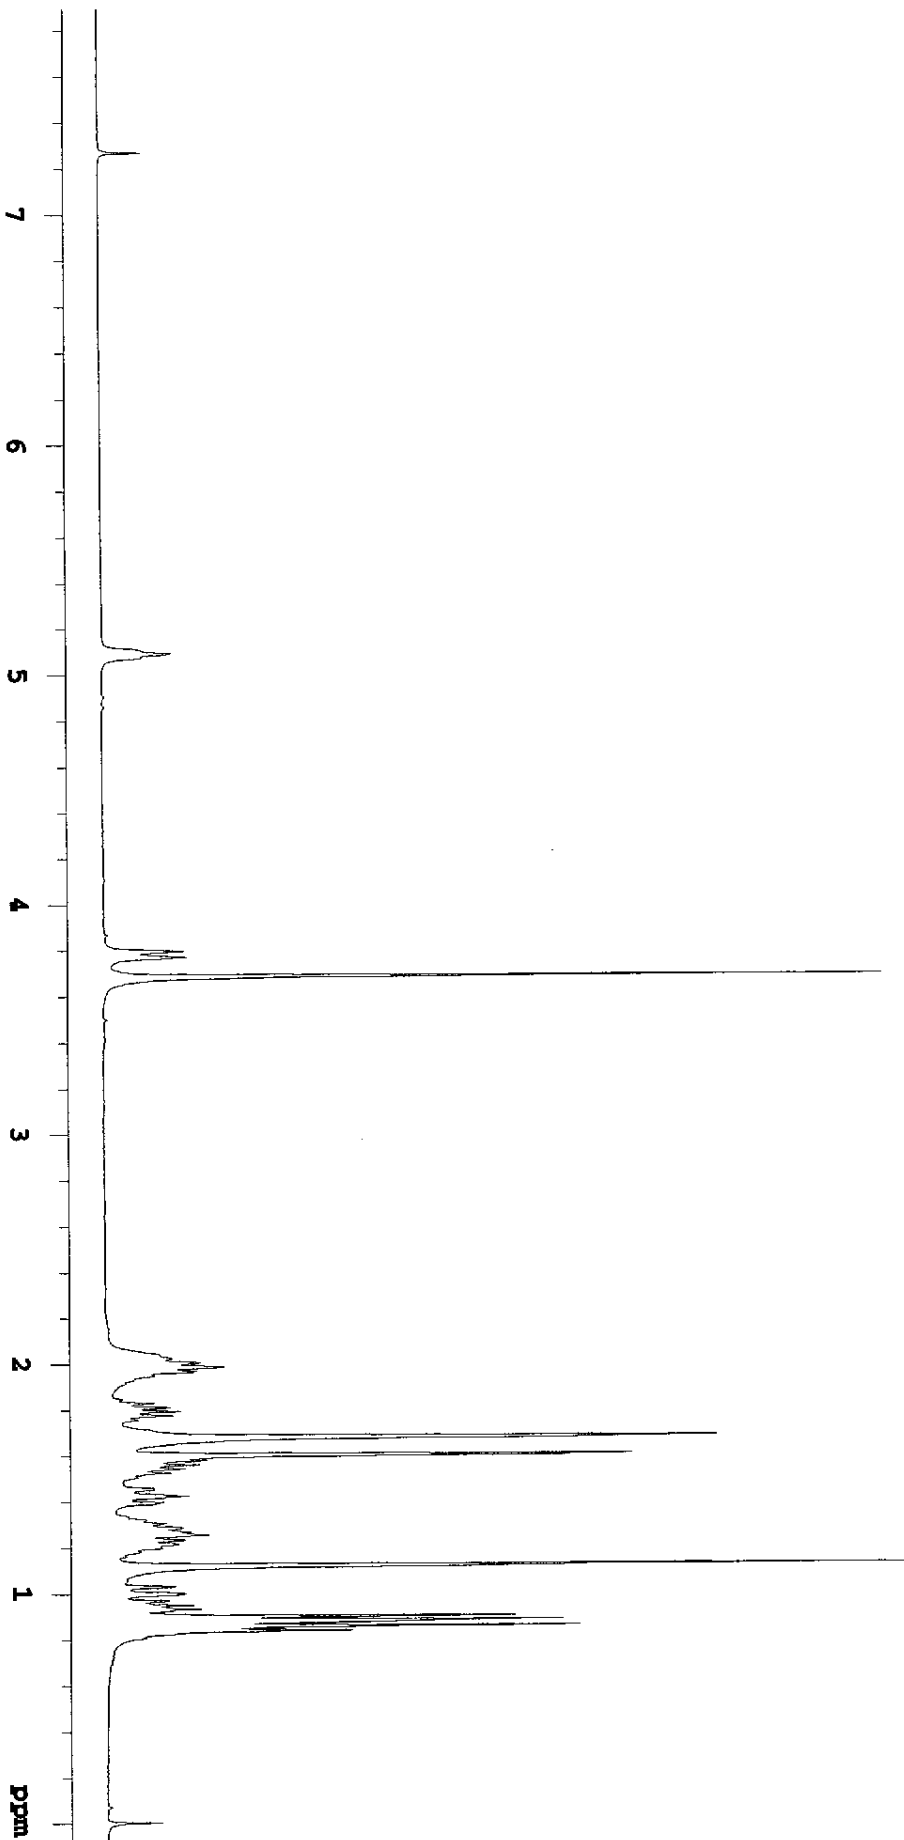

MSX-10-129-6C

| INDEX | FREQUENCY | PPM     | HEIGHT |
|-------|-----------|---------|--------|
| 1     | 1779.876  | 177.067 | 18.6   |
| 2     | 13184.092 | 131.151 | 23.0   |
| 3     | 12535.594 | 124.700 | 45.6   |
| 4     | 7771.800  | 77.311  | 72.0   |
| 5     | 7740.519  | 77.000  | 75.8   |
| 6     | 7708.476  | 76.681  | 76.8   |
| 7     | 7411.692  | 73.729  | 58.6   |
| 8     | 5186.961  | 51.598  | 55.9   |
| 9     | 5162.547  | 51.355  | 27.6   |
| 10    | 4002.879  | 39.819  | 55.3   |
| 11    | 3838.847  | 38.188  | 53.8   |
| 12    | 2925.608  | 29.103  | 53.7   |
| 13    | 2870.677  | 28.556  | 55.4   |
| 14    | 2583.049  | 25.695  | 59.7   |
| 15    | 2564.738  | 25.513  | 58.7   |
| 16    | 1878.092  | 18.683  | 59.2   |
| 17    | 1772.807  | 17.635  | 35.3   |
| 18    | 1633.952  | 16.254  | 64.7   |
| 19    | 901.530   | 8.968   | 46.5   |

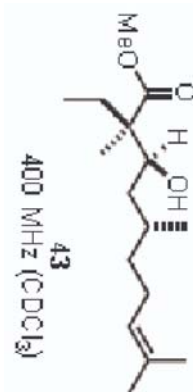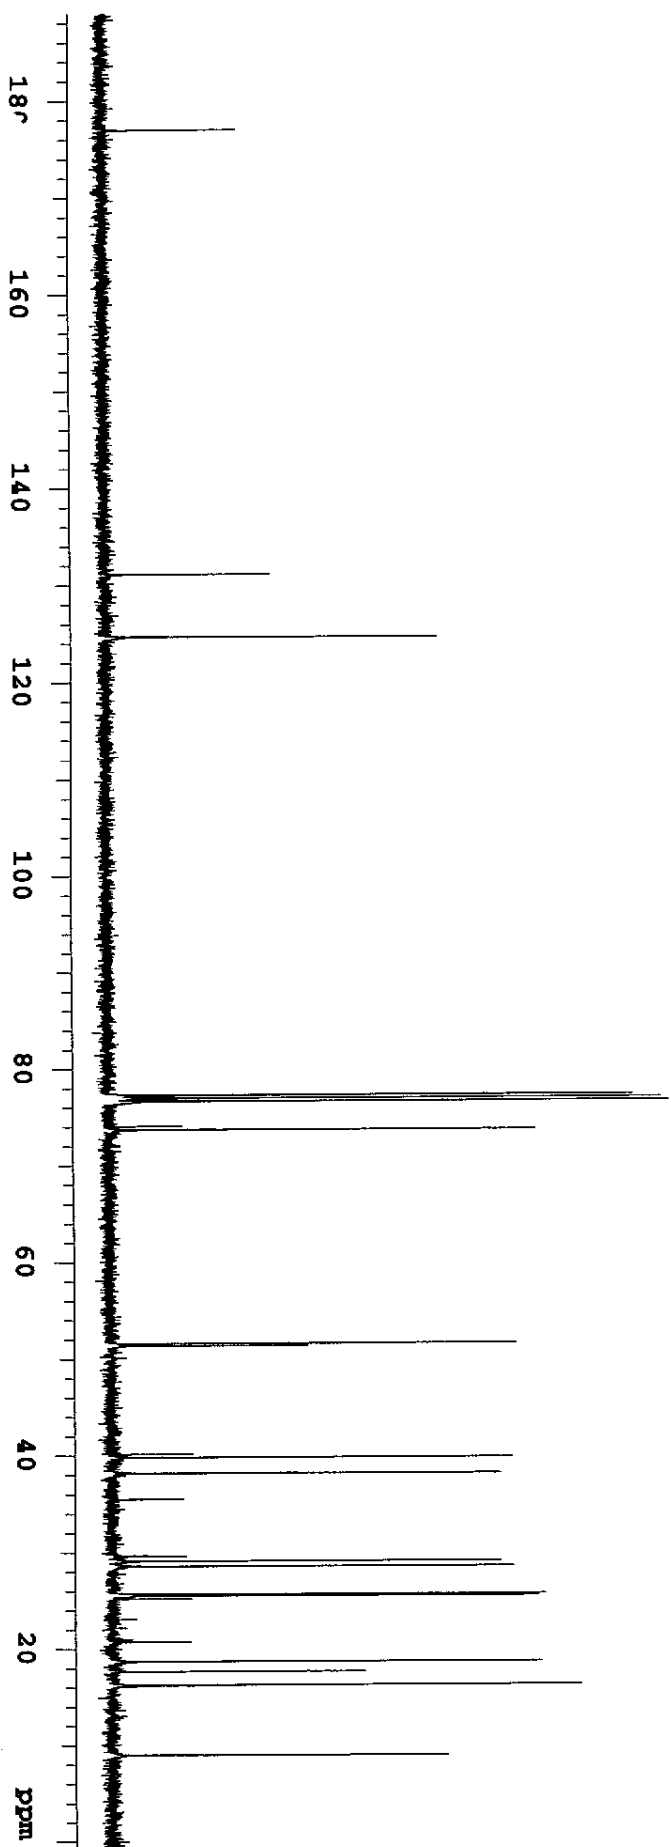

WRR-10-129-6

Pulse Sequence: gCOSY

Solvent: CDCl3

Ambient temperature

INOVA-400 "fid"

Relax. delay 1.000 sec

Acq. time 0.205 sec

Width 5000.0 Hz

2D Width 5000.0 Hz

Single scan

128 increments

OBSERVE H1, 399.7858056 MHz

DATA PROCESSING

Sq. sine bell 0.102 sec

F1 DATA PROCESSING

Sq. sine bell 0.026 sec

F2 size 2048 x 2048

Total time 2 min, 56 sec

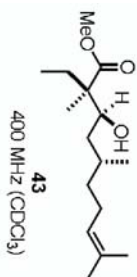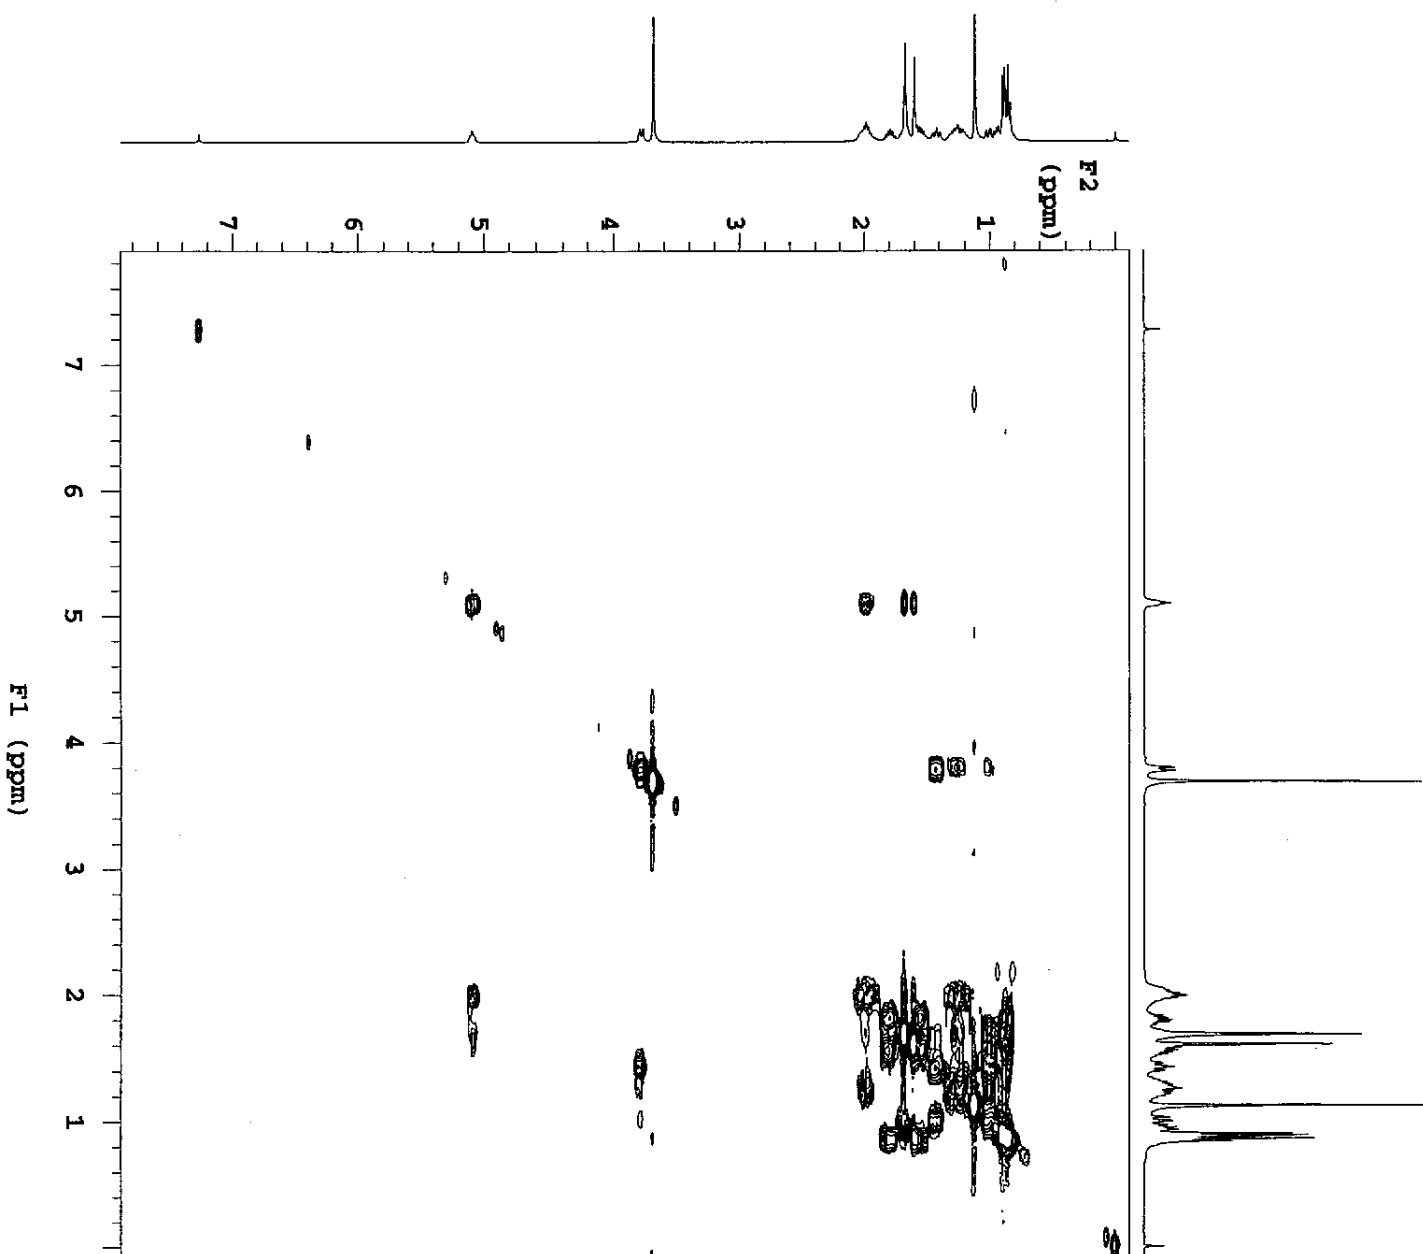

WXX-10-117-3

Pulse Sequence: s2pul1

Solvent: CDCl3

Ambient temperature

File: WXX-10-117-3

INOVA-500 "gambler"

Pulse 46.1 degrees

Acq. time 1.638 sec

Width 5000.0 Hz

15 repetitions

OBSERVE H1, 399.7857971 MHz

DATA PROCESSING

F1 size 16384

Total time 3 min, 31 sec

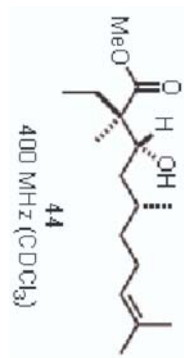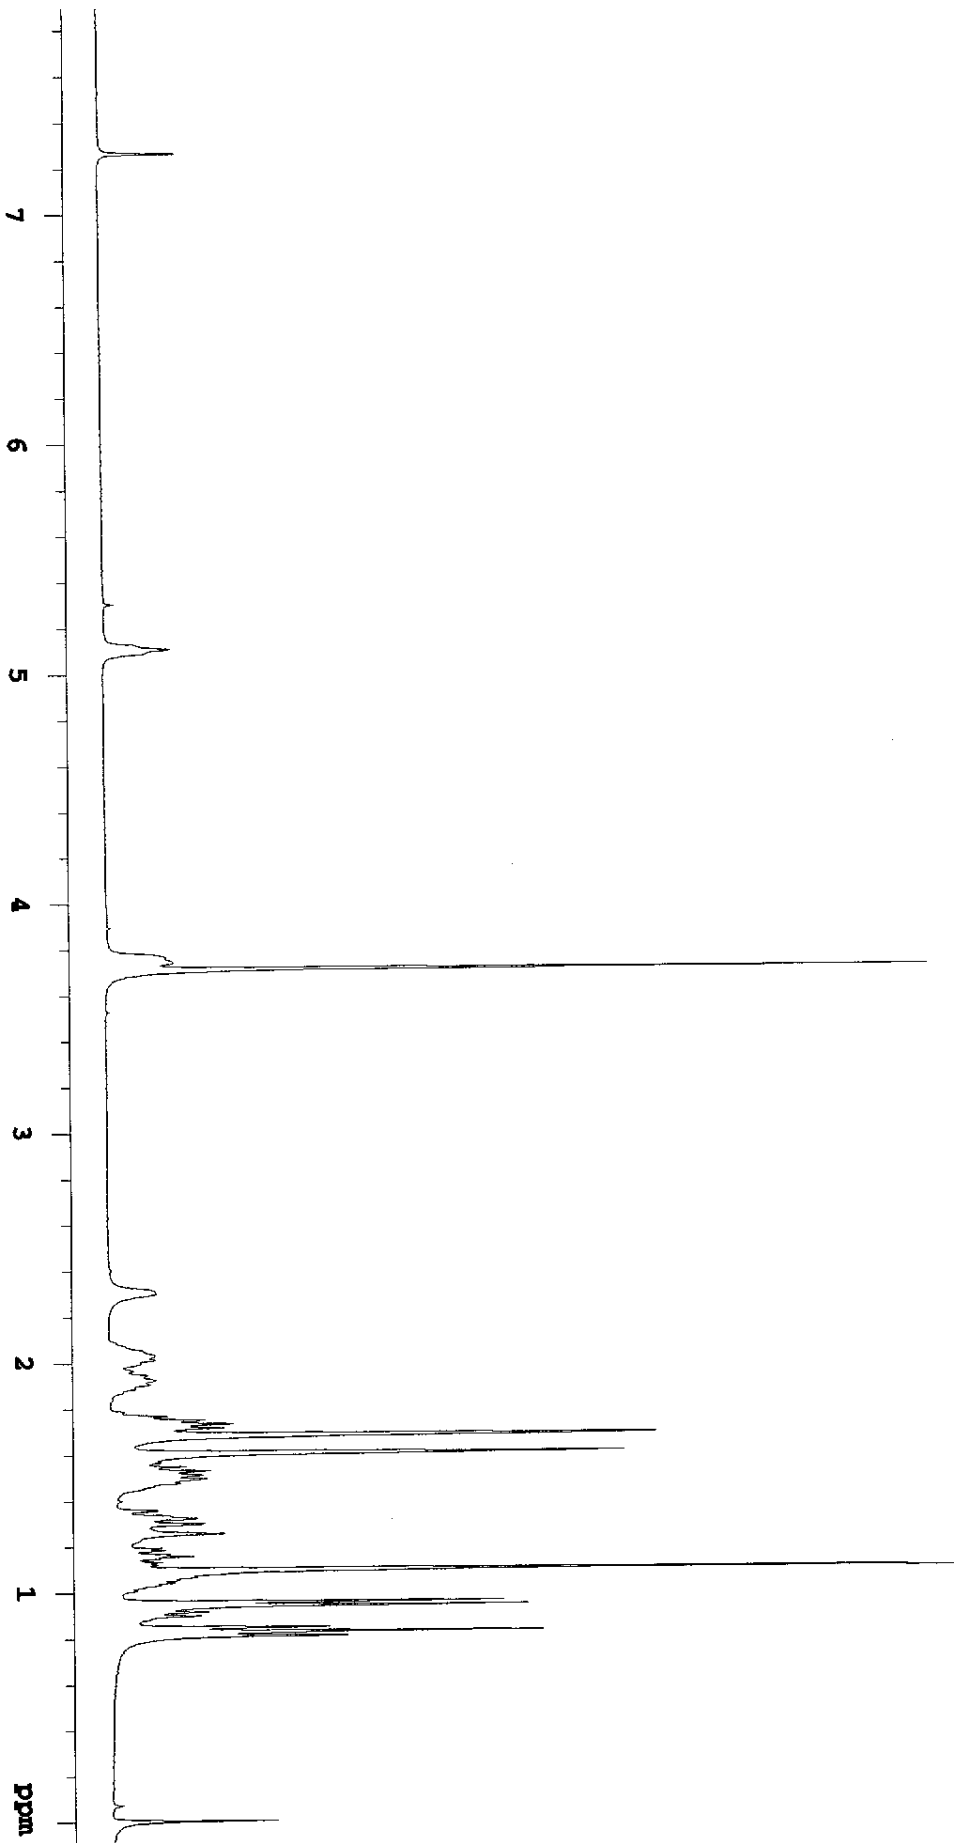

WXX-10-117-3C

| INDEX | FREQUENCY | PPM     | HEIGHT |
|-------|-----------|---------|--------|
| 1     | 17965.035 | 177.715 | 22.8   |
| 2     | 13188.073 | 131.190 | 20.6   |
| 3     | 12544.133 | 124.785 | 42.5   |
| 4     | 7771.801  | 77.311  | 195.2  |
| 5     | 7740.519  | 77.000  | 206.6  |
| 6     | 7708.475  | 76.681  | 210.2  |
| 7     | 7385.742  | 73.471  | 53.5   |
| 8     | 5199.853  | 51.726  | 44.0   |
| 9     | 5188.409  | 51.612  | 25.3   |
| 10    | 3944.017  | 39.234  | 57.5   |
| 11    | 3580.083  | 35.613  | 50.2   |
| 12    | 2965.135  | 29.496  | 52.4   |
| 13    | 2956.743  | 29.413  | 52.1   |
| 14    | 2585.180  | 25.716  | 55.2   |
| 15    | 2545.506  | 25.332  | 51.1   |
| 16    | 2093.069  | 20.821  | 56.9   |
| 17    | 1774.151  | 17.649  | 34.0   |
| 18    | 1661.995  | 16.533  | 53.5   |
| 19    | 891.403   | 8.867   | 39.9   |

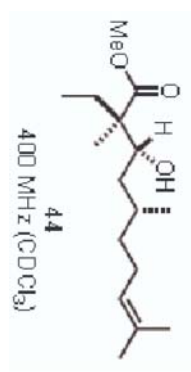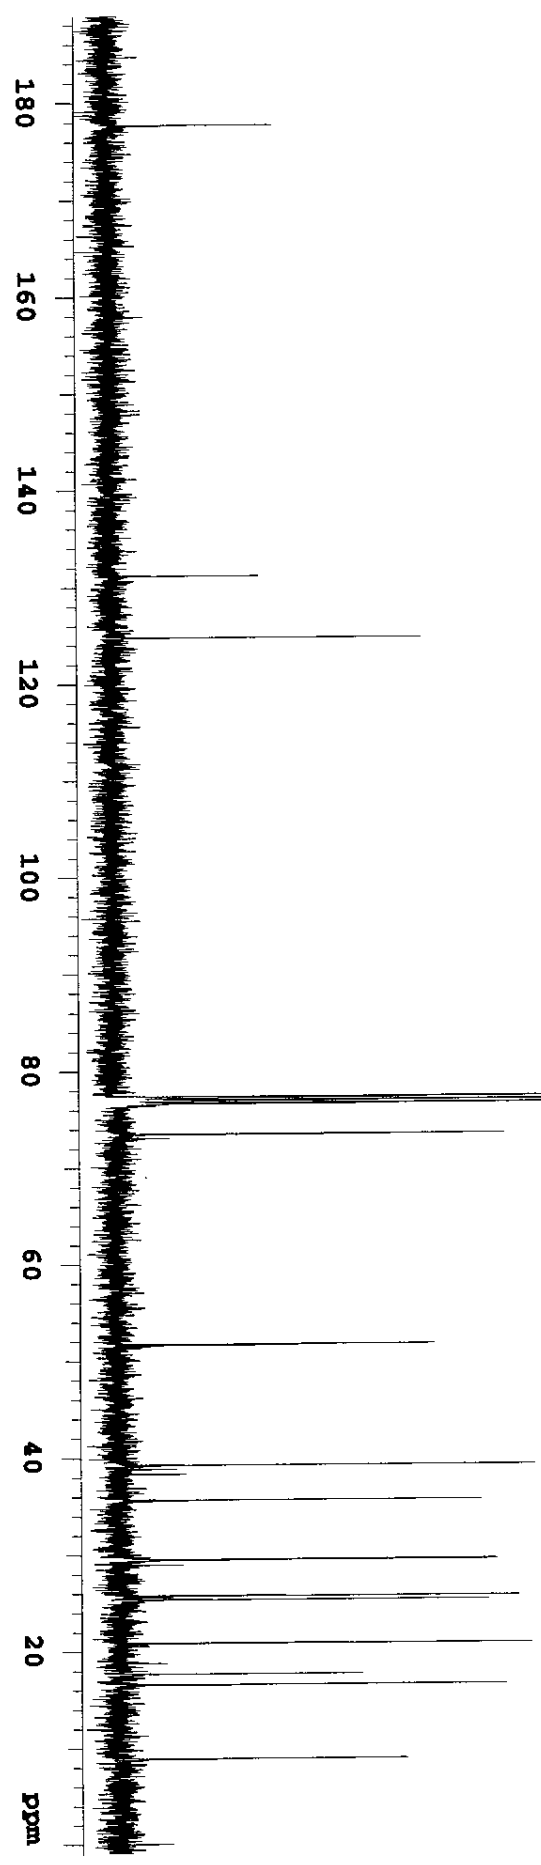

WXR-10-117-3

Pulse Sequence: gCOSY

Solvent: CDCl<sub>3</sub>

Ambient temperature

INNOVA-400 "F1d"

Relax. delay 1.000 sec

Acq. time 0.205 sec

Width 5000.0 Hz

2D Width 5000.0 Hz

Single scan

128 increments

OBSERVE H1, 399.7858074 MHz

DATA PROCESSING

Sd. sine bell 0.102 sec

F1 DATA PROCESSING

Sd. sine bell 0.026 sec

FT size 2048 x 2048

Total time 2 min, 56 sec

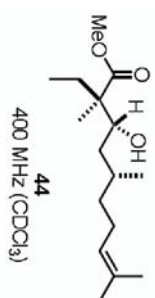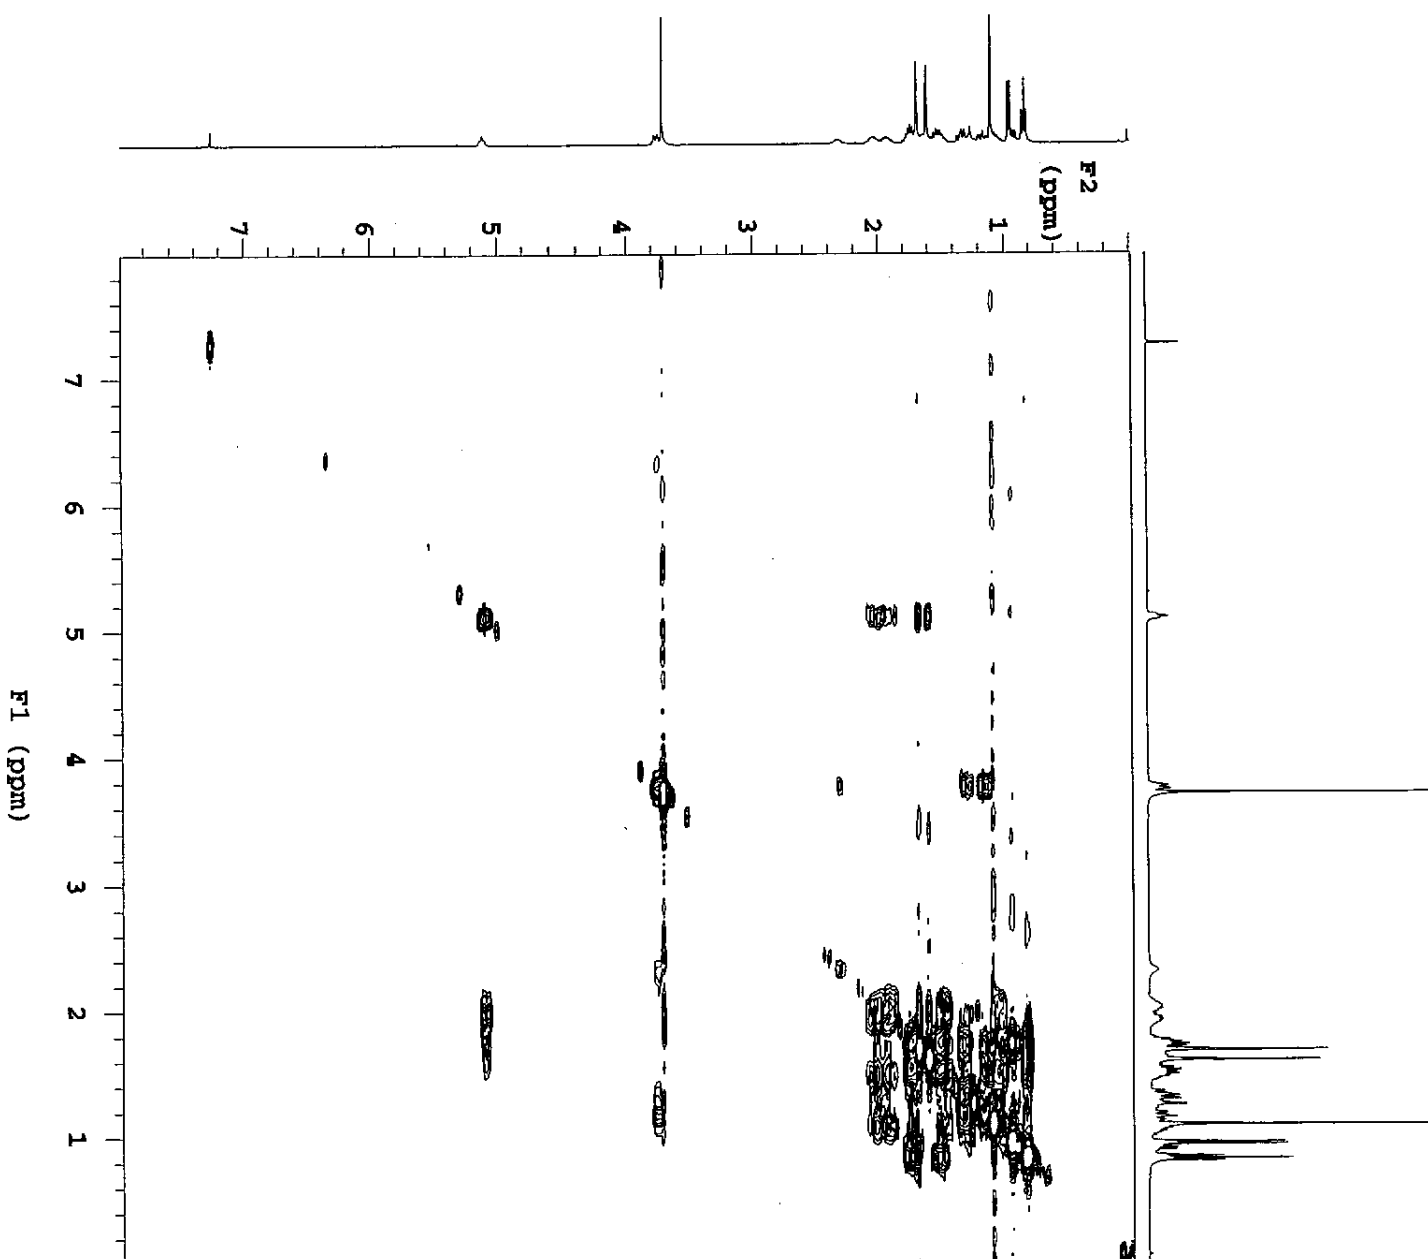

wkx-10-129-7

Pulse Sequence: s2pul

Solvent: CDCl3

Ambient temperature

File: wkx-10-129-7

INOVA-500 "gambler"

Pulse 46.1 degrees

Acq. time 1.538 sec

Width 5000.0 Hz

16 repetitions

OBSERVE F1, 399.7857971 MHz

DATA PROCESSING

FT size 15384

Total time 3 min, 31 sec

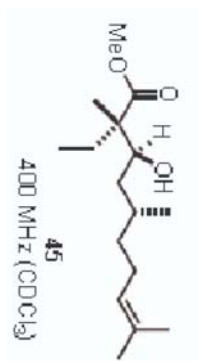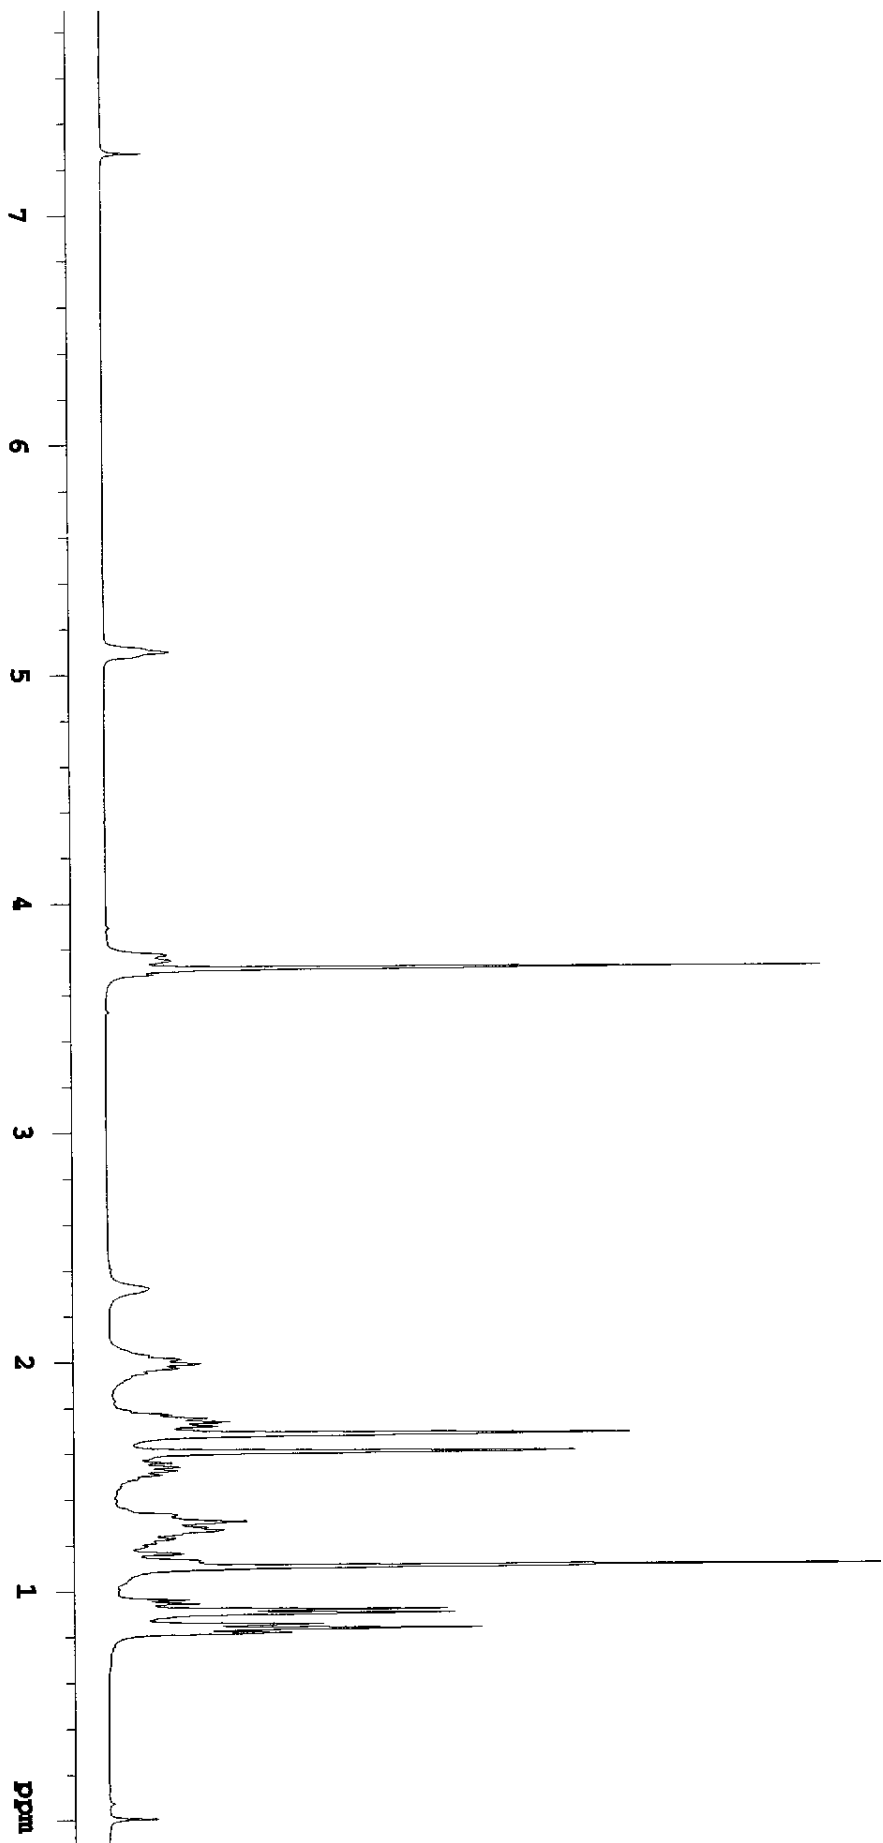



WXY-10-129-7c

| INDEX | FREQUENCY | PPM     | HEIGHT |
|-------|-----------|---------|--------|
| 1     | 1767.778  | 177.742 | 18.3   |
| 2     | 13182.566 | 131.136 | 21.0   |
| 3     | 12537.883 | 124.723 | 51.9   |
| 4     | 7772.563  | 77.319  | 90.1   |
| 5     | 7740.519  | 77.000  | 93.4   |
| 6     | 7708.476  | 76.681  | 91.7   |
| 7     | 7343.791  | 73.053  | 58.6   |
| 8     | 5197.642  | 51.704  | 56.1   |
| 9     | 5176.280  | 51.492  | 39.1   |
| 10    | 3900.645  | 38.802  | 66.3   |
| 11    | 3848.765  | 38.286  | 60.8   |
| 12    | 2956.889  | 29.414  | 63.3   |
| 13    | 2907.298  | 28.921  | 55.7   |
| 14    | 2583.811  | 25.703  | 67.5   |
| 15    | 2567.027  | 25.536  | 63.3   |
| 16    | 1884.959  | 18.751  | 62.4   |
| 17    | 1772.807  | 17.635  | 36.4   |
| 18    | 1666.758  | 16.580  | 63.4   |
| 19    | 887.034   | 8.824   | 48.2   |

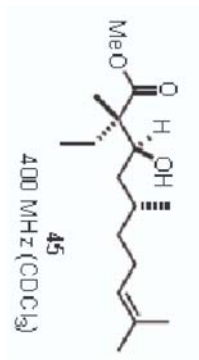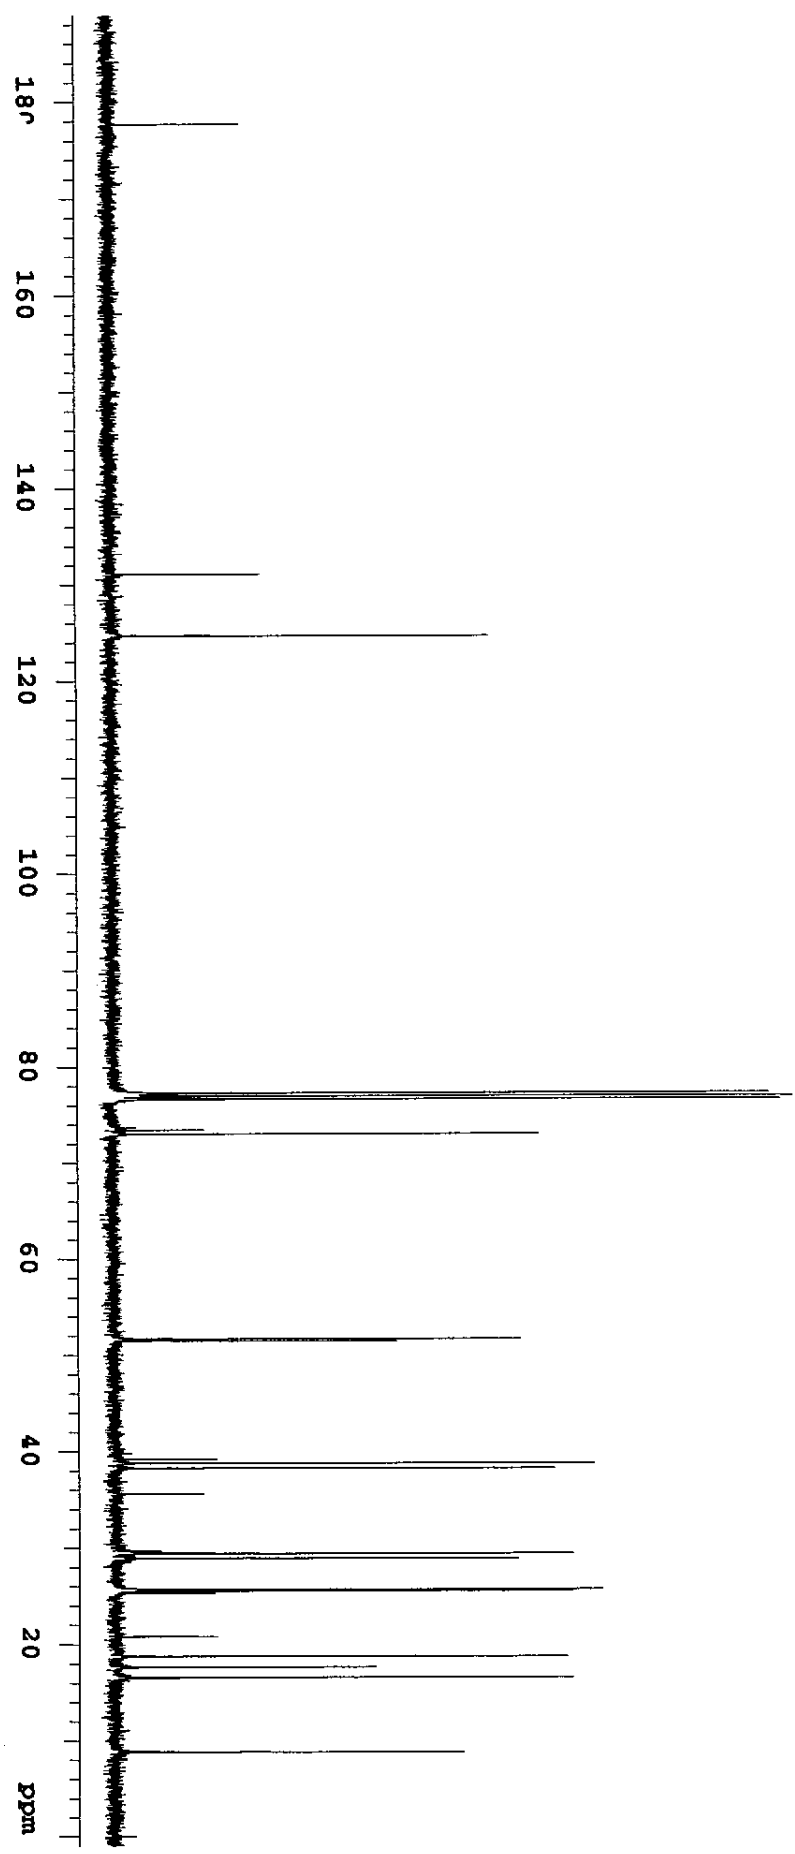

WXX-10-129-7

Pulse Sequence: gCOSY  
Solvent: CDCl3  
Ambient temperature  
INOVA-400 "F1d"

Relax. delay 1.000 sec  
Acq. time 0.205 sec  
Width 5000.0 Hz  
2D Width 5000.0 Hz  
Single scan  
128 increments  
OBSERVE H1, 399.7858056 MHz  
DATA PROCESSING  
Sq. sine bell 0.102 sec  
F1 DATA PROCESSING  
Sq. sine bell 0.026 sec  
FT size 2048 x 2048  
Total time 2 min, 56 sec

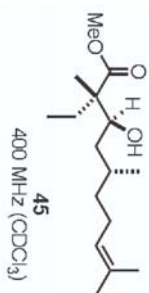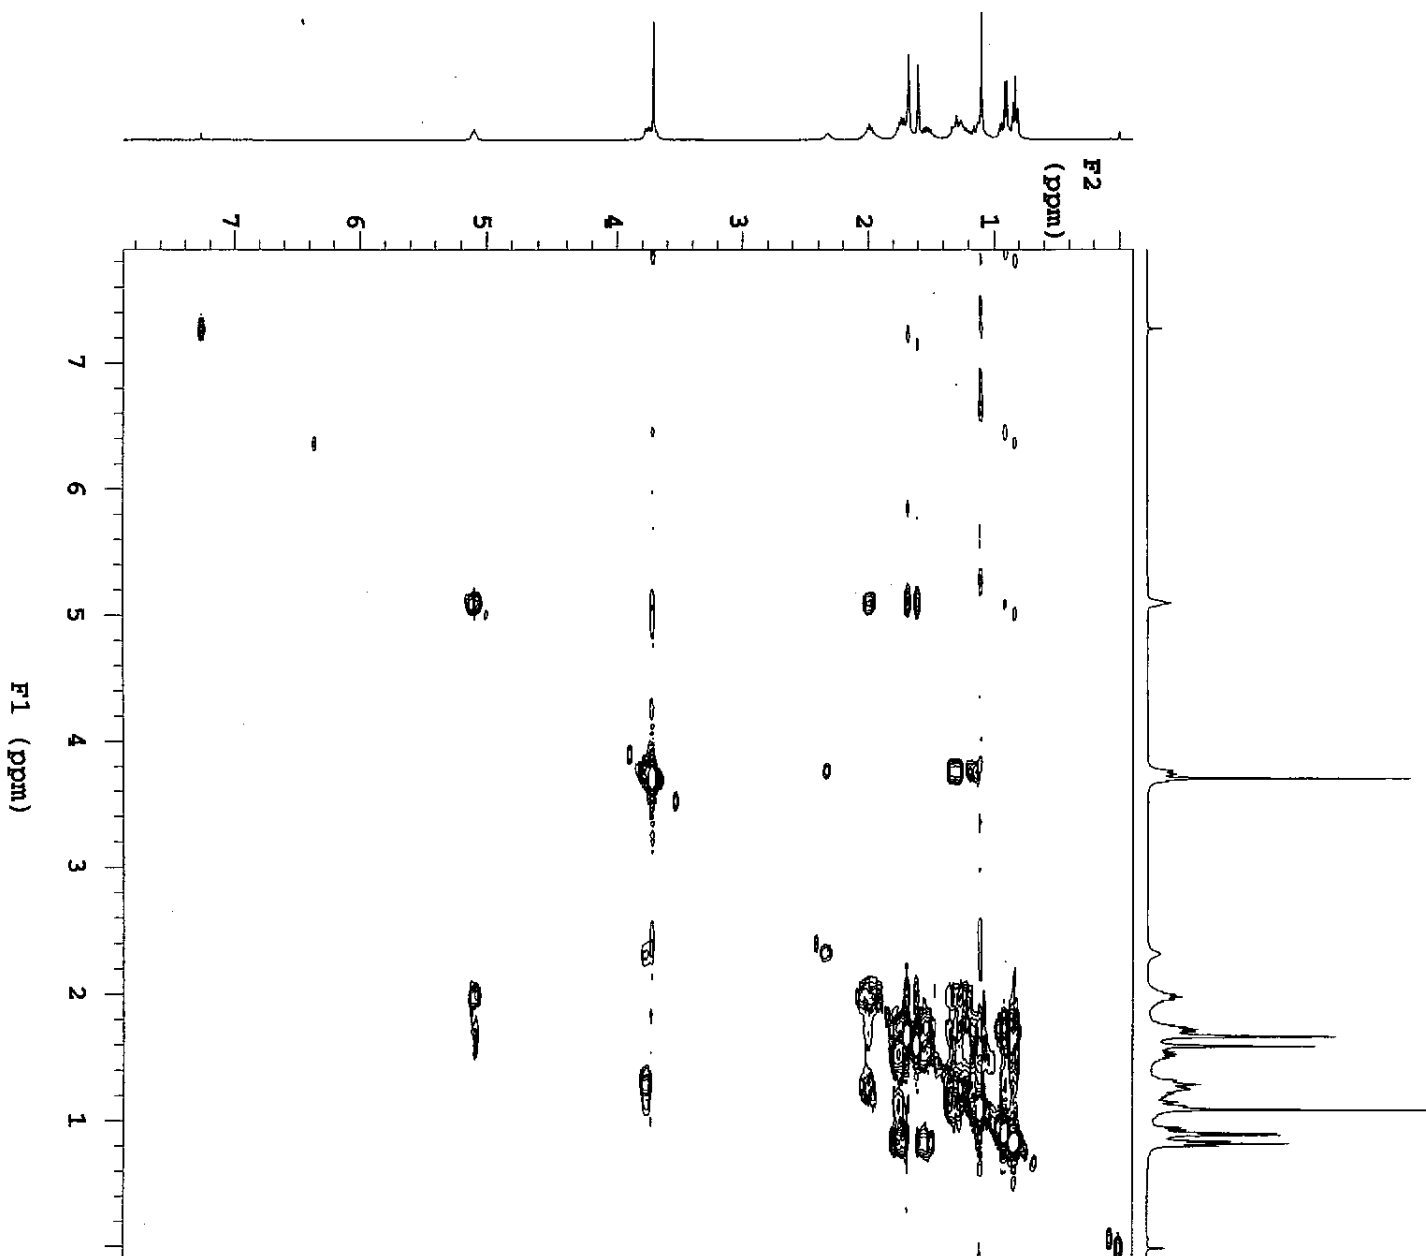

wxc-11-35-4

Pulse Sequence: zgpg30

Solvent: CDCl3

Ambient temperature

File: wxc-11-35-4

INOVA-500 "gambler"

Pulse 46.1 degrees

Acq. time 1.638 sec

Width 5000.0 Hz

20 repetitions

OBSERVE RL, 399.7857971 MHz

DATA PROCESSING

FW size 16384

Total time 3 min, 31 sec

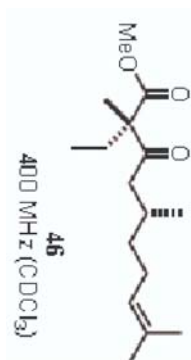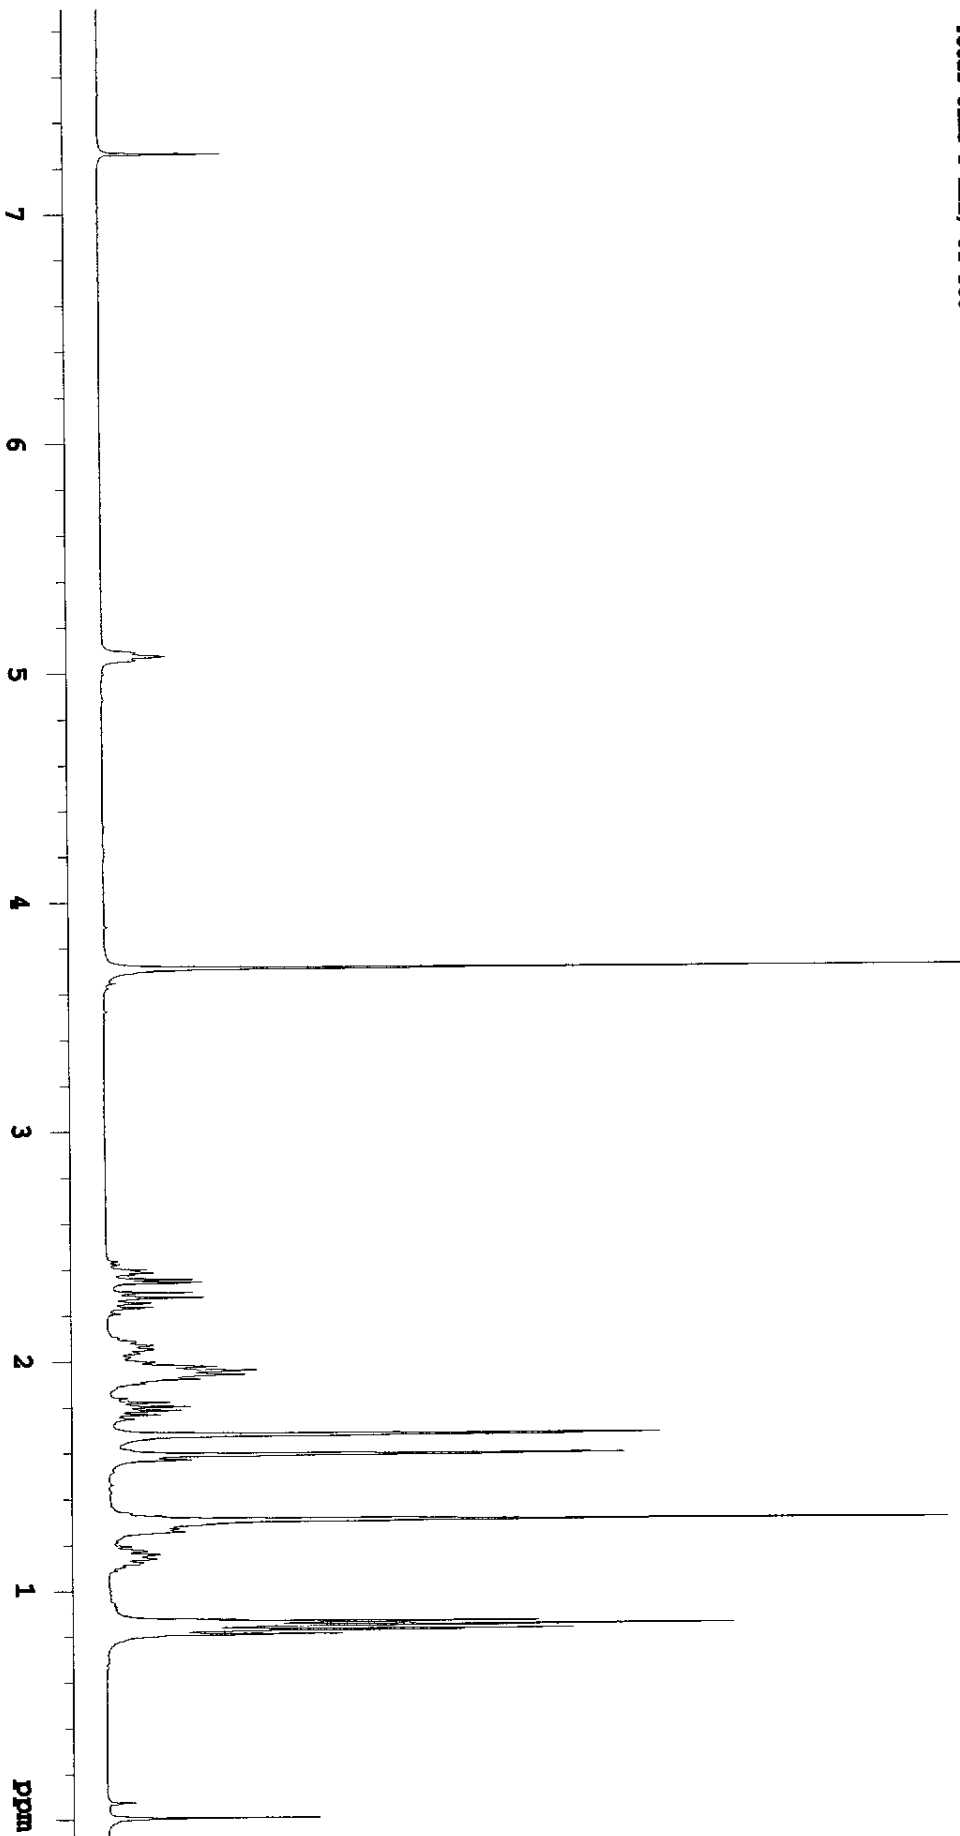

WX-11-35-KC

| INDEX | FREQUENCY | PPM     | HEIGHT |
|-------|-----------|---------|--------|
| 1     | 20831.797 | 207.227 | 14.7   |
| 2     | 17455.027 | 173.637 | 11.2   |
| 3     | 13212.321 | 131.432 | 23.8   |
| 4     | 12497.447 | 124.320 | 52.4   |
| 5     | 7772.563  | 77.319  | 135.8  |
| 6     | 7740.519  | 77.000  | 145.0  |
| 7     | 7708.476  | 76.681  | 147.8  |
| 8     | 6046.794  | 60.151  | 31.9   |
| 9     | 5244.181  | 52.167  | 51.0   |
| 10    | 4583.476  | 45.595  | 75.9   |
| 11    | 3693.888  | 36.746  | 64.8   |
| 12    | 2832.530  | 28.177  | 62.2   |
| 13    | 2775.309  | 27.608  | 70.3   |
| 14    | 2582.286  | 25.688  | 63.4   |
| 15    | 2562.449  | 25.490  | 73.5   |
| 16    | 1965.068  | 19.548  | 65.4   |
| 17    | 1825.450  | 18.159  | 19.4   |
| 18    | 1820.872  | 18.113  | 66.9   |
| 19    | 1772.044  | 17.628  | 40.8   |
| 20    | 862.620   | 8.581   | 47.5   |

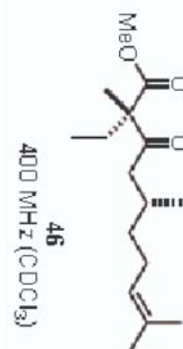

200 180 160 140 120 100 80 60 40 20 ppm

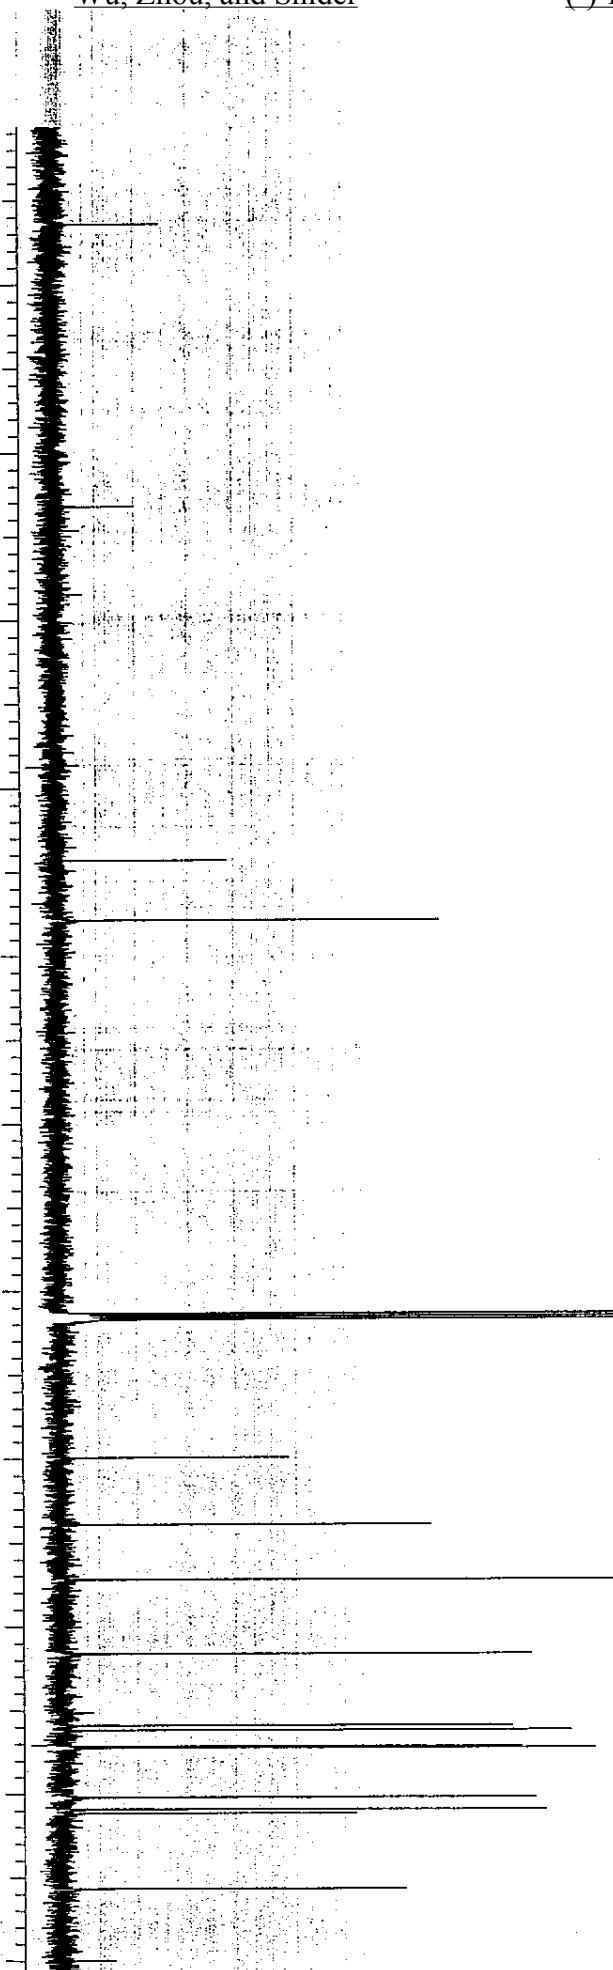

wkx-11-35-2

Pulse Sequence: zgpg30

Solvent: CDCl3

Ambient temperature

File: wkx-11-35-2

INOVA-500 "gamb1a"

Pulse 46.1 degrees

Acq. time 1.638 sec

Width 5000.0 Hz

23 repetitions

OBSERVE HL, 399.7857971 MHz

DATA PROCESSING

FT size 16384

Total time 3 min, 31 sec

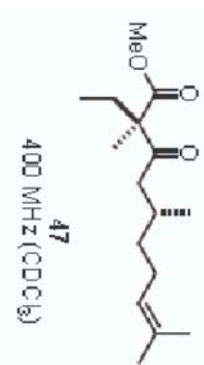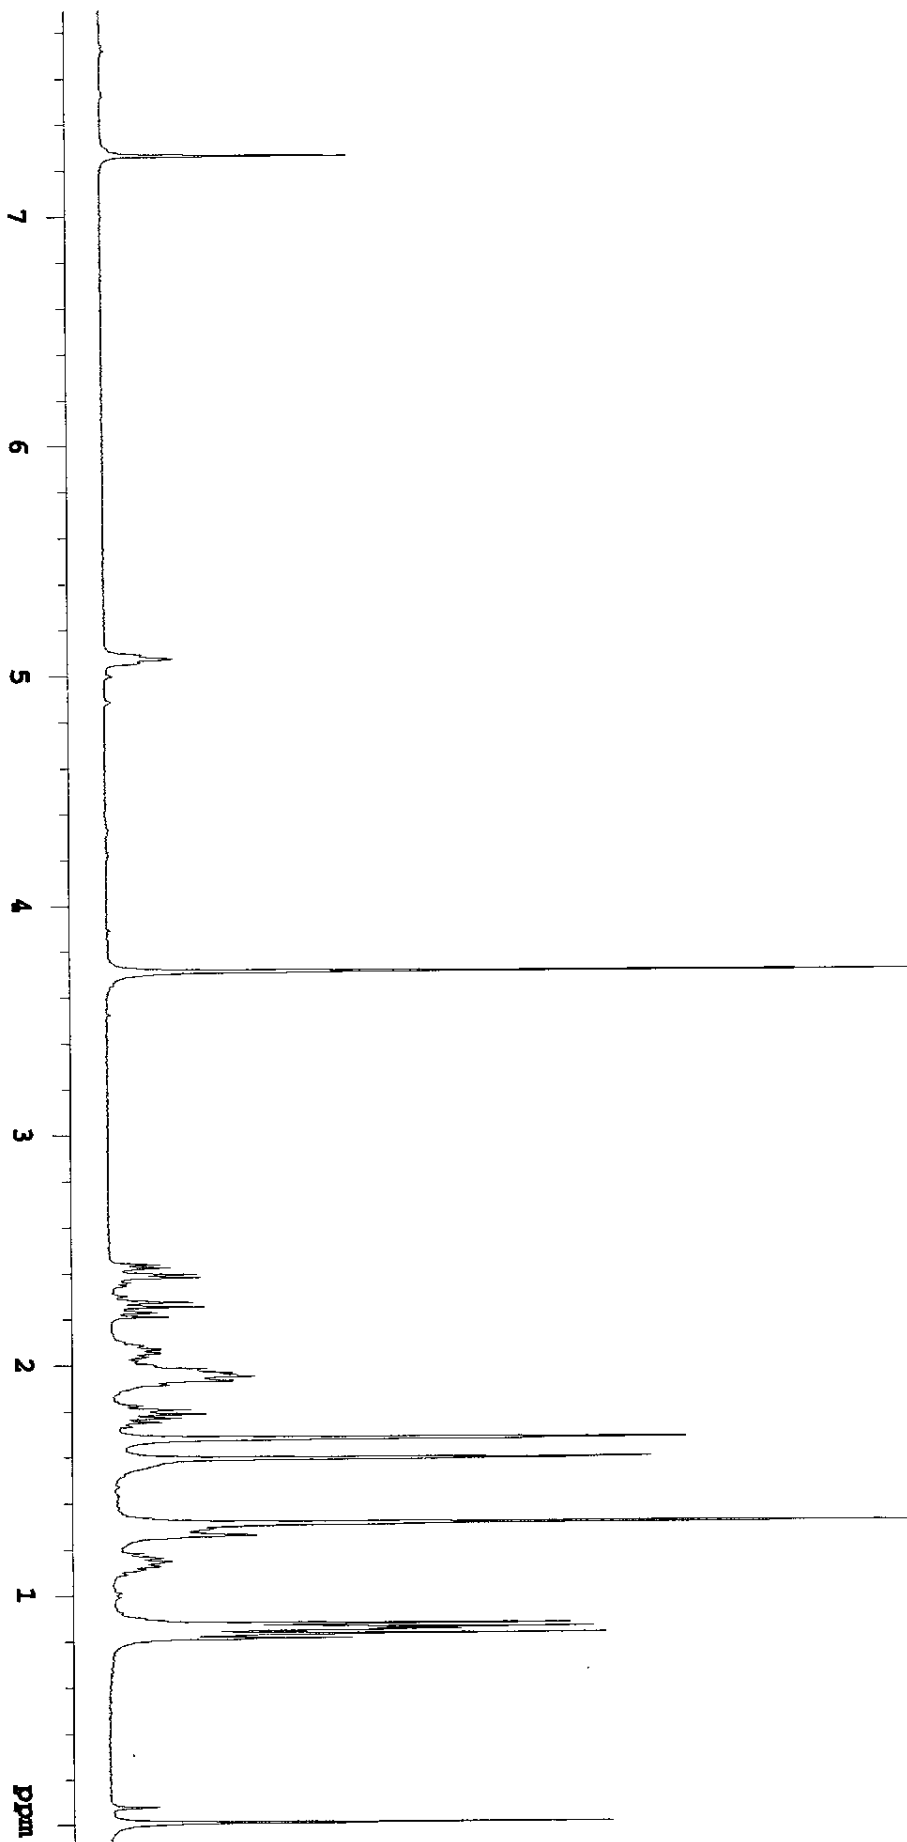

WX-11-35-6c

| INDEX | FREQUENCY | PPM     | HEIGHT |
|-------|-----------|---------|--------|
| 1     | 20829.908 | 207.209 | 18.5   |
| 2     | 17453.035 | 173.617 | 14.3   |
| 3     | 13312.488 | 131.433 | 20.4   |
| 4     | 12498.354 | 124.329 | 54.6   |
| 5     | 7771.801  | 77.311  | 259.8  |
| 6     | 7740.519  | 77.000  | 265.2  |
| 7     | 7708.475  | 76.681  | 272.9  |
| 8     | 6044.453  | 60.128  | 24.4   |
| 9     | 5244.868  | 52.174  | 58.6   |
| 10    | 4586.431  | 45.624  | 88.7   |
| 11    | 3592.339  | 36.729  | 72.9   |
| 12    | 2984.209  | 29.686  | 13.5   |
| 13    | 2828.565  | 28.138  | 71.1   |
| 14    | 2774.395  | 27.599  | 80.2   |
| 15    | 2582.891  | 25.694  | 68.7   |
| 16    | 2563.054  | 25.496  | 77.3   |
| 17    | 1963.365  | 19.531  | 75.8   |
| 18    | 1826.032  | 18.165  | 82.6   |
| 19    | 1772.625  | 17.633  | 32.4   |
| 20    | 863.173   | 8.587   | 58.9   |

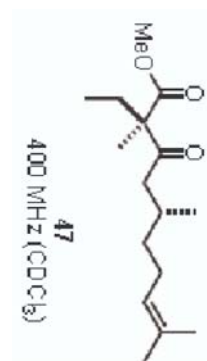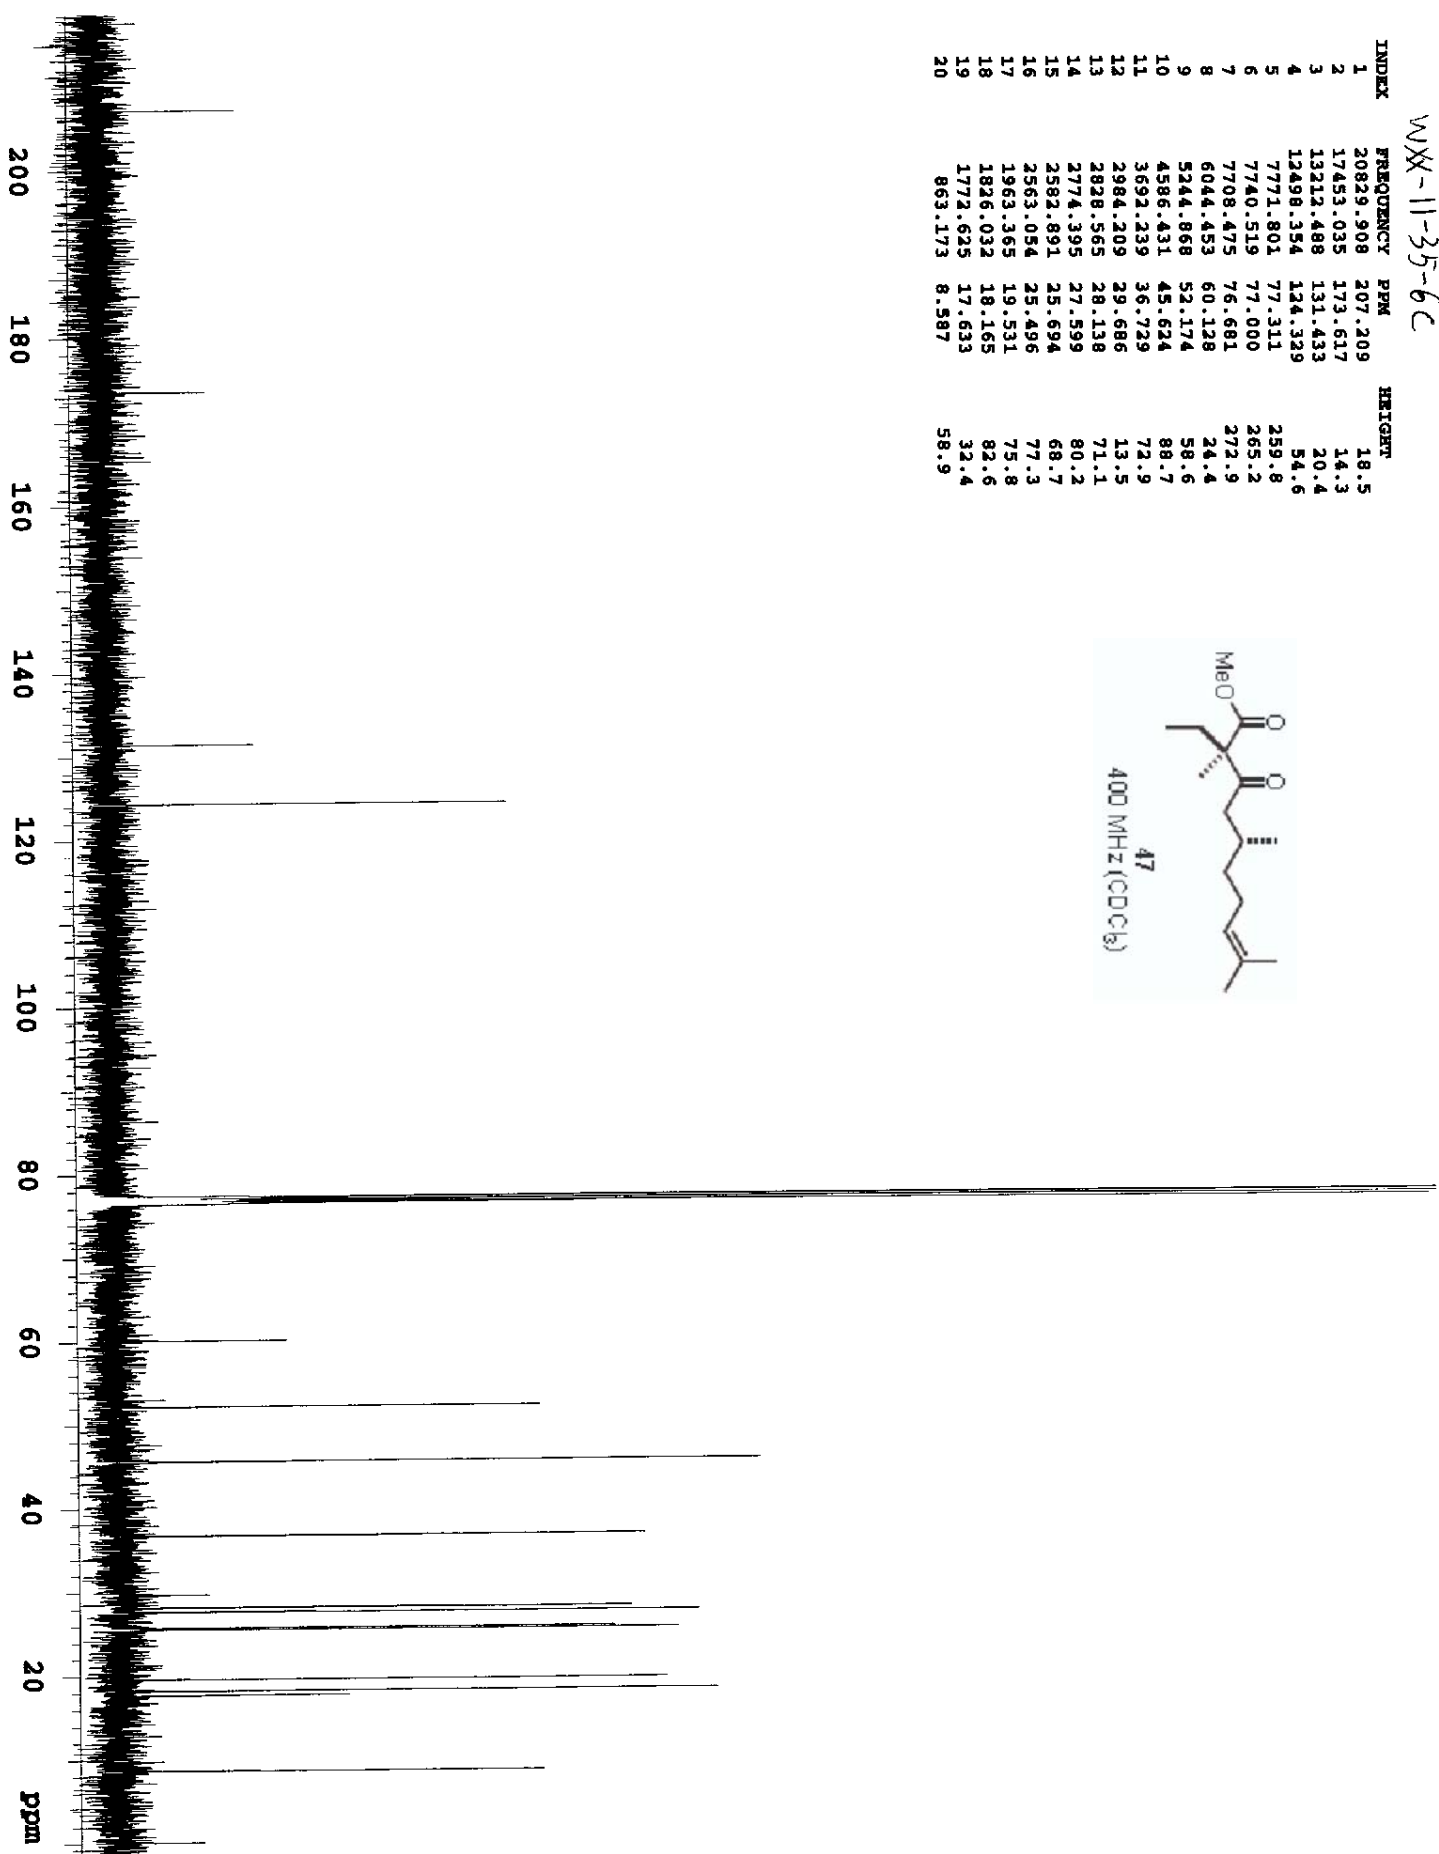

wxc-11-33-1

Pulse Sequence: s2pul

Solvent: CDCl3

Ambient temperature

File: wxc-11-33-1

INOVA-500 "gambler"

Pulse 46.1 degrees

Acq. time 1.638 sec

Width 5000.0 Hz

20 repetitions

OBSERVE H1, 399.7857971 MHz

DATA PROCESSING

F1 size 16384

Total time 3 min, 31 sec

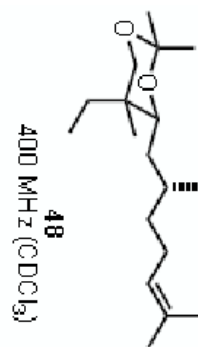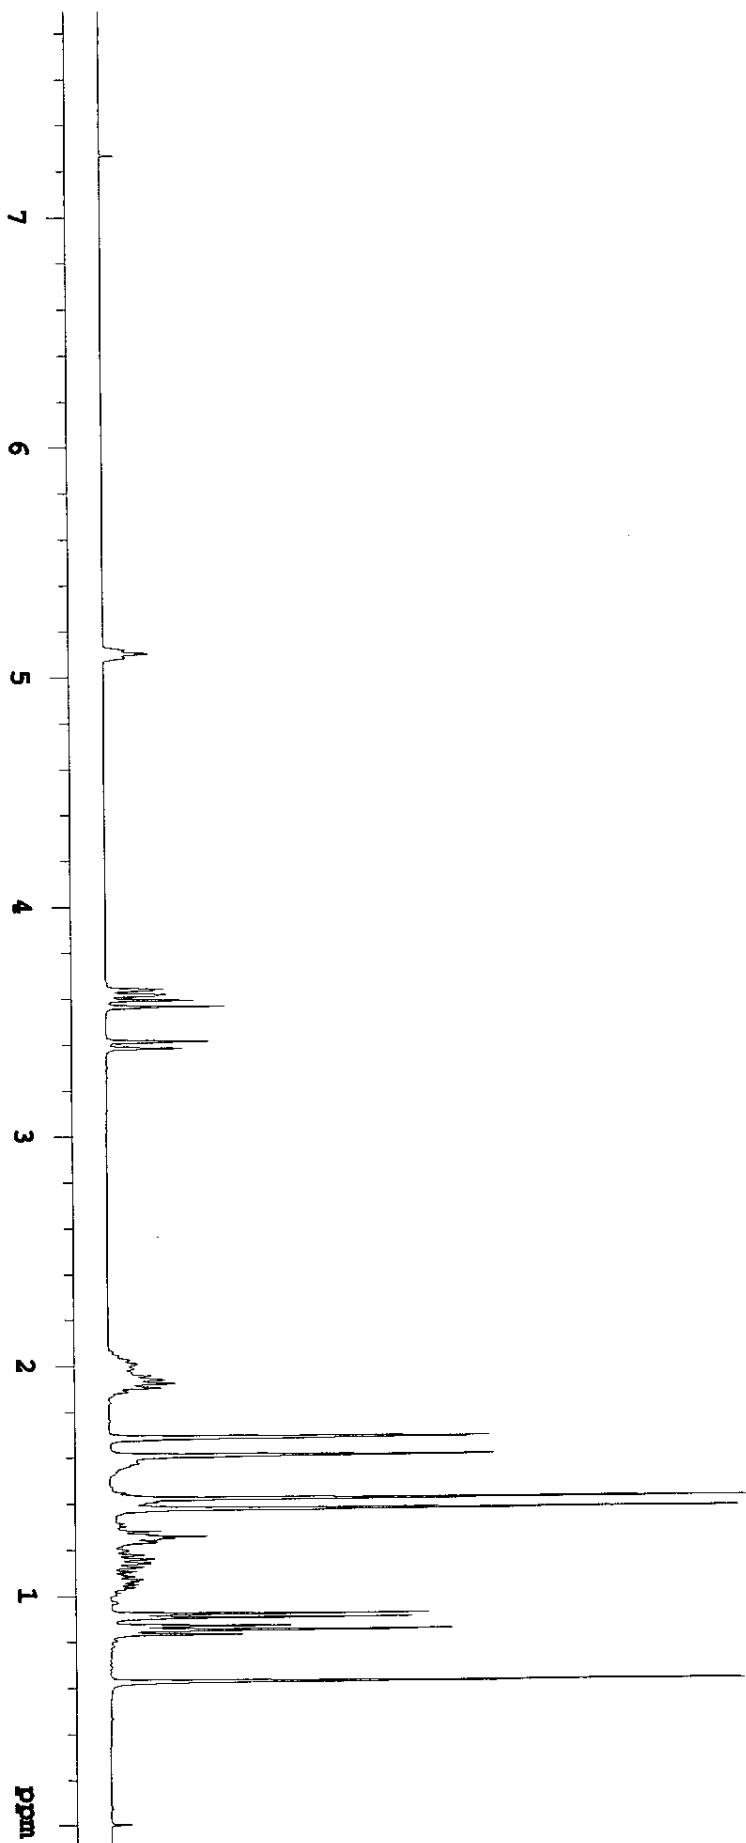

WXX-11-33-1C

| INDEX | FREQUENCY | PPM     | HEIGHT |
|-------|-----------|---------|--------|
| 1     | 13177.226 | 131.082 | 19.8   |
| 2     | 12559.245 | 124.935 | 40.1   |
| 3     | 9886.668  | 98.349  | 32.7   |
| 4     | 7772.563  | 77.319  | 25.2   |
| 5     | 7740.519  | 77.000  | 25.6   |
| 6     | 7708.476  | 76.681  | 26.1   |
| 7     | 7675.669  | 76.355  | 57.5   |
| 8     | 6753.276  | 67.179  | 58.0   |
| 9     | 3595.469  | 35.766  | 57.2   |
| 10    | 3591.654  | 35.729  | 60.0   |
| 11    | 3536.723  | 35.182  | 28.4   |
| 12    | 2979.777  | 29.642  | 63.8   |
| 13    | 2938.578  | 29.232  | 48.5   |
| 14    | 2583.811  | 25.703  | 54.2   |
| 15    | 2530.406  | 25.172  | 56.6   |
| 16    | 2152.751  | 21.415  | 51.8   |
| 17    | 2067.301  | 20.565  | 54.7   |
| 18    | 1899.455  | 18.895  | 48.3   |
| 19    | 1847.575  | 18.379  | 48.9   |
| 20    | 1769.755  | 17.605  | 26.8   |
| 21    | 784.800   | 7.807   | 42.1   |

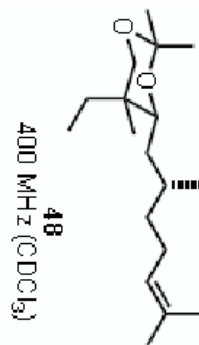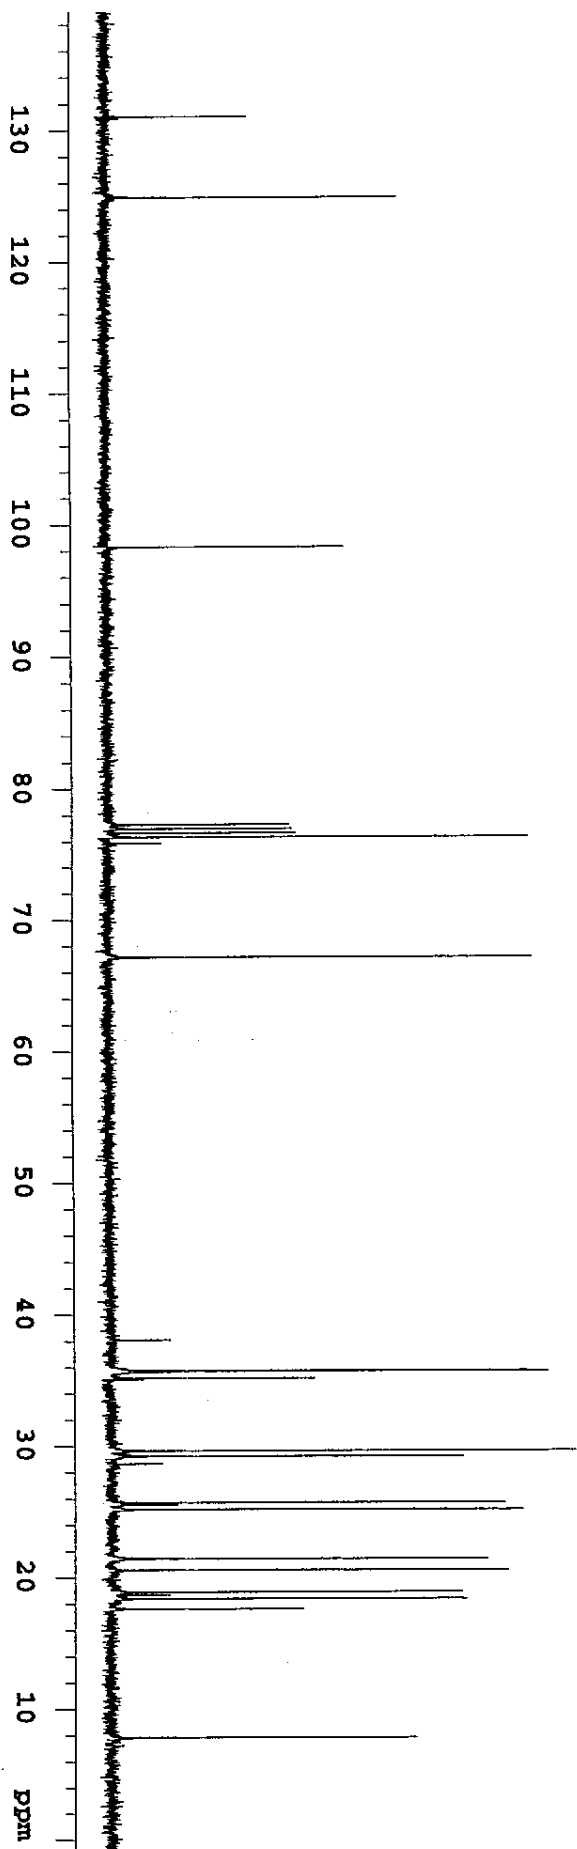





WXX-11-33-1-2DNOE  
STANDARD 1H OBSERVE

Pulse Sequence: NOESY  
Solvent: CDCl3  
Ambient temperature  
File: WXX-11-33-1\_2DNOE  
INOVA-500 "gamb1e"

Relax. delay 1.000 sec  
Mixing 0.400 sec  
Acq. time 0.205 sec  
Width 5000.0 Hz  
2D Width 5000.0 Hz  
44 repetitions  
2 x 200 increments  
OBSERVE H1, 399.7857971 MHz  
DATA PROCESSING  
Gauss apodization 0.095 sec  
F1 DATA PROCESSING  
Gauss apodization 0.037 sec  
F1 size 2048 x 2048  
Total time 8 hr, 48 sec

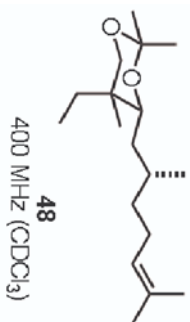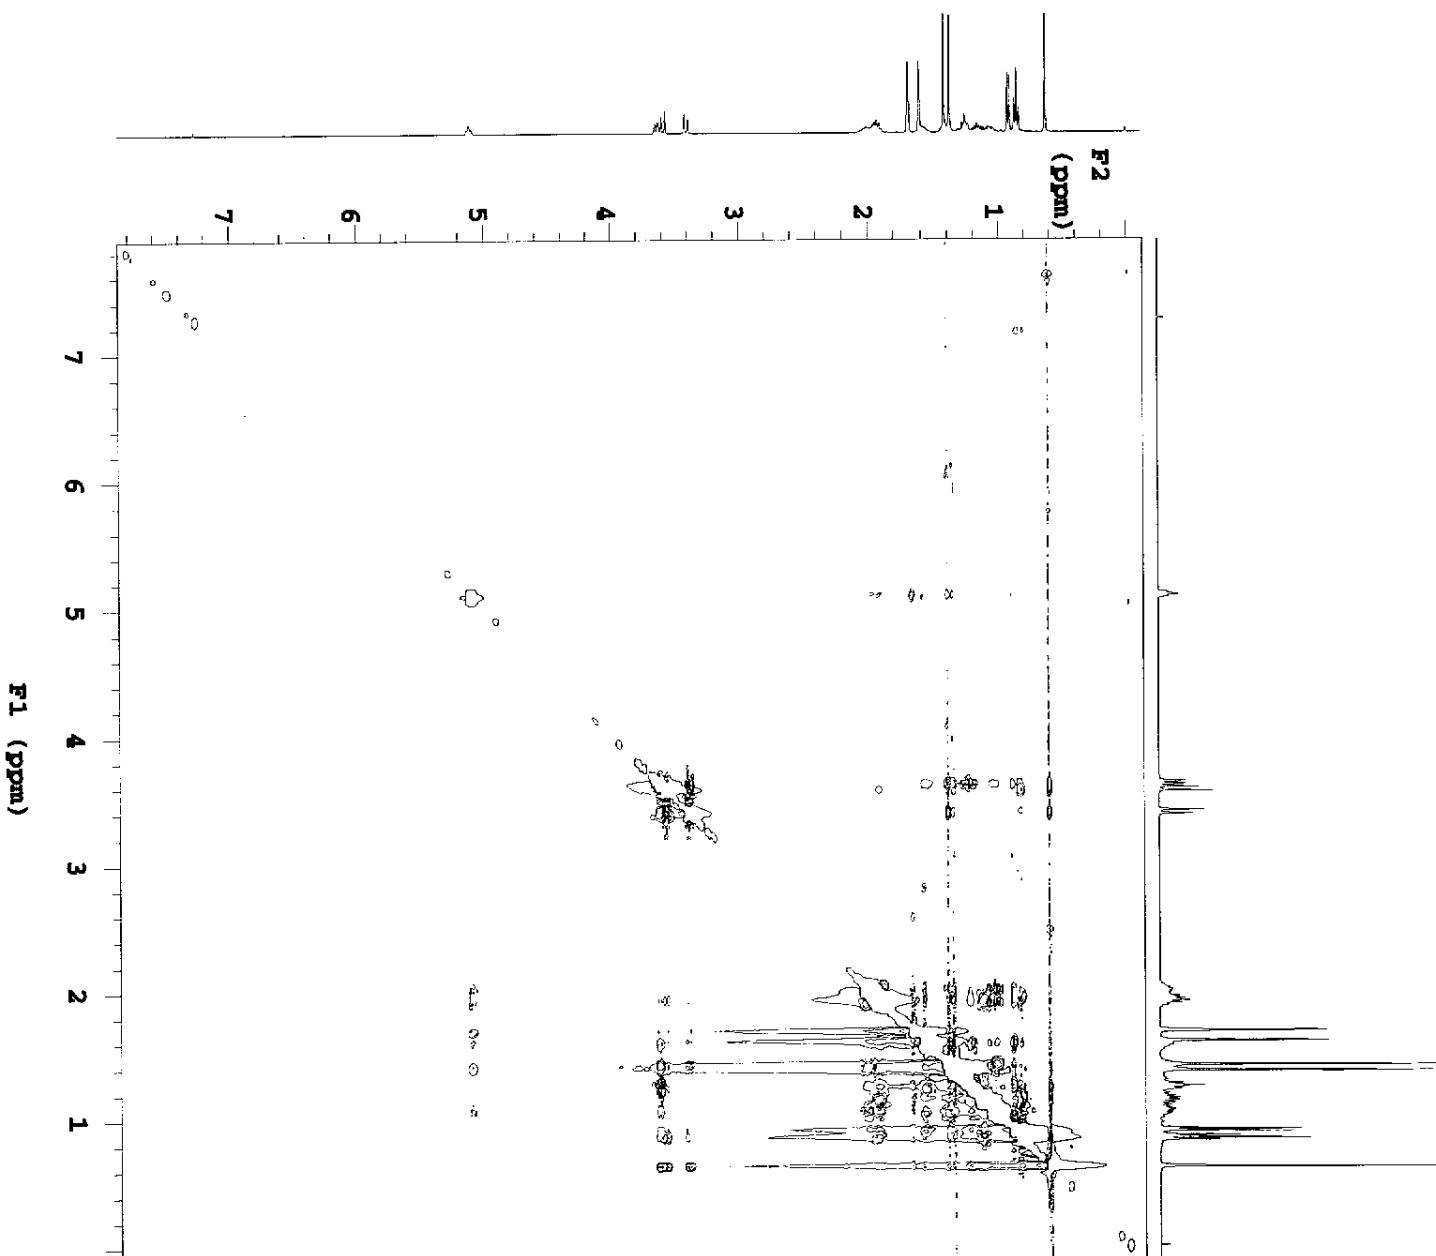

wkx-11-37-1

Pulse Sequence: s2pul1

Solvent: CDCl3

Ambient temperature

File: wkx-11-37-1

INOVA-500 "gambler"

Pulse 46.1 degrees

Acq. time 1.638 sec

Width 5000.0 Hz

19 repetitions

OBSERVE HL, 399.7857971 MHz

DATA PROCESSING

FW size 16384

Total time 3 min, 31 sec

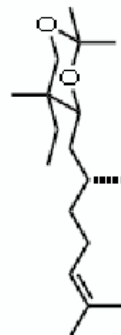

49

400 MHz (CDCl3)

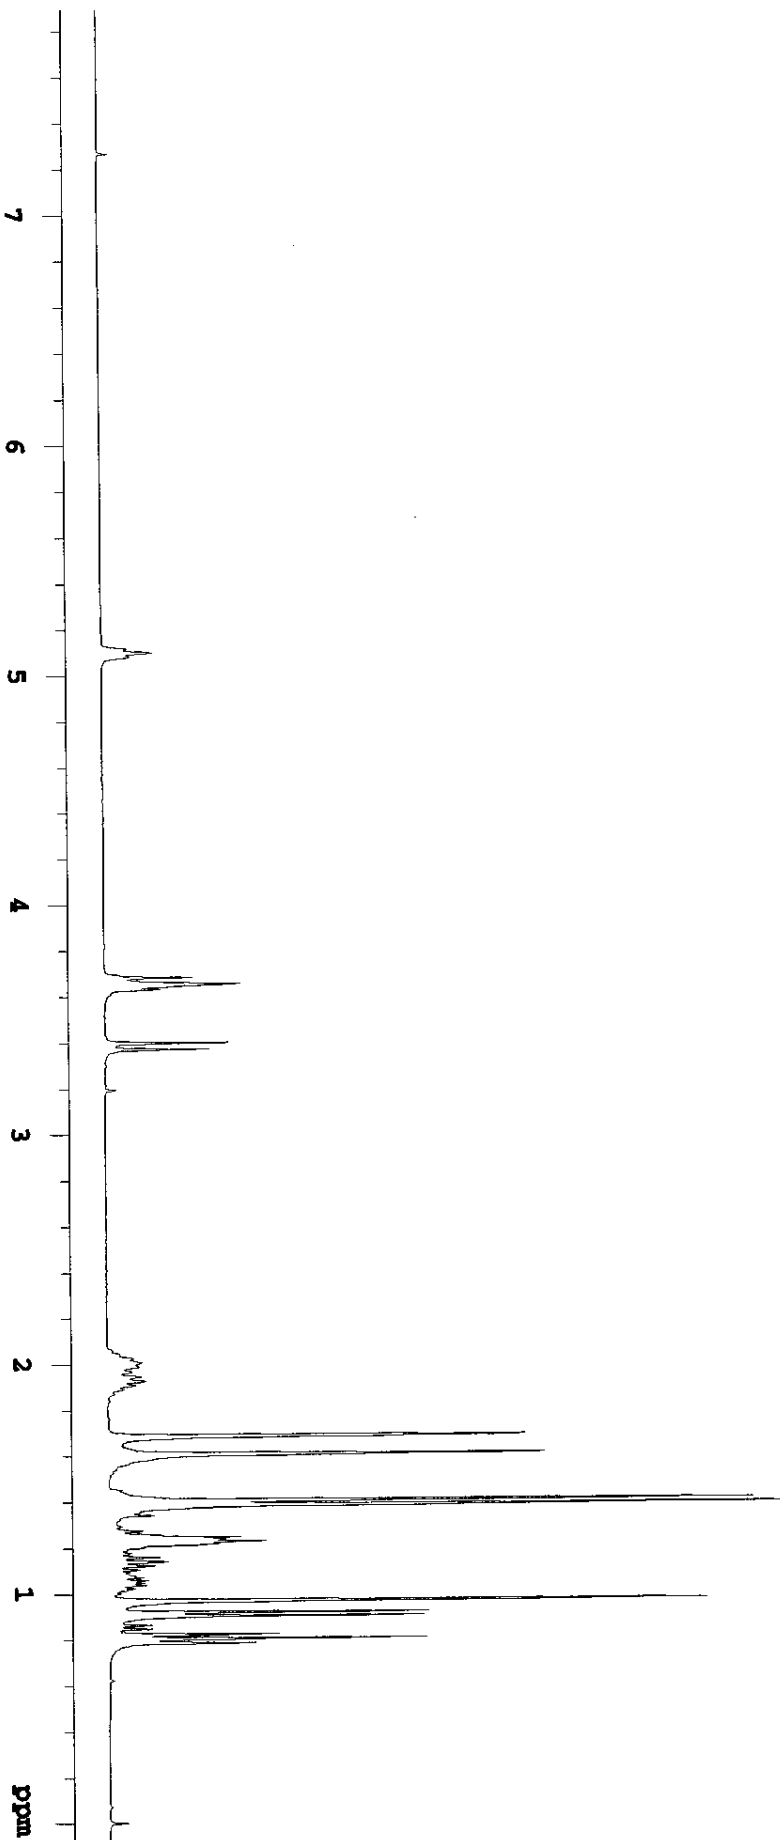

WXX-11-37-1C

| INDEX | FREQUENCY | PPM     | HEIGHT |
|-------|-----------|---------|--------|
| 1     | 13176.639 | 131.077 | 18.9   |
| 2     | 12559.392 | 124.936 | 49.2   |
| 3     | 9871.474  | 98.198  | 33.2   |
| 4     | 7772.563  | 77.319  | 29.0   |
| 5     | 7740.519  | 77.000  | 30.1   |
| 6     | 7708.475  | 76.681  | 29.0   |
| 7     | 7438.386  | 73.994  | 59.1   |
| 8     | 7024.097  | 69.873  | 59.9   |
| 9     | 3623.572  | 36.046  | 64.4   |
| 10    | 3590.765  | 35.720  | 59.8   |
| 11    | 3541.935  | 35.234  | 32.4   |
| 12    | 2953.691  | 29.382  | 63.7   |
| 13    | 2912.491  | 28.972  | 57.9   |
| 14    | 2856.032  | 28.411  | 66.2   |
| 15    | 2594.417  | 25.709  | 49.4   |
| 16    | 2532.535  | 25.193  | 57.6   |
| 17    | 2059.417  | 20.586  | 62.7   |
| 18    | 1923.691  | 19.136  | 59.1   |
| 19    | 1759.573  | 17.603  | 28.7   |
| 20    | 1581.884  | 15.736  | 57.8   |
| 21    | 725.077   | 7.213   | 53.6   |

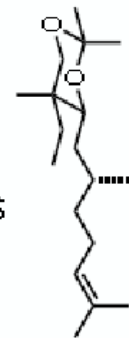

400 MHz (CDCl<sub>3</sub>)

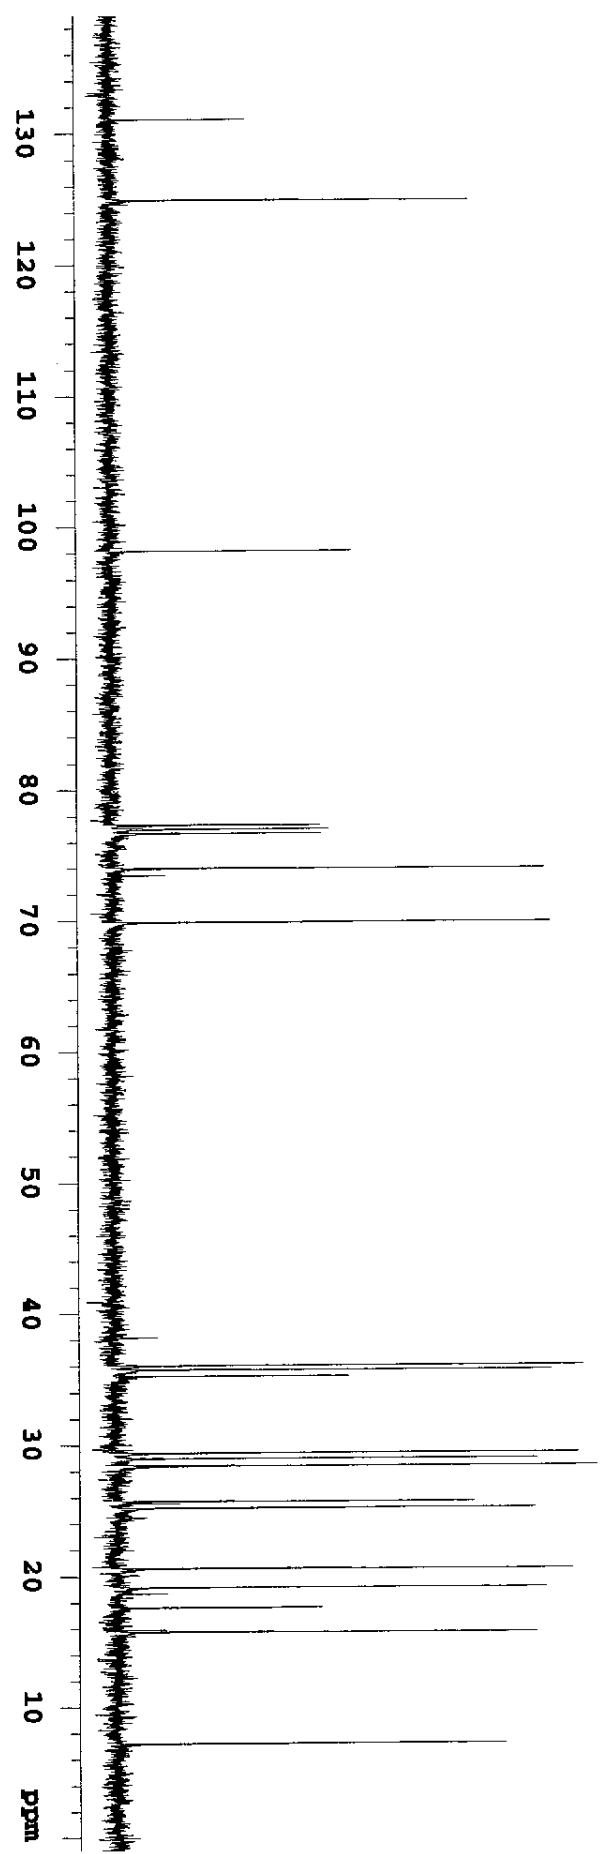

WPK-11-37-1

Pulse Sequence: gCOSY

Solvent: CDCl<sub>3</sub>

Ambient temperature

File: WPK-11-37-1COSY

INNOVA-500 "gambler"

Relax. delay 1.000 sec

Acq. time 0.205 sec

Width 5000.0 Hz

2D Width 5000.0 Hz

Single scan

128 increments

OBSERVE H1, 399.7857971 MHz

DATA PROCESSING

Sq. sine bell 0.102 sec

F1 DATA PROCESSING

Sq. sine bell 0.026 sec

F2 size 2048 x 2048

Total time 2 min, 57 sec

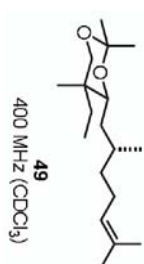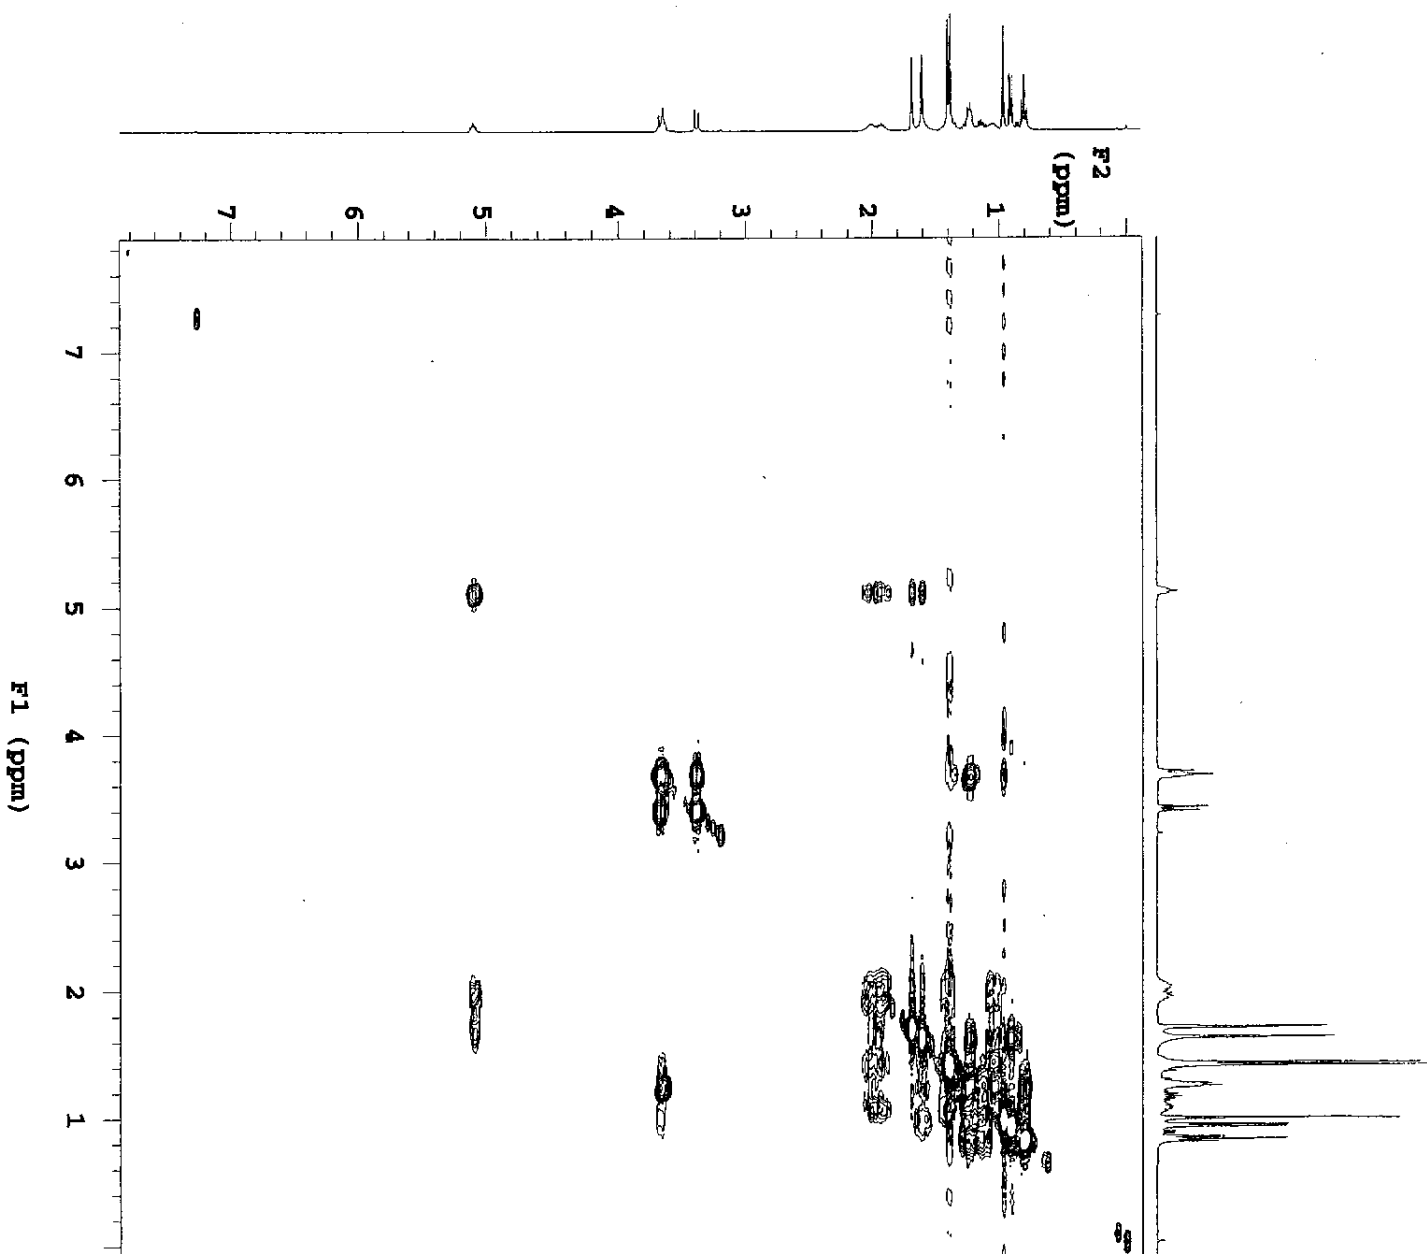

wkx-11-37-1\_benzene

Pulse Sequence: s2pul

Solvent: Benzene

Ambient temperature

File: wkx-11-37-1\_benzene

INOVA-500 "gamma"

Pulse 46.1 degrees

Acq. time 1.638 sec

Width 5000.0 Hz

76 repetitions

OBSERVE H1, 399.7858276 MHz

DATA PROCESSING

FT size 16384

Total time 3 min, 31 sec

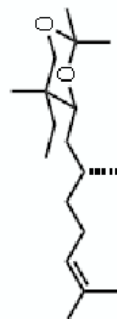

49

400 MHz (C<sub>6</sub>D<sub>6</sub>)

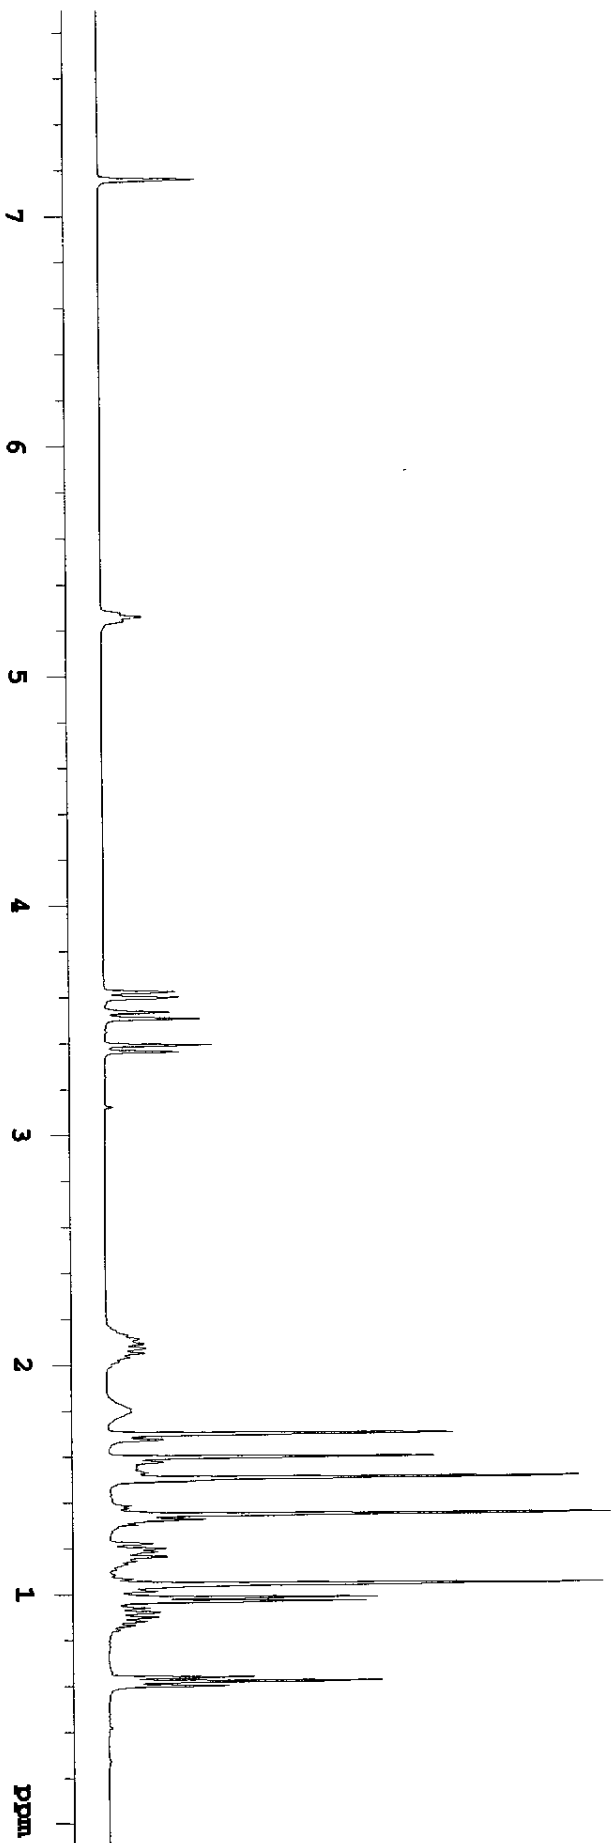

WX-11-37-1-berzene-C

| INDEX | FREQUENCY | PPM     | HEIGHT |
|-------|-----------|---------|--------|
| 1     | 13301.819 | 131.327 | 22.2   |
| 2     | 12930.968 | 128.633 | 155.7  |
| 3     | 12906.553 | 128.390 | 164.5  |
| 4     | 12882.139 | 128.147 | 166.6  |
| 5     | 12660.116 | 125.939 | 32.9   |
| 6     | 9918.028  | 98.661  | 17.4   |
| 7     | 7517.748  | 74.784  | 45.4   |
| 8     | 7060.733  | 70.238  | 58.1   |
| 9     | 3712.089  | 36.927  | 58.4   |
| 10    | 3688.438  | 36.691  | 46.6   |
| 11    | 3589.252  | 35.705  | 23.7   |
| 12    | 3040.682  | 30.248  | 57.0   |
| 13    | 3001.008  | 29.853  | 42.4   |
| 14    | 2913.267  | 28.980  | 58.1   |
| 15    | 2640.127  | 26.263  | 41.5   |
| 16    | 2629.445  | 26.157  | 54.1   |
| 17    | 2145.727  | 21.345  | 49.3   |
| 18    | 1971.008  | 19.607  | 43.7   |
| 19    | 1818.416  | 18.089  | 20.7   |
| 20    | 1644.460  | 16.359  | 51.5   |
| 21    | 772.394   | 7.684   | 42.1   |

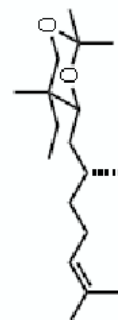

49  
400 MHz (C<sub>6</sub>D<sub>6</sub>)

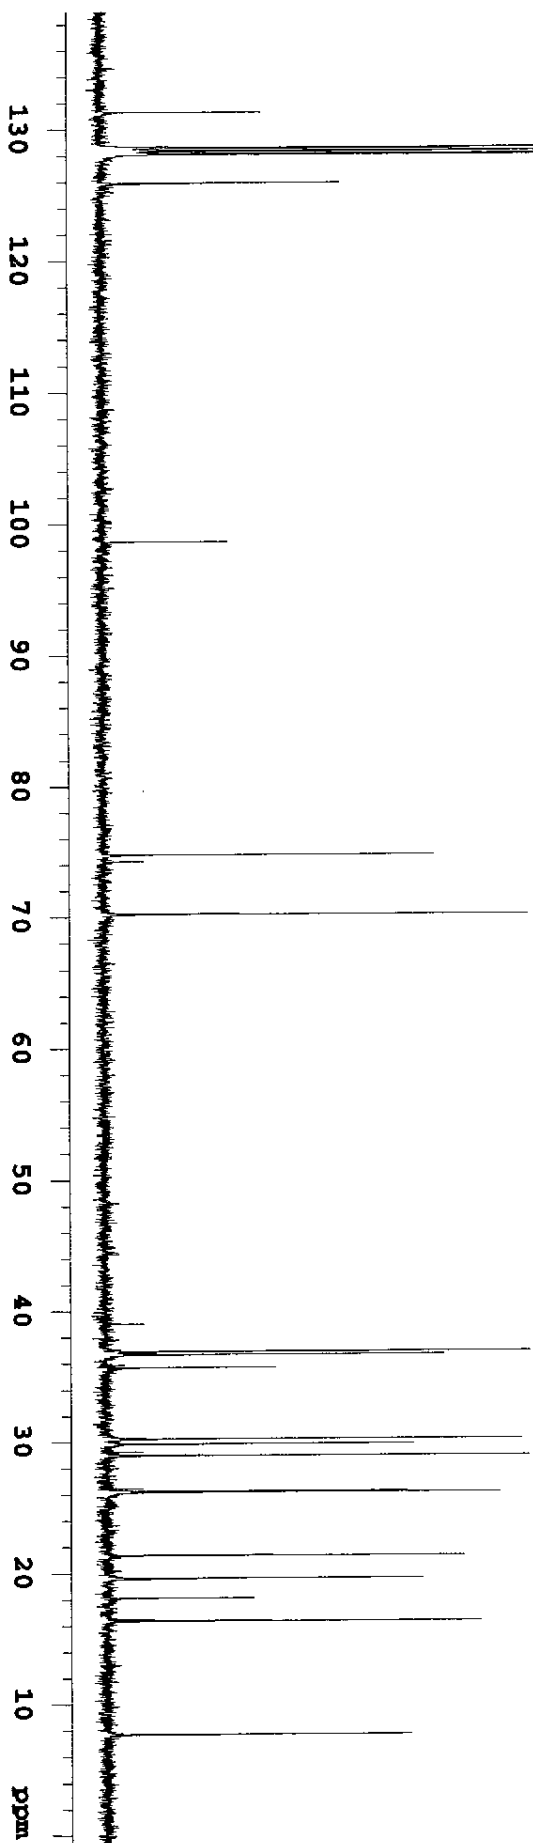

wxc-11-37-1\_benzene

Pulse Sequence: gCOSY

Solvent: Benzene

Ambient temperature

File: wxc-11-37-1\_benzene-COSY  
INOVA-500 "gambla"

Relax. delay 1.000 sec  
Acq. time 0.205 sec  
Width 5000.0 Hz  
2D Width 5000.0 Hz  
Single scan  
128 increments  
OBSERVE F1, 399.7858276 MHz  
DATA PROCESSING  
Sf. sine bell 0.102 sec  
F1 DATA PROCESSING  
Sf. sine bell 0.026 sec  
F2 size 2048 x 2048  
Total time 2 min, 57 sec

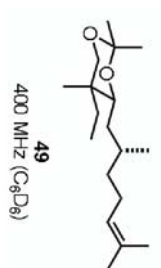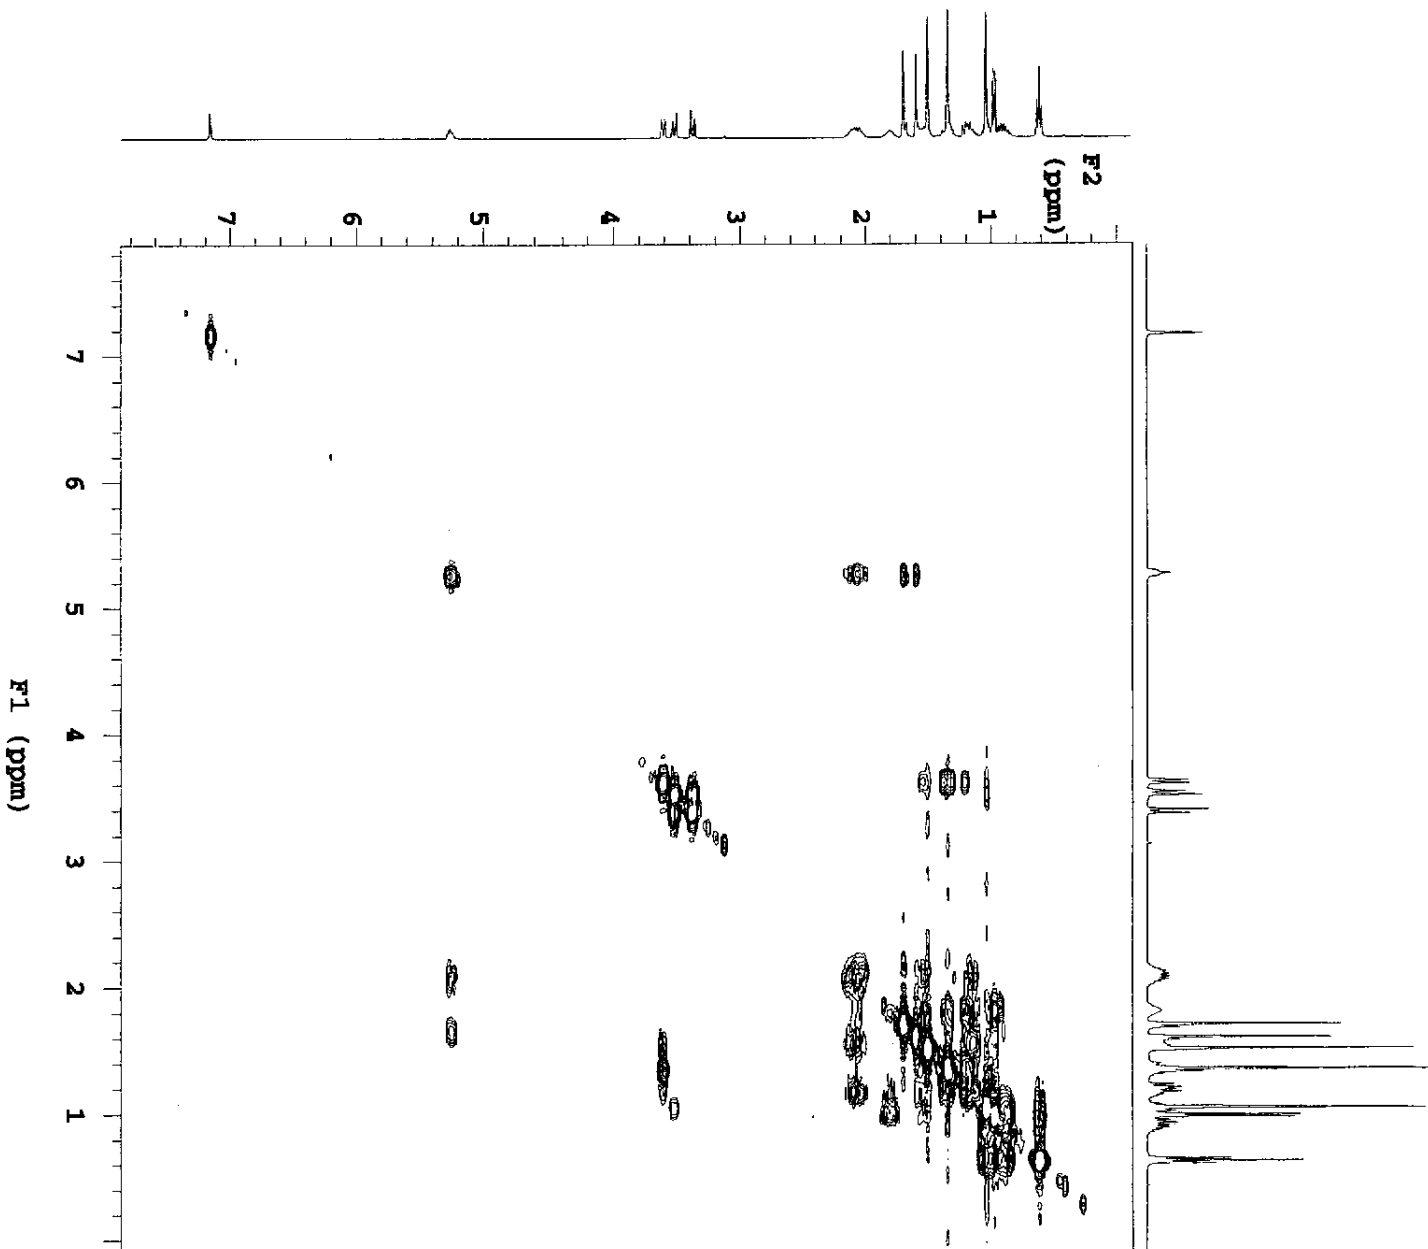



WXX-11-37-1\_benzene-2DNO2  
STANDARD 1H OBSERVE

Pulse Sequence: MZHSY  
Solvent: Benzene  
Ambient temperature  
File: wxx-11-37-1\_benzene-2DNO2  
INOVA-500 "gamble"

Relax. delay 1.000 sec  
Mixing 0.400 sec  
Acq. time 0.205 sec  
Width 5000.0 Hz  
2D Width 5000.0 Hz  
60 repetitions  
2 x 200 increments  
OBSERVE F1, 399.7858276 MHz  
DATA PROCESSING  
Gauss apodization 0.095 sec  
F1 DATA PROCESSING  
Gauss apodization 0.037 sec  
FT size 2048 x 2048  
Total time 10 hr, 55 min, 19 sec

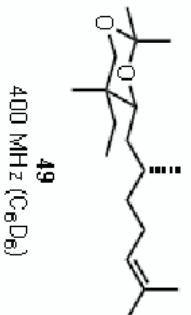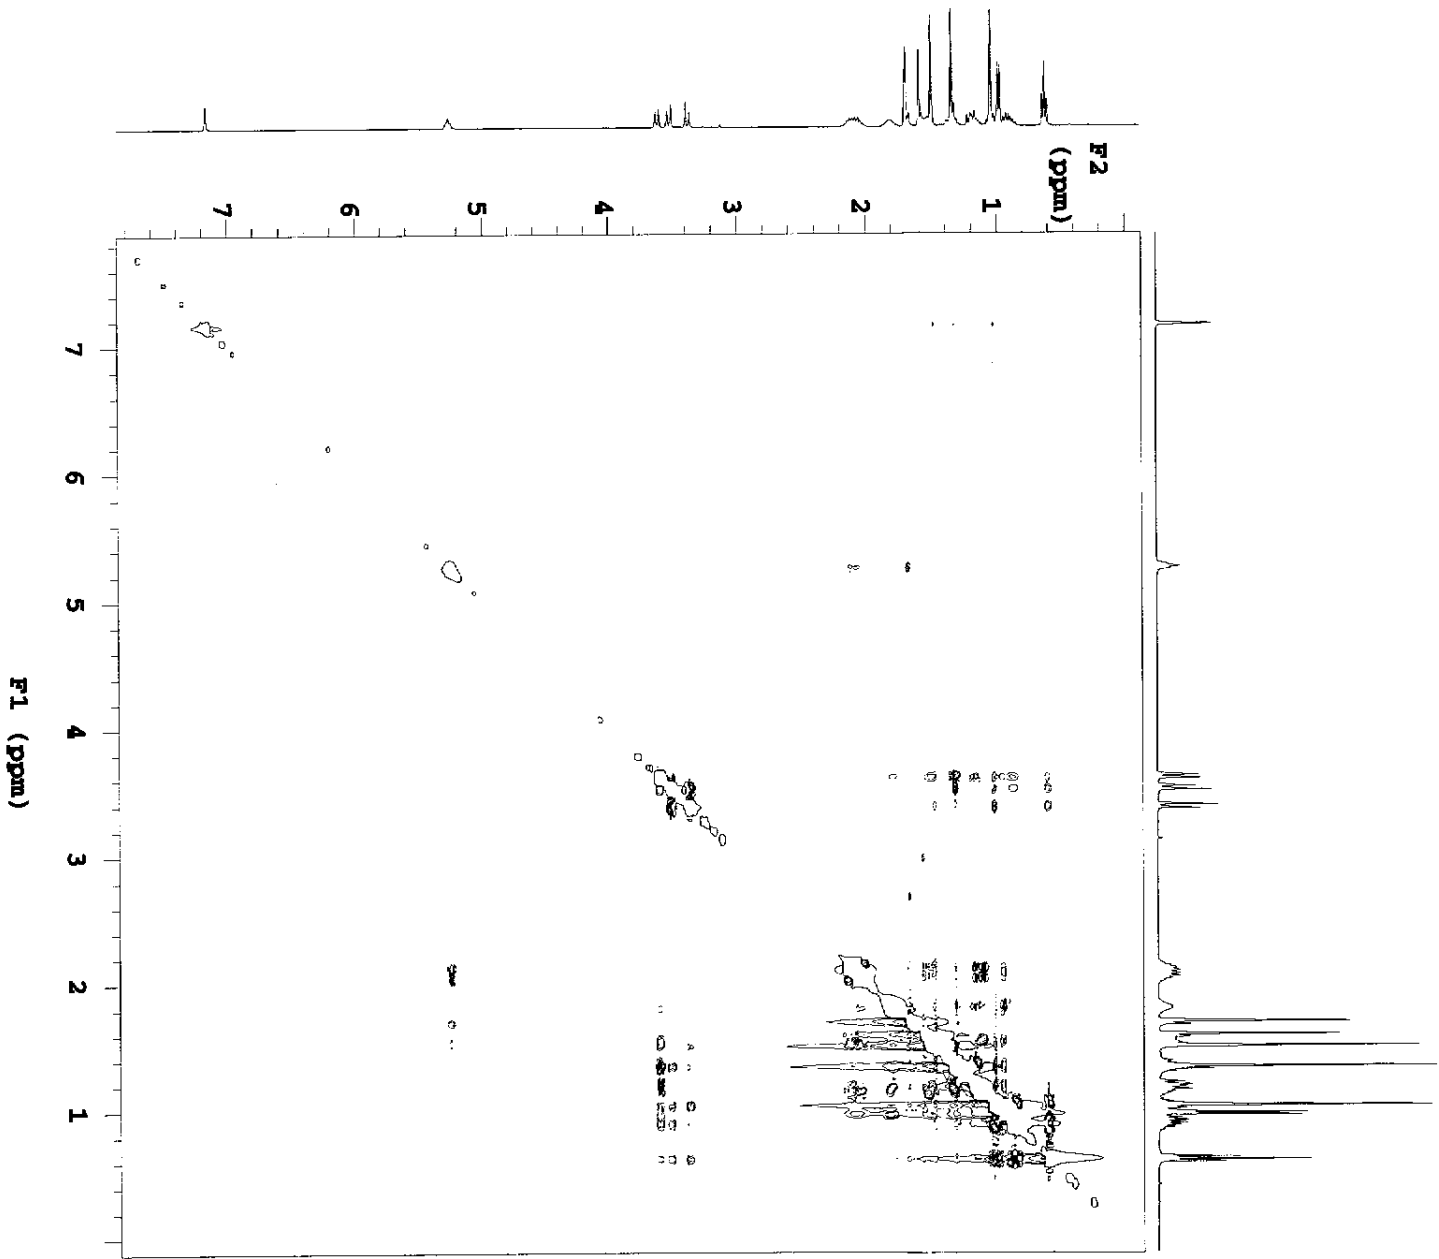

Supplement: NIHMS149394-supplement-exp_and_spectra.pdf [file NIHMS149394-supplement-exp_and_spectra.pdf]
